# Supplementary material for: Uses of Phage Display in Agriculture: Sequence Analysis and Comparative Modeling of Late Embryogenesis Abundant Client Proteins Suggest Protein-Nucleic Acid Binding Functionality
Source: Comput Math Methods Med. 2013 Jul 9;2013:470390. doi: 10.1155/2013/470390 (PMC3727180; doi:10.1155/2013/470390)
Supplement: Supplementary file 1 — LEA client protein homology models. The seven PDB coordinate files are labeled by the TAIR locus identifier of the full-length protein from which the binding region originates. [file 470390.f1.zip]

Archive with 8 entries (7 files):
- 470390.f1/
- 470390.f1/at1g54870.1.pdb
- 470390.f1/at1g75830.1.pdb
- 470390.f1/at3g55170.1.pdb
- 470390.f1/at3g58680.1.pdb
- 470390.f1/at5g18380.1.pdb
- 470390.f1/at5g44120.1.pdb
- 470390.f1/at5g46430.2.pdb
