# Supplementary material for: Uses of Phage Display in Agriculture: Sequence Analysis and Comparative Modeling of Late Embryogenesis Abundant Client Proteins Suggest Protein-Nucleic Acid Binding Functionality
Source: Comput Math Methods Med. 2013 Jul 9;2013:470390. doi: 10.1155/2013/470390 (PMC3727180; doi:10.1155/2013/470390)
Supplement: Supplementary file 1 — LEA client protein homology models. The seven PDB coordinate files are labeled by the TAIR locus identifier of the full-length protein from which the binding region originates. [file 470390.f1.zip › 470390.f1/at1g54870.1.pdb]

ATOM      1  N   MET    48       2.333  18.752 -68.624  1.00273.61           N  
ATOM      2  CA  MET    48       3.303  19.785 -68.421  1.00273.61           C  
ATOM      3  C   MET    48       2.935  20.884 -69.349  1.00273.61           C  
ATOM      4  O   MET    48       3.304  20.885 -70.521  1.00273.61           O  
ATOM      5  CB  MET    48       4.721  19.359 -68.828  1.00273.61           C  
ATOM      6  CG  MET    48       5.754  20.483 -68.738  1.00273.61           C  
ATOM      7  SD  MET    48       7.420  20.004 -69.286  1.00273.61           S  
ATOM      8  CE  MET    48       6.937  19.711 -71.013  1.00273.61           C  
ATOM      9  N   ALA    49       2.122  21.830 -68.876  1.00 77.56           N  
ATOM     10  CA  ALA    49       1.796  22.916 -69.742  1.00 77.56           C  
ATOM     11  C   ALA    49       2.937  23.879 -69.868  1.00 77.56           C  
ATOM     12  O   ALA    49       3.302  24.284 -70.972  1.00 77.56           O  
ATOM     13  CB  ALA    49       0.579  23.721 -69.254  1.00 77.56           C  
ATOM     14  N   SER    50       3.549  24.255 -68.725  1.00 41.32           N  
ATOM     15  CA  SER    50       4.556  25.280 -68.743  1.00 41.32           C  
ATOM     16  C   SER    50       5.721  24.856 -67.903  1.00 41.32           C  
ATOM     17  O   SER    50       5.667  23.845 -67.208  1.00 41.32           O  
ATOM     18  CB  SER    50       4.060  26.635 -68.208  1.00 41.32           C  
ATOM     19  OG  SER    50       3.675  26.513 -66.848  1.00 41.32           O  
ATOM     20  N   GLU    51       6.828  25.628 -67.976  1.00 38.28           N  
ATOM     21  CA  GLU    51       8.009  25.310 -67.224  1.00 38.28           C  
ATOM     22  C   GLU    51       7.753  25.647 -65.788  1.00 38.28           C  
ATOM     23  O   GLU    51       7.037  26.600 -65.482  1.00 38.28           O  
ATOM     24  CB  GLU    51       9.258  26.103 -67.653  1.00 38.28           C  
ATOM     25  CG  GLU    51       9.775  25.767 -69.055  1.00 38.28           C  
ATOM     26  CD  GLU    51      11.158  26.388 -69.175  1.00 38.28           C  
ATOM     27  OE1 GLU    51      11.897  26.363 -68.156  1.00 38.28           O  
ATOM     28  OE2 GLU    51      11.501  26.885 -70.280  1.00 38.28           O1-
ATOM     29  N   LYS    52       8.343  24.855 -64.864  1.00 50.55           N  
ATOM     30  CA  LYS    52       8.152  25.088 -63.460  1.00 50.55           C  
ATOM     31  C   LYS    52       8.786  26.394 -63.123  1.00 50.55           C  
ATOM     32  O   LYS    52       9.926  26.652 -63.505  1.00 50.55           O  
ATOM     33  CB  LYS    52       8.855  24.090 -62.530  1.00 50.55           C  
ATOM     34  CG  LYS    52       8.281  22.679 -62.451  1.00 50.55           C  
ATOM     35  CD  LYS    52       9.233  21.751 -61.689  1.00 50.55           C  
ATOM     36  CE  LYS    52       8.713  20.336 -61.440  1.00 50.55           C  
ATOM     37  NZ  LYS    52       9.736  19.557 -60.704  1.00 50.55           N1+
ATOM     38  N   GLN    53       8.055  27.247 -62.378  1.00164.86           N  
ATOM     39  CA  GLN    53       8.581  28.523 -61.983  1.00164.86           C  
ATOM     40  C   GLN    53       7.811  28.997 -60.793  1.00164.86           C  
ATOM     41  O   GLN    53       6.674  28.585 -60.569  1.00164.86           O  
ATOM     42  CB  GLN    53       8.333  29.649 -62.996  1.00164.86           C  
ATOM     43  CG  GLN    53       9.088  29.549 -64.310  1.00164.86           C  
ATOM     44  CD  GLN    53       8.401  30.526 -65.242  1.00164.86           C  
ATOM     45  NE2 GLN    53       7.239  30.086 -65.791  1.00164.86           N  
ATOM     46  OE1 GLN    53       8.859  31.648 -65.455  1.00164.86           O  
ATOM     47  N   LYS    54       8.421  29.911 -60.008  1.00 83.72           N  
ATOM     48  CA  LYS    54       7.740  30.454 -58.866  1.00 83.72           C  
ATOM     49  C   LYS    54       8.323  31.802 -58.569  1.00 83.72           C  
ATOM     50  O   LYS    54       9.541  31.969 -58.559  1.00 83.72           O  
ATOM     51  CB  LYS    54       7.970  29.613 -57.596  1.00 83.72           C  
ATOM     52  CG  LYS    54       7.281  30.148 -56.337  1.00 83.72           C  
ATOM     53  CD  LYS    54       7.401  29.210 -55.130  1.00 83.72           C  
ATOM     54  CE  LYS    54       6.796  29.779 -53.843  1.00 83.72           C  
ATOM     55  NZ  LYS    54       7.626  30.897 -53.342  1.00 83.72           N1+
ATOM     56  N   GLN    55       7.471  32.820 -58.325  1.00121.12           N  
ATOM     57  CA  GLN    55       8.038  34.062 -57.890  1.00121.12           C  
ATOM     58  C   GLN    55       7.604  34.301 -56.476  1.00121.12           C  
ATOM     59  O   GLN    55       6.493  33.961 -56.073  1.00121.12           O  
ATOM     60  CB  GLN    55       7.831  35.267 -58.830  1.00121.12           C  
ATOM     61  CG  GLN    55       6.403  35.639 -59.201  1.00121.12           C  
ATOM     62  CD  GLN    55       6.535  36.807 -60.176  1.00121.12           C  
ATOM     63  NE2 GLN    55       5.968  36.650 -61.404  1.00121.12           N  
ATOM     64  OE1 GLN    55       7.148  37.824 -59.859  1.00121.12           O  
ATOM     65  N   HIS    56       8.538  34.846 -55.671  1.00 89.15           N  
ATOM     66  CA  HIS    56       8.396  35.009 -54.250  1.00 89.15           C  
ATOM     67  C   HIS    56       7.359  36.012 -53.846  1.00 89.15           C  
ATOM     68  O   HIS    56       6.726  35.839 -52.806  1.00 89.15           O  
ATOM     69  CB  HIS    56       9.709  35.384 -53.540  1.00 89.15           C  
ATOM     70  CG  HIS    56       9.562  35.379 -52.045  1.00 89.15           C  
ATOM     71  CD2 HIS    56       9.533  36.415 -51.164  1.00 89.15           C  
ATOM     72  ND1 HIS    56       9.415  34.236 -51.288  1.00 89.15           N  
ATOM     73  CE1 HIS    56       9.304  34.635 -49.996  1.00 89.15           C  
ATOM     74  NE2 HIS    56       9.370  35.948 -49.871  1.00 89.15           N  
ATOM     75  N   ALA    57       7.163  37.105 -54.609  1.00 43.49           N  
ATOM     76  CA  ALA    57       6.235  38.083 -54.109  1.00 43.49           C  
ATOM     77  C   ALA    57       5.151  38.355 -55.107  1.00 43.49           C  
ATOM     78  O   ALA    57       5.339  38.199 -56.311  1.00 43.49           O  
ATOM     79  CB  ALA    57       6.893  39.433 -53.774  1.00 43.49           C  
ATOM     80  N   GLN    58       3.961  38.749 -54.598  1.00121.14           N  
ATOM     81  CA  GLN    58       2.848  39.113 -55.434  1.00121.14           C  
ATOM     82  C   GLN    58       2.568  40.554 -55.165  1.00121.14           C  
ATOM     83  O   GLN    58       2.747  41.005 -54.034  1.00121.14           O  
ATOM     84  CB  GLN    58       1.507  38.452 -55.084  1.00121.14           C  
ATOM     85  CG  GLN    58       1.423  36.946 -55.278  1.00121.14           C  
ATOM     86  CD  GLN    58       0.009  36.557 -54.873  1.00121.14           C  
ATOM     87  NE2 GLN    58      -0.113  35.713 -53.814  1.00121.14           N  
ATOM     88  OE1 GLN    58      -0.966  37.005 -55.477  1.00121.14           O  
ATOM     89  N   PRO    59       2.106  41.314 -56.121  1.00 83.13           N  
ATOM     90  CA  PRO    59       1.803  40.922 -57.473  1.00 83.13           C  
ATOM     91  C   PRO    59       3.041  40.516 -58.214  1.00 83.13           C  
ATOM     92  O   PRO    59       4.113  41.040 -57.915  1.00 83.13           O  
ATOM     93  CB  PRO    59       1.120  42.132 -58.111  1.00 83.13           C  
ATOM     94  CG  PRO    59       1.607  43.323 -57.265  1.00 83.13           C  
ATOM     95  CD  PRO    59       1.818  42.716 -55.872  1.00 83.13           C  
ATOM     96  N   GLY    60       2.905  39.602 -59.199  1.00 36.68           N  
ATOM     97  CA  GLY    60       4.044  39.090 -59.908  1.00 36.68           C  
ATOM     98  C   GLY    60       4.518  40.040 -60.963  1.00 36.68           C  
ATOM     99  O   GLY    60       3.827  40.986 -61.342  1.00 36.68           O  
ATOM    100  N   LYS    61       5.745  39.772 -61.472  1.00112.31           N  
ATOM    101  CA  LYS    61       6.312  40.575 -62.514  1.00112.31           C  
ATOM    102  C   LYS    61       6.373  39.738 -63.758  1.00112.31           C  
ATOM    103  O   LYS    61       6.856  38.605 -63.754  1.00112.31           O  
ATOM    104  CB  LYS    61       7.738  41.076 -62.260  1.00112.31           C  
ATOM    105  CG  LYS    61       8.146  42.094 -63.327  1.00112.31           C  
ATOM    106  CD  LYS    61       9.548  42.673 -63.161  1.00112.31           C  
ATOM    107  CE  LYS    61      10.602  41.903 -63.961  1.00112.31           C  
ATOM    108  NZ  LYS    61      11.876  42.654 -63.968  1.00112.31           N1+
ATOM    109  N   GLU    62       5.875  40.305 -64.872  1.00 72.31           N  
ATOM    110  CA  GLU    62       5.776  39.611 -66.125  1.00 72.31           C  
ATOM    111  C   GLU    62       7.115  39.349 -66.750  1.00 72.31           C  
ATOM    112  O   GLU    62       7.302  38.317 -67.392  1.00 72.31           O  
ATOM    113  CB  GLU    62       4.882  40.325 -67.155  1.00 72.31           C  
ATOM    114  CG  GLU    62       4.593  39.448 -68.379  1.00 72.31           C  
ATOM    115  CD  GLU    62       3.345  39.973 -69.074  1.00 72.31           C  
ATOM    116  OE1 GLU    62       2.449  40.500 -68.361  1.00 72.31           O  
ATOM    117  OE2 GLU    62       3.265  39.842 -70.325  1.00 72.31           O1-
ATOM    118  N   HIS    63       8.088  40.262 -66.582  1.00115.92           N  
ATOM    119  CA  HIS    63       9.352  40.129 -67.252  1.00115.92           C  
ATOM    120  C   HIS    63      10.042  38.870 -66.821  1.00115.92           C  
ATOM    121  O   HIS    63      10.786  38.269 -67.594  1.00115.92           O  
ATOM    122  CB  HIS    63      10.317  41.294 -66.981  1.00115.92           C  
ATOM    123  CG  HIS    63      11.594  41.099 -67.739  1.00115.92           C  
ATOM    124  CD2 HIS    63      12.874  40.943 -67.302  1.00115.92           C  
ATOM    125  ND1 HIS    63      11.653  41.020 -69.111  1.00115.92           N  
ATOM    126  CE1 HIS    63      12.954  40.818 -69.437  1.00115.92           C  
ATOM    127  NE2 HIS    63      13.733  40.763 -68.373  1.00115.92           N  
ATOM    128  N   VAL    64       9.833  38.476 -65.557  1.00 61.62           N  
ATOM    129  CA  VAL    64      10.429  37.337 -64.919  1.00 61.62           C  
ATOM    130  C   VAL    64       9.951  36.037 -65.517  1.00 61.62           C  
ATOM    131  O   VAL    64      10.638  35.023 -65.415  1.00 61.62           O  
ATOM    132  CB  VAL    64      10.084  37.281 -63.455  1.00 61.62           C  
ATOM    133  CG1 VAL    64      10.709  36.013 -62.852  1.00 61.62           C  
ATOM    134  CG2 VAL    64      10.538  38.591 -62.787  1.00 61.62           C  
ATOM    135  N   MET    65       8.743  36.011 -66.111  1.00 86.28           N  
ATOM    136  CA  MET    65       8.116  34.780 -66.528  1.00 86.28           C  
ATOM    137  C   MET    65       8.717  34.163 -67.756  1.00 86.28           C  
ATOM    138  O   MET    65       9.270  34.837 -68.625  1.00 86.28           O  
ATOM    139  CB  MET    65       6.613  34.960 -66.792  1.00 86.28           C  
ATOM    140  CG  MET    65       5.828  35.394 -65.552  1.00 86.28           C  
ATOM    141  SD  MET    65       4.061  35.703 -65.851  1.00 86.28           S  
ATOM    142  CE  MET    65       3.649  33.958 -66.137  1.00 86.28           C  
ATOM    143  N   GLU    66       8.631  32.811 -67.826  1.00171.63           N  
ATOM    144  CA  GLU    66       9.079  32.078 -68.976  1.00171.63           C  
ATOM    145  C   GLU    66       8.088  30.980 -69.226  1.00171.63           C  
ATOM    146  O   GLU    66       7.861  30.123 -68.371  1.00171.63           O  
ATOM    147  CB  GLU    66      10.445  31.409 -68.790  1.00171.63           C  
ATOM    148  CG  GLU    66      10.982  30.812 -70.089  1.00171.63           C  
ATOM    149  CD  GLU    66      12.283  30.098 -69.773  1.00171.63           C  
ATOM    150  OE1 GLU    66      12.521  29.808 -68.569  1.00171.63           O  
ATOM    151  OE2 GLU    66      13.059  29.837 -70.730  1.00171.63           O1-
ATOM    152  N   SER    67       7.479  30.952 -70.426  1.00155.99           N  
ATOM    153  CA  SER    67       7.743  31.926 -71.440  1.00155.99           C  
ATOM    154  C   SER    67       6.980  33.164 -71.103  1.00155.99           C  
ATOM    155  O   SER    67       6.151  33.172 -70.194  1.00155.99           O  
ATOM    156  CB  SER    67       7.282  31.486 -72.838  1.00155.99           C  
ATOM    157  OG  SER    67       5.868  31.359 -72.862  1.00155.99           O  
ATOM    158  N   SER    68       7.268  34.264 -71.825  1.00 71.02           N  
ATOM    159  CA  SER    68       6.534  35.465 -71.567  1.00 71.02           C  
ATOM    160  C   SER    68       5.150  35.225 -72.066  1.00 71.02           C  
ATOM    161  O   SER    68       4.938  34.517 -73.049  1.00 71.02           O  
ATOM    162  CB  SER    68       7.071  36.705 -72.303  1.00 71.02           C  
ATOM    163  OG  SER    68       6.279  37.840 -71.981  1.00 71.02           O  
ATOM    164  N   PRO    69       4.191  35.805 -71.405  1.00 73.37           N  
ATOM    165  CA  PRO    69       2.840  35.627 -71.842  1.00 73.37           C  
ATOM    166  C   PRO    69       2.693  36.317 -73.152  1.00 73.37           C  
ATOM    167  O   PRO    69       3.399  37.298 -73.379  1.00 73.37           O  
ATOM    168  CB  PRO    69       1.968  36.191 -70.722  1.00 73.37           C  
ATOM    169  CG  PRO    69       2.827  35.983 -69.461  1.00 73.37           C  
ATOM    170  CD  PRO    69       4.279  36.027 -69.970  1.00 73.37           C  
ATOM    171  N   GLN    70       1.818  35.814 -74.041  0.50120.09           N  
ATOM    172  CA  GLN    70       1.654  36.498 -75.285  0.50120.09           C  
ATOM    173  C   GLN    70       0.476  37.403 -75.128  0.50120.09           C  
ATOM    174  O   GLN    70      -0.678  36.980 -75.100  0.50120.09           O  
ATOM    175  CB  GLN    70       1.460  35.555 -76.483  0.50120.09           C  
ATOM    176  CG  GLN    70       0.209  34.690 -76.393  0.50120.09           C  
ATOM    177  CD  GLN    70       0.192  33.805 -77.629  0.50120.09           C  
ATOM    178  NE2 GLN    70      -0.912  33.888 -78.415  0.50120.09           N  
ATOM    179  OE1 GLN    70       1.137  33.064 -77.891  0.50120.09           O  
ATOM    180  N   PHE    71       0.805  38.689 -74.928  1.00186.27           N  
ATOM    181  CA  PHE    71      -0.058  39.810 -74.710  1.00186.27           C  
ATOM    182  C   PHE    71      -0.693  40.364 -75.948  1.00186.27           C  
ATOM    183  O   PHE    71      -1.703  41.063 -75.855  1.00186.27           O  
ATOM    184  CB  PHE    71       0.619  40.918 -73.879  1.00186.27           C  
ATOM    185  CG  PHE    71       1.971  41.191 -74.440  1.00186.27           C  
ATOM    186  CD1 PHE    71       3.053  40.477 -73.974  1.00186.27           C  
ATOM    187  CD2 PHE    71       2.168  42.140 -75.414  1.00186.27           C  
ATOM    188  CE1 PHE    71       4.314  40.703 -74.469  1.00186.27           C  
ATOM    189  CE2 PHE    71       3.428  42.371 -75.912  1.00186.27           C  
ATOM    190  CZ  PHE    71       4.501  41.654 -75.440  1.00186.27           C  
ATOM    191  N   SER    72      -0.077  40.162 -77.131  1.00 88.28           N  
ATOM    192  CA  SER    72      -0.663  40.736 -78.309  1.00 88.28           C  
ATOM    193  C   SER    72      -0.756  39.716 -79.401  1.00 88.28           C  
ATOM    194  O   SER    72       0.054  38.794 -79.489  1.00 88.28           O  
ATOM    195  CB  SER    72       0.141  41.924 -78.869  1.00 88.28           C  
ATOM    196  OG  SER    72       0.173  42.980 -77.920  1.00 88.28           O  
ATOM    197  N   SER    73      -1.777  39.854 -80.273  1.00 81.12           N  
ATOM    198  CA  SER    73      -1.868  38.949 -81.377  1.00 81.12           C  
ATOM    199  C   SER    73      -1.421  39.706 -82.579  1.00 81.12           C  
ATOM    200  O   SER    73      -1.919  40.791 -82.869  1.00 81.12           O  
ATOM    201  CB  SER    73      -3.266  38.377 -81.665  1.00 81.12           C  
ATOM    202  OG  SER    73      -3.515  37.268 -80.813  1.00 81.12           O  
ATOM    203  N   SER    74      -0.461  39.130 -83.321  1.00 35.05           N  
ATOM    204  CA  SER    74       0.118  39.833 -84.425  1.00 35.05           C  
ATOM    205  C   SER    74      -0.917  40.130 -85.464  1.00 35.05           C  
ATOM    206  O   SER    74      -0.932  41.221 -86.031  1.00 35.05           O  
ATOM    207  CB  SER    74       1.254  39.052 -85.113  1.00 35.05           C  
ATOM    208  OG  SER    74       0.742  37.890 -85.748  1.00 35.05           O  
ATOM    209  N   ASP    75      -1.819  39.175 -85.742  1.00102.56           N  
ATOM    210  CA  ASP    75      -2.781  39.354 -86.791  1.00102.56           C  
ATOM    211  C   ASP    75      -3.788  40.418 -86.458  1.00102.56           C  
ATOM    212  O   ASP    75      -4.330  41.040 -87.368  1.00102.56           O  
ATOM    213  CB  ASP    75      -3.534  38.065 -87.175  1.00102.56           C  
ATOM    214  CG  ASP    75      -4.369  37.585 -86.000  1.00102.56           C  
ATOM    215  OD1 ASP    75      -4.115  38.046 -84.855  1.00102.56           O  
ATOM    216  OD2 ASP    75      -5.275  36.742 -86.234  1.00102.56           O1-
ATOM    217  N   TYR    76      -4.062  40.652 -85.156  1.00 72.65           N  
ATOM    218  CA  TYR    76      -5.114  41.529 -84.709  1.00 72.65           C  
ATOM    219  C   TYR    76      -5.040  42.838 -85.434  1.00 72.65           C  
ATOM    220  O   TYR    76      -4.003  43.497 -85.460  1.00 72.65           O  
ATOM    221  CB  TYR    76      -5.021  41.810 -83.197  1.00 72.65           C  
ATOM    222  CG  TYR    76      -6.283  42.441 -82.718  1.00 72.65           C  
ATOM    223  CD1 TYR    76      -7.368  41.653 -82.407  1.00 72.65           C  
ATOM    224  CD2 TYR    76      -6.387  43.807 -82.565  1.00 72.65           C  
ATOM    225  CE1 TYR    76      -8.538  42.211 -81.953  1.00 72.65           C  
ATOM    226  CE2 TYR    76      -7.559  44.370 -82.111  1.00 72.65           C  
ATOM    227  CZ  TYR    76      -8.637  43.574 -81.805  1.00 72.65           C  
ATOM    228  OH  TYR    76      -9.836  44.153 -81.341  1.00 72.65           O  
ATOM    229  N   GLN    77      -6.169  43.239 -86.058  1.00 82.51           N  
ATOM    230  CA  GLN    77      -6.215  44.486 -86.760  1.00 82.51           C  
ATOM    231  C   GLN    77      -7.280  45.303 -86.107  1.00 82.51           C  
ATOM    232  O   GLN    77      -8.403  44.863 -85.875  1.00 82.51           O  
ATOM    233  CB  GLN    77      -6.585  44.379 -88.255  1.00 82.51           C  
ATOM    234  CG  GLN    77      -5.590  43.595 -89.117  1.00 82.51           C  
ATOM    235  CD  GLN    77      -6.073  42.154 -89.203  1.00 82.51           C  
ATOM    236  NE2 GLN    77      -7.327  41.910 -88.741  1.00 82.51           N  
ATOM    237  OE1 GLN    77      -5.361  41.271 -89.682  1.00 82.51           O  
ATOM    238  N   PRO    78      -6.891  46.498 -85.785  1.00 86.86           N  
ATOM    239  CA  PRO    78      -7.763  47.444 -85.157  1.00 86.86           C  
ATOM    240  C   PRO    78      -8.670  48.068 -86.163  1.00 86.86           C  
ATOM    241  O   PRO    78      -8.318  48.096 -87.341  1.00 86.86           O  
ATOM    242  CB  PRO    78      -6.840  48.434 -84.496  1.00 86.86           C  
ATOM    243  CG  PRO    78      -5.470  48.250 -85.164  1.00 86.86           C  
ATOM    244  CD  PRO    78      -5.485  46.776 -85.559  1.00 86.86           C  
ATOM    245  N   SER    79      -9.847  48.563 -85.733  1.00102.36           N  
ATOM    246  CA  SER    79     -10.708  49.192 -86.692  1.00102.36           C  
ATOM    247  C   SER    79     -11.400  50.349 -86.036  1.00102.36           C  
ATOM    248  O   SER    79     -12.584  50.586 -86.276  1.00102.36           O  
ATOM    249  CB  SER    79     -11.787  48.229 -87.213  1.00102.36           C  
ATOM    250  OG  SER    79     -12.569  47.745 -86.130  1.00102.36           O  
ATOM    251  N   ASN    80     -10.659  51.108 -85.209  1.00 77.09           N  
ATOM    252  CA  ASN    80     -11.116  52.300 -84.541  1.00 77.09           C  
ATOM    253  C   ASN    80     -12.416  52.090 -83.813  1.00 77.09           C  
ATOM    254  O   ASN    80     -13.266  52.980 -83.786  1.00 77.09           O  
ATOM    255  CB  ASN    80     -11.238  53.518 -85.475  1.00 77.09           C  
ATOM    256  CG  ASN    80      -9.829  53.947 -85.873  1.00 77.09           C  
ATOM    257  ND2 ASN    80      -9.426  55.180 -85.466  1.00 77.09           N  
ATOM    258  OD1 ASN    80      -9.104  53.202 -86.529  1.00 77.09           O  
ATOM    259  N   LYS    81     -12.599  50.932 -83.153  1.00 76.67           N  
ATOM    260  CA  LYS    81     -13.831  50.673 -82.450  1.00 76.67           C  
ATOM    261  C   LYS    81     -14.002  51.654 -81.319  1.00 76.67           C  
ATOM    262  O   LYS    81     -15.114  52.058 -80.986  1.00 76.67           O  
ATOM    263  CB  LYS    81     -13.849  49.285 -81.786  1.00 76.67           C  
ATOM    264  CG  LYS    81     -13.709  48.108 -82.752  1.00 76.67           C  
ATOM    265  CD  LYS    81     -13.380  46.797 -82.030  1.00 76.67           C  
ATOM    266  CE  LYS    81     -13.216  45.593 -82.959  1.00 76.67           C  
ATOM    267  NZ  LYS    81     -12.781  44.415 -82.173  1.00 76.67           N1+
ATOM    268  N   LEU    82     -12.889  51.894 -80.608  1.00147.86           N  
ATOM    269  CA  LEU    82     -12.683  52.742 -79.464  1.00147.86           C  
ATOM    270  C   LEU    82     -12.256  54.156 -79.730  1.00147.86           C  
ATOM    271  O   LEU    82     -11.954  54.851 -78.767  1.00147.86           O  
ATOM    272  CB  LEU    82     -11.718  52.131 -78.443  1.00147.86           C  
ATOM    273  CG  LEU    82     -12.341  50.887 -77.783  1.00147.86           C  
ATOM    274  CD1 LEU    82     -11.456  50.352 -76.650  1.00147.86           C  
ATOM    275  CD2 LEU    82     -13.786  51.167 -77.339  1.00147.86           C  
ATOM    276  N   ARG    83     -12.062  54.574 -81.000  1.00 97.28           N  
ATOM    277  CA  ARG    83     -11.428  55.837 -81.303  1.00 97.28           C  
ATOM    278  C   ARG    83     -11.909  56.984 -80.453  1.00 97.28           C  
ATOM    279  O   ARG    83     -13.100  57.287 -80.384  1.00 97.28           O  
ATOM    280  CB  ARG    83     -11.604  56.265 -82.773  1.00 97.28           C  
ATOM    281  CG  ARG    83     -10.742  57.472 -83.138  1.00 97.28           C  
ATOM    282  CD  ARG    83     -10.905  57.990 -84.566  1.00 97.28           C  
ATOM    283  NE  ARG    83      -9.884  59.062 -84.740  1.00 97.28           N  
ATOM    284  CZ  ARG    83      -9.998  59.992 -85.731  1.00 97.28           C  
ATOM    285  NH1 ARG    83     -11.060  59.955 -86.588  1.00 97.28           N1+
ATOM    286  NH2 ARG    83      -9.046  60.964 -85.861  1.00 97.28           N  
ATOM    287  N   GLY    84     -10.945  57.635 -79.759  1.00 36.78           N  
ATOM    288  CA  GLY    84     -11.160  58.832 -78.988  1.00 36.78           C  
ATOM    289  C   GLY    84     -11.666  58.532 -77.608  1.00 36.78           C  
ATOM    290  O   GLY    84     -11.840  59.444 -76.801  1.00 36.78           O  
ATOM    291  N   LYS    85     -11.904  57.252 -77.280  1.00103.85           N  
ATOM    292  CA  LYS    85     -12.450  56.939 -75.991  1.00103.85           C  
ATOM    293  C   LYS    85     -11.370  56.974 -74.949  1.00103.85           C  
ATOM    294  O   LYS    85     -10.213  56.655 -75.211  1.00103.85           O  
ATOM    295  CB  LYS    85     -13.142  55.567 -75.963  1.00103.85           C  
ATOM    296  CG  LYS    85     -14.407  55.541 -76.827  1.00103.85           C  
ATOM    297  CD  LYS    85     -15.457  56.573 -76.407  1.00103.85           C  
ATOM    298  CE  LYS    85     -16.671  56.640 -77.339  1.00103.85           C  
ATOM    299  NZ  LYS    85     -17.626  57.666 -76.859  1.00103.85           N1+
ATOM    300  N   VAL    86     -11.739  57.393 -73.721  1.00105.51           N  
ATOM    301  CA  VAL    86     -10.822  57.476 -72.620  1.00105.51           C  
ATOM    302  C   VAL    86     -11.120  56.355 -71.673  1.00105.51           C  
ATOM    303  O   VAL    86     -12.252  56.194 -71.211  1.00105.51           O  
ATOM    304  CB  VAL    86     -10.916  58.773 -71.882  1.00105.51           C  
ATOM    305  CG1 VAL    86     -10.360  59.893 -72.780  1.00105.51           C  
ATOM    306  CG2 VAL    86     -12.394  58.987 -71.511  1.00105.51           C  
ATOM    307  N   ALA    87     -10.086  55.551 -71.341  1.00 51.02           N  
ATOM    308  CA  ALA    87     -10.326  54.406 -70.508  1.00 51.02           C  
ATOM    309  C   ALA    87      -9.406  54.354 -69.325  1.00 51.02           C  
ATOM    310  O   ALA    87      -8.251  54.778 -69.369  1.00 51.02           O  
ATOM    311  CB  ALA    87     -10.187  53.065 -71.250  1.00 51.02           C  
ATOM    312  N   LEU    88      -9.951  53.834 -68.205  1.00 62.99           N  
ATOM    313  CA  LEU    88      -9.222  53.588 -66.994  1.00 62.99           C  
ATOM    314  C   LEU    88      -9.277  52.108 -66.766  1.00 62.99           C  
ATOM    315  O   LEU    88     -10.359  51.521 -66.731  1.00 62.99           O  
ATOM    316  CB  LEU    88      -9.844  54.247 -65.753  1.00 62.99           C  
ATOM    317  CG  LEU    88      -9.104  53.895 -64.452  1.00 62.99           C  
ATOM    318  CD1 LEU    88      -7.647  54.381 -64.481  1.00 62.99           C  
ATOM    319  CD2 LEU    88      -9.878  54.398 -63.224  1.00 62.99           C  
ATOM    320  N   ILE    89      -8.099  51.463 -66.631  1.00 57.21           N  
ATOM    321  CA  ILE    89      -8.038  50.048 -66.385  1.00 57.21           C  
ATOM    322  C   ILE    89      -7.208  49.802 -65.165  1.00 57.21           C  
ATOM    323  O   ILE    89      -6.038  50.178 -65.109  1.00 57.21           O  
ATOM    324  CB  ILE    89      -7.395  49.279 -67.508  1.00 57.21           C  
ATOM    325  CG1 ILE    89      -7.306  47.779 -67.173  1.00 57.21           C  
ATOM    326  CG2 ILE    89      -6.041  49.929 -67.840  1.00 57.21           C  
ATOM    327  CD1 ILE    89      -7.017  46.900 -68.389  1.00 57.21           C  
ATOM    328  N   THR    90      -7.799  49.155 -64.141  1.00 47.89           N  
ATOM    329  CA  THR    90      -7.020  48.844 -62.982  1.00 47.89           C  
ATOM    330  C   THR    90      -6.382  47.508 -63.208  1.00 47.89           C  
ATOM    331  O   THR    90      -7.048  46.549 -63.594  1.00 47.89           O  
ATOM    332  CB  THR    90      -7.804  48.792 -61.706  1.00 47.89           C  
ATOM    333  CG2 THR    90      -8.436  50.174 -61.472  1.00 47.89           C  
ATOM    334  OG1 THR    90      -8.807  47.789 -61.776  1.00 47.89           O  
ATOM    335  N   GLY    91      -5.063  47.414 -62.946  1.00 39.83           N  
ATOM    336  CA  GLY    91      -4.348  46.184 -63.146  1.00 39.83           C  
ATOM    337  C   GLY    91      -3.957  46.049 -64.597  1.00 39.83           C  
ATOM    338  O   GLY    91      -3.736  44.946 -65.086  1.00 39.83           O  
ATOM    339  N   GLY    92      -3.877  47.180 -65.322  1.00 73.04           N  
ATOM    340  CA  GLY    92      -3.568  47.285 -66.729  1.00 73.04           C  
ATOM    341  C   GLY    92      -2.134  46.968 -67.078  1.00 73.04           C  
ATOM    342  O   GLY    92      -1.796  46.821 -68.251  1.00 73.04           O  
ATOM    343  N   ASP    93      -1.226  47.003 -66.093  1.00 86.38           N  
ATOM    344  CA  ASP    93       0.198  46.894 -66.298  1.00 86.38           C  
ATOM    345  C   ASP    93       0.662  45.564 -66.811  1.00 86.38           C  
ATOM    346  O   ASP    93       1.722  45.499 -67.438  1.00 86.38           O  
ATOM    347  CB  ASP    93       1.007  47.170 -65.019  1.00 86.38           C  
ATOM    348  CG  ASP    93       0.653  46.107 -63.989  1.00 86.38           C  
ATOM    349  OD1 ASP    93      -0.568  45.881 -63.770  1.00 86.38           O  
ATOM    350  OD2 ASP    93       1.597  45.501 -63.415  1.00 86.38           O1-
ATOM    351  N   SER    94      -0.042  44.459 -66.498  1.00 54.66           N  
ATOM    352  CA  SER    94       0.442  43.193 -66.970  1.00 54.66           C  
ATOM    353  C   SER    94      -0.707  42.240 -67.115  1.00 54.66           C  
ATOM    354  O   SER    94      -1.861  42.599 -66.880  1.00 54.66           O  
ATOM    355  CB  SER    94       1.492  42.554 -66.039  1.00 54.66           C  
ATOM    356  OG  SER    94       0.936  42.316 -64.755  1.00 54.66           O  
ATOM    357  N   GLY    95      -0.413  41.007 -67.574  1.00 33.28           N  
ATOM    358  CA  GLY    95      -1.400  39.967 -67.691  1.00 33.28           C  
ATOM    359  C   GLY    95      -2.505  40.392 -68.608  1.00 33.28           C  
ATOM    360  O   GLY    95      -2.284  41.018 -69.643  1.00 33.28           O  
ATOM    361  N   ILE    96      -3.748  40.057 -68.207  1.00 49.10           N  
ATOM    362  CA  ILE    96      -4.923  40.314 -68.988  1.00 49.10           C  
ATOM    363  C   ILE    96      -5.068  41.791 -69.210  1.00 49.10           C  
ATOM    364  O   ILE    96      -5.373  42.221 -70.321  1.00 49.10           O  
ATOM    365  CB  ILE    96      -6.181  39.829 -68.315  1.00 49.10           C  
ATOM    366  CG1 ILE    96      -6.144  38.303 -68.126  1.00 49.10           C  
ATOM    367  CG2 ILE    96      -7.392  40.307 -69.134  1.00 49.10           C  
ATOM    368  CD1 ILE    96      -7.297  37.776 -67.275  1.00 49.10           C  
ATOM    369  N   GLY    97      -4.834  42.608 -68.164  1.00 30.79           N  
ATOM    370  CA  GLY    97      -5.014  44.034 -68.252  1.00 30.79           C  
ATOM    371  C   GLY    97      -4.095  44.596 -69.289  1.00 30.79           C  
ATOM    372  O   GLY    97      -4.433  45.540 -70.000  1.00 30.79           O  
ATOM    373  N   ARG    98      -2.877  44.046 -69.369  1.00184.32           N  
ATOM    374  CA  ARG    98      -1.894  44.485 -70.311  1.00184.32           C  
ATOM    375  C   ARG    98      -2.413  44.254 -71.701  1.00184.32           C  
ATOM    376  O   ARG    98      -2.318  45.131 -72.558  1.00184.32           O  
ATOM    377  CB  ARG    98      -0.612  43.676 -70.071  1.00184.32           C  
ATOM    378  CG  ARG    98       0.613  43.977 -70.920  1.00184.32           C  
ATOM    379  CD  ARG    98       1.794  43.178 -70.374  1.00184.32           C  
ATOM    380  NE  ARG    98       2.943  43.272 -71.303  1.00184.32           N  
ATOM    381  CZ  ARG    98       4.179  43.486 -70.771  1.00184.32           C  
ATOM    382  NH1 ARG    98       4.310  43.979 -69.504  1.00184.32           N1+
ATOM    383  NH2 ARG    98       5.282  43.157 -71.500  1.00184.32           N  
ATOM    384  N   ALA    99      -2.997  43.067 -71.963  1.00 37.12           N  
ATOM    385  CA  ALA    99      -3.514  42.726 -73.266  1.00 37.12           C  
ATOM    386  C   ALA    99      -4.656  43.636 -73.612  1.00 37.12           C  
ATOM    387  O   ALA    99      -4.799  44.064 -74.757  1.00 37.12           O  
ATOM    388  CB  ALA    99      -4.051  41.286 -73.325  1.00 37.12           C  
ATOM    389  N   VAL   100      -5.522  43.931 -72.628  1.00 43.79           N  
ATOM    390  CA  VAL   100      -6.659  44.774 -72.863  1.00 43.79           C  
ATOM    391  C   VAL   100      -6.191  46.154 -73.217  1.00 43.79           C  
ATOM    392  O   VAL   100      -6.683  46.759 -74.167  1.00 43.79           O  
ATOM    393  CB  VAL   100      -7.548  44.886 -71.657  1.00 43.79           C  
ATOM    394  CG1 VAL   100      -8.638  45.934 -71.936  1.00 43.79           C  
ATOM    395  CG2 VAL   100      -8.105  43.488 -71.332  1.00 43.79           C  
ATOM    396  N   GLY   101      -5.195  46.683 -72.481  1.00 37.26           N  
ATOM    397  CA  GLY   101      -4.736  48.026 -72.716  1.00 37.26           C  
ATOM    398  C   GLY   101      -4.224  48.150 -74.123  1.00 37.26           C  
ATOM    399  O   GLY   101      -4.497  49.141 -74.802  1.00 37.26           O  
ATOM    400  N   TYR   102      -3.454  47.152 -74.597  1.00 81.34           N  
ATOM    401  CA  TYR   102      -2.893  47.221 -75.920  1.00 81.34           C  
ATOM    402  C   TYR   102      -3.970  47.155 -76.963  1.00 81.34           C  
ATOM    403  O   TYR   102      -3.929  47.898 -77.940  1.00 81.34           O  
ATOM    404  CB  TYR   102      -1.943  46.075 -76.316  1.00 81.34           C  
ATOM    405  CG  TYR   102      -0.824  45.953 -75.349  1.00 81.34           C  
ATOM    406  CD1 TYR   102      -0.006  47.019 -75.066  1.00 81.34           C  
ATOM    407  CD2 TYR   102      -0.630  44.765 -74.685  1.00 81.34           C  
ATOM    408  CE1 TYR   102       1.016  46.874 -74.158  1.00 81.34           C  
ATOM    409  CE2 TYR   102       0.392  44.619 -73.782  1.00 81.34           C  
ATOM    410  CZ  TYR   102       1.221  45.680 -73.517  1.00 81.34           C  
ATOM    411  OH  TYR   102       2.278  45.552 -72.592  1.00 81.34           O  
ATOM    412  N   CYS   103      -4.951  46.239 -76.802  1.00 74.83           N  
ATOM    413  CA  CYS   103      -5.964  46.061 -77.809  1.00 74.83           C  
ATOM    414  C   CYS   103      -6.771  47.319 -77.918  1.00 74.83           C  
ATOM    415  O   CYS   103      -7.111  47.763 -79.014  1.00 74.83           O  
ATOM    416  CB  CYS   103      -6.927  44.905 -77.495  1.00 74.83           C  
ATOM    417  SG  CYS   103      -8.113  44.630 -78.844  1.00 74.83           S  
ATOM    418  N   PHE   104      -7.093  47.937 -76.771  1.00 77.52           N  
ATOM    419  CA  PHE   104      -7.862  49.146 -76.716  1.00 77.52           C  
ATOM    420  C   PHE   104      -7.109  50.222 -77.438  1.00 77.52           C  
ATOM    421  O   PHE   104      -7.693  51.021 -78.169  1.00 77.52           O  
ATOM    422  CB  PHE   104      -8.125  49.580 -75.262  1.00 77.52           C  
ATOM    423  CG  PHE   104      -9.261  48.752 -74.757  1.00 77.52           C  
ATOM    424  CD1 PHE   104      -9.256  47.382 -74.889  1.00 77.52           C  
ATOM    425  CD2 PHE   104     -10.321  49.347 -74.113  1.00 77.52           C  
ATOM    426  CE1 PHE   104     -10.304  46.626 -74.416  1.00 77.52           C  
ATOM    427  CE2 PHE   104     -11.370  48.599 -73.638  1.00 77.52           C  
ATOM    428  CZ  PHE   104     -11.365  47.233 -73.791  1.00 77.52           C  
ATOM    429  N   ALA   105      -5.784  50.277 -77.245  1.00 43.69           N  
ATOM    430  CA  ALA   105      -4.958  51.255 -77.897  1.00 43.69           C  
ATOM    431  C   ALA   105      -5.013  51.057 -79.386  1.00 43.69           C  
ATOM    432  O   ALA   105      -5.108  52.024 -80.141  1.00 43.69           O  
ATOM    433  CB  ALA   105      -3.480  51.143 -77.486  1.00 43.69           C  
ATOM    434  N   SER   106      -4.968  49.793 -79.859  1.00 60.86           N  
ATOM    435  CA  SER   106      -4.987  49.579 -81.283  1.00 60.86           C  
ATOM    436  C   SER   106      -6.285  50.116 -81.793  1.00 60.86           C  
ATOM    437  O   SER   106      -6.368  50.636 -82.904  1.00 60.86           O  
ATOM    438  CB  SER   106      -4.867  48.101 -81.707  1.00 60.86           C  
ATOM    439  OG  SER   106      -6.019  47.368 -81.317  1.00 60.86           O  
ATOM    440  N   GLU   107      -7.326  50.009 -80.952  1.00137.27           N  
ATOM    441  CA  GLU   107      -8.674  50.422 -81.212  1.00137.27           C  
ATOM    442  C   GLU   107      -8.789  51.921 -81.233  1.00137.27           C  
ATOM    443  O   GLU   107      -9.828  52.447 -81.622  1.00137.27           O  
ATOM    444  CB  GLU   107      -9.667  49.846 -80.193  1.00137.27           C  
ATOM    445  CG  GLU   107      -9.732  48.320 -80.280  1.00137.27           C  
ATOM    446  CD  GLU   107     -10.128  47.965 -81.705  1.00137.27           C  
ATOM    447  OE1 GLU   107     -10.770  48.820 -82.372  1.00137.27           O  
ATOM    448  OE2 GLU   107      -9.791  46.835 -82.149  1.00137.27           O1-
ATOM    449  N   GLY   108      -7.782  52.657 -80.718  1.00 46.88           N  
ATOM    450  CA  GLY   108      -7.830  54.095 -80.817  1.00 46.88           C  
ATOM    451  C   GLY   108      -8.173  54.745 -79.505  1.00 46.88           C  
ATOM    452  O   GLY   108      -8.385  55.956 -79.461  1.00 46.88           O  
ATOM    453  N   ALA   109      -8.268  53.977 -78.405  1.00 55.71           N  
ATOM    454  CA  ALA   109      -8.578  54.578 -77.134  1.00 55.71           C  
ATOM    455  C   ALA   109      -7.337  55.014 -76.397  1.00 55.71           C  
ATOM    456  O   ALA   109      -6.257  54.443 -76.548  1.00 55.71           O  
ATOM    457  CB  ALA   109      -9.355  53.640 -76.193  1.00 55.71           C  
ATOM    458  N   THR   110      -7.476  56.072 -75.565  1.00125.60           N  
ATOM    459  CA  THR   110      -6.394  56.508 -74.720  1.00125.60           C  
ATOM    460  C   THR   110      -6.512  55.747 -73.434  1.00125.60           C  
ATOM    461  O   THR   110      -7.616  55.549 -72.924  1.00125.60           O  
ATOM    462  CB  THR   110      -6.408  57.975 -74.406  1.00125.60           C  
ATOM    463  CG2 THR   110      -6.270  58.770 -75.719  1.00125.60           C  
ATOM    464  OG1 THR   110      -7.611  58.323 -73.739  1.00125.60           O  
ATOM    465  N   VAL   111      -5.383  55.288 -72.846  1.00 85.38           N  
ATOM    466  CA  VAL   111      -5.644  54.504 -71.673  1.00 85.38           C  
ATOM    467  C   VAL   111      -4.860  54.926 -70.465  1.00 85.38           C  
ATOM    468  O   VAL   111      -3.677  55.261 -70.515  1.00 85.38           O  
ATOM    469  CB  VAL   111      -5.523  53.023 -71.847  1.00 85.38           C  
ATOM    470  CG1 VAL   111      -5.925  52.379 -70.508  1.00 85.38           C  
ATOM    471  CG2 VAL   111      -6.415  52.598 -73.027  1.00 85.38           C  
ATOM    472  N   ALA   112      -5.568  54.922 -69.313  1.00 45.90           N  
ATOM    473  CA  ALA   112      -4.980  55.214 -68.037  1.00 45.90           C  
ATOM    474  C   ALA   112      -4.855  53.885 -67.356  1.00 45.90           C  
ATOM    475  O   ALA   112      -5.824  53.126 -67.290  1.00 45.90           O  
ATOM    476  CB  ALA   112      -5.855  56.098 -67.133  1.00 45.90           C  
ATOM    477  N   PHE   113      -3.651  53.568 -66.834  1.00 79.38           N  
ATOM    478  CA  PHE   113      -3.427  52.274 -66.247  1.00 79.38           C  
ATOM    479  C   PHE   113      -3.058  52.398 -64.801  1.00 79.38           C  
ATOM    480  O   PHE   113      -2.061  53.027 -64.456  1.00 79.38           O  
ATOM    481  CB  PHE   113      -2.262  51.525 -66.901  1.00 79.38           C  
ATOM    482  CG  PHE   113      -2.671  51.267 -68.302  1.00 79.38           C  
ATOM    483  CD1 PHE   113      -2.619  52.285 -69.223  1.00 79.38           C  
ATOM    484  CD2 PHE   113      -3.136  50.032 -68.684  1.00 79.38           C  
ATOM    485  CE1 PHE   113      -3.003  52.065 -70.519  1.00 79.38           C  
ATOM    486  CE2 PHE   113      -3.520  49.806 -69.983  1.00 79.38           C  
ATOM    487  CZ  PHE   113      -3.450  50.825 -70.905  1.00 79.38           C  
ATOM    488  N   THR   114      -3.835  51.738 -63.916  1.00126.35           N  
ATOM    489  CA  THR   114      -3.516  51.760 -62.513  1.00126.35           C  
ATOM    490  C   THR   114      -2.916  50.426 -62.169  1.00126.35           C  
ATOM    491  O   THR   114      -3.313  49.394 -62.711  1.00126.35           O  
ATOM    492  CB  THR   114      -4.701  51.968 -61.611  1.00126.35           C  
ATOM    493  CG2 THR   114      -5.412  53.272 -62.006  1.00126.35           C  
ATOM    494  OG1 THR   114      -5.600  50.876 -61.723  1.00126.35           O  
ATOM    495  N   TYR   115      -1.882  50.438 -61.297  1.00161.75           N  
ATOM    496  CA  TYR   115      -1.199  49.242 -60.876  1.00161.75           C  
ATOM    497  C   TYR   115      -0.576  49.493 -59.531  1.00161.75           C  
ATOM    498  O   TYR   115      -0.531  50.631 -59.063  1.00161.75           O  
ATOM    499  CB  TYR   115      -0.105  48.797 -61.869  1.00161.75           C  
ATOM    500  CG  TYR   115       0.857  49.916 -62.113  1.00161.75           C  
ATOM    501  CD1 TYR   115       0.536  50.920 -62.999  1.00161.75           C  
ATOM    502  CD2 TYR   115       2.067  49.975 -61.461  1.00161.75           C  
ATOM    503  CE1 TYR   115       1.406  51.958 -63.238  1.00161.75           C  
ATOM    504  CE2 TYR   115       2.944  51.010 -61.696  1.00161.75           C  
ATOM    505  CZ  TYR   115       2.614  52.004 -62.587  1.00161.75           C  
ATOM    506  OH  TYR   115       3.512  53.065 -62.832  1.00161.75           O  
ATOM    507  N   VAL   116      -0.102  48.422 -58.852  1.00104.28           N  
ATOM    508  CA  VAL   116       0.450  48.595 -57.536  1.00104.28           C  
ATOM    509  C   VAL   116       1.657  49.483 -57.562  1.00104.28           C  
ATOM    510  O   VAL   116       1.532  50.626 -57.133  1.00104.28           O  
ATOM    511  CB  VAL   116       0.843  47.291 -56.912  1.00104.28           C  
ATOM    512  CG1 VAL   116       1.476  47.574 -55.542  1.00104.28           C  
ATOM    513  CG2 VAL   116      -0.406  46.397 -56.850  1.00104.28           C  
ATOM    514  N   LYS   117       2.819  49.005 -58.104  1.00326.22           N  
ATOM    515  CA  LYS   117       4.022  49.815 -58.228  1.00326.22           C  
ATOM    516  C   LYS   117       5.241  48.995 -57.987  1.00326.22           C  
ATOM    517  O   LYS   117       5.241  47.786 -58.119  1.00326.22           O  
ATOM    518  CB  LYS   117       4.187  50.996 -57.242  1.00326.22           C  
ATOM    519  CG  LYS   117       5.028  52.171 -57.756  1.00326.22           C  
ATOM    520  CD  LYS   117       4.861  53.438 -56.911  1.00326.22           C  
ATOM    521  CE  LYS   117       5.507  54.676 -57.534  1.00326.22           C  
ATOM    522  NZ  LYS   117       5.058  55.897 -56.826  1.00326.22           N1+
ATOM    523  N   GLY   118       6.345  49.688 -57.626  1.00 82.03           N  
ATOM    524  CA  GLY   118       7.578  49.027 -57.340  1.00 82.03           C  
ATOM    525  C   GLY   118       8.020  48.385 -58.604  1.00 82.03           C  
ATOM    526  O   GLY   118       8.337  49.053 -59.586  1.00 82.03           O  
ATOM    527  N   GLN   119       8.048  47.045 -58.586  1.00 97.15           N  
ATOM    528  CA  GLN   119       8.439  46.281 -59.728  1.00 97.15           C  
ATOM    529  C   GLN   119       7.445  46.583 -60.790  1.00 97.15           C  
ATOM    530  O   GLN   119       7.761  46.557 -61.979  1.00 97.15           O  
ATOM    531  CB  GLN   119       8.438  44.764 -59.464  1.00 97.15           C  
ATOM    532  CG  GLN   119       7.070  44.156 -59.150  1.00 97.15           C  
ATOM    533  CD  GLN   119       7.294  42.666 -58.924  1.00 97.15           C  
ATOM    534  NE2 GLN   119       8.590  42.251 -58.922  1.00 97.15           N  
ATOM    535  OE1 GLN   119       6.351  41.893 -58.759  1.00 97.15           O  
ATOM    536  N   GLU   120       6.204  46.912 -60.380  1.00156.56           N  
ATOM    537  CA  GLU   120       5.156  47.099 -61.309  1.00156.56           C  
ATOM    538  C   GLU   120       5.554  48.168 -62.270  1.00156.56           C  
ATOM    539  O   GLU   120       5.036  48.220 -63.382  1.00156.56           O  
ATOM    540  CB  GLU   120       3.859  47.532 -60.614  1.00156.56           C  
ATOM    541  CG  GLU   120       3.333  46.484 -59.627  1.00156.56           C  
ATOM    542  CD  GLU   120       2.450  45.498 -60.378  1.00156.56           C  
ATOM    543  OE1 GLU   120       2.944  44.859 -61.346  1.00156.56           O  
ATOM    544  OE2 GLU   120       1.260  45.372 -59.985  1.00156.56           O1-
ATOM    545  N   GLU   121       6.533  49.007 -61.895  1.00 77.32           N  
ATOM    546  CA  GLU   121       6.941  50.076 -62.757  1.00 77.32           C  
ATOM    547  C   GLU   121       7.523  49.513 -64.009  1.00 77.32           C  
ATOM    548  O   GLU   121       7.268  50.021 -65.100  1.00 77.32           O  
ATOM    549  CB  GLU   121       7.990  50.992 -62.108  1.00 77.32           C  
ATOM    550  CG  GLU   121       7.381  51.927 -61.068  1.00 77.32           C  
ATOM    551  CD  GLU   121       6.582  52.969 -61.835  1.00 77.32           C  
ATOM    552  OE1 GLU   121       6.731  53.022 -63.086  1.00 77.32           O  
ATOM    553  OE2 GLU   121       5.813  53.726 -61.187  1.00 77.32           O1-
ATOM    554  N   LYS   122       8.324  48.441 -63.896  1.00 67.79           N  
ATOM    555  CA  LYS   122       8.953  47.923 -65.071  1.00 67.79           C  
ATOM    556  C   LYS   122       7.902  47.438 -66.024  1.00 67.79           C  
ATOM    557  O   LYS   122       7.919  47.779 -67.206  1.00 67.79           O  
ATOM    558  CB  LYS   122       9.886  46.745 -64.763  1.00 67.79           C  
ATOM    559  CG  LYS   122      11.039  47.119 -63.826  1.00 67.79           C  
ATOM    560  CD  LYS   122      10.586  47.409 -62.393  1.00 67.79           C  
ATOM    561  CE  LYS   122      11.728  47.776 -61.442  1.00 67.79           C  
ATOM    562  NZ  LYS   122      11.189  48.034 -60.087  1.00 67.79           N1+
ATOM    563  N   ASP   123       6.937  46.642 -65.528  1.00 46.19           N  
ATOM    564  CA  ASP   123       5.926  46.085 -66.384  1.00 46.19           C  
ATOM    565  C   ASP   123       5.089  47.190 -66.938  1.00 46.19           C  
ATOM    566  O   ASP   123       4.737  47.195 -68.117  1.00 46.19           O  
ATOM    567  CB  ASP   123       4.969  45.148 -65.630  1.00 46.19           C  
ATOM    568  CG  ASP   123       5.746  43.929 -65.158  1.00 46.19           C  
ATOM    569  OD1 ASP   123       6.972  43.862 -65.425  1.00 46.19           O  
ATOM    570  OD2 ASP   123       5.120  43.047 -64.514  1.00 46.19           O1-
ATOM    571  N   ALA   124       4.746  48.168 -66.081  1.00 31.12           N  
ATOM    572  CA  ALA   124       3.883  49.233 -66.498  1.00 31.12           C  
ATOM    573  C   ALA   124       4.543  50.005 -67.589  1.00 31.12           C  
ATOM    574  O   ALA   124       3.907  50.340 -68.585  1.00 31.12           O  
ATOM    575  CB  ALA   124       3.559  50.226 -65.368  1.00 31.12           C  
ATOM    576  N   GLN   125       5.849  50.286 -67.454  0.60 30.72           N  
ATOM    577  CA  GLN   125       6.491  51.104 -68.440  0.60 30.72           C  
ATOM    578  C   GLN   125       6.448  50.418 -69.767  0.60 30.72           C  
ATOM    579  O   GLN   125       6.189  51.057 -70.788  0.60 30.72           O  
ATOM    580  CB  GLN   125       7.954  51.426 -68.098  0.60 30.72           C  
ATOM    581  CG  GLN   125       8.877  50.207 -68.052  0.60 30.72           C  
ATOM    582  CD  GLN   125      10.264  50.717 -67.692  1.00 30.72           C  
ATOM    583  NE2 GLN   125      11.203  49.777 -67.404  1.00 30.72           N  
ATOM    584  OE1 GLN   125      10.504  51.923 -67.663  1.00 30.72           O  
ATOM    585  N   GLU   126       6.682  49.095 -69.796  0.50 41.27           N  
ATOM    586  CA  GLU   126       6.693  48.404 -71.053  0.50 41.27           C  
ATOM    587  C   GLU   126       5.336  48.461 -71.676  0.50 41.27           C  
ATOM    588  O   GLU   126       5.208  48.692 -72.876  0.50 41.27           O  
ATOM    589  CB  GLU   126       7.074  46.923 -70.941  0.50 41.27           C  
ATOM    590  CG  GLU   126       7.163  46.254 -72.311  0.50 41.27           C  
ATOM    591  CD  GLU   126       7.541  44.798 -72.111  0.50 41.27           C  
ATOM    592  OE1 GLU   126       8.038  44.461 -71.003  0.50 41.27           O  
ATOM    593  OE2 GLU   126       7.332  43.999 -73.064  0.50 41.27           O1-
ATOM    594  N   THR   127       4.273  48.268 -70.872  1.00132.59           N  
ATOM    595  CA  THR   127       2.956  48.269 -71.438  1.00132.59           C  
ATOM    596  C   THR   127       2.706  49.616 -72.036  1.00132.59           C  
ATOM    597  O   THR   127       2.108  49.724 -73.105  1.00132.59           O  
ATOM    598  CB  THR   127       1.881  47.908 -70.454  1.00132.59           C  
ATOM    599  CG2 THR   127       2.135  46.476 -69.968  1.00132.59           C  
ATOM    600  OG1 THR   127       1.889  48.789 -69.349  1.00132.59           O  
ATOM    601  N   LEU   128       3.189  50.686 -71.380  1.00107.06           N  
ATOM    602  CA  LEU   128       2.985  52.002 -71.912  1.00107.06           C  
ATOM    603  C   LEU   128       3.644  52.146 -73.249  1.00107.06           C  
ATOM    604  O   LEU   128       3.104  52.803 -74.138  1.00107.06           O  
ATOM    605  CB  LEU   128       3.442  53.137 -70.980  1.00107.06           C  
ATOM    606  CG  LEU   128       2.400  53.485 -69.891  1.00107.06           C  
ATOM    607  CD1 LEU   128       2.025  52.272 -69.030  1.00107.06           C  
ATOM    608  CD2 LEU   128       2.862  54.684 -69.049  1.00107.06           C  
ATOM    609  N   GLN   129       4.827  51.541 -73.451  0.50118.00           N  
ATOM    610  CA  GLN   129       5.477  51.720 -74.719  0.50118.00           C  
ATOM    611  C   GLN   129       4.641  51.112 -75.812  0.50118.00           C  
ATOM    612  O   GLN   129       4.524  51.688 -76.892  0.50118.00           O  
ATOM    613  CB  GLN   129       6.888  51.110 -74.779  0.50118.00           C  
ATOM    614  CG  GLN   129       7.599  51.394 -76.101  0.50118.00           C  
ATOM    615  CD  GLN   129       7.763  52.904 -76.230  0.50118.00           C  
ATOM    616  NE2 GLN   129       9.028  53.363 -76.432  0.50118.00           N  
ATOM    617  OE1 GLN   129       6.794  53.657 -76.152  0.50118.00           O  
ATOM    618  N   MET   130       4.036  49.931 -75.571  1.00107.21           N  
ATOM    619  CA  MET   130       3.242  49.301 -76.594  1.00107.21           C  
ATOM    620  C   MET   130       2.019  50.113 -76.889  1.00107.21           C  
ATOM    621  O   MET   130       1.585  50.200 -78.036  1.00107.21           O  
ATOM    622  CB  MET   130       2.799  47.875 -76.254  1.00107.21           C  
ATOM    623  CG  MET   130       3.957  46.883 -76.195  1.00107.21           C  
ATOM    624  SD  MET   130       4.784  46.634 -77.793  1.00107.21           S  
ATOM    625  CE  MET   130       6.027  45.460 -77.179  1.00107.21           C  
ATOM    626  N   LEU   131       1.410  50.714 -75.851  1.00149.44           N  
ATOM    627  CA  LEU   131       0.216  51.496 -76.028  1.00149.44           C  
ATOM    628  C   LEU   131       0.531  52.693 -76.871  1.00149.44           C  
ATOM    629  O   LEU   131      -0.190  53.015 -77.815  1.00149.44           O  
ATOM    630  CB  LEU   131      -0.284  51.993 -74.671  1.00149.44           C  
ATOM    631  CG  LEU   131      -0.546  50.810 -73.729  1.00149.44           C  
ATOM    632  CD1 LEU   131      -0.812  51.280 -72.298  1.00149.44           C  
ATOM    633  CD2 LEU   131      -1.667  49.910 -74.273  1.00149.44           C  
ATOM    634  N   LYS   132       1.655  53.358 -76.552  1.00123.25           N  
ATOM    635  CA  LYS   132       2.111  54.560 -77.189  1.00123.25           C  
ATOM    636  C   LYS   132       2.424  54.271 -78.622  1.00123.25           C  
ATOM    637  O   LYS   132       2.286  55.136 -79.485  1.00123.25           O  
ATOM    638  CB  LYS   132       3.392  55.105 -76.537  1.00123.25           C  
ATOM    639  CG  LYS   132       3.905  56.410 -77.148  1.00123.25           C  
ATOM    640  CD  LYS   132       5.068  57.019 -76.362  1.00123.25           C  
ATOM    641  CE  LYS   132       4.637  57.885 -75.178  1.00123.25           C  
ATOM    642  NZ  LYS   132       4.219  59.221 -75.657  1.00123.25           N1+
ATOM    643  N   GLU   133       2.857  53.035 -78.918  1.00 55.91           N  
ATOM    644  CA  GLU   133       3.222  52.679 -80.258  1.00 55.91           C  
ATOM    645  C   GLU   133       2.050  52.933 -81.158  1.00 55.91           C  
ATOM    646  O   GLU   133       2.219  53.464 -82.254  1.00 55.91           O  
ATOM    647  CB  GLU   133       3.535  51.177 -80.409  1.00 55.91           C  
ATOM    648  CG  GLU   133       4.820  50.677 -79.740  1.00 55.91           C  
ATOM    649  CD  GLU   133       4.853  49.165 -79.945  1.00 55.91           C  
ATOM    650  OE1 GLU   133       3.806  48.616 -80.384  1.00 55.91           O  
ATOM    651  OE2 GLU   133       5.911  48.539 -79.669  1.00 55.91           O1-
ATOM    652  N   VAL   134       0.819  52.587 -80.728  1.00190.89           N  
ATOM    653  CA  VAL   134      -0.259  52.739 -81.667  1.00190.89           C  
ATOM    654  C   VAL   134      -0.726  54.156 -81.680  1.00190.89           C  
ATOM    655  O   VAL   134      -1.921  54.443 -81.718  1.00190.89           O  
ATOM    656  CB  VAL   134      -1.435  51.845 -81.386  1.00190.89           C  
ATOM    657  CG1 VAL   134      -2.100  52.264 -80.063  1.00190.89           C  
ATOM    658  CG2 VAL   134      -2.370  51.880 -82.609  1.00190.89           C  
ATOM    659  N   LYS   135       0.223  55.099 -81.763  1.00221.38           N  
ATOM    660  CA  LYS   135      -0.164  56.475 -81.818  1.00221.38           C  
ATOM    661  C   LYS   135      -0.974  56.618 -83.065  1.00221.38           C  
ATOM    662  O   LYS   135      -2.039  57.232 -83.041  1.00221.38           O  
ATOM    663  CB  LYS   135       1.026  57.436 -82.011  1.00221.38           C  
ATOM    664  CG  LYS   135       2.021  57.492 -80.854  1.00221.38           C  
ATOM    665  CD  LYS   135       3.352  58.141 -81.241  1.00221.38           C  
ATOM    666  CE  LYS   135       4.347  58.256 -80.081  1.00221.38           C  
ATOM    667  NZ  LYS   135       4.970  56.943 -79.805  1.00221.38           N1+
ATOM    668  N   THR   136      -0.511  55.971 -84.160  1.00276.13           N  
ATOM    669  CA  THR   136      -1.108  56.095 -85.462  1.00276.13           C  
ATOM    670  C   THR   136      -2.579  55.919 -85.365  1.00276.13           C  
ATOM    671  O   THR   136      -3.074  54.938 -84.814  1.00276.13           O  
ATOM    672  CB  THR   136      -0.599  55.110 -86.473  1.00276.13           C  
ATOM    673  CG2 THR   136      -0.929  53.685 -85.995  1.00276.13           C  
ATOM    674  OG1 THR   136      -1.203  55.358 -87.734  1.00276.13           O  
ATOM    675  N   SER   137      -3.296  56.909 -85.931  1.00261.88           N  
ATOM    676  CA  SER   137      -4.721  57.018 -85.866  1.00261.88           C  
ATOM    677  C   SER   137      -5.059  57.186 -84.423  1.00261.88           C  
ATOM    678  O   SER   137      -4.880  56.259 -83.634  1.00261.88           O  
ATOM    679  CB  SER   137      -5.457  55.790 -86.427  1.00261.88           C  
ATOM    680  OG  SER   137      -6.860  55.978 -86.320  1.00261.88           O  
ATOM    681  N   ASP   138      -5.617  58.367 -84.066  1.00254.36           N  
ATOM    682  CA  ASP   138      -5.887  58.706 -82.695  1.00254.36           C  
ATOM    683  C   ASP   138      -4.772  58.277 -81.819  1.00254.36           C  
ATOM    684  O   ASP   138      -4.818  57.178 -81.265  1.00254.36           O  
ATOM    685  CB  ASP   138      -7.219  58.211 -82.115  1.00254.36           C  
ATOM    686  CG  ASP   138      -8.224  59.304 -82.419  1.00254.36           C  
ATOM    687  OD1 ASP   138      -7.917  60.153 -83.299  1.00254.36           O  
ATOM    688  OD2 ASP   138      -9.291  59.334 -81.752  1.00254.36           O1-
ATOM    689  N   SER   139      -3.738  59.147 -81.714  1.00174.25           N  
ATOM    690  CA  SER   139      -2.539  58.905 -80.961  1.00174.25           C  
ATOM    691  C   SER   139      -2.932  58.305 -79.665  1.00174.25           C  
ATOM    692  O   SER   139      -3.980  58.635 -79.111  1.00174.25           O  
ATOM    693  CB  SER   139      -1.726  60.174 -80.663  1.00174.25           C  
ATOM    694  OG  SER   139      -1.300  60.780 -81.873  1.00174.25           O  
ATOM    695  N   LYS   140      -2.122  57.355 -79.173  1.00171.18           N  
ATOM    696  CA  LYS   140      -2.556  56.743 -77.974  1.00171.18           C  
ATOM    697  C   LYS   140      -1.915  57.432 -76.823  1.00171.18           C  
ATOM    698  O   LYS   140      -0.695  57.411 -76.681  1.00171.18           O  
ATOM    699  CB  LYS   140      -2.152  55.257 -77.937  1.00171.18           C  
ATOM    700  CG  LYS   140      -2.837  54.386 -76.881  1.00171.18           C  
ATOM    701  CD  LYS   140      -2.481  54.701 -75.428  1.00171.18           C  
ATOM    702  CE  LYS   140      -3.075  53.676 -74.455  1.00171.18           C  
ATOM    703  NZ  LYS   140      -2.674  53.982 -73.062  1.00171.18           N1+
ATOM    704  N   GLU   141      -2.739  58.065 -75.963  1.00110.66           N  
ATOM    705  CA  GLU   141      -2.219  58.717 -74.797  1.00110.66           C  
ATOM    706  C   GLU   141      -2.257  57.700 -73.699  1.00110.66           C  
ATOM    707  O   GLU   141      -3.270  57.029 -73.495  1.00110.66           O  
ATOM    708  CB  GLU   141      -3.082  59.908 -74.349  1.00110.66           C  
ATOM    709  CG  GLU   141      -3.212  60.997 -75.419  1.00110.66           C  
ATOM    710  CD  GLU   141      -1.866  61.687 -75.564  1.00110.66           C  
ATOM    711  OE1 GLU   141      -1.258  62.017 -74.512  1.00110.66           O  
ATOM    712  OE2 GLU   141      -1.425  61.890 -76.727  1.00110.66           O1-
ATOM    713  N   PRO   142      -1.129  57.459 -73.090  1.00107.32           N  
ATOM    714  CA  PRO   142      -1.146  56.574 -71.953  1.00107.32           C  
ATOM    715  C   PRO   142      -0.861  57.320 -70.687  1.00107.32           C  
ATOM    716  O   PRO   142      -0.057  58.251 -70.726  1.00107.32           O  
ATOM    717  CB  PRO   142      -0.090  55.506 -72.226  1.00107.32           C  
ATOM    718  CG  PRO   142       0.908  56.218 -73.150  1.00107.32           C  
ATOM    719  CD  PRO   142       0.030  57.205 -73.933  1.00107.32           C  
ATOM    720  N   ILE   143      -1.443  56.896 -69.548  1.00 92.79           N  
ATOM    721  CA  ILE   143      -1.092  57.505 -68.296  1.00 92.79           C  
ATOM    722  C   ILE   143      -0.921  56.393 -67.305  1.00 92.79           C  
ATOM    723  O   ILE   143      -1.739  55.477 -67.241  1.00 92.79           O  
ATOM    724  CB  ILE   143      -2.113  58.467 -67.761  1.00 92.79           C  
ATOM    725  CG1 ILE   143      -1.515  59.291 -66.607  1.00 92.79           C  
ATOM    726  CG2 ILE   143      -3.372  57.676 -67.377  1.00 92.79           C  
ATOM    727  CD1 ILE   143      -2.389  60.478 -66.207  1.00 92.79           C  
ATOM    728  N   ALA   144       0.161  56.442 -66.502  1.00 43.54           N  
ATOM    729  CA  ALA   144       0.399  55.388 -65.556  1.00 43.54           C  
ATOM    730  C   ALA   144       0.102  55.901 -64.183  1.00 43.54           C  
ATOM    731  O   ALA   144       0.530  56.994 -63.813  1.00 43.54           O  
ATOM    732  CB  ALA   144       1.851  54.886 -65.547  1.00 43.54           C  
ATOM    733  N   ILE   145      -0.685  55.136 -63.397  1.00145.99           N  
ATOM    734  CA  ILE   145      -0.941  55.579 -62.059  1.00145.99           C  
ATOM    735  C   ILE   145      -0.750  54.467 -61.065  1.00145.99           C  
ATOM    736  O   ILE   145      -1.582  53.580 -60.872  1.00145.99           O  
ATOM    737  CB  ILE   145      -2.256  56.278 -61.941  1.00145.99           C  
ATOM    738  CG1 ILE   145      -3.398  55.393 -62.427  1.00145.99           C  
ATOM    739  CG2 ILE   145      -2.134  57.605 -62.712  1.00145.99           C  
ATOM    740  CD1 ILE   145      -4.729  56.120 -62.327  1.00145.99           C  
ATOM    741  N   PRO   146       0.379  54.532 -60.414  1.00 93.46           N  
ATOM    742  CA  PRO   146       0.727  53.552 -59.418  1.00 93.46           C  
ATOM    743  C   PRO   146       0.062  53.891 -58.125  1.00 93.46           C  
ATOM    744  O   PRO   146      -0.328  55.043 -57.976  1.00 93.46           O  
ATOM    745  CB  PRO   146       2.255  53.564 -59.328  1.00 93.46           C  
ATOM    746  CG  PRO   146       2.675  54.884 -59.999  1.00 93.46           C  
ATOM    747  CD  PRO   146       1.553  55.143 -61.015  1.00 93.46           C  
ATOM    748  N   THR   147      -0.140  52.897 -57.229  1.00156.08           N  
ATOM    749  CA  THR   147      -0.629  53.064 -55.879  1.00156.08           C  
ATOM    750  C   THR   147      -1.357  51.838 -55.439  1.00156.08           C  
ATOM    751  O   THR   147      -1.618  50.925 -56.221  1.00156.08           O  
ATOM    752  CB  THR   147      -1.546  54.227 -55.576  1.00156.08           C  
ATOM    753  CG2 THR   147      -0.764  55.534 -55.344  1.00156.08           C  
ATOM    754  OG1 THR   147      -2.564  54.335 -56.559  1.00156.08           O  
ATOM    755  N   ASP   148      -1.723  51.819 -54.140  1.00 49.40           N  
ATOM    756  CA  ASP   148      -2.405  50.704 -53.553  1.00 49.40           C  
ATOM    757  C   ASP   148      -3.869  51.032 -53.515  1.00 49.40           C  
ATOM    758  O   ASP   148      -4.300  51.959 -52.831  1.00 49.40           O  
ATOM    759  CB  ASP   148      -1.932  50.399 -52.118  1.00 49.40           C  
ATOM    760  CG  ASP   148      -2.435  49.019 -51.709  1.00 49.40           C  
ATOM    761  OD1 ASP   148      -3.565  48.647 -52.124  1.00 49.40           O  
ATOM    762  OD2 ASP   148      -1.686  48.313 -50.981  1.00 49.40           O1-
ATOM    763  N   LEU   149      -4.652  50.263 -54.294  1.00102.22           N  
ATOM    764  CA  LEU   149      -6.078  50.350 -54.464  1.00102.22           C  
ATOM    765  C   LEU   149      -6.836  49.858 -53.262  1.00102.22           C  
ATOM    766  O   LEU   149      -8.063  49.947 -53.215  1.00102.22           O  
ATOM    767  CB  LEU   149      -6.595  49.695 -55.752  1.00102.22           C  
ATOM    768  CG  LEU   149      -6.195  50.520 -56.994  1.00102.22           C  
ATOM    769  CD1 LEU   149      -6.843  49.963 -58.271  1.00102.22           C  
ATOM    770  CD2 LEU   149      -6.488  52.017 -56.789  1.00102.22           C  
ATOM    771  N   GLY   150      -6.143  49.203 -52.320  1.00 47.72           N  
ATOM    772  CA  GLY   150      -6.750  48.759 -51.096  1.00 47.72           C  
ATOM    773  C   GLY   150      -7.234  49.973 -50.352  1.00 47.72           C  
ATOM    774  O   GLY   150      -8.122  49.875 -49.505  1.00 47.72           O  
ATOM    775  N   PHE   151      -6.600  51.139 -50.594  1.00102.94           N  
ATOM    776  CA  PHE   151      -6.941  52.371 -49.926  1.00102.94           C  
ATOM    777  C   PHE   151      -8.040  53.065 -50.691  1.00102.94           C  
ATOM    778  O   PHE   151      -7.933  53.295 -51.893  1.00102.94           O  
ATOM    779  CB  PHE   151      -5.748  53.341 -49.871  1.00102.94           C  
ATOM    780  CG  PHE   151      -4.644  52.646 -49.145  1.00102.94           C  
ATOM    781  CD1 PHE   151      -3.803  51.781 -49.807  1.00102.94           C  
ATOM    782  CD2 PHE   151      -4.453  52.865 -47.802  1.00102.94           C  
ATOM    783  CE1 PHE   151      -2.784  51.141 -49.137  1.00102.94           C  
ATOM    784  CE2 PHE   151      -3.436  52.230 -47.128  1.00102.94           C  
ATOM    785  CZ  PHE   151      -2.601  51.367 -47.795  1.00102.94           C  
ATOM    786  N   ASP   152      -9.118  53.456 -49.978  1.00 85.12           N  
ATOM    787  CA  ASP   152     -10.305  54.063 -50.525  1.00 85.12           C  
ATOM    788  C   ASP   152      -9.981  55.365 -51.206  1.00 85.12           C  
ATOM    789  O   ASP   152     -10.446  55.626 -52.315  1.00 85.12           O  
ATOM    790  CB  ASP   152     -11.324  54.350 -49.400  1.00 85.12           C  
ATOM    791  CG  ASP   152     -12.671  54.801 -49.949  1.00 85.12           C  
ATOM    792  OD1 ASP   152     -12.719  55.356 -51.078  1.00 85.12           O  
ATOM    793  OD2 ASP   152     -13.681  54.597 -49.224  1.00 85.12           O1-
ATOM    794  N   GLU   153      -9.158  56.221 -50.575  1.00100.63           N  
ATOM    795  CA  GLU   153      -8.876  57.511 -51.144  1.00100.63           C  
ATOM    796  C   GLU   153      -8.177  57.357 -52.452  1.00100.63           C  
ATOM    797  O   GLU   153      -8.449  58.093 -53.400  1.00100.63           O  
ATOM    798  CB  GLU   153      -7.988  58.396 -50.256  1.00100.63           C  
ATOM    799  CG  GLU   153      -8.764  59.088 -49.138  1.00100.63           C  
ATOM    800  CD  GLU   153      -9.723  60.062 -49.815  1.00100.63           C  
ATOM    801  OE1 GLU   153     -10.751  59.590 -50.371  1.00100.63           O  
ATOM    802  OE2 GLU   153      -9.435  61.288 -49.794  1.00100.63           O1-
ATOM    803  N   ASN   154      -7.255  56.386 -52.535  1.00 68.00           N  
ATOM    804  CA  ASN   154      -6.485  56.183 -53.725  1.00 68.00           C  
ATOM    805  C   ASN   154      -7.404  55.793 -54.843  1.00 68.00           C  
ATOM    806  O   ASN   154      -7.188  56.179 -55.991  1.00 68.00           O  
ATOM    807  CB  ASN   154      -5.412  55.099 -53.544  1.00 68.00           C  
ATOM    808  CG  ASN   154      -4.438  55.633 -52.502  1.00 68.00           C  
ATOM    809  ND2 ASN   154      -3.482  54.773 -52.053  1.00 68.00           N  
ATOM    810  OD1 ASN   154      -4.525  56.790 -52.097  1.00 68.00           O  
ATOM    811  N   CYS   155      -8.463  55.016 -54.543  1.00 33.83           N  
ATOM    812  CA  CYS   155      -9.387  54.614 -55.569  1.00 33.83           C  
ATOM    813  C   CYS   155     -10.028  55.847 -56.133  1.00 33.83           C  
ATOM    814  O   CYS   155     -10.309  55.923 -57.326  1.00 33.83           O  
ATOM    815  CB  CYS   155     -10.504  53.674 -55.073  1.00 33.83           C  
ATOM    816  SG  CYS   155      -9.897  52.009 -54.654  1.00 33.83           S  
ATOM    817  N   LYS   156     -10.323  56.841 -55.280  1.00 78.54           N  
ATOM    818  CA  LYS   156     -10.897  58.064 -55.763  1.00 78.54           C  
ATOM    819  C   LYS   156      -9.895  58.813 -56.594  1.00 78.54           C  
ATOM    820  O   LYS   156     -10.233  59.353 -57.646  1.00 78.54           O  
ATOM    821  CB  LYS   156     -11.327  58.996 -54.622  1.00 78.54           C  
ATOM    822  CG  LYS   156     -12.594  58.520 -53.920  1.00 78.54           C  
ATOM    823  CD  LYS   156     -12.791  59.154 -52.545  1.00 78.54           C  
ATOM    824  CE  LYS   156     -14.213  59.001 -52.001  1.00 78.54           C  
ATOM    825  NZ  LYS   156     -14.733  57.649 -52.303  1.00 78.54           N1+
ATOM    826  N   ARG   157      -8.623  58.843 -56.152  1.00 68.81           N  
ATOM    827  CA  ARG   157      -7.612  59.640 -56.795  1.00 68.81           C  
ATOM    828  C   ARG   157      -7.395  59.222 -58.216  1.00 68.81           C  
ATOM    829  O   ARG   157      -7.254  60.068 -59.097  1.00 68.81           O  
ATOM    830  CB  ARG   157      -6.223  59.549 -56.133  1.00 68.81           C  
ATOM    831  CG  ARG   157      -6.040  60.388 -54.867  1.00 68.81           C  
ATOM    832  CD  ARG   157      -4.564  60.505 -54.473  1.00 68.81           C  
ATOM    833  NE  ARG   157      -4.436  61.536 -53.405  1.00 68.81           N  
ATOM    834  CZ  ARG   157      -3.199  62.006 -53.070  1.00 68.81           C  
ATOM    835  NH1 ARG   157      -2.090  61.505 -53.687  1.00 68.81           N1+
ATOM    836  NH2 ARG   157      -3.067  62.981 -52.124  1.00 68.81           N  
ATOM    837  N   VAL   158      -7.356  57.906 -58.481  1.00115.27           N  
ATOM    838  CA  VAL   158      -7.079  57.407 -59.800  1.00115.27           C  
ATOM    839  C   VAL   158      -8.107  57.883 -60.773  1.00115.27           C  
ATOM    840  O   VAL   158      -7.790  58.188 -61.924  1.00115.27           O  
ATOM    841  CB  VAL   158      -7.061  55.904 -59.837  1.00115.27           C  
ATOM    842  CG1 VAL   158      -8.120  55.388 -58.862  1.00115.27           C  
ATOM    843  CG2 VAL   158      -7.379  55.451 -61.267  1.00115.27           C  
ATOM    844  N   VAL   159      -9.383  57.909 -60.359  1.00 39.80           N  
ATOM    845  CA  VAL   159     -10.410  58.352 -61.254  1.00 39.80           C  
ATOM    846  C   VAL   159     -10.227  59.815 -61.525  1.00 39.80           C  
ATOM    847  O   VAL   159     -10.312  60.266 -62.665  1.00 39.80           O  
ATOM    848  CB  VAL   159     -11.792  58.129 -60.720  1.00 39.80           C  
ATOM    849  CG1 VAL   159     -12.794  58.732 -61.715  1.00 39.80           C  
ATOM    850  CG2 VAL   159     -11.984  56.615 -60.499  1.00 39.80           C  
ATOM    851  N   ASP   160      -9.940  60.599 -60.473  1.00 65.41           N  
ATOM    852  CA  ASP   160      -9.814  62.021 -60.616  1.00 65.41           C  
ATOM    853  C   ASP   160      -8.666  62.304 -61.536  1.00 65.41           C  
ATOM    854  O   ASP   160      -8.738  63.185 -62.393  1.00 65.41           O  
ATOM    855  CB  ASP   160      -9.532  62.694 -59.262  1.00 65.41           C  
ATOM    856  CG  ASP   160      -9.853  64.174 -59.376  1.00 65.41           C  
ATOM    857  OD1 ASP   160      -9.932  64.680 -60.527  1.00 65.41           O  
ATOM    858  OD2 ASP   160     -10.028  64.818 -58.307  1.00 65.41           O1-
ATOM    859  N   GLU   161      -7.571  61.539 -61.374  1.00101.59           N  
ATOM    860  CA  GLU   161      -6.368  61.701 -62.137  1.00101.59           C  
ATOM    861  C   GLU   161      -6.629  61.379 -63.575  1.00101.59           C  
ATOM    862  O   GLU   161      -6.120  62.052 -64.471  1.00101.59           O  
ATOM    863  CB  GLU   161      -5.261  60.740 -61.672  1.00101.59           C  
ATOM    864  CG  GLU   161      -4.820  60.969 -60.226  1.00101.59           C  
ATOM    865  CD  GLU   161      -3.989  62.240 -60.189  1.00101.59           C  
ATOM    866  OE1 GLU   161      -3.738  62.807 -61.287  1.00101.59           O  
ATOM    867  OE2 GLU   161      -3.594  62.663 -59.071  1.00101.59           O1-
ATOM    868  N   VAL   162      -7.419  60.322 -63.847  1.00101.78           N  
ATOM    869  CA  VAL   162      -7.621  59.953 -65.220  1.00101.78           C  
ATOM    870  C   VAL   162      -8.343  61.055 -65.934  1.00101.78           C  
ATOM    871  O   VAL   162      -7.991  61.404 -67.059  1.00101.78           O  
ATOM    872  CB  VAL   162      -8.384  58.670 -65.420  1.00101.78           C  
ATOM    873  CG1 VAL   162      -7.608  57.532 -64.734  1.00101.78           C  
ATOM    874  CG2 VAL   162      -9.835  58.841 -64.950  1.00101.78           C  
ATOM    875  N   VAL   163      -9.370  61.642 -65.291  1.00 32.52           N  
ATOM    876  CA  VAL   163     -10.137  62.686 -65.911  1.00 32.52           C  
ATOM    877  C   VAL   163      -9.251  63.865 -66.143  1.00 32.52           C  
ATOM    878  O   VAL   163      -9.336  64.537 -67.168  1.00 32.52           O  
ATOM    879  CB  VAL   163     -11.292  63.140 -65.069  1.00 32.52           C  
ATOM    880  CG1 VAL   163     -11.992  64.306 -65.789  1.00 32.52           C  
ATOM    881  CG2 VAL   163     -12.205  61.931 -64.800  1.00 32.52           C  
ATOM    882  N   ASN   164      -8.364  64.154 -65.176  1.00 71.06           N  
ATOM    883  CA  ASN   164      -7.520  65.299 -65.304  1.00 71.06           C  
ATOM    884  C   ASN   164      -6.671  65.154 -66.533  1.00 71.06           C  
ATOM    885  O   ASN   164      -6.642  66.042 -67.382  1.00 71.06           O  
ATOM    886  CB  ASN   164      -6.587  65.425 -64.089  1.00 71.06           C  
ATOM    887  CG  ASN   164      -5.957  66.805 -64.110  1.00 71.06           C  
ATOM    888  ND2 ASN   164      -6.014  67.512 -62.949  1.00 71.06           N  
ATOM    889  OD1 ASN   164      -5.435  67.247 -65.131  1.00 71.06           O  
ATOM    890  N   ALA   165      -5.945  64.025 -66.652  1.00 47.81           N  
ATOM    891  CA  ALA   165      -5.053  63.802 -67.762  1.00 47.81           C  
ATOM    892  C   ALA   165      -5.774  63.592 -69.068  1.00 47.81           C  
ATOM    893  O   ALA   165      -5.400  64.164 -70.092  1.00 47.81           O  
ATOM    894  CB  ALA   165      -4.135  62.585 -67.537  1.00 47.81           C  
ATOM    895  N   PHE   166      -6.802  62.720 -69.068  1.00 81.11           N  
ATOM    896  CA  PHE   166      -7.564  62.334 -70.234  1.00 81.11           C  
ATOM    897  C   PHE   166      -8.500  63.402 -70.692  1.00 81.11           C  
ATOM    898  O   PHE   166      -8.688  63.589 -71.893  1.00 81.11           O  
ATOM    899  CB  PHE   166      -8.460  61.120 -69.955  1.00 81.11           C  
ATOM    900  CG  PHE   166      -7.596  59.920 -69.874  1.00 81.11           C  
ATOM    901  CD1 PHE   166      -6.693  59.778 -68.846  1.00 81.11           C  
ATOM    902  CD2 PHE   166      -7.717  58.925 -70.813  1.00 81.11           C  
ATOM    903  CE1 PHE   166      -5.900  58.659 -68.774  1.00 81.11           C  
ATOM    904  CE2 PHE   166      -6.927  57.804 -70.744  1.00 81.11           C  
ATOM    905  CZ  PHE   166      -6.017  57.676 -69.723  1.00 81.11           C  
ATOM    906  N   GLY   167      -9.155  64.084 -69.733  1.00 30.13           N  
ATOM    907  CA  GLY   167     -10.123  65.094 -70.038  1.00 30.13           C  
ATOM    908  C   GLY   167     -11.493  64.561 -69.723  1.00 30.13           C  
ATOM    909  O   GLY   167     -12.402  65.332 -69.426  1.00 30.13           O  
ATOM    910  N   ARG   168     -11.679  63.224 -69.776  1.00 90.87           N  
ATOM    911  CA  ARG   168     -12.964  62.636 -69.499  1.00 90.87           C  
ATOM    912  C   ARG   168     -12.765  61.160 -69.307  1.00 90.87           C  
ATOM    913  O   ARG   168     -11.652  60.662 -69.474  1.00 90.87           O  
ATOM    914  CB  ARG   168     -13.968  62.840 -70.651  1.00 90.87           C  
ATOM    915  CG  ARG   168     -13.471  62.300 -71.999  1.00 90.87           C  
ATOM    916  CD  ARG   168     -14.403  62.597 -73.179  1.00 90.87           C  
ATOM    917  NE  ARG   168     -13.772  62.037 -74.409  1.00 90.87           N  
ATOM    918  CZ  ARG   168     -12.971  62.821 -75.190  1.00 90.87           C  
ATOM    919  NH1 ARG   168     -12.781  64.135 -74.869  1.00 90.87           N1+
ATOM    920  NH2 ARG   168     -12.357  62.295 -76.291  1.00 90.87           N  
ATOM    921  N   ILE   169     -13.822  60.428 -68.874  1.00181.76           N  
ATOM    922  CA  ILE   169     -13.694  58.998 -68.744  1.00181.76           C  
ATOM    923  C   ILE   169     -14.913  58.324 -69.327  1.00181.76           C  
ATOM    924  O   ILE   169     -16.038  58.545 -68.881  1.00181.76           O  
ATOM    925  CB  ILE   169     -13.480  58.554 -67.314  1.00181.76           C  
ATOM    926  CG1 ILE   169     -13.016  57.087 -67.230  1.00181.76           C  
ATOM    927  CG2 ILE   169     -14.741  58.869 -66.495  1.00181.76           C  
ATOM    928  CD1 ILE   169     -14.044  56.049 -67.680  1.00181.76           C  
ATOM    929  N   ASP   170     -14.756  57.594 -70.451  1.00177.33           N  
ATOM    930  CA  ASP   170     -15.859  56.813 -70.947  1.00177.33           C  
ATOM    931  C   ASP   170     -15.905  55.361 -70.539  1.00177.33           C  
ATOM    932  O   ASP   170     -16.994  54.807 -70.392  1.00177.33           O  
ATOM    933  CB  ASP   170     -16.197  57.004 -72.433  1.00177.33           C  
ATOM    934  CG  ASP   170     -14.929  56.880 -73.218  1.00177.33           C  
ATOM    935  OD1 ASP   170     -14.262  57.934 -73.377  1.00177.33           O  
ATOM    936  OD2 ASP   170     -14.609  55.746 -73.660  1.00177.33           O1-
ATOM    937  N   VAL   171     -14.749  54.675 -70.372  1.00 62.84           N  
ATOM    938  CA  VAL   171     -14.844  53.270 -70.059  1.00 62.84           C  
ATOM    939  C   VAL   171     -13.961  52.923 -68.901  1.00 62.84           C  
ATOM    940  O   VAL   171     -12.786  53.284 -68.847  1.00 62.84           O  
ATOM    941  CB  VAL   171     -14.492  52.359 -71.196  1.00 62.84           C  
ATOM    942  CG1 VAL   171     -14.552  50.911 -70.683  1.00 62.84           C  
ATOM    943  CG2 VAL   171     -15.453  52.641 -72.366  1.00 62.84           C  
ATOM    944  N   LEU   172     -14.537  52.174 -67.938  1.00 57.63           N  
ATOM    945  CA  LEU   172     -13.832  51.760 -66.761  1.00 57.63           C  
ATOM    946  C   LEU   172     -13.750  50.271 -66.754  1.00 57.63           C  
ATOM    947  O   LEU   172     -14.759  49.578 -66.887  1.00 57.63           O  
ATOM    948  CB  LEU   172     -14.540  52.168 -65.460  1.00 57.63           C  
ATOM    949  CG  LEU   172     -13.894  51.615 -64.178  1.00 57.63           C  
ATOM    950  CD1 LEU   172     -12.484  52.182 -63.941  1.00 57.63           C  
ATOM    951  CD2 LEU   172     -14.830  51.806 -62.974  1.00 57.63           C  
ATOM    952  N   ILE   173     -12.520  49.740 -66.613  1.00154.23           N  
ATOM    953  CA  ILE   173     -12.394  48.319 -66.502  1.00154.23           C  
ATOM    954  C   ILE   173     -11.771  48.022 -65.161  1.00154.23           C  
ATOM    955  O   ILE   173     -10.639  48.411 -64.870  1.00154.23           O  
ATOM    956  CB  ILE   173     -11.616  47.698 -67.634  1.00154.23           C  
ATOM    957  CG1 ILE   173     -11.774  46.166 -67.679  1.00154.23           C  
ATOM    958  CG2 ILE   173     -10.179  48.210 -67.563  1.00154.23           C  
ATOM    959  CD1 ILE   173     -11.239  45.431 -66.449  1.00154.23           C  
ATOM    960  N   ASN   174     -12.531  47.327 -64.286  1.00 72.00           N  
ATOM    961  CA  ASN   174     -12.058  46.970 -62.972  1.00 72.00           C  
ATOM    962  C   ASN   174     -11.442  45.609 -63.114  1.00 72.00           C  
ATOM    963  O   ASN   174     -12.140  44.652 -63.449  1.00 72.00           O  
ATOM    964  CB  ASN   174     -13.182  46.821 -61.931  1.00 72.00           C  
ATOM    965  CG  ASN   174     -13.802  48.184 -61.655  1.00 72.00           C  
ATOM    966  ND2 ASN   174     -15.116  48.327 -61.982  1.00 72.00           N  
ATOM    967  OD1 ASN   174     -13.140  49.096 -61.163  1.00 72.00           O  
ATOM    968  N   ASN   175     -10.120  45.480 -62.850  1.00145.77           N  
ATOM    969  CA  ASN   175      -9.497  44.215 -63.139  1.00145.77           C  
ATOM    970  C   ASN   175      -8.466  43.796 -62.108  1.00145.77           C  
ATOM    971  O   ASN   175      -7.925  42.693 -62.204  1.00145.77           O  
ATOM    972  CB  ASN   175      -8.787  44.282 -64.509  1.00145.77           C  
ATOM    973  CG  ASN   175      -8.206  42.933 -64.920  1.00145.77           C  
ATOM    974  ND2 ASN   175      -6.849  42.846 -64.943  1.00145.77           N  
ATOM    975  OD1 ASN   175      -8.932  41.991 -65.235  1.00145.77           O  
ATOM    976  N   ALA   176      -8.172  44.618 -61.080  1.00 52.68           N  
ATOM    977  CA  ALA   176      -7.144  44.275 -60.122  1.00 52.68           C  
ATOM    978  C   ALA   176      -7.552  43.097 -59.279  1.00 52.68           C  
ATOM    979  O   ALA   176      -8.738  42.865 -59.045  1.00 52.68           O  
ATOM    980  CB  ALA   176      -6.808  45.428 -59.160  1.00 52.68           C  
ATOM    981  N   ALA   177      -6.556  42.296 -58.819  1.00 51.68           N  
ATOM    982  CA  ALA   177      -6.852  41.171 -57.968  1.00 51.68           C  
ATOM    983  C   ALA   177      -5.587  40.615 -57.373  1.00 51.68           C  
ATOM    984  O   ALA   177      -4.485  40.843 -57.873  1.00 51.68           O  
ATOM    985  CB  ALA   177      -7.558  40.021 -58.709  1.00 51.68           C  
ATOM    986  N   GLU   178      -5.735  39.900 -56.237  1.00 75.94           N  
ATOM    987  CA  GLU   178      -4.677  39.167 -55.602  1.00 75.94           C  
ATOM    988  C   GLU   178      -5.303  37.901 -55.104  1.00 75.94           C  
ATOM    989  O   GLU   178      -6.494  37.882 -54.789  1.00 75.94           O  
ATOM    990  CB  GLU   178      -3.979  39.883 -54.434  1.00 75.94           C  
ATOM    991  CG  GLU   178      -2.979  40.941 -54.908  1.00 75.94           C  
ATOM    992  CD  GLU   178      -2.208  41.458 -53.702  1.00 75.94           C  
ATOM    993  OE1 GLU   178      -2.850  42.049 -52.794  1.00 75.94           O  
ATOM    994  OE2 GLU   178      -0.963  41.264 -53.673  1.00 75.94           O1-
ATOM    995  N   GLN   179      -4.531  36.793 -55.069  1.00 60.66           N  
ATOM    996  CA  GLN   179      -5.086  35.546 -54.616  1.00 60.66           C  
ATOM    997  C   GLN   179      -4.041  34.824 -53.820  1.00 60.66           C  
ATOM    998  O   GLN   179      -2.864  34.830 -54.179  1.00 60.66           O  
ATOM    999  CB  GLN   179      -5.520  34.622 -55.769  1.00 60.66           C  
ATOM   1000  CG  GLN   179      -4.361  34.153 -56.654  1.00 60.66           C  
ATOM   1001  CD  GLN   179      -4.944  33.391 -57.838  1.00 60.66           C  
ATOM   1002  NE2 GLN   179      -4.097  32.560 -58.505  1.00 60.66           N  
ATOM   1003  OE1 GLN   179      -6.118  33.541 -58.169  1.00 60.66           O  
ATOM   1004  N   TYR   180      -4.455  34.208 -52.690  1.00 77.58           N  
ATOM   1005  CA  TYR   180      -3.557  33.458 -51.856  1.00 77.58           C  
ATOM   1006  C   TYR   180      -4.148  32.093 -51.660  1.00 77.58           C  
ATOM   1007  O   TYR   180      -5.055  31.910 -50.849  1.00 77.58           O  
ATOM   1008  CB  TYR   180      -3.393  34.089 -50.464  1.00 77.58           C  
ATOM   1009  CG  TYR   180      -2.816  35.441 -50.697  1.00 77.58           C  
ATOM   1010  CD1 TYR   180      -1.455  35.618 -50.764  1.00 77.58           C  
ATOM   1011  CD2 TYR   180      -3.641  36.531 -50.868  1.00 77.58           C  
ATOM   1012  CE1 TYR   180      -0.924  36.865 -50.988  1.00 77.58           C  
ATOM   1013  CE2 TYR   180      -3.115  37.782 -51.092  1.00 77.58           C  
ATOM   1014  CZ  TYR   180      -1.753  37.950 -51.153  1.00 77.58           C  
ATOM   1015  OH  TYR   180      -1.201  39.228 -51.385  1.00 77.58           O  
ATOM   1016  N   GLU   181      -3.598  31.088 -52.365  1.00 76.96           N  
ATOM   1017  CA  GLU   181      -4.088  29.739 -52.328  1.00 76.96           C  
ATOM   1018  C   GLU   181      -3.833  29.181 -50.968  1.00 76.96           C  
ATOM   1019  O   GLU   181      -2.839  29.517 -50.324  1.00 76.96           O  
ATOM   1020  CB  GLU   181      -3.366  28.834 -53.344  1.00 76.96           C  
ATOM   1021  CG  GLU   181      -3.927  27.414 -53.453  1.00 76.96           C  
ATOM   1022  CD  GLU   181      -3.061  26.638 -54.440  1.00 76.96           C  
ATOM   1023  OE1 GLU   181      -1.912  27.084 -54.706  1.00 76.96           O  
ATOM   1024  OE2 GLU   181      -3.537  25.582 -54.935  1.00 76.96           O1-
ATOM   1025  N   SER   182      -4.755  28.316 -50.494  1.00 35.36           N  
ATOM   1026  CA  SER   182      -4.626  27.706 -49.201  1.00 35.36           C  
ATOM   1027  C   SER   182      -5.146  26.309 -49.306  1.00 35.36           C  
ATOM   1028  O   SER   182      -6.023  26.014 -50.116  1.00 35.36           O  
ATOM   1029  CB  SER   182      -5.477  28.404 -48.130  1.00 35.36           C  
ATOM   1030  OG  SER   182      -6.849  28.289 -48.473  1.00 35.36           O  
ATOM   1031  N   SER   183      -4.601  25.413 -48.463  0.50 80.62           N  
ATOM   1032  CA  SER   183      -4.967  24.028 -48.457  0.50 80.62           C  
ATOM   1033  C   SER   183      -6.387  23.875 -48.009  0.50 80.62           C  
ATOM   1034  O   SER   183      -7.104  23.020 -48.530  0.50 80.62           O  
ATOM   1035  CB  SER   183      -4.073  23.205 -47.514  0.50 80.62           C  
ATOM   1036  OG  SER   183      -4.210  23.674 -46.180  1.00 80.62           O  
ATOM   1037  N   THR   184      -6.833  24.678 -47.015  1.00 61.67           N  
ATOM   1038  CA  THR   184      -8.190  24.546 -46.564  1.00 61.67           C  
ATOM   1039  C   THR   184      -8.559  25.829 -45.860  1.00 61.67           C  
ATOM   1040  O   THR   184      -7.738  26.733 -45.715  1.00 61.67           O  
ATOM   1041  CB  THR   184      -8.363  23.394 -45.610  1.00 61.67           C  
ATOM   1042  CG2 THR   184      -9.866  23.120 -45.407  1.00 61.67           C  
ATOM   1043  OG1 THR   184      -7.784  22.224 -46.168  1.00 61.67           O  
ATOM   1044  N   ILE   185      -9.816  25.928 -45.384  1.00102.15           N  
ATOM   1045  CA  ILE   185     -10.366  27.091 -44.743  1.00102.15           C  
ATOM   1046  C   ILE   185      -9.593  27.424 -43.502  1.00102.15           C  
ATOM   1047  O   ILE   185      -9.406  28.598 -43.194  1.00102.15           O  
ATOM   1048  CB  ILE   185     -11.787  26.909 -44.295  1.00102.15           C  
ATOM   1049  CG1 ILE   185     -12.327  28.237 -43.738  1.00102.15           C  
ATOM   1050  CG2 ILE   185     -11.827  25.748 -43.287  1.00102.15           C  
ATOM   1051  CD1 ILE   185     -13.829  28.221 -43.454  1.00102.15           C  
ATOM   1052  N   GLU   186      -9.121  26.404 -42.758  1.00104.62           N  
ATOM   1053  CA  GLU   186      -8.472  26.641 -41.495  1.00104.62           C  
ATOM   1054  C   GLU   186      -7.324  27.563 -41.736  1.00104.62           C  
ATOM   1055  O   GLU   186      -6.979  28.377 -40.882  1.00104.62           O  
ATOM   1056  CB  GLU   186      -7.831  25.392 -40.863  1.00104.62           C  
ATOM   1057  CG  GLU   186      -8.785  24.228 -40.601  1.00104.62           C  
ATOM   1058  CD  GLU   186      -8.769  23.370 -41.854  1.00104.62           C  
ATOM   1059  OE1 GLU   186      -7.836  22.533 -41.980  1.00104.62           O  
ATOM   1060  OE2 GLU   186      -9.678  23.551 -42.708  1.00104.62           O1-
ATOM   1061  N   GLU   187      -6.702  27.420 -42.916  1.00108.37           N  
ATOM   1062  CA  GLU   187      -5.553  28.144 -43.374  1.00108.37           C  
ATOM   1063  C   GLU   187      -5.847  29.599 -43.619  1.00108.37           C  
ATOM   1064  O   GLU   187      -4.913  30.389 -43.733  1.00108.37           O  
ATOM   1065  CB  GLU   187      -4.958  27.569 -44.669  1.00108.37           C  
ATOM   1066  CG  GLU   187      -4.199  26.259 -44.447  1.00108.37           C  
ATOM   1067  CD  GLU   187      -2.916  26.600 -43.699  1.00108.37           C  
ATOM   1068  OE1 GLU   187      -2.591  27.815 -43.610  1.00108.37           O  
ATOM   1069  OE2 GLU   187      -2.250  25.655 -43.201  1.00108.37           O1-
ATOM   1070  N   ILE   188      -7.125  30.006 -43.773  1.00 58.50           N  
ATOM   1071  CA  ILE   188      -7.386  31.379 -44.134  1.00 58.50           C  
ATOM   1072  C   ILE   188      -7.519  32.217 -42.899  1.00 58.50           C  
ATOM   1073  O   ILE   188      -8.460  32.075 -42.121  1.00 58.50           O  
ATOM   1074  CB  ILE   188      -8.655  31.532 -44.926  1.00 58.50           C  
ATOM   1075  CG1 ILE   188      -8.553  30.763 -46.254  1.00 58.50           C  
ATOM   1076  CG2 ILE   188      -8.936  33.032 -45.106  1.00 58.50           C  
ATOM   1077  CD1 ILE   188      -9.894  30.604 -46.969  1.00 58.50           C  
ATOM   1078  N   ASP   189      -6.554  33.142 -42.707  1.00 98.82           N  
ATOM   1079  CA  ASP   189      -6.541  33.988 -41.551  1.00 98.82           C  
ATOM   1080  C   ASP   189      -7.424  35.165 -41.803  1.00 98.82           C  
ATOM   1081  O   ASP   189      -7.845  35.431 -42.927  1.00 98.82           O  
ATOM   1082  CB  ASP   189      -5.134  34.490 -41.191  1.00 98.82           C  
ATOM   1083  CG  ASP   189      -4.317  33.257 -40.823  1.00 98.82           C  
ATOM   1084  OD1 ASP   189      -4.881  32.134 -40.917  1.00 98.82           O  
ATOM   1085  OD2 ASP   189      -3.121  33.414 -40.459  1.00 98.82           O1-
ATOM   1086  N   GLU   190      -7.732  35.896 -40.722  1.00 76.56           N  
ATOM   1087  CA  GLU   190      -8.588  37.036 -40.790  1.00 76.56           C  
ATOM   1088  C   GLU   190      -7.932  38.076 -41.642  1.00 76.56           C  
ATOM   1089  O   GLU   190      -8.592  38.690 -42.484  1.00 76.56           O  
ATOM   1090  CB  GLU   190      -8.852  37.601 -39.379  1.00 76.56           C  
ATOM   1091  CG  GLU   190      -9.850  38.754 -39.294  1.00 76.56           C  
ATOM   1092  CD  GLU   190      -9.966  39.108 -37.817  1.00 76.56           C  
ATOM   1093  OE1 GLU   190     -10.027  38.163 -36.985  1.00 76.56           O  
ATOM   1094  OE2 GLU   190      -9.987  40.327 -37.500  1.00 76.56           O1-
ATOM   1095  N   PRO   191      -6.656  38.305 -41.480  0.60 66.79           N  
ATOM   1096  CA  PRO   191      -6.028  39.310 -42.285  0.60 66.79           C  
ATOM   1097  C   PRO   191      -6.007  38.979 -43.740  0.60 66.79           C  
ATOM   1098  O   PRO   191      -6.133  39.891 -44.556  0.60 66.79           O  
ATOM   1099  CB  PRO   191      -4.652  39.546 -41.670  0.60 66.79           C  
ATOM   1100  CG  PRO   191      -4.866  39.210 -40.186  0.60 66.79           C  
ATOM   1101  CD  PRO   191      -5.997  38.167 -40.187  0.60 66.79           C  
ATOM   1102  N   ARG   192      -5.834  37.694 -44.091  1.00106.96           N  
ATOM   1103  CA  ARG   192      -5.770  37.314 -45.471  1.00106.96           C  
ATOM   1104  C   ARG   192      -7.104  37.547 -46.103  1.00106.96           C  
ATOM   1105  O   ARG   192      -7.197  38.081 -47.208  1.00106.96           O  
ATOM   1106  CB  ARG   192      -5.399  35.829 -45.649  1.00106.96           C  
ATOM   1107  CG  ARG   192      -5.311  35.392 -47.110  1.00106.96           C  
ATOM   1108  CD  ARG   192      -4.150  36.037 -47.871  1.00106.96           C  
ATOM   1109  NE  ARG   192      -2.927  35.221 -47.622  1.00106.96           N  
ATOM   1110  CZ  ARG   192      -1.695  35.807 -47.681  1.00106.96           C  
ATOM   1111  NH1 ARG   192      -1.588  37.149 -47.896  1.00106.96           N1+
ATOM   1112  NH2 ARG   192      -0.568  35.051 -47.520  1.00106.96           N  
ATOM   1113  N   LEU   193      -8.183  37.165 -45.397  1.00 51.69           N  
ATOM   1114  CA  LEU   193      -9.491  37.273 -45.969  1.00 51.69           C  
ATOM   1115  C   LEU   193      -9.830  38.714 -46.189  1.00 51.69           C  
ATOM   1116  O   LEU   193     -10.359  39.077 -47.237  1.00 51.69           O  
ATOM   1117  CB  LEU   193     -10.586  36.628 -45.096  1.00 51.69           C  
ATOM   1118  CG  LEU   193     -11.972  36.620 -45.768  1.00 51.69           C  
ATOM   1119  CD1 LEU   193     -11.931  35.860 -47.104  1.00 51.69           C  
ATOM   1120  CD2 LEU   193     -13.046  36.058 -44.823  1.00 51.69           C  
ATOM   1121  N   GLU   194      -9.527  39.580 -45.206  1.00 34.60           N  
ATOM   1122  CA  GLU   194      -9.878  40.968 -45.317  1.00 34.60           C  
ATOM   1123  C   GLU   194      -9.120  41.588 -46.449  1.00 34.60           C  
ATOM   1124  O   GLU   194      -9.678  42.349 -47.241  1.00 34.60           O  
ATOM   1125  CB  GLU   194      -9.517  41.778 -44.062  1.00 34.60           C  
ATOM   1126  CG  GLU   194     -10.290  41.366 -42.812  1.00 34.60           C  
ATOM   1127  CD  GLU   194      -9.892  42.325 -41.697  1.00 34.60           C  
ATOM   1128  OE1 GLU   194      -9.965  43.561 -41.932  1.00 34.60           O  
ATOM   1129  OE2 GLU   194      -9.507  41.837 -40.600  1.00 34.60           O1-
ATOM   1130  N   ARG   195      -7.820  41.261 -46.554  1.00 53.60           N  
ATOM   1131  CA  ARG   195      -6.963  41.831 -47.551  1.00 53.60           C  
ATOM   1132  C   ARG   195      -7.476  41.461 -48.903  1.00 53.60           C  
ATOM   1133  O   ARG   195      -7.532  42.293 -49.809  1.00 53.60           O  
ATOM   1134  CB  ARG   195      -5.526  41.294 -47.432  1.00 53.60           C  
ATOM   1135  CG  ARG   195      -4.540  41.850 -48.463  1.00 53.60           C  
ATOM   1136  CD  ARG   195      -3.145  41.231 -48.342  1.00 53.60           C  
ATOM   1137  NE  ARG   195      -2.292  41.792 -49.426  1.00 53.60           N  
ATOM   1138  CZ  ARG   195      -0.953  41.528 -49.438  1.00 53.60           C  
ATOM   1139  NH1 ARG   195      -0.402  40.770 -48.446  1.00 53.60           N1+
ATOM   1140  NH2 ARG   195      -0.163  42.019 -50.437  1.00 53.60           N  
ATOM   1141  N   VAL   196      -7.882  40.192 -49.068  1.00 31.92           N  
ATOM   1142  CA  VAL   196      -8.328  39.727 -50.349  1.00 31.92           C  
ATOM   1143  C   VAL   196      -9.548  40.494 -50.755  1.00 31.92           C  
ATOM   1144  O   VAL   196      -9.662  40.917 -51.904  1.00 31.92           O  
ATOM   1145  CB  VAL   196      -8.679  38.268 -50.360  1.00 31.92           C  
ATOM   1146  CG1 VAL   196      -9.216  37.907 -51.759  1.00 31.92           C  
ATOM   1147  CG2 VAL   196      -7.434  37.467 -49.954  1.00 31.92           C  
ATOM   1148  N   PHE   197     -10.498  40.696 -49.822  1.00122.90           N  
ATOM   1149  CA  PHE   197     -11.709  41.395 -50.143  1.00122.90           C  
ATOM   1150  C   PHE   197     -11.451  42.841 -50.437  1.00122.90           C  
ATOM   1151  O   PHE   197     -12.056  43.410 -51.344  1.00122.90           O  
ATOM   1152  CB  PHE   197     -12.800  41.325 -49.057  1.00122.90           C  
ATOM   1153  CG  PHE   197     -13.493  40.010 -49.184  1.00122.90           C  
ATOM   1154  CD1 PHE   197     -14.580  39.892 -50.018  1.00122.90           C  
ATOM   1155  CD2 PHE   197     -13.067  38.899 -48.492  1.00122.90           C  
ATOM   1156  CE1 PHE   197     -15.240  38.693 -50.159  1.00122.90           C  
ATOM   1157  CE2 PHE   197     -13.724  37.697 -48.630  1.00122.90           C  
ATOM   1158  CZ  PHE   197     -14.812  37.590 -49.461  1.00122.90           C  
ATOM   1159  N   ARG   198     -10.547  43.490 -49.680  1.00154.97           N  
ATOM   1160  CA  ARG   198     -10.383  44.900 -49.876  1.00154.97           C  
ATOM   1161  C   ARG   198      -9.937  45.186 -51.283  1.00154.97           C  
ATOM   1162  O   ARG   198     -10.454  46.102 -51.923  1.00154.97           O  
ATOM   1163  CB  ARG   198      -9.369  45.529 -48.910  1.00154.97           C  
ATOM   1164  CG  ARG   198      -9.419  47.057 -48.894  1.00154.97           C  
ATOM   1165  CD  ARG   198     -10.750  47.610 -48.375  1.00154.97           C  
ATOM   1166  NE  ARG   198     -10.893  47.189 -46.953  1.00154.97           N  
ATOM   1167  CZ  ARG   198     -10.987  48.139 -45.977  1.00154.97           C  
ATOM   1168  NH1 ARG   198     -10.909  49.459 -46.311  1.00154.97           N1+
ATOM   1169  NH2 ARG   198     -11.154  47.772 -44.673  1.00154.97           N  
ATOM   1170  N   THR   199      -8.930  44.446 -51.790  1.00118.82           N  
ATOM   1171  CA  THR   199      -8.440  44.680 -53.125  1.00118.82           C  
ATOM   1172  C   THR   199      -9.370  44.169 -54.199  1.00118.82           C  
ATOM   1173  O   THR   199      -9.627  44.865 -55.180  1.00118.82           O  
ATOM   1174  CB  THR   199      -7.078  44.083 -53.362  1.00118.82           C  
ATOM   1175  CG2 THR   199      -7.169  42.546 -53.349  1.00118.82           C  
ATOM   1176  OG1 THR   199      -6.563  44.536 -54.605  1.00118.82           O  
ATOM   1177  N   ASN   200      -9.874  42.922 -54.058  1.00 89.21           N  
ATOM   1178  CA  ASN   200     -10.653  42.302 -55.097  1.00 89.21           C  
ATOM   1179  C   ASN   200     -12.028  42.882 -55.289  1.00 89.21           C  
ATOM   1180  O   ASN   200     -12.468  42.999 -56.431  1.00 89.21           O  
ATOM   1181  CB  ASN   200     -10.827  40.784 -54.906  1.00 89.21           C  
ATOM   1182  CG  ASN   200      -9.508  40.110 -55.256  1.00 89.21           C  
ATOM   1183  ND2 ASN   200      -9.444  38.766 -55.056  1.00 89.21           N  
ATOM   1184  OD1 ASN   200      -8.564  40.757 -55.707  1.00 89.21           O  
ATOM   1185  N   ILE   201     -12.830  43.043 -54.215  1.00158.94           N  
ATOM   1186  CA  ILE   201     -14.145  43.631 -54.348  1.00158.94           C  
ATOM   1187  C   ILE   201     -14.267  45.097 -54.035  1.00158.94           C  
ATOM   1188  O   ILE   201     -14.880  45.871 -54.768  1.00158.94           O  
ATOM   1189  CB  ILE   201     -15.200  42.882 -53.584  1.00158.94           C  
ATOM   1190  CG1 ILE   201     -16.600  43.359 -54.009  1.00158.94           C  
ATOM   1191  CG2 ILE   201     -14.906  43.022 -52.085  1.00158.94           C  
ATOM   1192  CD1 ILE   201     -16.949  43.040 -55.465  1.00158.94           C  
ATOM   1193  N   PHE   202     -13.687  45.520 -52.898  1.00 80.45           N  
ATOM   1194  CA  PHE   202     -13.933  46.849 -52.412  1.00 80.45           C  
ATOM   1195  C   PHE   202     -13.410  47.869 -53.365  1.00 80.45           C  
ATOM   1196  O   PHE   202     -14.034  48.909 -53.571  1.00 80.45           O  
ATOM   1197  CB  PHE   202     -13.378  47.101 -51.006  1.00 80.45           C  
ATOM   1198  CG  PHE   202     -14.251  46.280 -50.119  1.00 80.45           C  
ATOM   1199  CD1 PHE   202     -15.562  46.642 -49.925  1.00 80.45           C  
ATOM   1200  CD2 PHE   202     -13.765  45.164 -49.479  1.00 80.45           C  
ATOM   1201  CE1 PHE   202     -16.385  45.900 -49.114  1.00 80.45           C  
ATOM   1202  CE2 PHE   202     -14.586  44.418 -48.665  1.00 80.45           C  
ATOM   1203  CZ  PHE   202     -15.898  44.782 -48.482  1.00 80.45           C  
ATOM   1204  N   SER   203     -12.244  47.602 -53.970  1.00 32.03           N  
ATOM   1205  CA  SER   203     -11.673  48.558 -54.872  1.00 32.03           C  
ATOM   1206  C   SER   203     -12.615  48.750 -56.017  1.00 32.03           C  
ATOM   1207  O   SER   203     -12.741  49.853 -56.542  1.00 32.03           O  
ATOM   1208  CB  SER   203     -10.328  48.101 -55.466  1.00 32.03           C  
ATOM   1209  OG  SER   203     -10.531  46.996 -56.335  1.00 32.03           O  
ATOM   1210  N   TYR   204     -13.310  47.671 -56.428  1.00 74.42           N  
ATOM   1211  CA  TYR   204     -14.244  47.731 -57.516  1.00 74.42           C  
ATOM   1212  C   TYR   204     -15.333  48.691 -57.153  1.00 74.42           C  
ATOM   1213  O   TYR   204     -15.766  49.486 -57.985  1.00 74.42           O  
ATOM   1214  CB  TYR   204     -14.908  46.365 -57.790  1.00 74.42           C  
ATOM   1215  CG  TYR   204     -13.960  45.477 -58.525  1.00 74.42           C  
ATOM   1216  CD1 TYR   204     -12.704  45.201 -58.037  1.00 74.42           C  
ATOM   1217  CD2 TYR   204     -14.356  44.875 -59.699  1.00 74.42           C  
ATOM   1218  CE1 TYR   204     -11.849  44.369 -58.727  1.00 74.42           C  
ATOM   1219  CE2 TYR   204     -13.510  44.043 -60.392  1.00 74.42           C  
ATOM   1220  CZ  TYR   204     -12.250  43.790 -59.908  1.00 74.42           C  
ATOM   1221  OH  TYR   204     -11.376  42.935 -60.613  1.00 74.42           O  
ATOM   1222  N   PHE   205     -15.832  48.624 -55.905  1.00116.77           N  
ATOM   1223  CA  PHE   205     -16.867  49.527 -55.491  1.00116.77           C  
ATOM   1224  C   PHE   205     -16.381  50.946 -55.446  1.00116.77           C  
ATOM   1225  O   PHE   205     -17.040  51.848 -55.961  1.00116.77           O  
ATOM   1226  CB  PHE   205     -17.450  49.210 -54.106  1.00116.77           C  
ATOM   1227  CG  PHE   205     -18.473  48.135 -54.240  1.00116.77           C  
ATOM   1228  CD1 PHE   205     -18.131  46.805 -54.175  1.00116.77           C  
ATOM   1229  CD2 PHE   205     -19.792  48.475 -54.439  1.00116.77           C  
ATOM   1230  CE1 PHE   205     -19.091  45.828 -54.296  1.00116.77           C  
ATOM   1231  CE2 PHE   205     -20.756  47.504 -54.562  1.00116.77           C  
ATOM   1232  CZ  PHE   205     -20.406  46.177 -54.491  1.00116.77           C  
ATOM   1233  N   PHE   206     -15.209  51.190 -54.831  1.00 97.12           N  
ATOM   1234  CA  PHE   206     -14.765  52.543 -54.640  1.00 97.12           C  
ATOM   1235  C   PHE   206     -14.423  53.222 -55.933  1.00 97.12           C  
ATOM   1236  O   PHE   206     -14.786  54.378 -56.142  1.00 97.12           O  
ATOM   1237  CB  PHE   206     -13.575  52.670 -53.677  1.00 97.12           C  
ATOM   1238  CG  PHE   206     -14.063  52.116 -52.383  1.00 97.12           C  
ATOM   1239  CD1 PHE   206     -15.131  52.701 -51.741  1.00 97.12           C  
ATOM   1240  CD2 PHE   206     -13.505  50.981 -51.842  1.00 97.12           C  
ATOM   1241  CE1 PHE   206     -15.604  52.190 -50.556  1.00 97.12           C  
ATOM   1242  CE2 PHE   206     -13.972  50.466 -50.655  1.00 97.12           C  
ATOM   1243  CZ  PHE   206     -15.021  51.074 -50.008  1.00 97.12           C  
ATOM   1244  N   LEU   207     -13.703  52.532 -56.836  1.00 95.16           N  
ATOM   1245  CA  LEU   207     -13.290  53.145 -58.069  1.00 95.16           C  
ATOM   1246  C   LEU   207     -14.510  53.452 -58.879  1.00 95.16           C  
ATOM   1247  O   LEU   207     -14.632  54.541 -59.438  1.00 95.16           O  
ATOM   1248  CB  LEU   207     -12.376  52.218 -58.903  1.00 95.16           C  
ATOM   1249  CG  LEU   207     -11.692  52.835 -60.150  1.00 95.16           C  
ATOM   1250  CD1 LEU   207     -10.827  51.781 -60.846  1.00 95.16           C  
ATOM   1251  CD2 LEU   207     -12.661  53.495 -61.145  1.00 95.16           C  
ATOM   1252  N   THR   208     -15.452  52.494 -58.959  1.00 36.19           N  
ATOM   1253  CA  THR   208     -16.619  52.666 -59.776  1.00 36.19           C  
ATOM   1254  C   THR   208     -17.433  53.796 -59.231  1.00 36.19           C  
ATOM   1255  O   THR   208     -17.978  54.599 -59.984  1.00 36.19           O  
ATOM   1256  CB  THR   208     -17.486  51.445 -59.824  1.00 36.19           C  
ATOM   1257  CG2 THR   208     -18.669  51.732 -60.761  1.00 36.19           C  
ATOM   1258  OG1 THR   208     -16.744  50.337 -60.311  1.00 36.19           O  
ATOM   1259  N   ARG   209     -17.524  53.889 -57.893  1.00 68.61           N  
ATOM   1260  CA  ARG   209     -18.336  54.888 -57.260  1.00 68.61           C  
ATOM   1261  C   ARG   209     -17.829  56.246 -57.649  1.00 68.61           C  
ATOM   1262  O   ARG   209     -18.616  57.131 -57.988  1.00 68.61           O  
ATOM   1263  CB  ARG   209     -18.294  54.772 -55.725  1.00 68.61           C  
ATOM   1264  CG  ARG   209     -19.425  55.507 -54.996  1.00 68.61           C  
ATOM   1265  CD  ARG   209     -19.008  56.817 -54.320  1.00 68.61           C  
ATOM   1266  NE  ARG   209     -20.096  57.194 -53.370  1.00 68.61           N  
ATOM   1267  CZ  ARG   209     -20.953  58.221 -53.645  1.00 68.61           C  
ATOM   1268  NH1 ARG   209     -20.811  58.951 -54.787  1.00 68.61           N1+
ATOM   1269  NH2 ARG   209     -21.949  58.520 -52.761  1.00 68.61           N  
ATOM   1270  N   HIS   210     -16.496  56.452 -57.630  1.00 47.41           N  
ATOM   1271  CA  HIS   210     -15.957  57.743 -57.969  1.00 47.41           C  
ATOM   1272  C   HIS   210     -16.190  58.017 -59.423  1.00 47.41           C  
ATOM   1273  O   HIS   210     -16.361  59.164 -59.833  1.00 47.41           O  
ATOM   1274  CB  HIS   210     -14.448  57.902 -57.723  1.00 47.41           C  
ATOM   1275  CG  HIS   210     -14.020  59.317 -57.985  1.00 47.41           C  
ATOM   1276  CD2 HIS   210     -13.753  60.332 -57.119  1.00 47.41           C  
ATOM   1277  ND1 HIS   210     -13.847  59.843 -59.245  1.00 47.41           N  
ATOM   1278  CE1 HIS   210     -13.486  61.142 -59.081  1.00 47.41           C  
ATOM   1279  NE2 HIS   210     -13.416  61.485 -57.809  1.00 47.41           N  
ATOM   1280  N   ALA   211     -16.170  56.956 -60.241  1.00 50.51           N  
ATOM   1281  CA  ALA   211     -16.316  57.028 -61.666  1.00 50.51           C  
ATOM   1282  C   ALA   211     -17.667  57.562 -62.055  1.00 50.51           C  
ATOM   1283  O   ALA   211     -17.798  58.244 -63.071  1.00 50.51           O  
ATOM   1284  CB  ALA   211     -16.176  55.649 -62.336  1.00 50.51           C  
ATOM   1285  N   LEU   212     -18.714  57.279 -61.257  1.00 66.55           N  
ATOM   1286  CA  LEU   212     -20.064  57.562 -61.667  1.00 66.55           C  
ATOM   1287  C   LEU   212     -20.307  59.000 -62.015  1.00 66.55           C  
ATOM   1288  O   LEU   212     -21.029  59.271 -62.972  1.00 66.55           O  
ATOM   1289  CB  LEU   212     -21.125  57.093 -60.656  1.00 66.55           C  
ATOM   1290  CG  LEU   212     -21.232  55.554 -60.589  1.00 66.55           C  
ATOM   1291  CD1 LEU   212     -22.302  55.092 -59.588  1.00 66.55           C  
ATOM   1292  CD2 LEU   212     -21.443  54.957 -61.990  1.00 66.55           C  
ATOM   1293  N   LYS   213     -19.737  59.977 -61.292  1.00107.26           N  
ATOM   1294  CA  LYS   213     -20.055  61.331 -61.669  1.00107.26           C  
ATOM   1295  C   LYS   213     -19.589  61.601 -63.070  1.00107.26           C  
ATOM   1296  O   LYS   213     -20.182  62.410 -63.781  1.00107.26           O  
ATOM   1297  CB  LYS   213     -19.491  62.418 -60.732  1.00107.26           C  
ATOM   1298  CG  LYS   213     -20.331  62.582 -59.462  1.00107.26           C  
ATOM   1299  CD  LYS   213     -19.819  63.639 -58.484  1.00107.26           C  
ATOM   1300  CE  LYS   213     -18.838  63.114 -57.438  1.00107.26           C  
ATOM   1301  NZ  LYS   213     -17.454  63.468 -57.817  1.00107.26           N1+
ATOM   1302  N   HIS   214     -18.488  60.961 -63.490  1.00 88.16           N  
ATOM   1303  CA  HIS   214     -17.873  61.123 -64.783  1.00 88.16           C  
ATOM   1304  C   HIS   214     -18.601  60.444 -65.912  1.00 88.16           C  
ATOM   1305  O   HIS   214     -18.446  60.847 -67.065  1.00 88.16           O  
ATOM   1306  CB  HIS   214     -16.436  60.591 -64.803  1.00 88.16           C  
ATOM   1307  CG  HIS   214     -15.600  61.270 -63.770  1.00 88.16           C  
ATOM   1308  CD2 HIS   214     -15.164  60.815 -62.565  1.00 88.16           C  
ATOM   1309  ND1 HIS   214     -15.140  62.562 -63.876  1.00 88.16           N  
ATOM   1310  CE1 HIS   214     -14.454  62.826 -62.736  1.00 88.16           C  
ATOM   1311  NE2 HIS   214     -14.442  61.795 -61.910  1.00 88.16           N  
ATOM   1312  N   MET   215     -19.353  59.359 -65.638  1.00115.49           N  
ATOM   1313  CA  MET   215     -19.944  58.568 -66.691  1.00115.49           C  
ATOM   1314  C   MET   215     -21.266  59.127 -67.122  1.00115.49           C  
ATOM   1315  O   MET   215     -22.038  59.630 -66.309  1.00115.49           O  
ATOM   1316  CB  MET   215     -20.209  57.107 -66.276  1.00115.49           C  
ATOM   1317  CG  MET   215     -18.949  56.296 -65.959  1.00115.49           C  
ATOM   1318  SD  MET   215     -17.889  55.941 -67.393  1.00115.49           S  
ATOM   1319  CE  MET   215     -16.703  54.888 -66.506  1.00115.49           C  
ATOM   1320  N   LYS   216     -21.553  59.035 -68.443  1.00163.22           N  
ATOM   1321  CA  LYS   216     -22.788  59.518 -68.998  1.00163.22           C  
ATOM   1322  C   LYS   216     -23.311  58.477 -69.933  1.00163.22           C  
ATOM   1323  O   LYS   216     -22.736  57.400 -70.079  1.00163.22           O  
ATOM   1324  CB  LYS   216     -22.649  60.798 -69.843  1.00163.22           C  
ATOM   1325  CG  LYS   216     -22.163  62.019 -69.064  1.00163.22           C  
ATOM   1326  CD  LYS   216     -23.031  62.361 -67.850  1.00163.22           C  
ATOM   1327  CE  LYS   216     -22.546  63.587 -67.068  1.00163.22           C  
ATOM   1328  NZ  LYS   216     -21.108  63.448 -66.733  1.00163.22           N1+
ATOM   1329  N   GLU   217     -24.440  58.790 -70.600  1.00 79.13           N  
ATOM   1330  CA  GLU   217     -25.028  57.852 -71.507  1.00 79.13           C  
ATOM   1331  C   GLU   217     -23.994  57.495 -72.521  1.00 79.13           C  
ATOM   1332  O   GLU   217     -23.275  58.358 -73.023  1.00 79.13           O  
ATOM   1333  CB  GLU   217     -26.247  58.402 -72.266  1.00 79.13           C  
ATOM   1334  CG  GLU   217     -26.872  57.392 -73.232  1.00 79.13           C  
ATOM   1335  CD  GLU   217     -28.059  58.063 -73.910  1.00 79.13           C  
ATOM   1336  OE1 GLU   217     -28.383  59.218 -73.521  1.00 79.13           O  
ATOM   1337  OE2 GLU   217     -28.653  57.435 -74.827  1.00 79.13           O1-
ATOM   1338  N   GLY   218     -23.895  56.186 -72.827  1.00 32.54           N  
ATOM   1339  CA  GLY   218     -22.973  55.707 -73.811  1.00 32.54           C  
ATOM   1340  C   GLY   218     -21.729  55.177 -73.158  1.00 32.54           C  
ATOM   1341  O   GLY   218     -20.933  54.510 -73.819  1.00 32.54           O  
ATOM   1342  N   SER   219     -21.519  55.432 -71.848  1.00 97.58           N  
ATOM   1343  CA  SER   219     -20.291  54.966 -71.252  1.00 97.58           C  
ATOM   1344  C   SER   219     -20.432  53.541 -70.789  1.00 97.58           C  
ATOM   1345  O   SER   219     -21.523  52.971 -70.818  1.00 97.58           O  
ATOM   1346  CB  SER   219     -19.758  55.824 -70.087  1.00 97.58           C  
ATOM   1347  OG  SER   219     -20.541  55.639 -68.921  1.00 97.58           O  
ATOM   1348  N   SER   220     -19.307  52.919 -70.354  1.00 97.58           N  
ATOM   1349  CA  SER   220     -19.373  51.517 -70.029  1.00 97.58           C  
ATOM   1350  C   SER   220     -18.439  51.121 -68.913  1.00 97.58           C  
ATOM   1351  O   SER   220     -17.386  51.722 -68.694  1.00 97.58           O  
ATOM   1352  CB  SER   220     -19.037  50.607 -71.222  1.00 97.58           C  
ATOM   1353  OG  SER   220     -17.677  50.772 -71.595  1.00 97.58           O  
ATOM   1354  N   ILE   221     -18.832  50.054 -68.177  1.00 59.26           N  
ATOM   1355  CA  ILE   221     -18.066  49.501 -67.092  1.00 59.26           C  
ATOM   1356  C   ILE   221     -17.897  48.028 -67.359  1.00 59.26           C  
ATOM   1357  O   ILE   221     -18.852  47.335 -67.713  1.00 59.26           O  
ATOM   1358  CB  ILE   221     -18.772  49.650 -65.772  1.00 59.26           C  
ATOM   1359  CG1 ILE   221     -19.055  51.138 -65.484  1.00 59.26           C  
ATOM   1360  CG2 ILE   221     -17.931  48.959 -64.687  1.00 59.26           C  
ATOM   1361  CD1 ILE   221     -20.053  51.379 -64.351  1.00 59.26           C  
ATOM   1362  N   ILE   222     -16.654  47.515 -67.223  1.00 59.01           N  
ATOM   1363  CA  ILE   222     -16.363  46.116 -67.407  1.00 59.01           C  
ATOM   1364  C   ILE   222     -15.663  45.649 -66.161  1.00 59.01           C  
ATOM   1365  O   ILE   222     -14.719  46.290 -65.700  1.00 59.01           O  
ATOM   1366  CB  ILE   222     -15.399  45.860 -68.529  1.00 59.01           C  
ATOM   1367  CG1 ILE   222     -15.939  46.405 -69.859  1.00 59.01           C  
ATOM   1368  CG2 ILE   222     -15.097  44.354 -68.558  1.00 59.01           C  
ATOM   1369  CD1 ILE   222     -14.879  46.447 -70.960  1.00 59.01           C  
ATOM   1370  N   ASN   223     -16.104  44.507 -65.592  1.00 59.67           N  
ATOM   1371  CA  ASN   223     -15.519  43.995 -64.379  1.00 59.67           C  
ATOM   1372  C   ASN   223     -14.934  42.649 -64.673  1.00 59.67           C  
ATOM   1373  O   ASN   223     -15.570  41.805 -65.302  1.00 59.67           O  
ATOM   1374  CB  ASN   223     -16.560  43.767 -63.265  1.00 59.67           C  
ATOM   1375  CG  ASN   223     -17.158  45.107 -62.851  1.00 59.67           C  
ATOM   1376  ND2 ASN   223     -18.494  45.268 -63.046  1.00 59.67           N  
ATOM   1377  OD1 ASN   223     -16.455  45.992 -62.366  1.00 59.67           O  
ATOM   1378  N   THR   224     -13.701  42.387 -64.200  1.00140.58           N  
ATOM   1379  CA  THR   224     -13.141  41.094 -64.461  1.00140.58           C  
ATOM   1380  C   THR   224     -13.460  40.216 -63.279  1.00140.58           C  
ATOM   1381  O   THR   224     -13.128  40.510 -62.131  1.00140.58           O  
ATOM   1382  CB  THR   224     -11.656  41.143 -64.726  1.00140.58           C  
ATOM   1383  CG2 THR   224     -10.893  41.388 -63.417  1.00140.58           C  
ATOM   1384  OG1 THR   224     -11.218  39.936 -65.326  1.00140.58           O  
ATOM   1385  N   THR   225     -14.195  39.122 -63.555  1.00127.77           N  
ATOM   1386  CA  THR   225     -14.601  38.149 -62.582  1.00127.77           C  
ATOM   1387  C   THR   225     -13.682  36.980 -62.752  1.00127.77           C  
ATOM   1388  O   THR   225     -12.478  37.151 -62.930  1.00127.77           O  
ATOM   1389  CB  THR   225     -16.005  37.653 -62.813  1.00127.77           C  
ATOM   1390  CG2 THR   225     -16.958  38.857 -62.802  1.00127.77           C  
ATOM   1391  OG1 THR   225     -16.098  36.986 -64.064  1.00127.77           O  
ATOM   1392  N   SER   226     -14.231  35.749 -62.639  1.00 55.19           N  
ATOM   1393  CA  SER   226     -13.462  34.553 -62.861  1.00 55.19           C  
ATOM   1394  C   SER   226     -14.398  33.378 -62.938  1.00 55.19           C  
ATOM   1395  O   SER   226     -15.529  33.423 -62.460  1.00 55.19           O  
ATOM   1396  CB  SER   226     -12.459  34.248 -61.739  1.00 55.19           C  
ATOM   1397  OG  SER   226     -11.744  33.056 -62.028  1.00 55.19           O  
ATOM   1398  N   VAL   227     -13.906  32.270 -63.529  1.00 47.86           N  
ATOM   1399  CA  VAL   227     -14.619  31.035 -63.684  1.00 47.86           C  
ATOM   1400  C   VAL   227     -14.910  30.502 -62.315  1.00 47.86           C  
ATOM   1401  O   VAL   227     -15.897  29.801 -62.103  1.00 47.86           O  
ATOM   1402  CB  VAL   227     -13.821  29.982 -64.394  1.00 47.86           C  
ATOM   1403  CG1 VAL   227     -14.606  28.661 -64.346  1.00 47.86           C  
ATOM   1404  CG2 VAL   227     -13.510  30.478 -65.814  1.00 47.86           C  
ATOM   1405  N   ASN   228     -14.039  30.833 -61.346  1.00 85.44           N  
ATOM   1406  CA  ASN   228     -14.107  30.348 -59.996  1.00 85.44           C  
ATOM   1407  C   ASN   228     -15.421  30.737 -59.382  1.00 85.44           C  
ATOM   1408  O   ASN   228     -15.948  30.027 -58.526  1.00 85.44           O  
ATOM   1409  CB  ASN   228     -12.976  30.920 -59.118  1.00 85.44           C  
ATOM   1410  CG  ASN   228     -12.848  30.081 -57.853  1.00 85.44           C  
ATOM   1411  ND2 ASN   228     -11.702  30.235 -57.137  1.00 85.44           N  
ATOM   1412  OD1 ASN   228     -13.741  29.310 -57.507  1.00 85.44           O  
ATOM   1413  N   ALA   229     -15.983  31.894 -59.767  1.00 52.57           N  
ATOM   1414  CA  ALA   229     -17.238  32.296 -59.198  1.00 52.57           C  
ATOM   1415  C   ALA   229     -18.282  31.275 -59.550  1.00 52.57           C  
ATOM   1416  O   ALA   229     -19.151  30.974 -58.733  1.00 52.57           O  
ATOM   1417  CB  ALA   229     -17.732  33.647 -59.748  1.00 52.57           C  
ATOM   1418  N   TYR   230     -18.278  30.787 -60.807  1.00158.85           N  
ATOM   1419  CA  TYR   230     -19.251  29.829 -61.259  1.00158.85           C  
ATOM   1420  C   TYR   230     -19.000  28.428 -60.768  1.00158.85           C  
ATOM   1421  O   TYR   230     -19.911  27.775 -60.261  1.00158.85           O  
ATOM   1422  CB  TYR   230     -19.322  29.821 -62.792  1.00158.85           C  
ATOM   1423  CG  TYR   230     -19.734  31.214 -63.137  1.00158.85           C  
ATOM   1424  CD1 TYR   230     -18.787  32.207 -63.241  1.00158.85           C  
ATOM   1425  CD2 TYR   230     -21.060  31.535 -63.321  1.00158.85           C  
ATOM   1426  CE1 TYR   230     -19.150  33.498 -63.544  1.00158.85           C  
ATOM   1427  CE2 TYR   230     -21.427  32.825 -63.624  1.00158.85           C  
ATOM   1428  CZ  TYR   230     -20.474  33.808 -63.738  1.00158.85           C  
ATOM   1429  OH  TYR   230     -20.855  35.130 -64.048  1.00158.85           O  
ATOM   1430  N   LYS   231     -17.772  27.905 -60.984  0.80 94.58           N  
ATOM   1431  CA  LYS   231     -17.409  26.560 -60.606  0.80 94.58           C  
ATOM   1432  C   LYS   231     -17.051  26.400 -59.154  0.80 94.58           C  
ATOM   1433  O   LYS   231     -17.438  25.422 -58.515  0.80 94.58           O  
ATOM   1434  CB  LYS   231     -16.269  25.972 -61.456  0.80 94.58           C  
ATOM   1435  CG  LYS   231     -16.721  25.628 -62.880  0.80 94.58           C  
ATOM   1436  CD  LYS   231     -15.599  25.165 -63.813  0.80 94.58           C  
ATOM   1437  CE  LYS   231     -16.106  24.721 -65.187  1.00 94.58           C  
ATOM   1438  NZ  LYS   231     -17.154  23.689 -65.028  1.00 94.58           N1+
ATOM   1439  N   GLY   232     -16.289  27.354 -58.588  1.00 32.44           N  
ATOM   1440  CA  GLY   232     -15.821  27.207 -57.239  1.00 32.44           C  
ATOM   1441  C   GLY   232     -14.428  26.661 -57.333  1.00 32.44           C  
ATOM   1442  O   GLY   232     -14.076  26.034 -58.332  1.00 32.44           O  
ATOM   1443  N   ASN   233     -13.584  26.926 -56.307  1.00 56.39           N  
ATOM   1444  CA  ASN   233     -12.244  26.403 -56.280  1.00 56.39           C  
ATOM   1445  C   ASN   233     -11.919  26.110 -54.842  1.00 56.39           C  
ATOM   1446  O   ASN   233     -11.998  26.983 -53.978  1.00 56.39           O  
ATOM   1447  CB  ASN   233     -11.195  27.393 -56.814  1.00 56.39           C  
ATOM   1448  CG  ASN   233      -9.902  26.626 -57.050  1.00 56.39           C  
ATOM   1449  ND2 ASN   233      -9.135  27.039 -58.096  1.00 56.39           N  
ATOM   1450  OD1 ASN   233      -9.582  25.683 -56.326  1.00 56.39           O  
ATOM   1451  N   ALA   234     -11.509  24.860 -54.558  1.00 41.52           N  
ATOM   1452  CA  ALA   234     -11.264  24.403 -53.218  1.00 41.52           C  
ATOM   1453  C   ALA   234     -10.145  25.157 -52.554  1.00 41.52           C  
ATOM   1454  O   ALA   234     -10.225  25.459 -51.364  1.00 41.52           O  
ATOM   1455  CB  ALA   234     -10.890  22.912 -53.166  1.00 41.52           C  
ATOM   1456  N   SER   235      -9.047  25.427 -53.288  1.00 79.72           N  
ATOM   1457  CA  SER   235      -7.877  26.075 -52.739  1.00 79.72           C  
ATOM   1458  C   SER   235      -8.035  27.573 -52.599  1.00 79.72           C  
ATOM   1459  O   SER   235      -7.298  28.222 -51.858  1.00 79.72           O  
ATOM   1460  CB  SER   235      -6.628  25.819 -53.597  1.00 79.72           C  
ATOM   1461  OG  SER   235      -6.811  26.358 -54.898  1.00 79.72           O  
ATOM   1462  N   LEU   236      -8.890  28.158 -53.446  1.00177.12           N  
ATOM   1463  CA  LEU   236      -9.263  29.537 -53.634  1.00177.12           C  
ATOM   1464  C   LEU   236     -10.447  30.072 -52.871  1.00177.12           C  
ATOM   1465  O   LEU   236     -11.079  31.000 -53.381  1.00177.12           O  
ATOM   1466  CB  LEU   236      -9.407  29.923 -55.110  1.00177.12           C  
ATOM   1467  CG  LEU   236      -8.043  29.879 -55.817  1.00177.12           C  
ATOM   1468  CD1 LEU   236      -8.124  30.440 -57.246  1.00177.12           C  
ATOM   1469  CD2 LEU   236      -6.957  30.556 -54.962  1.00177.12           C  
ATOM   1470  N   LEU   237     -10.903  29.476 -51.759  1.00159.39           N  
ATOM   1471  CA  LEU   237     -12.179  29.839 -51.184  1.00159.39           C  
ATOM   1472  C   LEU   237     -12.379  31.330 -50.990  1.00159.39           C  
ATOM   1473  O   LEU   237     -13.420  31.849 -51.388  1.00159.39           O  
ATOM   1474  CB  LEU   237     -12.381  29.188 -49.807  1.00159.39           C  
ATOM   1475  CG  LEU   237     -13.781  29.408 -49.208  1.00159.39           C  
ATOM   1476  CD1 LEU   237     -14.847  28.630 -49.995  1.00159.39           C  
ATOM   1477  CD2 LEU   237     -13.796  29.092 -47.704  1.00159.39           C  
ATOM   1478  N   ASP   238     -11.437  32.076 -50.379  1.00 67.17           N  
ATOM   1479  CA  ASP   238     -11.657  33.489 -50.169  1.00 67.17           C  
ATOM   1480  C   ASP   238     -11.732  34.241 -51.473  1.00 67.17           C  
ATOM   1481  O   ASP   238     -12.627  35.061 -51.681  1.00 67.17           O  
ATOM   1482  CB  ASP   238     -10.591  34.118 -49.245  1.00 67.17           C  
ATOM   1483  CG  ASP   238      -9.178  33.858 -49.768  1.00 67.17           C  
ATOM   1484  OD1 ASP   238      -9.017  33.048 -50.718  1.00 67.17           O  
ATOM   1485  OD2 ASP   238      -8.227  34.455 -49.193  1.00 67.17           O1-
ATOM   1486  N   TYR   239     -10.806  33.944 -52.402  1.00 69.29           N  
ATOM   1487  CA  TYR   239     -10.679  34.574 -53.687  1.00 69.29           C  
ATOM   1488  C   TYR   239     -11.934  34.328 -54.469  1.00 69.29           C  
ATOM   1489  O   TYR   239     -12.472  35.240 -55.096  1.00 69.29           O  
ATOM   1490  CB  TYR   239      -9.487  33.962 -54.456  1.00 69.29           C  
ATOM   1491  CG  TYR   239      -9.390  34.451 -55.865  1.00 69.29           C  
ATOM   1492  CD1 TYR   239      -8.869  35.689 -56.164  1.00 69.29           C  
ATOM   1493  CD2 TYR   239      -9.794  33.640 -56.901  1.00 69.29           C  
ATOM   1494  CE1 TYR   239      -8.771  36.115 -57.471  1.00 69.29           C  
ATOM   1495  CE2 TYR   239      -9.698  34.059 -58.208  1.00 69.29           C  
ATOM   1496  CZ  TYR   239      -9.187  35.300 -58.496  1.00 69.29           C  
ATOM   1497  OH  TYR   239      -9.085  35.728 -59.838  1.00 69.29           O  
ATOM   1498  N   THR   240     -12.452  33.086 -54.440  1.00 99.89           N  
ATOM   1499  CA  THR   240     -13.627  32.769 -55.200  1.00 99.89           C  
ATOM   1500  C   THR   240     -14.776  33.576 -54.681  1.00 99.89           C  
ATOM   1501  O   THR   240     -15.629  34.015 -55.451  1.00 99.89           O  
ATOM   1502  CB  THR   240     -14.005  31.317 -55.160  1.00 99.89           C  
ATOM   1503  CG2 THR   240     -14.480  30.942 -53.747  1.00 99.89           C  
ATOM   1504  OG1 THR   240     -15.037  31.064 -56.102  1.00 99.89           O  
ATOM   1505  N   ALA   241     -14.829  33.789 -53.352  1.00 28.41           N  
ATOM   1506  CA  ALA   241     -15.905  34.531 -52.762  1.00 28.41           C  
ATOM   1507  C   ALA   241     -15.885  35.925 -53.316  1.00 28.41           C  
ATOM   1508  O   ALA   241     -16.938  36.481 -53.620  1.00 28.41           O  
ATOM   1509  CB  ALA   241     -15.787  34.632 -51.231  1.00 28.41           C  
ATOM   1510  N   THR   242     -14.691  36.533 -53.471  1.00 43.55           N  
ATOM   1511  CA  THR   242     -14.634  37.883 -53.963  1.00 43.55           C  
ATOM   1512  C   THR   242     -15.143  37.922 -55.374  1.00 43.55           C  
ATOM   1513  O   THR   242     -15.816  38.874 -55.768  1.00 43.55           O  
ATOM   1514  CB  THR   242     -13.256  38.492 -53.938  1.00 43.55           C  
ATOM   1515  CG2 THR   242     -12.724  38.448 -52.494  1.00 43.55           C  
ATOM   1516  OG1 THR   242     -12.377  37.800 -54.811  1.00 43.55           O  
ATOM   1517  N   LYS   243     -14.818  36.893 -56.182  1.00100.87           N  
ATOM   1518  CA  LYS   243     -15.252  36.839 -57.552  1.00100.87           C  
ATOM   1519  C   LYS   243     -16.742  36.708 -57.631  1.00100.87           C  
ATOM   1520  O   LYS   243     -17.370  37.268 -58.530  1.00100.87           O  
ATOM   1521  CB  LYS   243     -14.630  35.675 -58.343  1.00100.87           C  
ATOM   1522  CG  LYS   243     -13.167  35.932 -58.694  1.00100.87           C  
ATOM   1523  CD  LYS   243     -12.988  37.218 -59.505  1.00100.87           C  
ATOM   1524  CE  LYS   243     -11.530  37.617 -59.726  1.00100.87           C  
ATOM   1525  NZ  LYS   243     -11.471  38.914 -60.440  1.00100.87           N1+
ATOM   1526  N   GLY   244     -17.356  35.937 -56.718  1.00 20.37           N  
ATOM   1527  CA  GLY   244     -18.786  35.790 -56.731  1.00 20.37           C  
ATOM   1528  C   GLY   244     -19.388  37.132 -56.452  1.00 20.37           C  
ATOM   1529  O   GLY   244     -20.428  37.492 -57.002  1.00 20.37           O  
ATOM   1530  N   ALA   245     -18.744  37.896 -55.552  1.00 26.52           N  
ATOM   1531  CA  ALA   245     -19.221  39.195 -55.176  1.00 26.52           C  
ATOM   1532  C   ALA   245     -19.200  40.084 -56.383  1.00 26.52           C  
ATOM   1533  O   ALA   245     -20.103  40.895 -56.580  1.00 26.52           O  
ATOM   1534  CB  ALA   245     -18.359  39.847 -54.082  1.00 26.52           C  
ATOM   1535  N   ILE   246     -18.154  39.958 -57.224  1.00 46.61           N  
ATOM   1536  CA  ILE   246     -18.033  40.773 -58.401  1.00 46.61           C  
ATOM   1537  C   ILE   246     -19.163  40.480 -59.337  1.00 46.61           C  
ATOM   1538  O   ILE   246     -19.722  41.390 -59.950  1.00 46.61           O  
ATOM   1539  CB  ILE   246     -16.756  40.531 -59.156  1.00 46.61           C  
ATOM   1540  CG1 ILE   246     -15.538  40.969 -58.324  1.00 46.61           C  
ATOM   1541  CG2 ILE   246     -16.864  41.235 -60.518  1.00 46.61           C  
ATOM   1542  CD1 ILE   246     -14.204  40.536 -58.936  1.00 46.61           C  
ATOM   1543  N   VAL   247     -19.522  39.192 -59.499  1.00106.74           N  
ATOM   1544  CA  VAL   247     -20.560  38.879 -60.436  1.00106.74           C  
ATOM   1545  C   VAL   247     -21.858  39.497 -59.990  1.00106.74           C  
ATOM   1546  O   VAL   247     -22.587  40.063 -60.805  1.00106.74           O  
ATOM   1547  CB  VAL   247     -20.749  37.405 -60.669  1.00106.74           C  
ATOM   1548  CG1 VAL   247     -21.600  36.787 -59.546  1.00106.74           C  
ATOM   1549  CG2 VAL   247     -21.320  37.224 -62.081  1.00106.74           C  
ATOM   1550  N   ALA   248     -22.185  39.413 -58.683  1.00 25.42           N  
ATOM   1551  CA  ALA   248     -23.416  39.970 -58.187  1.00 25.42           C  
ATOM   1552  C   ALA   248     -23.379  41.452 -58.371  1.00 25.42           C  
ATOM   1553  O   ALA   248     -24.376  42.073 -58.736  1.00 25.42           O  
ATOM   1554  CB  ALA   248     -23.639  39.697 -56.689  1.00 25.42           C  
ATOM   1555  N   PHE   249     -22.205  42.052 -58.124  1.00 59.15           N  
ATOM   1556  CA  PHE   249     -22.024  43.469 -58.224  1.00 59.15           C  
ATOM   1557  C   PHE   249     -22.335  43.893 -59.624  1.00 59.15           C  
ATOM   1558  O   PHE   249     -23.043  44.876 -59.842  1.00 59.15           O  
ATOM   1559  CB  PHE   249     -20.573  43.867 -57.906  1.00 59.15           C  
ATOM   1560  CG  PHE   249     -20.387  45.300 -58.252  1.00 59.15           C  
ATOM   1561  CD1 PHE   249     -20.925  46.289 -57.464  1.00 59.15           C  
ATOM   1562  CD2 PHE   249     -19.656  45.652 -59.364  1.00 59.15           C  
ATOM   1563  CE1 PHE   249     -20.749  47.612 -57.790  1.00 59.15           C  
ATOM   1564  CE2 PHE   249     -19.475  46.973 -59.694  1.00 59.15           C  
ATOM   1565  CZ  PHE   249     -20.023  47.956 -58.906  1.00 59.15           C  
ATOM   1566  N   THR   250     -21.821  43.144 -60.617  1.00118.36           N  
ATOM   1567  CA  THR   250     -22.024  43.517 -61.987  1.00118.36           C  
ATOM   1568  C   THR   250     -23.480  43.462 -62.324  1.00118.36           C  
ATOM   1569  O   THR   250     -23.995  44.333 -63.021  1.00118.36           O  
ATOM   1570  CB  THR   250     -21.269  42.654 -62.964  1.00118.36           C  
ATOM   1571  CG2 THR   250     -19.772  42.736 -62.637  1.00118.36           C  
ATOM   1572  OG1 THR   250     -21.700  41.307 -62.885  1.00118.36           O  
ATOM   1573  N   ARG   251     -24.181  42.421 -61.847  1.00 56.00           N  
ATOM   1574  CA  ARG   251     -25.569  42.241 -62.158  1.00 56.00           C  
ATOM   1575  C   ARG   251     -26.388  43.361 -61.575  1.00 56.00           C  
ATOM   1576  O   ARG   251     -27.218  43.955 -62.260  1.00 56.00           O  
ATOM   1577  CB  ARG   251     -26.076  40.907 -61.585  1.00 56.00           C  
ATOM   1578  CG  ARG   251     -25.268  39.724 -62.126  1.00 56.00           C  
ATOM   1579  CD  ARG   251     -25.424  38.427 -61.330  1.00 56.00           C  
ATOM   1580  NE  ARG   251     -24.578  37.400 -61.999  1.00 56.00           N  
ATOM   1581  CZ  ARG   251     -25.113  36.630 -62.991  1.00 56.00           C  
ATOM   1582  NH1 ARG   251     -26.426  36.780 -63.324  1.00 56.00           N1+
ATOM   1583  NH2 ARG   251     -24.340  35.719 -63.652  1.00 56.00           N  
ATOM   1584  N   GLY   252     -26.162  43.689 -60.288  1.00 21.93           N  
ATOM   1585  CA  GLY   252     -26.948  44.699 -59.635  1.00 21.93           C  
ATOM   1586  C   GLY   252     -26.690  46.047 -60.231  1.00 21.93           C  
ATOM   1587  O   GLY   252     -27.612  46.837 -60.430  1.00 21.93           O  
ATOM   1588  N   LEU   253     -25.410  46.348 -60.516  1.00 50.79           N  
ATOM   1589  CA  LEU   253     -25.043  47.646 -60.998  1.00 50.79           C  
ATOM   1590  C   LEU   253     -25.635  47.864 -62.354  1.00 50.79           C  
ATOM   1591  O   LEU   253     -26.052  48.973 -62.679  1.00 50.79           O  
ATOM   1592  CB  LEU   253     -23.524  47.854 -61.112  1.00 50.79           C  
ATOM   1593  CG  LEU   253     -23.151  49.323 -61.376  1.00 50.79           C  
ATOM   1594  CD1 LEU   253     -23.558  50.204 -60.184  1.00 50.79           C  
ATOM   1595  CD2 LEU   253     -21.664  49.481 -61.729  1.00 50.79           C  
ATOM   1596  N   ALA   254     -25.684  46.812 -63.192  1.00 30.21           N  
ATOM   1597  CA  ALA   254     -26.185  46.976 -64.526  1.00 30.21           C  
ATOM   1598  C   ALA   254     -27.601  47.443 -64.462  1.00 30.21           C  
ATOM   1599  O   ALA   254     -28.004  48.328 -65.213  1.00 30.21           O  
ATOM   1600  CB  ALA   254     -26.167  45.667 -65.337  1.00 30.21           C  
ATOM   1601  N   LEU   255     -28.407  46.852 -63.567  1.00 84.84           N  
ATOM   1602  CA  LEU   255     -29.776  47.262 -63.469  1.00 84.84           C  
ATOM   1603  C   LEU   255     -29.864  48.652 -62.922  1.00 84.84           C  
ATOM   1604  O   LEU   255     -30.742  49.418 -63.315  1.00 84.84           O  
ATOM   1605  CB  LEU   255     -30.644  46.300 -62.645  1.00 84.84           C  
ATOM   1606  CG  LEU   255     -30.880  44.975 -63.396  1.00 84.84           C  
ATOM   1607  CD1 LEU   255     -29.555  44.249 -63.680  1.00 84.84           C  
ATOM   1608  CD2 LEU   255     -31.903  44.085 -62.673  1.00 84.84           C  
ATOM   1609  N   GLN   256     -28.967  49.023 -61.992  1.00139.46           N  
ATOM   1610  CA  GLN   256     -29.070  50.327 -61.399  1.00139.46           C  
ATOM   1611  C   GLN   256     -28.910  51.381 -62.459  1.00139.46           C  
ATOM   1612  O   GLN   256     -29.738  52.281 -62.585  1.00139.46           O  
ATOM   1613  CB  GLN   256     -27.932  50.597 -60.396  1.00139.46           C  
ATOM   1614  CG  GLN   256     -27.845  49.611 -59.228  1.00139.46           C  
ATOM   1615  CD  GLN   256     -28.670  50.143 -58.065  1.00139.46           C  
ATOM   1616  NE2 GLN   256     -29.503  51.184 -58.333  1.00139.46           N  
ATOM   1617  OE1 GLN   256     -28.567  49.650 -56.943  1.00139.46           O  
ATOM   1618  N   LEU   257     -27.822  51.264 -63.241  1.00160.84           N  
ATOM   1619  CA  LEU   257     -27.331  52.175 -64.244  1.00160.84           C  
ATOM   1620  C   LEU   257     -28.030  52.175 -65.574  1.00160.84           C  
ATOM   1621  O   LEU   257     -27.831  53.100 -66.360  1.00160.84           O  
ATOM   1622  CB  LEU   257     -25.817  52.038 -64.463  1.00160.84           C  
ATOM   1623  CG  LEU   257     -25.025  52.612 -63.270  1.00160.84           C  
ATOM   1624  CD1 LEU   257     -25.253  51.789 -61.999  1.00160.84           C  
ATOM   1625  CD2 LEU   257     -23.539  52.790 -63.582  1.00160.84           C  
ATOM   1626  N   ALA   258     -28.829  51.145 -65.898  1.00 46.72           N  
ATOM   1627  CA  ALA   258     -29.337  50.998 -67.237  1.00 46.72           C  
ATOM   1628  C   ALA   258     -30.061  52.228 -67.706  1.00 46.72           C  
ATOM   1629  O   ALA   258     -29.895  52.633 -68.856  1.00 46.72           O  
ATOM   1630  CB  ALA   258     -30.317  49.819 -67.362  1.00 46.72           C  
ATOM   1631  N   GLU   259     -30.874  52.865 -66.847  1.00 83.01           N  
ATOM   1632  CA  GLU   259     -31.625  54.022 -67.252  1.00 83.01           C  
ATOM   1633  C   GLU   259     -30.679  55.130 -67.611  1.00 83.01           C  
ATOM   1634  O   GLU   259     -30.965  55.946 -68.487  1.00 83.01           O  
ATOM   1635  CB  GLU   259     -32.579  54.512 -66.150  1.00 83.01           C  
ATOM   1636  CG  GLU   259     -31.867  54.871 -64.845  1.00 83.01           C  
ATOM   1637  CD  GLU   259     -32.926  55.199 -63.804  1.00 83.01           C  
ATOM   1638  OE1 GLU   259     -34.135  55.024 -64.111  1.00 83.01           O  
ATOM   1639  OE2 GLU   259     -32.539  55.629 -62.685  1.00 83.01           O1-
ATOM   1640  N   LYS   260     -29.531  55.181 -66.910  1.00152.45           N  
ATOM   1641  CA  LYS   260     -28.487  56.156 -67.061  1.00152.45           C  
ATOM   1642  C   LYS   260     -27.851  56.013 -68.413  1.00152.45           C  
ATOM   1643  O   LYS   260     -27.231  56.949 -68.917  1.00152.45           O  
ATOM   1644  CB  LYS   260     -27.382  55.983 -66.011  1.00152.45           C  
ATOM   1645  CG  LYS   260     -27.816  56.251 -64.572  1.00152.45           C  
ATOM   1646  CD  LYS   260     -28.110  57.721 -64.283  1.00152.45           C  
ATOM   1647  CE  LYS   260     -26.989  58.420 -63.510  1.00152.45           C  
ATOM   1648  NZ  LYS   260     -26.981  57.952 -62.105  1.00152.45           N1+
ATOM   1649  N   GLY   261     -27.926  54.816 -69.024  1.00 39.85           N  
ATOM   1650  CA  GLY   261     -27.342  54.668 -70.324  1.00 39.85           C  
ATOM   1651  C   GLY   261     -25.947  54.145 -70.185  1.00 39.85           C  
ATOM   1652  O   GLY   261     -25.162  54.217 -71.131  1.00 39.85           O  
ATOM   1653  N   ILE   262     -25.575  53.626 -68.998  1.00196.89           N  
ATOM   1654  CA  ILE   262     -24.262  53.049 -68.930  1.00196.89           C  
ATOM   1655  C   ILE   262     -24.395  51.575 -68.757  1.00196.89           C  
ATOM   1656  O   ILE   262     -25.145  51.089 -67.910  1.00196.89           O  
ATOM   1657  CB  ILE   262     -23.346  53.523 -67.838  1.00196.89           C  
ATOM   1658  CG1 ILE   262     -23.923  53.280 -66.456  1.00196.89           C  
ATOM   1659  CG2 ILE   262     -23.099  55.006 -68.064  1.00196.89           C  
ATOM   1660  CD1 ILE   262     -24.965  54.328 -66.108  1.00196.89           C  
ATOM   1661  N   ARG   263     -23.664  50.824 -69.600  1.00 82.22           N  
ATOM   1662  CA  ARG   263     -23.736  49.394 -69.565  1.00 82.22           C  
ATOM   1663  C   ARG   263     -22.688  48.881 -68.623  1.00 82.22           C  
ATOM   1664  O   ARG   263     -21.628  49.486 -68.461  1.00 82.22           O  
ATOM   1665  CB  ARG   263     -23.484  48.736 -70.928  1.00 82.22           C  
ATOM   1666  CG  ARG   263     -24.361  49.306 -72.043  1.00 82.22           C  
ATOM   1667  CD  ARG   263     -24.259  48.504 -73.342  1.00 82.22           C  
ATOM   1668  NE  ARG   263     -22.812  48.248 -73.583  1.00 82.22           N  
ATOM   1669  CZ  ARG   263     -22.055  49.095 -74.338  1.00 82.22           C  
ATOM   1670  NH1 ARG   263     -22.616  50.193 -74.922  1.00 82.22           N1+
ATOM   1671  NH2 ARG   263     -20.729  48.829 -74.507  1.00 82.22           N  
ATOM   1672  N   VAL   264     -22.984  47.738 -67.967  1.00 68.71           N  
ATOM   1673  CA  VAL   264     -22.063  47.116 -67.056  1.00 68.71           C  
ATOM   1674  C   VAL   264     -22.046  45.645 -67.353  1.00 68.71           C  
ATOM   1675  O   VAL   264     -23.083  44.983 -67.313  1.00 68.71           O  
ATOM   1676  CB  VAL   264     -22.490  47.265 -65.625  1.00 68.71           C  
ATOM   1677  CG1 VAL   264     -21.482  46.541 -64.718  1.00 68.71           C  
ATOM   1678  CG2 VAL   264     -22.657  48.767 -65.329  1.00 68.71           C  
ATOM   1679  N   ASN   265     -20.850  45.085 -67.628  1.00 56.81           N  
ATOM   1680  CA  ASN   265     -20.765  43.694 -67.972  1.00 56.81           C  
ATOM   1681  C   ASN   265     -19.486  43.163 -67.410  1.00 56.81           C  
ATOM   1682  O   ASN   265     -18.682  43.907 -66.852  1.00 56.81           O  
ATOM   1683  CB  ASN   265     -20.731  43.455 -69.491  1.00 56.81           C  
ATOM   1684  CG  ASN   265     -22.070  43.891 -70.080  1.00 56.81           C  
ATOM   1685  ND2 ASN   265     -22.046  44.961 -70.923  1.00 56.81           N  
ATOM   1686  OD1 ASN   265     -23.109  43.298 -69.797  1.00 56.81           O  
ATOM   1687  N   GLY   266     -19.267  41.837 -67.539  1.00 32.17           N  
ATOM   1688  CA  GLY   266     -18.061  41.292 -66.989  1.00 32.17           C  
ATOM   1689  C   GLY   266     -17.500  40.243 -67.894  1.00 32.17           C  
ATOM   1690  O   GLY   266     -18.134  39.804 -68.853  1.00 32.17           O  
ATOM   1691  N   VAL   267     -16.248  39.841 -67.599  1.00 53.79           N  
ATOM   1692  CA  VAL   267     -15.564  38.794 -68.306  1.00 53.79           C  
ATOM   1693  C   VAL   267     -15.084  37.822 -67.261  1.00 53.79           C  
ATOM   1694  O   VAL   267     -14.522  38.235 -66.248  1.00 53.79           O  
ATOM   1695  CB  VAL   267     -14.342  39.281 -69.033  1.00 53.79           C  
ATOM   1696  CG1 VAL   267     -13.652  38.079 -69.694  1.00 53.79           C  
ATOM   1697  CG2 VAL   267     -14.757  40.390 -70.013  1.00 53.79           C  
ATOM   1698  N   ALA   268     -15.313  36.502 -67.465  1.00 59.40           N  
ATOM   1699  CA  ALA   268     -14.824  35.547 -66.503  1.00 59.40           C  
ATOM   1700  C   ALA   268     -13.805  34.682 -67.182  1.00 59.40           C  
ATOM   1701  O   ALA   268     -14.132  33.760 -67.931  1.00 59.40           O  
ATOM   1702  CB  ALA   268     -15.916  34.611 -65.956  1.00 59.40           C  
ATOM   1703  N   PRO   269     -12.563  34.944 -66.898  1.00 79.53           N  
ATOM   1704  CA  PRO   269     -11.523  34.178 -67.532  1.00 79.53           C  
ATOM   1705  C   PRO   269     -11.317  32.847 -66.884  1.00 79.53           C  
ATOM   1706  O   PRO   269     -11.677  32.678 -65.721  1.00 79.53           O  
ATOM   1707  CB  PRO   269     -10.264  35.040 -67.460  1.00 79.53           C  
ATOM   1708  CG  PRO   269     -10.801  36.478 -67.377  1.00 79.53           C  
ATOM   1709  CD  PRO   269     -12.161  36.327 -66.683  1.00 79.53           C  
ATOM   1710  N   GLY   270     -10.739  31.892 -67.635  1.00 46.88           N  
ATOM   1711  CA  GLY   270     -10.366  30.618 -67.101  1.00 46.88           C  
ATOM   1712  C   GLY   270      -8.914  30.760 -66.765  1.00 46.88           C  
ATOM   1713  O   GLY   270      -8.467  31.856 -66.433  1.00 46.88           O  
ATOM   1714  N   PRO   271      -8.160  29.694 -66.805  1.00101.18           N  
ATOM   1715  CA  PRO   271      -6.752  29.796 -66.533  1.00101.18           C  
ATOM   1716  C   PRO   271      -6.030  30.509 -67.636  1.00101.18           C  
ATOM   1717  O   PRO   271      -5.956  29.978 -68.744  1.00101.18           O  
ATOM   1718  CB  PRO   271      -6.272  28.366 -66.259  1.00101.18           C  
ATOM   1719  CG  PRO   271      -7.448  27.462 -66.685  1.00101.18           C  
ATOM   1720  CD  PRO   271      -8.678  28.367 -66.527  1.00101.18           C  
ATOM   1721  N   ILE   272      -5.427  31.677 -67.331  1.00104.81           N  
ATOM   1722  CA  ILE   272      -4.692  32.443 -68.299  1.00104.81           C  
ATOM   1723  C   ILE   272      -3.325  32.660 -67.750  1.00104.81           C  
ATOM   1724  O   ILE   272      -3.153  32.926 -66.561  1.00104.81           O  
ATOM   1725  CB  ILE   272      -5.304  33.784 -68.612  1.00104.81           C  
ATOM   1726  CG1 ILE   272      -6.550  33.615 -69.500  1.00104.81           C  
ATOM   1727  CG2 ILE   272      -4.225  34.667 -69.260  1.00104.81           C  
ATOM   1728  CD1 ILE   272      -7.674  32.803 -68.877  1.00104.81           C  
ATOM   1729  N   TRP   273      -2.308  32.556 -68.625  1.00 98.60           N  
ATOM   1730  CA  TRP   273      -0.946  32.639 -68.185  1.00 98.60           C  
ATOM   1731  C   TRP   273      -0.576  34.076 -67.976  1.00 98.60           C  
ATOM   1732  O   TRP   273      -0.357  34.827 -68.926  1.00 98.60           O  
ATOM   1733  CB  TRP   273       0.005  31.955 -69.189  1.00 98.60           C  
ATOM   1734  CG  TRP   273       1.463  31.910 -68.813  1.00 98.60           C  
ATOM   1735  CD1 TRP   273       2.530  32.519 -69.405  1.00 98.60           C  
ATOM   1736  CD2 TRP   273       1.980  31.190 -67.681  1.00 98.60           C  
ATOM   1737  CE2 TRP   273       3.359  31.391 -67.661  1.00 98.60           C  
ATOM   1738  CE3 TRP   273       1.355  30.431 -66.734  1.00 98.60           C  
ATOM   1739  NE1 TRP   273       3.685  32.201 -68.728  1.00 98.60           N  
ATOM   1740  CZ2 TRP   273       4.143  30.833 -66.688  1.00 98.60           C  
ATOM   1741  CZ3 TRP   273       2.148  29.866 -65.760  1.00 98.60           C  
ATOM   1742  CH2 TRP   273       3.514  30.061 -65.736  1.00 98.60           C  
ATOM   1743  N   THR   274      -0.499  34.477 -66.686  1.00 54.19           N  
ATOM   1744  CA  THR   274      -0.192  35.827 -66.288  1.00 54.19           C  
ATOM   1745  C   THR   274       0.699  35.759 -65.073  1.00 54.19           C  
ATOM   1746  O   THR   274       0.948  34.678 -64.542  1.00 54.19           O  
ATOM   1747  CB  THR   274      -1.409  36.603 -65.872  1.00 54.19           C  
ATOM   1748  CG2 THR   274      -2.421  36.604 -67.035  1.00 54.19           C  
ATOM   1749  OG1 THR   274      -1.995  36.012 -64.720  1.00 54.19           O  
ATOM   1750  N   PRO   275       1.184  36.895 -64.616  1.00 76.42           N  
ATOM   1751  CA  PRO   275       2.049  36.960 -63.459  1.00 76.42           C  
ATOM   1752  C   PRO   275       1.363  36.534 -62.198  1.00 76.42           C  
ATOM   1753  O   PRO   275       2.040  36.265 -61.205  1.00 76.42           O  
ATOM   1754  CB  PRO   275       2.590  38.389 -63.428  1.00 76.42           C  
ATOM   1755  CG  PRO   275       2.581  38.812 -64.909  1.00 76.42           C  
ATOM   1756  CD  PRO   275       1.425  38.005 -65.529  1.00 76.42           C  
ATOM   1757  N   LEU   276       0.023  36.488 -62.196  1.00 62.42           N  
ATOM   1758  CA  LEU   276      -0.690  36.106 -61.017  1.00 62.42           C  
ATOM   1759  C   LEU   276      -0.376  34.671 -60.708  1.00 62.42           C  
ATOM   1760  O   LEU   276      -0.325  34.281 -59.542  1.00 62.42           O  
ATOM   1761  CB  LEU   276      -2.215  36.234 -61.167  1.00 62.42           C  
ATOM   1762  CG  LEU   276      -2.970  35.935 -59.861  1.00 62.42           C  
ATOM   1763  CD1 LEU   276      -2.619  36.961 -58.769  1.00 62.42           C  
ATOM   1764  CD2 LEU   276      -4.482  35.823 -60.108  1.00 62.42           C  
ATOM   1765  N   ILE   277      -0.196  33.832 -61.747  1.00 93.70           N  
ATOM   1766  CA  ILE   277      -0.026  32.418 -61.540  1.00 93.70           C  
ATOM   1767  C   ILE   277       1.263  32.046 -60.846  1.00 93.70           C  
ATOM   1768  O   ILE   277       1.197  31.432 -59.781  1.00 93.70           O  
ATOM   1769  CB  ILE   277      -0.097  31.661 -62.830  1.00 93.70           C  
ATOM   1770  CG1 ILE   277      -1.427  31.962 -63.521  1.00 93.70           C  
ATOM   1771  CG2 ILE   277       0.122  30.167 -62.550  1.00 93.70           C  
ATOM   1772  CD1 ILE   277      -1.401  31.541 -64.980  1.00 93.70           C  
ATOM   1773  N   PRO   278       2.437  32.391 -61.326  1.00100.50           N  
ATOM   1774  CA  PRO   278       3.658  31.987 -60.674  1.00100.50           C  
ATOM   1775  C   PRO   278       3.823  32.665 -59.346  1.00100.50           C  
ATOM   1776  O   PRO   278       4.613  32.201 -58.526  1.00100.50           O  
ATOM   1777  CB  PRO   278       4.784  32.282 -61.675  1.00100.50           C  
ATOM   1778  CG  PRO   278       4.154  33.243 -62.702  1.00100.50           C  
ATOM   1779  CD  PRO   278       2.662  32.878 -62.678  1.00100.50           C  
ATOM   1780  N   ALA   279       3.163  33.822 -59.159  1.00 68.69           N  
ATOM   1781  CA  ALA   279       3.204  34.554 -57.923  1.00 68.69           C  
ATOM   1782  C   ALA   279       2.413  33.868 -56.841  1.00 68.69           C  
ATOM   1783  O   ALA   279       2.733  34.013 -55.662  1.00 68.69           O  
ATOM   1784  CB  ALA   279       2.658  35.986 -58.064  1.00 68.69           C  
ATOM   1785  N   SER   280       1.262  33.258 -57.203  1.00 75.89           N  
ATOM   1786  CA  SER   280       0.394  32.606 -56.253  1.00 75.89           C  
ATOM   1787  C   SER   280       0.679  31.143 -56.004  1.00 75.89           C  
ATOM   1788  O   SER   280       0.756  30.705 -54.855  1.00 75.89           O  
ATOM   1789  CB  SER   280      -1.084  32.708 -56.662  1.00 75.89           C  
ATOM   1790  OG  SER   280      -1.304  32.007 -57.876  1.00 75.89           O  
ATOM   1791  N   PHE   281       0.823  30.346 -57.089  1.00 79.61           N  
ATOM   1792  CA  PHE   281       0.897  28.908 -56.999  1.00 79.61           C  
ATOM   1793  C   PHE   281       2.312  28.416 -56.916  1.00 79.61           C  
ATOM   1794  O   PHE   281       3.270  29.126 -57.221  1.00 79.61           O  
ATOM   1795  CB  PHE   281       0.277  28.176 -58.207  1.00 79.61           C  
ATOM   1796  CG  PHE   281      -1.185  28.465 -58.309  1.00 79.61           C  
ATOM   1797  CD1 PHE   281      -2.090  27.849 -57.475  1.00 79.61           C  
ATOM   1798  CD2 PHE   281      -1.651  29.338 -59.268  1.00 79.61           C  
ATOM   1799  CE1 PHE   281      -3.437  28.114 -57.583  1.00 79.61           C  
ATOM   1800  CE2 PHE   281      -2.996  29.607 -59.380  1.00 79.61           C  
ATOM   1801  CZ  PHE   281      -3.891  28.996 -58.535  1.00 79.61           C  
ATOM   1802  N   ASN   282       2.446  27.144 -56.479  1.00 48.58           N  
ATOM   1803  CA  ASN   282       3.701  26.457 -56.357  1.00 48.58           C  
ATOM   1804  C   ASN   282       4.169  26.079 -57.731  1.00 48.58           C  
ATOM   1805  O   ASN   282       3.407  26.119 -58.693  1.00 48.58           O  
ATOM   1806  CB  ASN   282       3.612  25.182 -55.500  1.00 48.58           C  
ATOM   1807  CG  ASN   282       2.554  24.266 -56.106  1.00 48.58           C  
ATOM   1808  ND2 ASN   282       2.963  23.030 -56.497  1.00 48.58           N  
ATOM   1809  OD1 ASN   282       1.387  24.641 -56.226  1.00 48.58           O  
ATOM   1810  N   GLU   283       5.460  25.708 -57.845  1.00 49.57           N  
ATOM   1811  CA  GLU   283       6.080  25.400 -59.102  1.00 49.57           C  
ATOM   1812  C   GLU   283       5.440  24.196 -59.721  1.00 49.57           C  
ATOM   1813  O   GLU   283       5.374  24.085 -60.944  1.00 49.57           O  
ATOM   1814  CB  GLU   283       7.586  25.112 -58.995  1.00 49.57           C  
ATOM   1815  CG  GLU   283       8.431  26.349 -58.685  1.00 49.57           C  
ATOM   1816  CD  GLU   283       9.887  25.987 -58.950  1.00 49.57           C  
ATOM   1817  OE1 GLU   283      10.341  24.934 -58.428  1.00 49.57           O  
ATOM   1818  OE2 GLU   283      10.560  26.754 -59.689  1.00 49.57           O1-
ATOM   1819  N   GLU   284       4.997  23.227 -58.905  1.00 37.17           N  
ATOM   1820  CA  GLU   284       4.406  22.040 -59.452  1.00 37.17           C  
ATOM   1821  C   GLU   284       3.133  22.403 -60.155  1.00 37.17           C  
ATOM   1822  O   GLU   284       2.902  22.008 -61.298  1.00 37.17           O  
ATOM   1823  CB  GLU   284       4.066  21.019 -58.352  1.00 37.17           C  
ATOM   1824  CG  GLU   284       3.589  19.654 -58.851  1.00 37.17           C  
ATOM   1825  CD  GLU   284       3.379  18.785 -57.618  1.00 37.17           C  
ATOM   1826  OE1 GLU   284       3.506  19.334 -56.492  1.00 37.17           O  
ATOM   1827  OE2 GLU   284       3.100  17.565 -57.779  1.00 37.17           O1-
ATOM   1828  N   LYS   285       2.286  23.205 -59.482  1.00102.21           N  
ATOM   1829  CA  LYS   285       0.996  23.600 -59.978  1.00102.21           C  
ATOM   1830  C   LYS   285       1.171  24.410 -61.224  1.00102.21           C  
ATOM   1831  O   LYS   285       0.440  24.241 -62.199  1.00102.21           O  
ATOM   1832  CB  LYS   285       0.253  24.491 -58.972  1.00102.21           C  
ATOM   1833  CG  LYS   285      -1.190  24.805 -59.353  1.00102.21           C  
ATOM   1834  CD  LYS   285      -2.123  23.605 -59.201  1.00102.21           C  
ATOM   1835  CE  LYS   285      -3.583  23.933 -59.512  1.00102.21           C  
ATOM   1836  NZ  LYS   285      -4.053  25.016 -58.622  1.00102.21           N1+
ATOM   1837  N   ILE   286       2.166  25.314 -61.225  1.00 87.88           N  
ATOM   1838  CA  ILE   286       2.364  26.197 -62.338  1.00 87.88           C  
ATOM   1839  C   ILE   286       2.686  25.393 -63.556  1.00 87.88           C  
ATOM   1840  O   ILE   286       2.210  25.696 -64.650  1.00 87.88           O  
ATOM   1841  CB  ILE   286       3.458  27.214 -62.135  1.00 87.88           C  
ATOM   1842  CG1 ILE   286       3.394  28.287 -63.228  1.00 87.88           C  
ATOM   1843  CG2 ILE   286       4.812  26.503 -62.078  1.00 87.88           C  
ATOM   1844  CD1 ILE   286       4.300  29.483 -62.944  1.00 87.88           C  
ATOM   1845  N   LYS   287       3.499  24.332 -63.403  1.00113.51           N  
ATOM   1846  CA  LYS   287       3.913  23.579 -64.553  1.00113.51           C  
ATOM   1847  C   LYS   287       2.720  23.024 -65.276  1.00113.51           C  
ATOM   1848  O   LYS   287       2.680  23.046 -66.501  1.00113.51           O  
ATOM   1849  CB  LYS   287       4.795  22.378 -64.184  1.00113.51           C  
ATOM   1850  CG  LYS   287       5.245  21.563 -65.397  1.00113.51           C  
ATOM   1851  CD  LYS   287       6.343  20.556 -65.060  1.00113.51           C  
ATOM   1852  CE  LYS   287       5.971  19.625 -63.906  1.00113.51           C  
ATOM   1853  NZ  LYS   287       7.102  18.723 -63.598  1.00113.51           N1+
ATOM   1854  N   ASN   288       1.750  22.463 -64.530  1.00 75.91           N  
ATOM   1855  CA  ASN   288       0.568  21.828 -65.057  1.00 75.91           C  
ATOM   1856  C   ASN   288      -0.534  22.778 -65.455  1.00 75.91           C  
ATOM   1857  O   ASN   288      -1.458  22.381 -66.164  1.00 75.91           O  
ATOM   1858  CB  ASN   288       0.002  20.745 -64.126  1.00 75.91           C  
ATOM   1859  CG  ASN   288       0.925  19.542 -64.279  1.00 75.91           C  
ATOM   1860  ND2 ASN   288       0.999  18.682 -63.228  1.00 75.91           N  
ATOM   1861  OD1 ASN   288       1.565  19.373 -65.314  1.00 75.91           O  
ATOM   1862  N   PHE   289      -0.487  24.035 -64.980  1.00 94.36           N  
ATOM   1863  CA  PHE   289      -1.517  25.035 -65.129  1.00 94.36           C  
ATOM   1864  C   PHE   289      -2.187  25.000 -66.485  1.00 94.36           C  
ATOM   1865  O   PHE   289      -1.541  25.039 -67.531  1.00 94.36           O  
ATOM   1866  CB  PHE   289      -0.919  26.438 -64.889  1.00 94.36           C  
ATOM   1867  CG  PHE   289      -1.962  27.500 -64.861  1.00 94.36           C  
ATOM   1868  CD1 PHE   289      -2.708  27.717 -63.726  1.00 94.36           C  
ATOM   1869  CD2 PHE   289      -2.170  28.296 -65.962  1.00 94.36           C  
ATOM   1870  CE1 PHE   289      -3.661  28.708 -63.695  1.00 94.36           C  
ATOM   1871  CE2 PHE   289      -3.121  29.287 -65.936  1.00 94.36           C  
ATOM   1872  CZ  PHE   289      -3.867  29.494 -64.803  1.00 94.36           C  
ATOM   1873  N   GLY   290      -3.543  24.910 -66.478  1.00 34.87           N  
ATOM   1874  CA  GLY   290      -4.347  24.963 -67.673  1.00 34.87           C  
ATOM   1875  C   GLY   290      -4.602  23.601 -68.245  1.00 34.87           C  
ATOM   1876  O   GLY   290      -5.298  23.479 -69.252  1.00 34.87           O  
ATOM   1877  N   SER   291      -4.052  22.544 -67.624  1.00 45.36           N  
ATOM   1878  CA  SER   291      -4.196  21.192 -68.096  1.00 45.36           C  
ATOM   1879  C   SER   291      -5.599  20.690 -67.892  1.00 45.36           C  
ATOM   1880  O   SER   291      -6.028  19.761 -68.575  1.00 45.36           O  
ATOM   1881  CB  SER   291      -3.267  20.218 -67.354  1.00 45.36           C  
ATOM   1882  OG  SER   291      -3.633  20.152 -65.983  1.00 45.36           O  
ATOM   1883  N   GLU   292      -6.336  21.277 -66.930  1.00 82.03           N  
ATOM   1884  CA  GLU   292      -7.654  20.835 -66.544  1.00 82.03           C  
ATOM   1885  C   GLU   292      -8.690  21.024 -67.625  1.00 82.03           C  
ATOM   1886  O   GLU   292      -9.555  20.167 -67.807  1.00 82.03           O  
ATOM   1887  CB  GLU   292      -8.190  21.595 -65.314  1.00 82.03           C  
ATOM   1888  CG  GLU   292      -7.457  21.288 -64.007  1.00 82.03           C  
ATOM   1889  CD  GLU   292      -8.045  20.010 -63.425  1.00 82.03           C  
ATOM   1890  OE1 GLU   292      -9.290  19.841 -63.523  1.00 82.03           O  
ATOM   1891  OE2 GLU   292      -7.265  19.191 -62.869  1.00 82.03           O1-
ATOM   1892  N   VAL   293      -8.637  22.149 -68.367  1.00 55.95           N  
ATOM   1893  CA  VAL   293      -9.672  22.518 -69.304  1.00 55.95           C  
ATOM   1894  C   VAL   293      -9.672  21.637 -70.518  1.00 55.95           C  
ATOM   1895  O   VAL   293      -8.684  20.981 -70.839  1.00 55.95           O  
ATOM   1896  CB  VAL   293      -9.577  23.950 -69.752  1.00 55.95           C  
ATOM   1897  CG1 VAL   293      -9.775  24.854 -68.521  1.00 55.95           C  
ATOM   1898  CG2 VAL   293      -8.233  24.166 -70.467  1.00 55.95           C  
ATOM   1899  N   PRO   294     -10.792  21.595 -71.202  1.00141.84           N  
ATOM   1900  CA  PRO   294     -10.957  20.770 -72.370  1.00141.84           C  
ATOM   1901  C   PRO   294      -9.987  21.107 -73.460  1.00141.84           C  
ATOM   1902  O   PRO   294      -9.619  20.219 -74.226  1.00141.84           O  
ATOM   1903  CB  PRO   294     -12.435  20.886 -72.761  1.00141.84           C  
ATOM   1904  CG  PRO   294     -12.986  22.039 -71.897  1.00141.84           C  
ATOM   1905  CD  PRO   294     -12.061  22.058 -70.670  1.00141.84           C  
ATOM   1906  N   MET   295      -9.574  22.379 -73.556  1.00 95.49           N  
ATOM   1907  CA  MET   295      -8.635  22.844 -74.536  1.00 95.49           C  
ATOM   1908  C   MET   295      -7.306  22.233 -74.200  1.00 95.49           C  
ATOM   1909  O   MET   295      -6.460  22.031 -75.070  1.00 95.49           O  
ATOM   1910  CB  MET   295      -8.506  24.377 -74.509  1.00 95.49           C  
ATOM   1911  CG  MET   295      -7.978  24.993 -75.800  1.00 95.49           C  
ATOM   1912  SD  MET   295      -8.057  26.810 -75.821  1.00 95.49           S  
ATOM   1913  CE  MET   295      -8.087  26.947 -77.632  1.00 95.49           C  
ATOM   1914  N   LYS   296      -7.098  21.945 -72.900  1.00128.55           N  
ATOM   1915  CA  LYS   296      -5.899  21.372 -72.349  1.00128.55           C  
ATOM   1916  C   LYS   296      -4.733  22.286 -72.531  1.00128.55           C  
ATOM   1917  O   LYS   296      -3.618  21.843 -72.805  1.00128.55           O  
ATOM   1918  CB  LYS   296      -5.499  19.994 -72.905  1.00128.55           C  
ATOM   1919  CG  LYS   296      -4.461  19.321 -72.002  1.00128.55           C  
ATOM   1920  CD  LYS   296      -4.144  17.858 -72.338  1.00128.55           C  
ATOM   1921  CE  LYS   296      -3.484  17.101 -71.181  1.00128.55           C  
ATOM   1922  NZ  LYS   296      -2.444  17.935 -70.535  1.00128.55           N1+
ATOM   1923  N   ARG   297      -4.971  23.600 -72.395  1.00120.63           N  
ATOM   1924  CA  ARG   297      -3.915  24.567 -72.428  1.00120.63           C  
ATOM   1925  C   ARG   297      -4.442  25.779 -71.733  1.00120.63           C  
ATOM   1926  O   ARG   297      -5.653  25.982 -71.658  1.00120.63           O  
ATOM   1927  CB  ARG   297      -3.497  24.969 -73.852  1.00120.63           C  
ATOM   1928  CG  ARG   297      -4.664  25.481 -74.695  1.00120.63           C  
ATOM   1929  CD  ARG   297      -4.245  26.173 -75.994  1.00120.63           C  
ATOM   1930  NE  ARG   297      -3.734  27.520 -75.619  1.00120.63           N  
ATOM   1931  CZ  ARG   297      -3.753  28.544 -76.524  1.00120.63           C  
ATOM   1932  NH1 ARG   297      -4.219  28.336 -77.790  1.00120.63           N1+
ATOM   1933  NH2 ARG   297      -3.315  29.781 -76.149  1.00120.63           N  
ATOM   1934  N   ALA   298      -3.545  26.599 -71.158  1.00 43.55           N  
ATOM   1935  CA  ALA   298      -3.981  27.806 -70.523  1.00 43.55           C  
ATOM   1936  C   ALA   298      -4.183  28.797 -71.618  1.00 43.55           C  
ATOM   1937  O   ALA   298      -3.637  28.640 -72.707  1.00 43.55           O  
ATOM   1938  CB  ALA   298      -2.953  28.383 -69.533  1.00 43.55           C  
ATOM   1939  N   GLY   299      -5.014  29.826 -71.374  1.00 28.62           N  
ATOM   1940  CA  GLY   299      -5.206  30.824 -72.381  1.00 28.62           C  
ATOM   1941  C   GLY   299      -4.080  31.793 -72.270  1.00 28.62           C  
ATOM   1942  O   GLY   299      -3.339  31.802 -71.289  1.00 28.62           O  
ATOM   1943  N   GLN   300      -3.924  32.635 -73.304  1.00 63.61           N  
ATOM   1944  CA  GLN   300      -2.925  33.661 -73.285  1.00 63.61           C  
ATOM   1945  C   GLN   300      -3.689  34.938 -73.199  1.00 63.61           C  
ATOM   1946  O   GLN   300      -4.840  35.006 -73.624  1.00 63.61           O  
ATOM   1947  CB  GLN   300      -2.056  33.703 -74.546  1.00 63.61           C  
ATOM   1948  CG  GLN   300      -1.140  32.485 -74.661  1.00 63.61           C  
ATOM   1949  CD  GLN   300      -0.155  32.539 -73.502  1.00 63.61           C  
ATOM   1950  NE2 GLN   300       0.332  31.347 -73.066  1.00 63.61           N  
ATOM   1951  OE1 GLN   300       0.171  33.612 -72.994  1.00 63.61           O  
ATOM   1952  N   PRO   301      -3.074  35.946 -72.657  1.00 74.80           N  
ATOM   1953  CA  PRO   301      -3.693  37.218 -72.412  1.00 74.80           C  
ATOM   1954  C   PRO   301      -4.297  37.808 -73.651  1.00 74.80           C  
ATOM   1955  O   PRO   301      -5.330  38.468 -73.559  1.00 74.80           O  
ATOM   1956  CB  PRO   301      -2.591  38.114 -71.852  1.00 74.80           C  
ATOM   1957  CG  PRO   301      -1.540  37.129 -71.301  1.00 74.80           C  
ATOM   1958  CD  PRO   301      -1.705  35.875 -72.178  1.00 74.80           C  
ATOM   1959  N   ILE   302      -3.695  37.584 -74.823  1.00148.08           N  
ATOM   1960  CA  ILE   302      -4.194  38.178 -76.029  1.00148.08           C  
ATOM   1961  C   ILE   302      -5.589  37.664 -76.257  1.00148.08           C  
ATOM   1962  O   ILE   302      -6.459  38.376 -76.751  1.00148.08           O  
ATOM   1963  CB  ILE   302      -3.334  37.847 -77.221  1.00148.08           C  
ATOM   1964  CG1 ILE   302      -3.597  38.809 -78.395  1.00148.08           C  
ATOM   1965  CG2 ILE   302      -3.522  36.357 -77.553  1.00148.08           C  
ATOM   1966  CD1 ILE   302      -4.993  38.773 -79.012  1.00148.08           C  
ATOM   1967  N   GLU   303      -5.841  36.397 -75.889  1.00 77.01           N  
ATOM   1968  CA  GLU   303      -7.099  35.748 -76.138  1.00 77.01           C  
ATOM   1969  C   GLU   303      -8.251  36.398 -75.405  1.00 77.01           C  
ATOM   1970  O   GLU   303      -9.402  36.182 -75.779  1.00 77.01           O  
ATOM   1971  CB  GLU   303      -7.069  34.241 -75.821  1.00 77.01           C  
ATOM   1972  CG  GLU   303      -6.176  33.465 -76.799  1.00 77.01           C  
ATOM   1973  CD  GLU   303      -6.208  31.982 -76.447  1.00 77.01           C  
ATOM   1974  OE1 GLU   303      -6.058  31.650 -75.239  1.00 77.01           O  
ATOM   1975  OE2 GLU   303      -6.384  31.161 -77.387  1.00 77.01           O1-
ATOM   1976  N   VAL   304      -7.998  37.086 -74.270  1.00134.67           N  
ATOM   1977  CA  VAL   304      -9.023  37.769 -73.512  1.00134.67           C  
ATOM   1978  C   VAL   304      -9.435  39.098 -74.098  1.00134.67           C  
ATOM   1979  O   VAL   304     -10.573  39.535 -73.937  1.00134.67           O  
ATOM   1980  CB  VAL   304      -8.642  38.049 -72.083  1.00134.67           C  
ATOM   1981  CG1 VAL   304      -8.314  36.722 -71.384  1.00134.67           C  
ATOM   1982  CG2 VAL   304      -7.520  39.099 -72.052  1.00134.67           C  
ATOM   1983  N   ALA   305      -8.513  39.795 -74.786  1.00 54.64           N  
ATOM   1984  CA  ALA   305      -8.710  41.172 -75.164  1.00 54.64           C  
ATOM   1985  C   ALA   305      -9.916  41.416 -76.030  1.00 54.64           C  
ATOM   1986  O   ALA   305     -10.602  42.418 -75.822  1.00 54.64           O  
ATOM   1987  CB  ALA   305      -7.501  41.757 -75.912  1.00 54.64           C  
ATOM   1988  N   PRO   306     -10.219  40.596 -76.992  1.00 70.58           N  
ATOM   1989  CA  PRO   306     -11.329  40.883 -77.863  1.00 70.58           C  
ATOM   1990  C   PRO   306     -12.654  40.912 -77.157  1.00 70.58           C  
ATOM   1991  O   PRO   306     -13.564  41.590 -77.639  1.00 70.58           O  
ATOM   1992  CB  PRO   306     -11.245  39.843 -78.978  1.00 70.58           C  
ATOM   1993  CG  PRO   306      -9.738  39.530 -79.064  1.00 70.58           C  
ATOM   1994  CD  PRO   306      -9.207  39.779 -77.641  1.00 70.58           C  
ATOM   1995  N   SER   307     -12.802  40.162 -76.048  1.00 75.72           N  
ATOM   1996  CA  SER   307     -14.033  40.140 -75.310  1.00 75.72           C  
ATOM   1997  C   SER   307     -14.223  41.496 -74.708  1.00 75.72           C  
ATOM   1998  O   SER   307     -15.328  42.038 -74.696  1.00 75.72           O  
ATOM   1999  CB  SER   307     -14.022  39.123 -74.153  1.00 75.72           C  
ATOM   2000  OG  SER   307     -15.263  39.145 -73.459  1.00 75.72           O  
ATOM   2001  N   TYR   308     -13.129  42.079 -74.183  1.00137.83           N  
ATOM   2002  CA  TYR   308     -13.170  43.381 -73.581  1.00137.83           C  
ATOM   2003  C   TYR   308     -13.524  44.399 -74.627  1.00137.83           C  
ATOM   2004  O   TYR   308     -14.333  45.291 -74.378  1.00137.83           O  
ATOM   2005  CB  TYR   308     -11.824  43.794 -72.953  1.00137.83           C  
ATOM   2006  CG  TYR   308     -11.620  43.050 -71.673  1.00137.83           C  
ATOM   2007  CD1 TYR   308     -11.035  41.803 -71.649  1.00137.83           C  
ATOM   2008  CD2 TYR   308     -12.026  43.611 -70.482  1.00137.83           C  
ATOM   2009  CE1 TYR   308     -10.853  41.136 -70.457  1.00137.83           C  
ATOM   2010  CE2 TYR   308     -11.846  42.950 -69.289  1.00137.83           C  
ATOM   2011  CZ  TYR   308     -11.259  41.710 -69.275  1.00137.83           C  
ATOM   2012  OH  TYR   308     -11.075  41.032 -68.051  1.00137.83           O  
ATOM   2013  N   VAL   309     -12.929  44.294 -75.833  1.00 46.31           N  
ATOM   2014  CA  VAL   309     -13.207  45.242 -76.875  1.00 46.31           C  
ATOM   2015  C   VAL   309     -14.665  45.175 -77.214  1.00 46.31           C  
ATOM   2016  O   VAL   309     -15.323  46.195 -77.411  1.00 46.31           O  
ATOM   2017  CB  VAL   309     -12.425  44.994 -78.125  1.00 46.31           C  
ATOM   2018  CG1 VAL   309     -12.923  45.956 -79.220  1.00 46.31           C  
ATOM   2019  CG2 VAL   309     -10.938  45.177 -77.790  1.00 46.31           C  
ATOM   2020  N   PHE   310     -15.222  43.956 -77.280  1.00 51.21           N  
ATOM   2021  CA  PHE   310     -16.605  43.808 -77.616  1.00 51.21           C  
ATOM   2022  C   PHE   310     -17.450  44.514 -76.598  1.00 51.21           C  
ATOM   2023  O   PHE   310     -18.345  45.283 -76.947  1.00 51.21           O  
ATOM   2024  CB  PHE   310     -17.042  42.335 -77.656  1.00 51.21           C  
ATOM   2025  CG  PHE   310     -18.525  42.326 -77.735  1.00 51.21           C  
ATOM   2026  CD1 PHE   310     -19.177  42.660 -78.899  1.00 51.21           C  
ATOM   2027  CD2 PHE   310     -19.263  41.967 -76.632  1.00 51.21           C  
ATOM   2028  CE1 PHE   310     -20.550  42.645 -78.951  1.00 51.21           C  
ATOM   2029  CE2 PHE   310     -20.636  41.949 -76.680  1.00 51.21           C  
ATOM   2030  CZ  PHE   310     -21.282  42.291 -77.844  1.00 51.21           C  
ATOM   2031  N   LEU   311     -17.178  44.277 -75.305  1.00 68.74           N  
ATOM   2032  CA  LEU   311     -17.963  44.855 -74.246  1.00 68.74           C  
ATOM   2033  C   LEU   311     -17.811  46.343 -74.178  1.00 68.74           C  
ATOM   2034  O   LEU   311     -18.747  47.043 -73.792  1.00 68.74           O  
ATOM   2035  CB  LEU   311     -17.599  44.331 -72.842  1.00 68.74           C  
ATOM   2036  CG  LEU   311     -18.056  42.890 -72.557  1.00 68.74           C  
ATOM   2037  CD1 LEU   311     -17.649  42.447 -71.144  1.00 68.74           C  
ATOM   2038  CD2 LEU   311     -19.565  42.733 -72.803  1.00 68.74           C  
ATOM   2039  N   ALA   312     -16.594  46.848 -74.450  1.00 58.01           N  
ATOM   2040  CA  ALA   312     -16.278  48.247 -74.357  1.00 58.01           C  
ATOM   2041  C   ALA   312     -16.938  49.082 -75.419  1.00 58.01           C  
ATOM   2042  O   ALA   312     -17.345  50.211 -75.153  1.00 58.01           O  
ATOM   2043  CB  ALA   312     -14.764  48.509 -74.458  1.00 58.01           C  
ATOM   2044  N   CYS   313     -17.023  48.568 -76.661  1.00100.20           N  
ATOM   2045  CA  CYS   313     -17.475  49.350 -77.785  1.00100.20           C  
ATOM   2046  C   CYS   313     -18.953  49.223 -77.986  1.00100.20           C  
ATOM   2047  O   CYS   313     -19.621  48.422 -77.340  1.00100.20           O  
ATOM   2048  CB  CYS   313     -16.767  48.934 -79.092  1.00100.20           C  
ATOM   2049  SG  CYS   313     -17.087  50.022 -80.517  1.00100.20           S  
ATOM   2050  N   ASN   314     -19.528  50.059 -78.877  1.00115.79           N  
ATOM   2051  CA  ASN   314     -20.926  49.895 -79.144  1.00115.79           C  
ATOM   2052  C   ASN   314     -21.006  48.946 -80.290  1.00115.79           C  
ATOM   2053  O   ASN   314     -21.778  49.136 -81.230  1.00115.79           O  
ATOM   2054  CB  ASN   314     -21.635  51.205 -79.539  1.00115.79           C  
ATOM   2055  CG  ASN   314     -21.003  51.730 -80.819  1.00115.79           C  
ATOM   2056  ND2 ASN   314     -21.723  52.645 -81.523  1.00115.79           N  
ATOM   2057  OD1 ASN   314     -19.897  51.337 -81.184  1.00115.79           O  
ATOM   2058  N   HIS   315     -20.254  47.836 -80.172  1.00156.75           N  
ATOM   2059  CA  HIS   315     -20.119  46.889 -81.236  1.00156.75           C  
ATOM   2060  C   HIS   315     -21.464  46.423 -81.620  1.00156.75           C  
ATOM   2061  O   HIS   315     -21.914  46.584 -82.749  1.00156.75           O  
ATOM   2062  CB  HIS   315     -19.315  45.659 -80.781  1.00156.75           C  
ATOM   2063  CG  HIS   315     -19.081  44.650 -81.862  1.00156.75           C  
ATOM   2064  CD2 HIS   315     -19.755  43.507 -82.165  1.00156.75           C  
ATOM   2065  ND1 HIS   315     -18.055  44.736 -82.775  1.00156.75           N  
ATOM   2066  CE1 HIS   315     -18.158  43.651 -83.582  1.00156.75           C  
ATOM   2067  NE2 HIS   315     -19.175  42.875 -83.251  1.00156.75           N  
ATOM   2068  N   CYS   316     -22.137  45.830 -80.646  1.00129.62           N  
ATOM   2069  CA  CYS   316     -23.481  45.398 -80.737  1.00129.62           C  
ATOM   2070  C   CYS   316     -23.669  45.082 -79.320  1.00129.62           C  
ATOM   2071  O   CYS   316     -24.700  44.574 -78.882  1.00129.62           O  
ATOM   2072  CB  CYS   316     -23.698  44.127 -81.579  1.00129.62           C  
ATOM   2073  SG  CYS   316     -22.941  42.638 -80.871  1.00129.62           S  
ATOM   2074  N   SER   317     -22.609  45.429 -78.556  1.00 92.74           N  
ATOM   2075  CA  SER   317     -22.715  45.209 -77.166  1.00 92.74           C  
ATOM   2076  C   SER   317     -23.659  46.247 -76.653  1.00 92.74           C  
ATOM   2077  O   SER   317     -24.060  46.211 -75.496  1.00 92.74           O  
ATOM   2078  CB  SER   317     -21.402  45.330 -76.377  1.00 92.74           C  
ATOM   2079  OG  SER   317     -21.094  46.693 -76.152  1.00 92.74           O  
ATOM   2080  N   SER   318     -24.059  47.203 -77.517  1.00 84.09           N  
ATOM   2081  CA  SER   318     -24.919  48.271 -77.100  1.00 84.09           C  
ATOM   2082  C   SER   318     -26.154  47.652 -76.530  1.00 84.09           C  
ATOM   2083  O   SER   318     -26.822  48.218 -75.666  1.00 84.09           O  
ATOM   2084  CB  SER   318     -25.342  49.182 -78.260  1.00 84.09           C  
ATOM   2085  OG  SER   318     -26.176  50.225 -77.780  1.00 84.09           O  
ATOM   2086  N   TYR   319     -26.500  46.469 -77.046  1.00 74.51           N  
ATOM   2087  CA  TYR   319     -27.634  45.715 -76.617  1.00 74.51           C  
ATOM   2088  C   TYR   319     -27.409  45.109 -75.263  1.00 74.51           C  
ATOM   2089  O   TYR   319     -28.366  44.931 -74.509  1.00 74.51           O  
ATOM   2090  CB  TYR   319     -27.988  44.595 -77.606  1.00 74.51           C  
ATOM   2091  CG  TYR   319     -29.266  43.961 -77.179  1.00 74.51           C  
ATOM   2092  CD1 TYR   319     -30.433  44.693 -77.159  1.00 74.51           C  
ATOM   2093  CD2 TYR   319     -29.309  42.628 -76.841  1.00 74.51           C  
ATOM   2094  CE1 TYR   319     -31.618  44.108 -76.781  1.00 74.51           C  
ATOM   2095  CE2 TYR   319     -30.492  42.038 -76.463  1.00 74.51           C  
ATOM   2096  CZ  TYR   319     -31.649  42.780 -76.430  1.00 74.51           C  
ATOM   2097  OH  TYR   319     -32.864  42.177 -76.046  1.00 74.51           O  
ATOM   2098  N   PHE   320     -26.150  44.750 -74.916  1.00130.87           N  
ATOM   2099  CA  PHE   320     -25.979  43.941 -73.739  1.00130.87           C  
ATOM   2100  C   PHE   320     -25.459  44.656 -72.529  1.00130.87           C  
ATOM   2101  O   PHE   320     -24.554  45.492 -72.574  1.00130.87           O  
ATOM   2102  CB  PHE   320     -25.073  42.720 -73.959  1.00130.87           C  
ATOM   2103  CG  PHE   320     -25.715  41.918 -75.037  1.00130.87           C  
ATOM   2104  CD1 PHE   320     -26.839  41.165 -74.786  1.00130.87           C  
ATOM   2105  CD2 PHE   320     -25.205  41.952 -76.314  1.00130.87           C  
ATOM   2106  CE1 PHE   320     -27.428  40.436 -75.792  1.00130.87           C  
ATOM   2107  CE2 PHE   320     -25.789  41.224 -77.321  1.00130.87           C  
ATOM   2108  CZ  PHE   320     -26.903  40.462 -77.060  1.00130.87           C  
ATOM   2109  N   THR   321     -26.079  44.308 -71.384  1.00113.29           N  
ATOM   2110  CA  THR   321     -25.659  44.774 -70.098  1.00113.29           C  
ATOM   2111  C   THR   321     -26.010  43.692 -69.117  1.00113.29           C  
ATOM   2112  O   THR   321     -26.928  42.907 -69.352  1.00113.29           O  
ATOM   2113  CB  THR   321     -26.341  46.039 -69.657  1.00113.29           C  
ATOM   2114  CG2 THR   321     -27.813  45.725 -69.343  1.00113.29           C  
ATOM   2115  OG1 THR   321     -25.696  46.575 -68.511  1.00113.29           O  
ATOM   2116  N   GLY   322     -25.261  43.611 -67.995  1.00 42.35           N  
ATOM   2117  CA  GLY   322     -25.535  42.659 -66.949  1.00 42.35           C  
ATOM   2118  C   GLY   322     -25.059  41.285 -67.330  1.00 42.35           C  
ATOM   2119  O   GLY   322     -25.464  40.307 -66.703  1.00 42.35           O  
ATOM   2120  N   GLN   323     -24.157  41.165 -68.327  1.00 69.89           N  
ATOM   2121  CA  GLN   323     -23.789  39.861 -68.824  1.00 69.89           C  
ATOM   2122  C   GLN   323     -22.367  39.522 -68.478  1.00 69.89           C  
ATOM   2123  O   GLN   323     -21.603  40.365 -68.008  1.00 69.89           O  
ATOM   2124  CB  GLN   323     -23.867  39.786 -70.358  1.00 69.89           C  
ATOM   2125  CG  GLN   323     -25.229  40.190 -70.926  1.00 69.89           C  
ATOM   2126  CD  GLN   323     -26.251  39.170 -70.457  1.00 69.89           C  
ATOM   2127  NE2 GLN   323     -27.283  39.646 -69.711  1.00 69.89           N  
ATOM   2128  OE1 GLN   323     -26.131  37.980 -70.739  1.00 69.89           O  
ATOM   2129  N   VAL   324     -21.989  38.235 -68.684  1.00106.42           N  
ATOM   2130  CA  VAL   324     -20.634  37.807 -68.463  1.00106.42           C  
ATOM   2131  C   VAL   324     -20.195  36.980 -69.638  1.00106.42           C  
ATOM   2132  O   VAL   324     -20.931  36.119 -70.115  1.00106.42           O  
ATOM   2133  CB  VAL   324     -20.454  36.984 -67.220  1.00106.42           C  
ATOM   2134  CG1 VAL   324     -20.767  37.873 -66.005  1.00106.42           C  
ATOM   2135  CG2 VAL   324     -21.339  35.732 -67.314  1.00106.42           C  
ATOM   2136  N   LEU   325     -18.971  37.230 -70.154  1.00137.82           N  
ATOM   2137  CA  LEU   325     -18.502  36.422 -71.245  1.00137.82           C  
ATOM   2138  C   LEU   325     -17.459  35.511 -70.681  1.00137.82           C  
ATOM   2139  O   LEU   325     -16.556  35.965 -69.977  1.00137.82           O  
ATOM   2140  CB  LEU   325     -17.873  37.192 -72.416  1.00137.82           C  
ATOM   2141  CG  LEU   325     -17.562  36.262 -73.605  1.00137.82           C  
ATOM   2142  CD1 LEU   325     -18.858  35.672 -74.187  1.00137.82           C  
ATOM   2143  CD2 LEU   325     -16.690  36.950 -74.665  1.00137.82           C  
ATOM   2144  N   HIS   326     -17.558  34.194 -70.968  1.00 90.26           N  
ATOM   2145  CA  HIS   326     -16.633  33.277 -70.358  1.00 90.26           C  
ATOM   2146  C   HIS   326     -15.590  32.817 -71.339  1.00 90.26           C  
ATOM   2147  O   HIS   326     -15.881  32.013 -72.224  1.00 90.26           O  
ATOM   2148  CB  HIS   326     -17.325  32.022 -69.794  1.00 90.26           C  
ATOM   2149  CG  HIS   326     -18.290  32.337 -68.689  1.00 90.26           C  
ATOM   2150  CD2 HIS   326     -19.605  32.690 -68.750  1.00 90.26           C  
ATOM   2151  ND1 HIS   326     -17.966  32.331 -67.350  1.00 90.26           N  
ATOM   2152  CE1 HIS   326     -19.091  32.677 -66.674  1.00 90.26           C  
ATOM   2153  NE2 HIS   326     -20.111  32.906 -67.481  1.00 90.26           N  
ATOM   2154  N   PRO   327     -14.408  33.391 -71.286  1.00199.37           N  
ATOM   2155  CA  PRO   327     -13.322  32.823 -72.054  1.00199.37           C  
ATOM   2156  C   PRO   327     -12.592  31.848 -71.176  1.00199.37           C  
ATOM   2157  O   PRO   327     -11.792  32.309 -70.360  1.00199.37           O  
ATOM   2158  CB  PRO   327     -12.427  33.981 -72.489  1.00199.37           C  
ATOM   2159  CG  PRO   327     -13.355  35.201 -72.433  1.00199.37           C  
ATOM   2160  CD  PRO   327     -14.363  34.844 -71.333  1.00199.37           C  
ATOM   2161  N   ASN   328     -12.721  30.523 -71.385  1.00156.15           N  
ATOM   2162  CA  ASN   328     -12.113  29.683 -70.391  1.00156.15           C  
ATOM   2163  C   ASN   328     -11.638  28.368 -70.933  1.00156.15           C  
ATOM   2164  O   ASN   328     -11.362  27.458 -70.151  1.00156.15           O  
ATOM   2165  CB  ASN   328     -13.099  29.390 -69.242  1.00156.15           C  
ATOM   2166  CG  ASN   328     -14.341  28.711 -69.818  1.00156.15           C  
ATOM   2167  ND2 ASN   328     -15.398  28.565 -68.975  1.00156.15           N  
ATOM   2168  OD1 ASN   328     -14.380  28.338 -70.989  1.00156.15           O  
ATOM   2169  N   GLY   329     -11.496  28.207 -72.260  1.00 45.19           N  
ATOM   2170  CA  GLY   329     -10.939  26.968 -72.727  1.00 45.19           C  
ATOM   2171  C   GLY   329     -11.980  25.896 -72.874  1.00 45.19           C  
ATOM   2172  O   GLY   329     -11.632  24.729 -73.059  1.00 45.19           O  
ATOM   2173  N   GLY   330     -13.279  26.249 -72.805  1.00 38.55           N  
ATOM   2174  CA  GLY   330     -14.288  25.260 -73.077  1.00 38.55           C  
ATOM   2175  C   GLY   330     -14.935  24.689 -71.847  1.00 38.55           C  
ATOM   2176  O   GLY   330     -15.702  23.733 -71.965  1.00 38.55           O  
ATOM   2177  N   ALA   331     -14.656  25.213 -70.637  1.00 46.45           N  
ATOM   2178  CA  ALA   331     -15.328  24.687 -69.476  1.00 46.45           C  
ATOM   2179  C   ALA   331     -16.760  25.115 -69.547  1.00 46.45           C  
ATOM   2180  O   ALA   331     -17.050  26.282 -69.816  1.00 46.45           O  
ATOM   2181  CB  ALA   331     -14.752  25.207 -68.148  1.00 46.45           C  
ATOM   2182  N   VAL   332     -17.700  24.182 -69.276  1.00125.56           N  
ATOM   2183  CA  VAL   332     -19.079  24.554 -69.388  1.00125.56           C  
ATOM   2184  C   VAL   332     -19.595  24.922 -68.034  1.00125.56           C  
ATOM   2185  O   VAL   332     -19.709  24.110 -67.120  1.00125.56           O  
ATOM   2186  CB  VAL   332     -19.960  23.493 -69.993  1.00125.56           C  
ATOM   2187  CG1 VAL   332     -19.943  22.239 -69.104  1.00125.56           C  
ATOM   2188  CG2 VAL   332     -21.359  24.094 -70.212  1.00125.56           C  
ATOM   2189  N   VAL   333     -19.827  26.230 -67.876  1.00101.93           N  
ATOM   2190  CA  VAL   333     -20.380  26.881 -66.735  1.00101.93           C  
ATOM   2191  C   VAL   333     -21.848  26.786 -66.804  1.00101.93           C  
ATOM   2192  O   VAL   333     -22.536  27.170 -65.861  1.00101.93           O  
ATOM   2193  CB  VAL   333     -19.960  28.314 -66.614  1.00101.93           C  
ATOM   2194  CG1 VAL   333     -18.435  28.325 -66.401  1.00101.93           C  
ATOM   2195  CG2 VAL   333     -20.416  29.093 -67.859  1.00101.93           C  
ATOM   2196  N   ASN   334     -22.343  26.368 -67.983  1.00 68.83           N  
ATOM   2197  CA  ASN   334     -23.741  26.258 -68.255  1.00 68.83           C  
ATOM   2198  C   ASN   334     -24.309  27.628 -68.154  1.00 68.83           C  
ATOM   2199  O   ASN   334     -25.464  27.811 -67.776  1.00 68.83           O  
ATOM   2200  CB  ASN   334     -24.486  25.336 -67.278  1.00 68.83           C  
ATOM   2201  CG  ASN   334     -25.859  25.076 -67.876  1.00 68.83           C  
ATOM   2202  ND2 ASN   334     -26.928  25.507 -67.156  1.00 68.83           N  
ATOM   2203  OD1 ASN   334     -25.977  24.506 -68.961  1.00 68.83           O  
ATOM   2204  N   ALA   335     -23.494  28.630 -68.538  1.00 25.84           N  
ATOM   2205  CA  ALA   335     -23.921  29.993 -68.470  1.00 25.84           C  
ATOM   2206  C   ALA   335     -24.410  30.229 -67.048  1.00 25.84           C  
ATOM   2207  O   ALA   335     -25.633  30.467 -66.877  1.00 25.84           O  
ATOM   2208  CB  ALA   335     -25.071  30.320 -69.436  1.00 25.84           C  
ATOM   2209  OXT ALA   335     -23.568  30.158 -66.112  1.00 25.84           O1-
END
