# Supplementary material for: Uses of Phage Display in Agriculture: Sequence Analysis and Comparative Modeling of Late Embryogenesis Abundant Client Proteins Suggest Protein-Nucleic Acid Binding Functionality
Source: Comput Math Methods Med. 2013 Jul 9;2013:470390. doi: 10.1155/2013/470390 (PMC3727180; doi:10.1155/2013/470390)
Supplement: Supplementary file 1 — LEA client protein homology models. The seven PDB coordinate files are labeled by the TAIR locus identifier of the full-length protein from which the binding region originates. [file 470390.f1.zip › 470390.f1/at1g75830.1.pdb]

ATOM      1  N   GLN    30      -0.639  -2.636   2.477  1.00241.46           N  
ATOM      2  CA  GLN    30      -0.730  -1.214   2.472  1.00241.46           C  
ATOM      3  C   GLN    30       0.646  -0.698   2.259  1.00241.46           C  
ATOM      4  O   GLN    30       1.467  -0.662   3.172  1.00241.46           O  
ATOM      5  CB  GLN    30      -1.237  -0.586   3.781  1.00241.46           C  
ATOM      6  CG  GLN    30      -1.276   0.941   3.674  1.00241.46           C  
ATOM      7  CD  GLN    30      -1.703   1.531   5.005  1.00241.46           C  
ATOM      8  NE2 GLN    30      -1.047   2.650   5.411  1.00241.46           N  
ATOM      9  OE1 GLN    30      -2.595   1.008   5.671  1.00241.46           O  
ATOM     10  N   LYS    31       0.937  -0.291   1.015  1.00315.81           N  
ATOM     11  CA  LYS    31       2.226   0.260   0.765  1.00315.81           C  
ATOM     12  C   LYS    31       1.923   1.681   0.487  1.00315.81           C  
ATOM     13  O   LYS    31       0.911   1.984  -0.141  1.00315.81           O  
ATOM     14  CB  LYS    31       2.903  -0.280  -0.509  1.00315.81           C  
ATOM     15  CG  LYS    31       4.438  -0.231  -0.508  1.00315.81           C  
ATOM     16  CD  LYS    31       5.089   1.133  -0.268  1.00315.81           C  
ATOM     17  CE  LYS    31       6.593   1.014  -0.003  1.00315.81           C  
ATOM     18  NZ  LYS    31       6.835   0.017   1.068  1.00315.81           N1+
ATOM     19  N   LEU    32       2.768   2.602   0.969  1.00 90.34           N  
ATOM     20  CA  LEU    32       2.477   3.957   0.644  1.00 90.34           C  
ATOM     21  C   LEU    32       3.196   4.178  -0.642  1.00 90.34           C  
ATOM     22  O   LEU    32       4.416   4.032  -0.707  1.00 90.34           O  
ATOM     23  CB  LEU    32       3.007   4.944   1.695  1.00 90.34           C  
ATOM     24  CG  LEU    32       2.475   4.616   3.105  1.00 90.34           C  
ATOM     25  CD1 LEU    32       2.885   5.680   4.135  1.00 90.34           C  
ATOM     26  CD2 LEU    32       0.964   4.346   3.080  1.00 90.34           C  
ATOM     27  N   CYS    33       2.447   4.495  -1.717  1.00 50.30           N  
ATOM     28  CA  CYS    33       3.099   4.668  -2.978  1.00 50.30           C  
ATOM     29  C   CYS    33       3.365   6.125  -3.115  1.00 50.30           C  
ATOM     30  O   CYS    33       2.456   6.951  -3.031  1.00 50.30           O  
ATOM     31  CB  CYS    33       2.268   4.214  -4.191  1.00 50.30           C  
ATOM     32  SG  CYS    33       1.651   2.516  -4.007  1.00 50.30           S  
ATOM     33  N   GLU    34       4.646   6.468  -3.328  1.00102.66           N  
ATOM     34  CA  GLU    34       5.021   7.843  -3.382  1.00102.66           C  
ATOM     35  C   GLU    34       4.896   8.302  -4.793  1.00102.66           C  
ATOM     36  O   GLU    34       5.884   8.365  -5.523  1.00102.66           O  
ATOM     37  CB  GLU    34       6.488   8.060  -2.989  1.00102.66           C  
ATOM     38  CG  GLU    34       6.812   7.548  -1.588  1.00102.66           C  
ATOM     39  CD  GLU    34       7.007   6.041  -1.684  1.00102.66           C  
ATOM     40  OE1 GLU    34       7.150   5.549  -2.836  1.00102.66           O  
ATOM     41  OE2 GLU    34       7.020   5.362  -0.622  1.00102.66           O1-
ATOM     42  N   ARG    35       3.676   8.665  -5.217  1.00141.77           N  
ATOM     43  CA  ARG    35       3.528   9.115  -6.565  1.00141.77           C  
ATOM     44  C   ARG    35       3.680  10.599  -6.544  1.00141.77           C  
ATOM     45  O   ARG    35       3.451  11.234  -5.516  1.00141.77           O  
ATOM     46  CB  ARG    35       2.152   8.810  -7.171  1.00141.77           C  
ATOM     47  CG  ARG    35       2.140   8.898  -8.694  1.00141.77           C  
ATOM     48  CD  ARG    35       0.736   8.882  -9.295  1.00141.77           C  
ATOM     49  NE  ARG    35       0.309  10.304  -9.403  1.00141.77           N  
ATOM     50  CZ  ARG    35       0.788  11.069 -10.429  1.00141.77           C  
ATOM     51  NH1 ARG    35       1.666  10.533 -11.328  1.00141.77           N1+
ATOM     52  NH2 ARG    35       0.406  12.374 -10.539  1.00141.77           N  
ATOM     53  N   PRO    36       4.073  11.184  -7.642  1.00177.75           N  
ATOM     54  CA  PRO    36       4.118  12.614  -7.685  1.00177.75           C  
ATOM     55  C   PRO    36       2.665  12.955  -7.556  1.00177.75           C  
ATOM     56  O   PRO    36       1.858  12.187  -8.077  1.00177.75           O  
ATOM     57  CB  PRO    36       4.810  12.954  -9.001  1.00177.75           C  
ATOM     58  CG  PRO    36       5.733  11.739  -9.241  1.00177.75           C  
ATOM     59  CD  PRO    36       5.005  10.564  -8.569  1.00177.75           C  
ATOM     60  N   SER    37       2.298  14.073  -6.895  1.00 57.40           N  
ATOM     61  CA  SER    37       0.911  14.317  -6.575  1.00 57.40           C  
ATOM     62  C   SER    37       0.053  14.214  -7.791  1.00 57.40           C  
ATOM     63  O   SER    37       0.443  14.590  -8.895  1.00 57.40           O  
ATOM     64  CB  SER    37       0.644  15.674  -5.894  1.00 57.40           C  
ATOM     65  OG  SER    37       1.250  15.709  -4.607  1.00 57.40           O  
ATOM     66  N   GLY    38      -1.163  13.668  -7.601  1.00 36.16           N  
ATOM     67  CA  GLY    38      -2.009  13.441  -8.727  1.00 36.16           C  
ATOM     68  C   GLY    38      -2.253  14.762  -9.375  1.00 36.16           C  
ATOM     69  O   GLY    38      -2.211  14.874 -10.599  1.00 36.16           O  
ATOM     70  N   THR    39      -2.587  15.788  -8.566  1.00 65.02           N  
ATOM     71  CA  THR    39      -2.776  17.099  -9.116  1.00 65.02           C  
ATOM     72  C   THR    39      -1.464  17.739  -9.456  1.00 65.02           C  
ATOM     73  O   THR    39      -1.226  18.145 -10.592  1.00 65.02           O  
ATOM     74  CB  THR    39      -3.483  18.037  -8.181  1.00 65.02           C  
ATOM     75  CG2 THR    39      -4.865  17.458  -7.835  1.00 65.02           C  
ATOM     76  OG1 THR    39      -2.711  18.223  -7.007  1.00 65.02           O  
ATOM     77  N   TRP    40      -0.536  17.787  -8.481  1.00 91.62           N  
ATOM     78  CA  TRP    40       0.666  18.525  -8.722  1.00 91.62           C  
ATOM     79  C   TRP    40       1.719  17.564  -9.140  1.00 91.62           C  
ATOM     80  O   TRP    40       2.572  17.167  -8.348  1.00 91.62           O  
ATOM     81  CB  TRP    40       1.163  19.248  -7.462  1.00 91.62           C  
ATOM     82  CG  TRP    40       2.320  20.186  -7.679  1.00 91.62           C  
ATOM     83  CD1 TRP    40       3.003  20.502  -8.817  1.00 91.62           C  
ATOM     84  CD2 TRP    40       2.897  20.971  -6.625  1.00 91.62           C  
ATOM     85  CE2 TRP    40       3.913  21.739  -7.191  1.00 91.62           C  
ATOM     86  CE3 TRP    40       2.595  21.047  -5.297  1.00 91.62           C  
ATOM     87  NE1 TRP    40       3.968  21.442  -8.539  1.00 91.62           N  
ATOM     88  CZ2 TRP    40       4.647  22.603  -6.430  1.00 91.62           C  
ATOM     89  CZ3 TRP    40       3.342  21.910  -4.529  1.00 91.62           C  
ATOM     90  CH2 TRP    40       4.348  22.671  -5.087  1.00 91.62           C  
ATOM     91  N   SER    41       1.698  17.202 -10.435  1.00 63.55           N  
ATOM     92  CA  SER    41       2.681  16.307 -10.950  1.00 63.55           C  
ATOM     93  C   SER    41       3.745  17.204 -11.491  1.00 63.55           C  
ATOM     94  O   SER    41       3.676  17.618 -12.647  1.00 63.55           O  
ATOM     95  CB  SER    41       2.157  15.478 -12.136  1.00 63.55           C  
ATOM     96  OG  SER    41       1.017  14.725 -11.743  1.00 63.55           O  
ATOM     97  N   GLY    42       4.771  17.529 -10.674  1.00 37.68           N  
ATOM     98  CA  GLY    42       5.774  18.438 -11.168  1.00 37.68           C  
ATOM     99  C   GLY    42       6.681  18.874 -10.051  1.00 37.68           C  
ATOM    100  O   GLY    42       6.601  18.366  -8.933  1.00 37.68           O  
ATOM    101  N   VAL    43       7.575  19.854 -10.347  1.00113.47           N  
ATOM    102  CA  VAL    43       8.555  20.345  -9.410  1.00113.47           C  
ATOM    103  C   VAL    43       7.861  21.153  -8.353  1.00113.47           C  
ATOM    104  O   VAL    43       7.050  22.026  -8.652  1.00113.47           O  
ATOM    105  CB  VAL    43       9.619  21.205 -10.039  1.00113.47           C  
ATOM    106  CG1 VAL    43       8.972  22.507 -10.540  1.00113.47           C  
ATOM    107  CG2 VAL    43      10.753  21.418  -9.022  1.00113.47           C  
ATOM    108  N   CYS    44       8.098  20.780  -7.077  1.00 93.66           N  
ATOM    109  CA  CYS    44       7.532  21.391  -5.901  1.00 93.66           C  
ATOM    110  C   CYS    44       8.073  22.739  -5.509  1.00 93.66           C  
ATOM    111  O   CYS    44       7.367  23.745  -5.557  1.00 93.66           O  
ATOM    112  CB  CYS    44       7.677  20.442  -4.700  1.00 93.66           C  
ATOM    113  SG  CYS    44       9.279  19.581  -4.744  1.00 93.66           S  
ATOM    114  N   GLY    45       9.360  22.797  -5.109  1.00 45.00           N  
ATOM    115  CA  GLY    45       9.940  24.036  -4.673  1.00 45.00           C  
ATOM    116  C   GLY    45       9.582  24.293  -3.226  1.00 45.00           C  
ATOM    117  O   GLY    45      10.237  25.105  -2.571  1.00 45.00           O  
ATOM    118  N   ASN    46       8.525  23.637  -2.681  1.00 68.36           N  
ATOM    119  CA  ASN    46       8.214  23.866  -1.287  1.00 68.36           C  
ATOM    120  C   ASN    46       7.427  22.709  -0.738  1.00 68.36           C  
ATOM    121  O   ASN    46       6.407  22.308  -1.299  1.00 68.36           O  
ATOM    122  CB  ASN    46       7.413  25.155  -1.027  1.00 68.36           C  
ATOM    123  CG  ASN    46       7.482  25.462   0.467  1.00 68.36           C  
ATOM    124  ND2 ASN    46       8.126  26.605   0.826  1.00 68.36           N  
ATOM    125  OD1 ASN    46       6.984  24.701   1.293  1.00 68.36           O  
ATOM    126  N   SER    47       7.880  22.160   0.410  1.00 87.90           N  
ATOM    127  CA  SER    47       7.259  21.015   1.021  1.00 87.90           C  
ATOM    128  C   SER    47       5.906  21.329   1.577  1.00 87.90           C  
ATOM    129  O   SER    47       4.971  20.547   1.411  1.00 87.90           O  
ATOM    130  CB  SER    47       8.049  20.424   2.201  1.00 87.90           C  
ATOM    131  OG  SER    47       9.217  19.766   1.737  1.00 87.90           O  
ATOM    132  N   ASN    48       5.766  22.482   2.255  1.00 47.10           N  
ATOM    133  CA  ASN    48       4.554  22.781   2.962  1.00 47.10           C  
ATOM    134  C   ASN    48       3.410  22.831   1.995  1.00 47.10           C  
ATOM    135  O   ASN    48       2.363  22.227   2.224  1.00 47.10           O  
ATOM    136  CB  ASN    48       4.640  24.135   3.691  1.00 47.10           C  
ATOM    137  CG  ASN    48       3.602  24.185   4.805  1.00 47.10           C  
ATOM    138  ND2 ASN    48       3.914  24.961   5.876  1.00 47.10           N  
ATOM    139  OD1 ASN    48       2.550  23.552   4.733  1.00 47.10           O  
ATOM    140  N   ALA    49       3.582  23.551   0.873  1.00 37.31           N  
ATOM    141  CA  ALA    49       2.524  23.671  -0.085  1.00 37.31           C  
ATOM    142  C   ALA    49       2.239  22.335  -0.687  1.00 37.31           C  
ATOM    143  O   ALA    49       1.083  21.938  -0.818  1.00 37.31           O  
ATOM    144  CB  ALA    49       2.883  24.616  -1.239  1.00 37.31           C  
ATOM    145  N   CYS    50       3.306  21.592  -1.035  1.00 46.34           N  
ATOM    146  CA  CYS    50       3.161  20.326  -1.695  1.00 46.34           C  
ATOM    147  C   CYS    50       2.337  19.432  -0.835  1.00 46.34           C  
ATOM    148  O   CYS    50       1.367  18.827  -1.294  1.00 46.34           O  
ATOM    149  CB  CYS    50       4.524  19.642  -1.919  1.00 46.34           C  
ATOM    150  SG  CYS    50       4.390  17.884  -2.368  1.00 46.34           S  
ATOM    151  N   LYS    51       2.689  19.350   0.455  1.00113.06           N  
ATOM    152  CA  LYS    51       1.988  18.491   1.355  1.00113.06           C  
ATOM    153  C   LYS    51       0.560  18.912   1.427  1.00113.06           C  
ATOM    154  O   LYS    51      -0.337  18.108   1.181  1.00113.06           O  
ATOM    155  CB  LYS    51       2.576  18.615   2.763  1.00113.06           C  
ATOM    156  CG  LYS    51       1.915  17.746   3.825  1.00113.06           C  
ATOM    157  CD  LYS    51       2.680  17.786   5.149  1.00113.06           C  
ATOM    158  CE  LYS    51       2.658  19.161   5.835  1.00113.06           C  
ATOM    159  NZ  LYS    51       3.436  20.161   5.063  1.00113.06           N1+
ATOM    160  N   ASN    52       0.325  20.209   1.697  1.00 57.41           N  
ATOM    161  CA  ASN    52      -1.000  20.705   1.931  1.00 57.41           C  
ATOM    162  C   ASN    52      -1.843  20.519   0.710  1.00 57.41           C  
ATOM    163  O   ASN    52      -2.906  19.905   0.767  1.00 57.41           O  
ATOM    164  CB  ASN    52      -0.994  22.206   2.279  1.00 57.41           C  
ATOM    165  CG  ASN    52      -2.344  22.573   2.881  1.00 57.41           C  
ATOM    166  ND2 ASN    52      -2.370  23.657   3.702  1.00 57.41           N  
ATOM    167  OD1 ASN    52      -3.350  21.912   2.632  1.00 57.41           O  
ATOM    168  N   GLN    53      -1.354  20.975  -0.452  1.00132.95           N  
ATOM    169  CA  GLN    53      -2.171  20.945  -1.628  1.00132.95           C  
ATOM    170  C   GLN    53      -2.518  19.521  -1.932  1.00132.95           C  
ATOM    171  O   GLN    53      -3.647  19.230  -2.324  1.00132.95           O  
ATOM    172  CB  GLN    53      -1.483  21.567  -2.858  1.00132.95           C  
ATOM    173  CG  GLN    53      -0.352  20.731  -3.454  1.00132.95           C  
ATOM    174  CD  GLN    53      -0.970  19.954  -4.606  1.00132.95           C  
ATOM    175  NE2 GLN    53      -0.645  18.637  -4.702  1.00132.95           N  
ATOM    176  OE1 GLN    53      -1.736  20.503  -5.397  1.00132.95           O  
ATOM    177  N   CYS    54      -1.559  18.587  -1.752  1.00 65.90           N  
ATOM    178  CA  CYS    54      -1.841  17.208  -2.059  1.00 65.90           C  
ATOM    179  C   CYS    54      -2.971  16.694  -1.218  1.00 65.90           C  
ATOM    180  O   CYS    54      -3.980  16.234  -1.751  1.00 65.90           O  
ATOM    181  CB  CYS    54      -0.666  16.249  -1.781  1.00 65.90           C  
ATOM    182  SG  CYS    54      -1.208  14.513  -1.903  1.00 65.90           S  
ATOM    183  N   ILE    55      -2.851  16.772   0.122  1.00132.70           N  
ATOM    184  CA  ILE    55      -3.859  16.183   0.965  1.00132.70           C  
ATOM    185  C   ILE    55      -5.124  16.978   0.875  1.00132.70           C  
ATOM    186  O   ILE    55      -6.211  16.452   1.105  1.00132.70           O  
ATOM    187  CB  ILE    55      -3.515  16.016   2.432  1.00132.70           C  
ATOM    188  CG1 ILE    55      -3.522  17.324   3.248  1.00132.70           C  
ATOM    189  CG2 ILE    55      -2.158  15.292   2.472  1.00132.70           C  
ATOM    190  CD1 ILE    55      -2.411  18.314   2.936  1.00132.70           C  
ATOM    191  N   ASN    56      -5.037  18.307   0.678  1.00122.71           N  
ATOM    192  CA  ASN    56      -6.309  18.963   0.616  1.00122.71           C  
ATOM    193  C   ASN    56      -7.042  18.599  -0.649  1.00122.71           C  
ATOM    194  O   ASN    56      -8.227  18.272  -0.598  1.00122.71           O  
ATOM    195  CB  ASN    56      -6.293  20.497   0.838  1.00122.71           C  
ATOM    196  CG  ASN    56      -5.592  21.259  -0.276  1.00122.71           C  
ATOM    197  ND2 ASN    56      -4.465  21.937   0.065  1.00122.71           N  
ATOM    198  OD1 ASN    56      -6.063  21.295  -1.411  1.00122.71           O  
ATOM    199  N   LEU    57      -6.383  18.656  -1.827  1.00 93.75           N  
ATOM    200  CA  LEU    57      -7.062  18.314  -3.049  1.00 93.75           C  
ATOM    201  C   LEU    57      -7.349  16.835  -3.074  1.00 93.75           C  
ATOM    202  O   LEU    57      -8.498  16.401  -3.108  1.00 93.75           O  
ATOM    203  CB  LEU    57      -6.164  18.571  -4.272  1.00 93.75           C  
ATOM    204  CG  LEU    57      -5.600  20.003  -4.388  1.00 93.75           C  
ATOM    205  CD1 LEU    57      -4.687  20.113  -5.613  1.00 93.75           C  
ATOM    206  CD2 LEU    57      -6.699  21.074  -4.401  1.00 93.75           C  
ATOM    207  N   GLU    58      -6.273  16.026  -3.002  1.00167.89           N  
ATOM    208  CA  GLU    58      -6.347  14.594  -3.095  1.00167.89           C  
ATOM    209  C   GLU    58      -6.432  14.040  -1.719  1.00167.89           C  
ATOM    210  O   GLU    58      -6.368  14.761  -0.732  1.00167.89           O  
ATOM    211  CB  GLU    58      -5.098  13.921  -3.685  1.00167.89           C  
ATOM    212  CG  GLU    58      -4.693  14.414  -5.067  1.00167.89           C  
ATOM    213  CD  GLU    58      -3.772  15.605  -4.846  1.00167.89           C  
ATOM    214  OE1 GLU    58      -2.701  15.399  -4.221  1.00167.89           O  
ATOM    215  OE2 GLU    58      -4.128  16.732  -5.286  1.00167.89           O1-
ATOM    216  N   LYS    59      -6.644  12.721  -1.651  1.00193.58           N  
ATOM    217  CA  LYS    59      -6.836  11.876  -0.504  1.00193.58           C  
ATOM    218  C   LYS    59      -5.589  11.505   0.275  1.00193.58           C  
ATOM    219  O   LYS    59      -5.694  11.125   1.442  1.00193.58           O  
ATOM    220  CB  LYS    59      -7.525  10.579  -0.941  1.00193.58           C  
ATOM    221  CG  LYS    59      -8.726  10.900  -1.832  1.00193.58           C  
ATOM    222  CD  LYS    59      -9.731  11.829  -1.152  1.00193.58           C  
ATOM    223  CE  LYS    59     -10.554  12.669  -2.125  1.00193.58           C  
ATOM    224  NZ  LYS    59      -9.727  13.780  -2.649  1.00193.58           N1+
ATOM    225  N   ALA    60      -4.390  11.560  -0.340  1.00 82.60           N  
ATOM    226  CA  ALA    60      -3.159  11.027   0.207  1.00 82.60           C  
ATOM    227  C   ALA    60      -2.925  11.412   1.646  1.00 82.60           C  
ATOM    228  O   ALA    60      -3.504  12.368   2.156  1.00 82.60           O  
ATOM    229  CB  ALA    60      -1.922  11.454  -0.598  1.00 82.60           C  
ATOM    230  N   ARG    61      -2.148  10.567   2.373  1.00130.65           N  
ATOM    231  CA  ARG    61      -1.828  10.782   3.765  1.00130.65           C  
ATOM    232  C   ARG    61      -0.885  11.933   4.003  1.00130.65           C  
ATOM    233  O   ARG    61      -1.229  12.896   4.687  1.00130.65           O  
ATOM    234  CB  ARG    61      -1.160   9.567   4.436  1.00130.65           C  
ATOM    235  CG  ARG    61      -2.049   8.332   4.603  1.00130.65           C  
ATOM    236  CD  ARG    61      -3.312   8.564   5.435  1.00130.65           C  
ATOM    237  NE  ARG    61      -4.461   8.097   4.608  1.00130.65           N  
ATOM    238  CZ  ARG    61      -5.152   8.960   3.807  1.00130.65           C  
ATOM    239  NH1 ARG    61      -4.869  10.295   3.836  1.00130.65           N1+
ATOM    240  NH2 ARG    61      -6.117   8.485   2.969  1.00130.65           N  
ATOM    241  N   HIS    62       0.330  11.876   3.411  1.00 73.24           N  
ATOM    242  CA  HIS    62       1.336  12.881   3.623  1.00 73.24           C  
ATOM    243  C   HIS    62       1.960  13.195   2.300  1.00 73.24           C  
ATOM    244  O   HIS    62       1.837  12.423   1.350  1.00 73.24           O  
ATOM    245  CB  HIS    62       2.446  12.456   4.606  1.00 73.24           C  
ATOM    246  CG  HIS    62       3.016  11.081   4.376  1.00 73.24           C  
ATOM    247  CD2 HIS    62       4.225  10.697   3.887  1.00 73.24           C  
ATOM    248  ND1 HIS    62       2.356   9.918   4.699  1.00 73.24           N  
ATOM    249  CE1 HIS    62       3.191   8.893   4.395  1.00 73.24           C  
ATOM    250  NE2 HIS    62       4.340   9.316   3.899  1.00 73.24           N  
ATOM    251  N   GLY    63       2.626  14.368   2.212  1.00 28.23           N  
ATOM    252  CA  GLY    63       3.268  14.778   0.995  1.00 28.23           C  
ATOM    253  C   GLY    63       4.466  15.597   1.375  1.00 28.23           C  
ATOM    254  O   GLY    63       4.555  16.084   2.500  1.00 28.23           O  
ATOM    255  N   SER    64       5.434  15.754   0.443  1.00 48.38           N  
ATOM    256  CA  SER    64       6.611  16.529   0.729  1.00 48.38           C  
ATOM    257  C   SER    64       7.321  16.774  -0.569  1.00 48.38           C  
ATOM    258  O   SER    64       7.139  16.039  -1.538  1.00 48.38           O  
ATOM    259  CB  SER    64       7.628  15.810   1.634  1.00 48.38           C  
ATOM    260  OG  SER    64       7.046  15.485   2.889  1.00 48.38           O  
ATOM    261  N   CYS    65       8.174  17.820  -0.599  1.00 60.38           N  
ATOM    262  CA  CYS    65       8.930  18.192  -1.763  1.00 60.38           C  
ATOM    263  C   CYS    65      10.170  17.346  -1.769  1.00 60.38           C  
ATOM    264  O   CYS    65      11.269  17.825  -1.501  1.00 60.38           O  
ATOM    265  CB  CYS    65       9.338  19.682  -1.716  1.00 60.38           C  
ATOM    266  SG  CYS    65      10.304  20.269  -3.137  1.00 60.38           S  
ATOM    267  N   ASN    66      10.013  16.061  -2.140  1.00 74.75           N  
ATOM    268  CA  ASN    66      11.070  15.092  -2.123  1.00 74.75           C  
ATOM    269  C   ASN    66      12.065  15.452  -3.175  1.00 74.75           C  
ATOM    270  O   ASN    66      11.768  16.187  -4.115  1.00 74.75           O  
ATOM    271  CB  ASN    66      10.551  13.665  -2.408  1.00 74.75           C  
ATOM    272  CG  ASN    66      11.696  12.669  -2.312  1.00 74.75           C  
ATOM    273  ND2 ASN    66      11.758  11.721  -3.286  1.00 74.75           N  
ATOM    274  OD1 ASN    66      12.515  12.733  -1.396  1.00 74.75           O  
ATOM    275  N   TYR    67      13.291  14.918  -3.037  1.00145.27           N  
ATOM    276  CA  TYR    67      14.332  15.202  -3.970  1.00145.27           C  
ATOM    277  C   TYR    67      14.479  13.904  -4.702  1.00145.27           C  
ATOM    278  O   TYR    67      13.521  13.140  -4.753  1.00145.27           O  
ATOM    279  CB  TYR    67      15.649  15.682  -3.294  1.00145.27           C  
ATOM    280  CG  TYR    67      16.652  16.044  -4.344  1.00145.27           C  
ATOM    281  CD1 TYR    67      16.491  17.136  -5.169  1.00145.27           C  
ATOM    282  CD2 TYR    67      17.769  15.257  -4.493  1.00145.27           C  
ATOM    283  CE1 TYR    67      17.428  17.428  -6.137  1.00145.27           C  
ATOM    284  CE2 TYR    67      18.707  15.542  -5.455  1.00145.27           C  
ATOM    285  CZ  TYR    67      18.535  16.625  -6.278  1.00145.27           C  
ATOM    286  OH  TYR    67      19.502  16.909  -7.267  1.00145.27           O  
ATOM    287  N   VAL    68      15.601  13.704  -5.404  1.00156.68           N  
ATOM    288  CA  VAL    68      15.993  12.581  -6.186  1.00156.68           C  
ATOM    289  C   VAL    68      16.348  13.284  -7.442  1.00156.68           C  
ATOM    290  O   VAL    68      15.907  14.410  -7.657  1.00156.68           O  
ATOM    291  CB  VAL    68      14.919  11.568  -6.479  1.00156.68           C  
ATOM    292  CG1 VAL    68      14.003  12.114  -7.584  1.00156.68           C  
ATOM    293  CG2 VAL    68      15.585  10.224  -6.796  1.00156.68           C  
ATOM    294  N   PHE    69      17.154  12.676  -8.307  1.00 91.81           N  
ATOM    295  CA  PHE    69      17.527  13.374  -9.496  1.00 91.81           C  
ATOM    296  C   PHE    69      16.268  13.504 -10.301  1.00 91.81           C  
ATOM    297  O   PHE    69      15.335  12.729 -10.090  1.00 91.81           O  
ATOM    298  CB  PHE    69      18.587  12.548 -10.257  1.00 91.81           C  
ATOM    299  CG  PHE    69      19.213  13.284 -11.390  1.00 91.81           C  
ATOM    300  CD1 PHE    69      20.267  14.139 -11.167  1.00 91.81           C  
ATOM    301  CD2 PHE    69      18.756  13.108 -12.677  1.00 91.81           C  
ATOM    302  CE1 PHE    69      20.846  14.809 -12.217  1.00 91.81           C  
ATOM    303  CE2 PHE    69      19.335  13.776 -13.730  1.00 91.81           C  
ATOM    304  CZ  PHE    69      20.384  14.630 -13.499  1.00 91.81           C  
ATOM    305  N   PRO    70      16.149  14.483 -11.167  1.00102.91           N  
ATOM    306  CA  PRO    70      17.082  15.568 -11.301  1.00102.91           C  
ATOM    307  C   PRO    70      16.855  16.628 -10.274  1.00102.91           C  
ATOM    308  O   PRO    70      17.815  17.258  -9.829  1.00102.91           O  
ATOM    309  CB  PRO    70      16.900  16.115 -12.720  1.00102.91           C  
ATOM    310  CG  PRO    70      15.491  15.649 -13.122  1.00102.91           C  
ATOM    311  CD  PRO    70      15.313  14.335 -12.346  1.00102.91           C  
ATOM    312  N   ALA    71      15.585  16.829  -9.880  1.00 77.26           N  
ATOM    313  CA  ALA    71      15.249  17.924  -9.024  1.00 77.26           C  
ATOM    314  C   ALA    71      14.084  17.498  -8.203  1.00 77.26           C  
ATOM    315  O   ALA    71      13.543  16.408  -8.382  1.00 77.26           O  
ATOM    316  CB  ALA    71      14.832  19.198  -9.782  1.00 77.26           C  
ATOM    317  N   HIS    72      13.688  18.358  -7.251  1.00 70.28           N  
ATOM    318  CA  HIS    72      12.602  18.052  -6.371  1.00 70.28           C  
ATOM    319  C   HIS    72      11.314  17.988  -7.132  1.00 70.28           C  
ATOM    320  O   HIS    72      11.106  18.726  -8.096  1.00 70.28           O  
ATOM    321  CB  HIS    72      12.343  19.104  -5.280  1.00 70.28           C  
ATOM    322  CG  HIS    72      13.457  19.260  -4.298  1.00 70.28           C  
ATOM    323  CD2 HIS    72      14.354  20.275  -4.140  1.00 70.28           C  
ATOM    324  ND1 HIS    72      13.755  18.342  -3.323  1.00 70.28           N  
ATOM    325  CE1 HIS    72      14.807  18.834  -2.622  1.00 70.28           C  
ATOM    326  NE2 HIS    72      15.204  20.008  -3.086  1.00 70.28           N  
ATOM    327  N   LYS    73      10.429  17.059  -6.694  1.00149.52           N  
ATOM    328  CA  LYS    73       9.084  16.938  -7.199  1.00149.52           C  
ATOM    329  C   LYS    73       8.177  16.861  -6.011  1.00149.52           C  
ATOM    330  O   LYS    73       8.587  16.469  -4.920  1.00149.52           O  
ATOM    331  CB  LYS    73       8.718  15.638  -7.934  1.00149.52           C  
ATOM    332  CG  LYS    73       9.459  15.357  -9.222  1.00149.52           C  
ATOM    333  CD  LYS    73      10.865  14.844  -8.966  1.00149.52           C  
ATOM    334  CE  LYS    73      11.571  14.406 -10.241  1.00149.52           C  
ATOM    335  NZ  LYS    73      12.949  14.010  -9.917  1.00149.52           N1+
ATOM    336  N   CYS    74       6.891  17.210  -6.213  1.00 71.85           N  
ATOM    337  CA  CYS    74       5.941  17.159  -5.138  1.00 71.85           C  
ATOM    338  C   CYS    74       5.454  15.749  -5.023  1.00 71.85           C  
ATOM    339  O   CYS    74       4.456  15.358  -5.627  1.00 71.85           O  
ATOM    340  CB  CYS    74       4.730  18.091  -5.368  1.00 71.85           C  
ATOM    341  SG  CYS    74       3.409  17.887  -4.139  1.00 71.85           S  
ATOM    342  N   ILE    75       6.153  14.944  -4.203  1.00 85.42           N  
ATOM    343  CA  ILE    75       5.789  13.567  -4.046  1.00 85.42           C  
ATOM    344  C   ILE    75       4.806  13.450  -2.918  1.00 85.42           C  
ATOM    345  O   ILE    75       4.920  14.122  -1.891  1.00 85.42           O  
ATOM    346  CB  ILE    75       6.985  12.695  -3.825  1.00 85.42           C  
ATOM    347  CG1 ILE    75       7.869  12.755  -5.083  1.00 85.42           C  
ATOM    348  CG2 ILE    75       6.508  11.278  -3.471  1.00 85.42           C  
ATOM    349  CD1 ILE    75       9.270  12.187  -4.891  1.00 85.42           C  
ATOM    350  N   CYS    76       3.758  12.619  -3.126  1.00 74.73           N  
ATOM    351  CA  CYS    76       2.750  12.448  -2.116  1.00 74.73           C  
ATOM    352  C   CYS    76       2.542  10.970  -1.924  1.00 74.73           C  
ATOM    353  O   CYS    76       2.730  10.173  -2.842  1.00 74.73           O  
ATOM    354  CB  CYS    76       1.431  13.154  -2.493  1.00 74.73           C  
ATOM    355  SG  CYS    76       0.315  13.436  -1.090  1.00 74.73           S  
ATOM    356  N   TYR    77       2.126  10.568  -0.705  1.00 81.32           N  
ATOM    357  CA  TYR    77       2.075   9.177  -0.345  1.00 81.32           C  
ATOM    358  C   TYR    77       0.645   8.756  -0.265  1.00 81.32           C  
ATOM    359  O   TYR    77      -0.092   9.211   0.608  1.00 81.32           O  
ATOM    360  CB  TYR    77       2.691   8.948   1.047  1.00 81.32           C  
ATOM    361  CG  TYR    77       4.110   9.406   0.991  1.00 81.32           C  
ATOM    362  CD1 TYR    77       4.425  10.748   0.909  1.00 81.32           C  
ATOM    363  CD2 TYR    77       5.131   8.490   1.054  1.00 81.32           C  
ATOM    364  CE1 TYR    77       5.733  11.165   0.861  1.00 81.32           C  
ATOM    365  CE2 TYR    77       6.441   8.901   1.006  1.00 81.32           C  
ATOM    366  CZ  TYR    77       6.746  10.237   0.907  1.00 81.32           C  
ATOM    367  OH  TYR    77       8.094  10.653   0.855  1.00 81.32           O  
ATOM    368  N   PHE    78       0.225   7.838  -1.162  1.00 80.80           N  
ATOM    369  CA  PHE    78      -1.145   7.417  -1.177  1.00 80.80           C  
ATOM    370  C   PHE    78      -1.181   6.011  -0.664  1.00 80.80           C  
ATOM    371  O   PHE    78      -0.215   5.258  -0.781  1.00 80.80           O  
ATOM    372  CB  PHE    78      -1.766   7.292  -2.578  1.00 80.80           C  
ATOM    373  CG  PHE    78      -1.473   8.508  -3.379  1.00 80.80           C  
ATOM    374  CD1 PHE    78      -2.029   9.727  -3.077  1.00 80.80           C  
ATOM    375  CD2 PHE    78      -0.646   8.398  -4.472  1.00 80.80           C  
ATOM    376  CE1 PHE    78      -1.741  10.825  -3.851  1.00 80.80           C  
ATOM    377  CE2 PHE    78      -0.355   9.491  -5.249  1.00 80.80           C  
ATOM    378  CZ  PHE    78      -0.904  10.709  -4.937  1.00 80.80           C  
ATOM    379  N   PRO    79      -2.284   5.647  -0.072  1.00157.30           N  
ATOM    380  CA  PRO    79      -2.429   4.287   0.360  1.00157.30           C  
ATOM    381  C   PRO    79      -2.600   3.434  -0.852  1.00157.30           C  
ATOM    382  O   PRO    79      -3.245   3.847  -1.814  1.00157.30           O  
ATOM    383  CB  PRO    79      -3.620   4.274   1.313  1.00157.30           C  
ATOM    384  CG  PRO    79      -3.637   5.700   1.887  1.00157.30           C  
ATOM    385  CD  PRO    79      -3.024   6.567   0.774  1.00157.30           C  
ATOM    386  N   CYS    80      -2.040   2.219  -0.840  1.00 79.28           N  
ATOM    387  CA  CYS    80      -2.169   1.455  -2.038  1.00 79.28           C  
ATOM    388  C   CYS    80      -2.755   0.097  -1.680  1.00 79.28           C  
ATOM    389  O   CYS    80      -2.054  -0.923  -1.911  1.00 79.28           O  
ATOM    390  CB  CYS    80      -0.818   1.245  -2.735  1.00 79.28           C  
ATOM    391  SG  CYS    80      -0.083   2.873  -3.033  1.00 79.28           S  
ATOM    392  OXT CYS    80      -3.914   0.065  -1.184  1.00 79.28           O1-
END
