# Supplementary material for: Uses of Phage Display in Agriculture: Sequence Analysis and Comparative Modeling of Late Embryogenesis Abundant Client Proteins Suggest Protein-Nucleic Acid Binding Functionality
Source: Comput Math Methods Med. 2013 Jul 9;2013:470390. doi: 10.1155/2013/470390 (PMC3727180; doi:10.1155/2013/470390)
Supplement: Supplementary file 1 — LEA client protein homology models. The seven PDB coordinate files are labeled by the TAIR locus identifier of the full-length protein from which the binding region originates. [file 470390.f1.zip › 470390.f1/at3g55170.1.pdb]

EXPDTA    THEORETICAL MODEL, MODELLER 9.11 2013/02/11 04:48:47
REMARK   6 MODELLER OBJECTIVE FUNCTION:      3428.4109
REMARK   6 MODELLER BEST TEMPLATE % SEQ ID:  65.574
ATOM      1  N   MET     1     -11.435 -39.039 148.686  1.00 51.52           N
ATOM      2  CA  MET     1     -12.010 -38.580 149.972  1.00 51.52           C
ATOM      3  CB  MET     1     -11.749 -37.076 150.165  1.00 51.52           C
ATOM      4  CG  MET     1     -10.261 -36.718 150.236  1.00 51.52           C
ATOM      5  SD  MET     1      -9.917 -34.947 150.460  1.00 51.52           S
ATOM      6  CE  MET     1      -8.124 -35.098 150.212  1.00 51.52           C
ATOM      7  C   MET     1     -13.486 -38.803 149.964  1.00 51.52           C
ATOM      8  O   MET     1     -14.262 -37.887 149.693  1.00 51.52           O
ATOM      9  N   ALA     2     -13.916 -40.043 150.265  1.00 63.95           N
ATOM     10  CA  ALA     2     -15.320 -40.299 150.251  1.00 63.95           C
ATOM     11  CB  ALA     2     -15.698 -41.610 149.541  1.00 63.95           C
ATOM     12  C   ALA     2     -15.788 -40.404 151.668  1.00 63.95           C
ATOM     13  O   ALA     2     -15.260 -41.199 152.443  1.00 63.95           O
ATOM     14  N   ARG     3     -16.792 -39.568 152.016  1.00160.30           N
ATOM     15  CA  ARG     3     -17.443 -39.472 153.298  1.00160.30           C
ATOM     16  CB  ARG     3     -16.873 -40.319 154.452  1.00160.30           C
ATOM     17  CG  ARG     3     -17.352 -41.773 154.474  1.00160.30           C
ATOM     18  CD  ARG     3     -18.610 -41.966 155.329  1.00160.30           C
ATOM     19  NE  ARG     3     -18.324 -41.388 156.674  1.00160.30           N
ATOM     20  CZ  ARG     3     -17.833 -42.171 157.678  1.00160.30           C
ATOM     21  NH1 ARG     3     -17.649 -43.509 157.481  1.00160.30           N
ATOM     22  NH2 ARG     3     -17.524 -41.611 158.884  1.00160.30           N
ATOM     23  C   ARG     3     -17.318 -38.055 153.727  1.00160.30           C
ATOM     24  O   ARG     3     -16.766 -37.219 153.017  1.00160.30           O
ATOM     25  N   ILE     4     -17.855 -37.732 154.912  0.67166.26           N
ATOM     26  CA  ILE     4     -17.699 -36.393 155.378  0.67166.26           C
ATOM     27  CB  ILE     4     -18.988 -35.629 155.437  0.67166.26           C
ATOM     28  CG1 ILE     4     -19.666 -35.632 154.054  0.67166.26           C
ATOM     29  CG2 ILE     4     -18.666 -34.212 155.942  0.67166.26           C
ATOM     30  CD1 ILE     4     -21.123 -35.174 154.086  0.00166.26           C
ATOM     31  C   ILE     4     -17.156 -36.519 156.759  0.67166.26           C
ATOM     32  O   ILE     4     -17.370 -37.534 157.422  0.67166.26           O
ATOM     33  N   LYS     5     -16.384 -35.511 157.205  0.67121.26           N
ATOM     34  CA  LYS     5     -15.862 -35.562 158.537  0.67121.26           C
ATOM     35  CB  LYS     5     -14.405 -35.084 158.661  0.67121.26           C
ATOM     36  CG  LYS     5     -13.394 -36.040 158.024  0.67121.26           C
ATOM     37  CD  LYS     5     -13.452 -36.086 156.497  0.67121.26           C
ATOM     38  CE  LYS     5     -12.434 -37.050 155.888  0.50121.26           C
ATOM     39  NZ  LYS     5     -12.778 -38.435 156.276  0.50121.26           N
ATOM     40  C   LYS     5     -16.708 -34.665 159.380  0.67121.26           C
ATOM     41  O   LYS     5     -17.196 -33.638 158.913  0.67121.26           O
ATOM     42  N   VAL     6     -16.891 -35.042 160.662  0.67 48.07           N
ATOM     43  CA  VAL     6     -17.752 -34.325 161.563  0.67 48.07           C
ATOM     44  CB  VAL     6     -17.820 -34.935 162.931  0.67 48.07           C
ATOM     45  CG1 VAL     6     -18.676 -34.021 163.827  1.00 48.07           C
ATOM     46  CG2 VAL     6     -18.352 -36.373 162.802  1.00 48.07           C
ATOM     47  C   VAL     6     -17.246 -32.932 161.735  0.67 48.07           C
ATOM     48  O   VAL     6     -18.023 -31.978 161.761  0.67 48.07           O
ATOM     49  N   HIS     7     -15.918 -32.772 161.848  0.67107.15           N
ATOM     50  CA  HIS     7     -15.374 -31.461 162.041  0.67107.15           C
ATOM     51  ND1 HIS     7     -12.733 -31.898 159.922  1.00107.15           N
ATOM     52  CG  HIS     7     -13.144 -32.328 161.165  0.67107.15           C
ATOM     53  CB  HIS     7     -13.839 -31.468 162.181  0.67107.15           C
ATOM     54  NE2 HIS     7     -12.141 -34.037 160.081  1.00107.15           N
ATOM     55  CD2 HIS     7     -12.775 -33.637 161.244  1.00107.15           C
ATOM     56  CE1 HIS     7     -12.139 -32.958 159.318  1.00107.15           C
ATOM     57  C   HIS     7     -15.755 -30.632 160.854  0.67107.15           C
ATOM     58  O   HIS     7     -16.118 -29.464 160.990  0.67107.15           O
ATOM     59  N   GLU     8     -15.695 -31.230 159.651  0.67 55.88           N
ATOM     60  CA  GLU     8     -16.022 -30.525 158.446  0.67 55.88           C
ATOM     61  CB  GLU     8     -15.833 -31.400 157.194  0.67 55.88           C
ATOM     62  CG  GLU     8     -14.372 -31.770 156.929  0.67 55.88           C
ATOM     63  CD  GLU     8     -14.335 -32.743 155.759  1.00 55.88           C
ATOM     64  OE1 GLU     8     -15.433 -33.118 155.269  1.00 55.88           O
ATOM     65  OE2 GLU     8     -13.209 -33.126 155.340  1.00 55.88           O
ATOM     66  C   GLU     8     -17.462 -30.113 158.493  0.67 55.88           C
ATOM     67  O   GLU     8     -17.796 -28.989 158.120  0.67 55.88           O
ATOM     68  N   LEU     9     -18.364 -31.007 158.954  0.67150.49           N
ATOM     69  CA  LEU     9     -19.752 -30.631 158.990  0.67150.49           C
ATOM     70  CB  LEU     9     -20.747 -31.695 159.505  0.67150.49           C
ATOM     71  CG  LEU     9     -21.031 -32.901 158.588  0.67150.49           C
ATOM     72  CD1 LEU     9     -21.463 -32.460 157.183  0.67150.49           C
ATOM     73  CD2 LEU     9     -19.901 -33.929 158.603  0.67150.49           C
ATOM     74  C   LEU     9     -19.890 -29.499 159.940  0.67150.49           C
ATOM     75  O   LEU     9     -20.601 -28.529 159.681  0.67150.49           O
ATOM     76  N   ARG    10     -19.197 -29.595 161.084  0.67332.82           N
ATOM     77  CA  ARG    10     -19.243 -28.522 162.018  0.67332.82           C
ATOM     78  CB  ARG    10     -18.445 -28.821 163.295  0.67332.82           C
ATOM     79  CG  ARG    10     -18.768 -30.205 163.864  0.67332.82           C
ATOM     80  CD  ARG    10     -20.230 -30.405 164.254  0.67332.82           C
ATOM     81  NE  ARG    10     -20.464 -29.617 165.490  0.67332.82           N
ATOM     82  CZ  ARG    10     -20.137 -30.162 166.697  0.67332.82           C
ATOM     83  NH1 ARG    10     -19.587 -31.410 166.754  0.67332.82           N
ATOM     84  NH2 ARG    10     -20.358 -29.460 167.847  0.67332.82           N
ATOM     85  C   ARG    10     -18.549 -27.432 161.279  0.67332.82           C
ATOM     86  O   ARG    10     -17.866 -27.695 160.295  0.67332.82           O
ATOM     87  N   ASP    11     -18.723 -26.174 161.696  0.67269.80           N
ATOM     88  CA  ASP    11     -18.102 -25.075 161.012  0.67269.80           C
ATOM     89  CB  ASP    11     -16.604 -25.307 160.721  1.00269.80           C
ATOM     90  CG  ASP    11     -15.969 -24.000 160.262  1.00269.80           C
ATOM     91  OD1 ASP    11     -16.624 -22.934 160.410  1.00269.80           O
ATOM     92  OD2 ASP    11     -14.817 -24.057 159.754  1.00269.80           O
ATOM     93  C   ASP    11     -18.803 -24.838 159.707  0.67269.80           C
ATOM     94  O   ASP    11     -18.414 -23.966 158.932  0.67269.80           O
ATOM     95  N   LYS    12     -19.892 -25.581 159.439  0.67113.13           N
ATOM     96  CA  LYS    12     -20.664 -25.272 158.271  0.67113.13           C
ATOM     97  CB  LYS    12     -21.130 -26.495 157.457  0.67113.13           C
ATOM     98  CG  LYS    12     -19.988 -27.204 156.724  0.67113.13           C
ATOM     99  CD  LYS    12     -20.375 -28.562 156.135  0.67113.13           C
ATOM    100  CE  LYS    12     -20.653 -28.525 154.632  0.50113.13           C
ATOM    101  NZ  LYS    12     -20.876 -29.899 154.131  0.50113.13           N
ATOM    102  C   LYS    12     -21.877 -24.585 158.798  0.67113.13           C
ATOM    103  O   LYS    12     -22.284 -24.823 159.933  0.67113.13           O
ATOM    104  N   SER    13     -22.480 -23.691 157.996  0.67 29.09           N
ATOM    105  CA  SER    13     -23.638 -22.993 158.473  0.67 29.09           C
ATOM    106  CB  SER    13     -24.054 -21.806 157.586  0.67 29.09           C
ATOM    107  OG  SER    13     -24.431 -22.271 156.299  1.00 29.09           O
ATOM    108  C   SER    13     -24.773 -23.963 158.506  0.67 29.09           C
ATOM    109  O   SER    13     -24.717 -25.031 157.899  0.67 29.09           O
ATOM    110  N   LYS    14     -25.840 -23.610 159.244  0.67130.76           N
ATOM    111  CA  LYS    14     -26.982 -24.468 159.358  0.67130.76           C
ATOM    112  CB  LYS    14     -28.094 -23.874 160.237  0.67130.76           C
ATOM    113  CG  LYS    14     -27.763 -23.868 161.729  0.67130.76           C
ATOM    114  CD  LYS    14     -27.629 -25.273 162.319  0.67130.76           C
ATOM    115  CE  LYS    14     -28.975 -25.936 162.625  0.50130.76           C
ATOM    116  NZ  LYS    14     -29.746 -26.124 161.374  0.50130.76           N
ATOM    117  C   LYS    14     -27.555 -24.644 157.992  0.67130.76           C
ATOM    118  O   LYS    14     -27.995 -25.733 157.629  0.67130.76           O
ATOM    119  N   SER    15     -27.568 -23.556 157.202  0.67 29.02           N
ATOM    120  CA  SER    15     -28.127 -23.586 155.882  0.67 29.02           C
ATOM    121  CB  SER    15     -28.151 -22.197 155.223  0.67 29.02           C
ATOM    122  OG  SER    15     -26.824 -21.723 155.045  1.00 29.02           O
ATOM    123  C   SER    15     -27.313 -24.481 155.005  0.67 29.02           C
ATOM    124  O   SER    15     -27.862 -25.212 154.184  0.67 29.02           O
ATOM    125  N   ASP    16     -25.976 -24.444 155.160  0.67 27.73           N
ATOM    126  CA  ASP    16     -25.111 -25.224 154.321  0.67 27.73           C
ATOM    127  CB  ASP    16     -23.619 -24.988 154.614  0.67 27.73           C
ATOM    128  CG  ASP    16     -23.266 -23.589 154.134  0.67 27.73           C
ATOM    129  OD1 ASP    16     -24.141 -22.956 153.487  1.00 27.73           O
ATOM    130  OD2 ASP    16     -22.121 -23.138 154.401  1.00 27.73           O
ATOM    131  C   ASP    16     -25.370 -26.678 154.551  0.67 27.73           C
ATOM    132  O   ASP    16     -25.426 -27.462 153.606  0.67 27.73           O
ATOM    133  N   LEU    17     -25.547 -27.074 155.824  0.67 48.88           N
ATOM    134  CA  LEU    17     -25.730 -28.454 156.163  0.67 48.88           C
ATOM    135  CB  LEU    17     -25.855 -28.691 157.680  0.67 48.88           C
ATOM    136  CG  LEU    17     -24.555 -28.451 158.472  0.67 48.88           C
ATOM    137  CD1 LEU    17     -24.767 -28.710 159.976  0.67 48.88           C
ATOM    138  CD2 LEU    17     -23.395 -29.286 157.909  0.67 48.88           C
ATOM    139  C   LEU    17     -26.987 -28.958 155.537  0.67 48.88           C
ATOM    140  O   LEU    17     -27.026 -30.072 155.015  0.67 48.88           O
ATOM    141  N   SER    18     -28.056 -28.145 155.576  0.67 59.72           N
ATOM    142  CA  SER    18     -29.315 -28.565 155.037  0.67 59.72           C
ATOM    143  CB  SER    18     -30.413 -27.505 155.214  0.67 59.72           C
ATOM    144  OG  SER    18     -31.635 -27.974 154.664  1.00 59.72           O
ATOM    145  C   SER    18     -29.152 -28.799 153.570  0.67 59.72           C
ATOM    146  O   SER    18     -29.659 -29.781 153.030  0.67 59.72           O
ATOM    147  N   THR    19     -28.420 -27.899 152.888  0.67 20.47           N
ATOM    148  CA  THR    19     -28.247 -28.016 151.469  0.67 20.47           C
ATOM    149  CB  THR    19     -27.455 -26.884 150.890  0.50 20.47           C
ATOM    150  OG1 THR    19     -28.096 -25.649 151.173  1.00 20.47           O
ATOM    151  CG2 THR    19     -27.353 -27.092 149.370  1.00 20.47           C
ATOM    152  C   THR    19     -27.499 -29.275 151.182  0.67 20.47           C
ATOM    153  O   THR    19     -27.849 -30.031 150.278  0.67 20.47           O
ATOM    154  N   GLN    20     -26.457 -29.545 151.984  0.67 83.29           N
ATOM    155  CA  GLN    20     -25.620 -30.686 151.774  0.67 83.29           C
ATOM    156  CB  GLN    20     -24.477 -30.766 152.801  0.67 83.29           C
ATOM    157  CG  GLN    20     -23.549 -31.963 152.593  0.67 83.29           C
ATOM    158  CD  GLN    20     -22.763 -31.732 151.307  0.67 83.29           C
ATOM    159  OE1 GLN    20     -21.894 -30.863 151.232  0.67 83.29           O
ATOM    160  NE2 GLN    20     -23.083 -32.531 150.255  0.50 83.29           N
ATOM    161  C   GLN    20     -26.461 -31.914 151.925  0.67 83.29           C
ATOM    162  O   GLN    20     -26.273 -32.897 151.209  0.67 83.29           O
ATOM    163  N   LEU    21     -27.418 -31.888 152.871  0.67119.53           N
ATOM    164  CA  LEU    21     -28.204 -33.058 153.125  0.67119.53           C
ATOM    165  CB  LEU    21     -29.211 -32.868 154.281  0.67119.53           C
ATOM    166  CG  LEU    21     -29.779 -34.172 154.896  0.67119.53           C
ATOM    167  CD1 LEU    21     -31.009 -33.882 155.767  0.67119.53           C
ATOM    168  CD2 LEU    21     -30.025 -35.284 153.871  0.67119.53           C
ATOM    169  C   LEU    21     -28.993 -33.366 151.888  0.67119.53           C
ATOM    170  O   LEU    21     -29.034 -34.510 151.440  0.67119.53           O
ATOM    171  N   LYS    22     -29.612 -32.344 151.268  0.67119.73           N
ATOM    172  CA  LYS    22     -30.444 -32.620 150.132  0.67119.73           C
ATOM    173  CB  LYS    22     -31.136 -31.373 149.558  0.50119.73           C
ATOM    174  CG  LYS    22     -32.136 -31.719 148.455  0.00119.73           C
ATOM    175  CD  LYS    22     -33.347 -32.503 148.964  1.00119.73           C
ATOM    176  CE  LYS    22     -34.303 -32.951 147.856  1.00119.73           C
ATOM    177  NZ  LYS    22     -33.728 -34.105 147.128  1.00119.73           N
ATOM    178  C   LYS    22     -29.608 -33.214 149.047  0.67119.73           C
ATOM    179  O   LYS    22     -30.023 -34.157 148.376  0.67119.73           O
ATOM    180  N   GLU    23     -28.389 -32.685 148.858  0.67 30.27           N
ATOM    181  CA  GLU    23     -27.539 -33.144 147.802  0.67 30.27           C
ATOM    182  CB  GLU    23     -26.220 -32.358 147.754  0.67 30.27           C
ATOM    183  CG  GLU    23     -26.448 -30.871 147.475  0.67 30.27           C
ATOM    184  CD  GLU    23     -25.105 -30.161 147.465  1.00 30.27           C
ATOM    185  OE1 GLU    23     -24.058 -30.862 147.496  1.00 30.27           O
ATOM    186  OE2 GLU    23     -25.111 -28.902 147.427  1.00 30.27           O
ATOM    187  C   GLU    23     -27.229 -34.588 148.032  0.67 30.27           C
ATOM    188  O   GLU    23     -27.261 -35.394 147.104  0.67 30.27           O
ATOM    189  N   LEU    24     -26.934 -34.957 149.291  0.67 48.67           N
ATOM    190  CA  LEU    24     -26.602 -36.316 149.606  0.67 48.67           C
ATOM    191  CB  LEU    24     -26.199 -36.514 151.074  0.67 48.67           C
ATOM    192  CG  LEU    24     -24.851 -35.862 151.412  0.67 48.67           C
ATOM    193  CD1 LEU    24     -24.478 -36.078 152.886  0.67 48.67           C
ATOM    194  CD2 LEU    24     -23.760 -36.339 150.436  0.67 48.67           C
ATOM    195  C   LEU    24     -27.779 -37.191 149.345  0.67 48.67           C
ATOM    196  O   LEU    24     -27.636 -38.292 148.818  0.67 48.67           O
ATOM    197  N   LYS    25     -28.983 -36.719 149.706  0.67 89.88           N
ATOM    198  CA  LYS    25     -30.163 -37.510 149.520  0.67 89.88           C
ATOM    199  CB  LYS    25     -31.445 -36.792 149.982  0.67 89.88           C
ATOM    200  CG  LYS    25     -31.647 -36.742 151.498  0.67 89.88           C
ATOM    201  CD  LYS    25     -31.866 -38.117 152.130  0.67 89.88           C
ATOM    202  CE  LYS    25     -32.284 -38.054 153.600  0.50 89.88           C
ATOM    203  NZ  LYS    25     -32.616 -39.410 154.090  0.50 89.88           N
ATOM    204  C   LYS    25     -30.324 -37.782 148.059  0.67 89.88           C
ATOM    205  O   LYS    25     -30.619 -38.908 147.662  0.67 89.88           O
ATOM    206  N   ALA    26     -30.107 -36.758 147.214  0.67 23.33           N
ATOM    207  CA  ALA    26     -30.295 -36.922 145.803  0.67 23.33           C
ATOM    208  CB  ALA    26     -30.002 -35.637 145.011  0.67 23.33           C
ATOM    209  C   ALA    26     -29.348 -37.972 145.316  0.67 23.33           C
ATOM    210  O   ALA    26     -29.713 -38.824 144.507  0.67 23.33           O
ATOM    211  N   GLU    27     -28.103 -37.946 145.819  0.67106.04           N
ATOM    212  CA  GLU    27     -27.094 -38.872 145.389  0.67106.04           C
ATOM    213  CB  GLU    27     -25.777 -38.665 146.162  0.67106.04           C
ATOM    214  CG  GLU    27     -24.697 -39.713 145.883  0.67106.04           C
ATOM    215  CD  GLU    27     -23.917 -39.303 144.647  0.67106.04           C
ATOM    216  OE1 GLU    27     -24.247 -38.237 144.063  0.67106.04           O
ATOM    217  OE2 GLU    27     -22.974 -40.050 144.276  0.67106.04           O
ATOM    218  C   GLU    27     -27.535 -40.267 145.692  0.67106.04           C
ATOM    219  O   GLU    27     -27.478 -41.153 144.839  0.67106.04           O
ATOM    220  N   LEU    28     -28.017 -40.486 146.926  0.67136.67           N
ATOM    221  CA  LEU    28     -28.359 -41.806 147.358  0.67136.67           C
ATOM    222  CB  LEU    28     -28.833 -41.815 148.822  0.67136.67           C
ATOM    223  CG  LEU    28     -28.820 -43.192 149.517  0.67136.67           C
ATOM    224  CD1 LEU    28     -29.647 -43.163 150.809  0.67136.67           C
ATOM    225  CD2 LEU    28     -29.183 -44.350 148.582  0.67136.67           C
ATOM    226  C   LEU    28     -29.499 -42.276 146.512  0.67136.67           C
ATOM    227  O   LEU    28     -29.498 -43.406 146.026  0.67136.67           O
ATOM    228  N   ALA    29     -30.490 -41.393 146.279  0.67 38.47           N
ATOM    229  CA  ALA    29     -31.673 -41.784 145.569  0.67 38.47           C
ATOM    230  CB  ALA    29     -32.672 -40.629 145.400  0.67 38.47           C
ATOM    231  C   ALA    29     -31.288 -42.236 144.204  0.67 38.47           C
ATOM    232  O   ALA    29     -31.777 -43.255 143.720  0.67 38.47           O
ATOM    233  N   SER    30     -30.381 -41.495 143.549  0.67 95.29           N
ATOM    234  CA  SER    30     -30.002 -41.862 142.221  0.67 95.29           C
ATOM    235  CB  SER    30     -28.986 -40.892 141.594  0.67 95.29           C
ATOM    236  OG  SER    30     -28.660 -41.312 140.277  1.00 95.29           O
ATOM    237  C   SER    30     -29.365 -43.217 142.259  0.67 95.29           C
ATOM    238  O   SER    30     -29.621 -44.057 141.401  0.67 95.29           O
ATOM    239  N   LEU    31     -28.532 -43.480 143.280  0.67115.54           N
ATOM    240  CA  LEU    31     -27.810 -44.722 143.367  0.67115.54           C
ATOM    241  CB  LEU    31     -26.920 -44.787 144.620  0.67115.54           C
ATOM    242  CG  LEU    31     -25.726 -43.816 144.577  0.67115.54           C
ATOM    243  CD1 LEU    31     -24.980 -43.794 145.915  0.67115.54           C
ATOM    244  CD2 LEU    31     -24.779 -44.149 143.414  0.67115.54           C
ATOM    245  C   LEU    31     -28.774 -45.859 143.453  0.67115.54           C
ATOM    246  O   LEU    31     -28.623 -46.864 142.760  0.67115.54           O
ATOM    247  N   ARG    32     -29.805 -45.726 144.302  0.67109.49           N
ATOM    248  CA  ARG    32     -30.726 -46.807 144.478  0.67109.49           C
ATOM    249  CB  ARG    32     -31.756 -46.541 145.587  0.67109.49           C
ATOM    250  CG  ARG    32     -31.148 -46.696 146.983  0.67109.49           C
ATOM    251  CD  ARG    32     -32.130 -46.445 148.127  0.67109.49           C
ATOM    252  NE  ARG    32     -31.445 -46.826 149.395  0.50109.49           N
ATOM    253  CZ  ARG    32     -31.749 -46.182 150.560  0.50109.49           C
ATOM    254  NH1 ARG    32     -32.623 -45.134 150.553  0.50109.49           N
ATOM    255  NH2 ARG    32     -31.181 -46.586 151.735  0.50109.49           N
ATOM    256  C   ARG    32     -31.443 -47.050 143.194  0.67109.49           C
ATOM    257  O   ARG    32     -31.650 -48.196 142.800  0.67109.49           O
ATOM    258  N   VAL    33     -31.821 -45.970 142.491  0.67 50.41           N
ATOM    259  CA  VAL    33     -32.531 -46.125 141.258  0.67 50.41           C
ATOM    260  CB  VAL    33     -32.868 -44.815 140.611  0.67 50.41           C
ATOM    261  CG1 VAL    33     -33.549 -45.109 139.264  0.67 50.41           C
ATOM    262  CG2 VAL    33     -33.731 -43.987 141.579  0.67 50.41           C
ATOM    263  C   VAL    33     -31.642 -46.870 140.318  0.67 50.41           C
ATOM    264  O   VAL    33     -32.089 -47.766 139.603  0.67 50.41           O
ATOM    265  N   ALA    34     -30.343 -46.523 140.317  0.67 80.49           N
ATOM    266  CA  ALA    34     -29.401 -47.139 139.433  0.67 80.49           C
ATOM    267  CB  ALA    34     -27.979 -46.576 139.594  0.67 80.49           C
ATOM    268  C   ALA    34     -29.351 -48.596 139.747  0.67 80.49           C
ATOM    269  O   ALA    34     -29.289 -49.437 138.852  0.67 80.49           O
ATOM    270  N   LYS    35     -29.404 -48.934 141.043  0.67120.34           N
ATOM    271  CA  LYS    35     -29.321 -50.302 141.451  0.67120.34           C
ATOM    272  CB  LYS    35     -29.469 -50.443 142.976  0.67120.34           C
ATOM    273  CG  LYS    35     -29.337 -51.872 143.496  0.67120.34           C
ATOM    274  CD  LYS    35     -29.278 -51.950 145.023  0.67120.34           C
ATOM    275  CE  LYS    35     -27.972 -51.428 145.620  0.67120.34           C
ATOM    276  NZ  LYS    35     -26.875 -52.380 145.339  0.67120.34           N
ATOM    277  C   LYS    35     -30.452 -51.047 140.814  0.67120.34           C
ATOM    278  O   LYS    35     -30.263 -52.144 140.291  0.67120.34           O
ATOM    279  N   VAL    36     -31.660 -50.451 140.818  0.67 33.53           N
ATOM    280  CA  VAL    36     -32.813 -51.114 140.281  0.67 33.53           C
ATOM    281  CB  VAL    36     -34.057 -50.285 140.388  0.67 33.53           C
ATOM    282  CG1 VAL    36     -35.220 -51.056 139.739  0.50 33.53           C
ATOM    283  CG2 VAL    36     -34.279 -49.937 141.870  0.50 33.53           C
ATOM    284  C   VAL    36     -32.560 -51.379 138.832  0.67 33.53           C
ATOM    285  O   VAL    36     -32.829 -52.468 138.328  0.67 33.53           O
ATOM    286  N   THR    37     -32.002 -50.374 138.137  0.67 60.50           N
ATOM    287  CA  THR    37     -31.682 -50.448 136.741  0.67 60.50           C
ATOM    288  CB  THR    37     -31.038 -49.187 136.254  0.67 60.50           C
ATOM    289  OG1 THR    37     -31.938 -48.094 136.359  0.00 60.50           O
ATOM    290  CG2 THR    37     -30.564 -49.391 134.812  0.00 60.50           C
ATOM    291  C   THR    37     -30.673 -51.529 136.553  0.67 60.50           C
ATOM    292  O   THR    37     -30.703 -52.262 135.565  0.67 60.50           O
ATOM    293  N   GLY    38     -29.749 -51.667 137.516  0.67 34.54           N
ATOM    294  CA  GLY    38     -28.705 -52.630 137.351  0.67 34.54           C
ATOM    295  C   GLY    38     -27.577 -51.937 136.658  0.67 34.54           C
ATOM    296  O   GLY    38     -26.733 -52.573 136.030  0.67 34.54           O
ATOM    297  N   GLY    39     -27.535 -50.596 136.773  0.67 89.60           N
ATOM    298  CA  GLY    39     -26.535 -49.803 136.119  0.67 89.60           C
ATOM    299  C   GLY    39     -25.210 -49.963 136.798  0.67 89.60           C
ATOM    300  O   GLY    39     -25.131 -50.490 137.907  0.67 89.60           O
ATOM    301  N   ALA    40     -24.169 -49.426 136.111  0.50284.97           N
ATOM    302  CA  ALA    40     -22.739 -49.407 136.337  0.50284.97           C
ATOM    303  CB  ALA    40     -22.168 -47.987 136.506  0.50284.97           C
ATOM    304  C   ALA    40     -22.309 -50.221 137.510  0.50284.97           C
ATOM    305  O   ALA    40     -22.756 -50.084 138.643  0.50284.97           O
ATOM    306  N   PRO    41     -21.340 -51.033 137.235  0.50222.79           N
ATOM    307  CA  PRO    41     -20.889 -51.987 138.201  0.50222.79           C
ATOM    308  CD  PRO    41     -21.094 -51.471 135.870  1.00222.79           C
ATOM    309  CB  PRO    41     -19.917 -52.895 137.452  0.50222.79           C
ATOM    310  CG  PRO    41     -20.432 -52.853 136.001  1.00222.79           C
ATOM    311  C   PRO    41     -20.353 -51.457 139.490  0.50222.79           C
ATOM    312  O   PRO    41     -20.424 -52.190 140.474  0.50222.79           O
ATOM    313  N   ASN    42     -19.809 -50.228 139.559  0.50255.22           N
ATOM    314  CA  ASN    42     -19.252 -49.921 140.843  0.50255.22           C
ATOM    315  CB  ASN    42     -17.723 -49.778 140.853  0.50255.22           C
ATOM    316  CG  ASN    42     -17.065 -51.144 140.803  1.00255.22           C
ATOM    317  OD1 ASN    42     -17.701 -52.154 140.505  1.00255.22           O
ATOM    318  ND2 ASN    42     -15.746 -51.173 141.128  1.00255.22           N
ATOM    319  C   ASN    42     -19.727 -48.641 141.380  0.50255.22           C
ATOM    320  O   ASN    42     -20.098 -47.732 140.643  0.50255.22           O
ATOM    321  N   LYS    43     -19.746 -48.651 142.726  0.67301.65           N
ATOM    322  CA  LYS    43     -19.871 -47.600 143.681  0.67301.65           C
ATOM    323  CB  LYS    43     -20.793 -46.431 143.300  0.67301.65           C
ATOM    324  CG  LYS    43     -20.214 -45.515 142.224  0.50301.65           C
ATOM    325  CD  LYS    43     -18.783 -45.056 142.499  0.50301.65           C
ATOM    326  CE  LYS    43     -18.193 -44.204 141.374  0.50301.65           C
ATOM    327  NZ  LYS    43     -18.042 -45.022 140.150  0.50301.65           N
ATOM    328  C   LYS    43     -20.479 -48.223 144.890  0.67301.65           C
ATOM    329  O   LYS    43     -21.190 -47.562 145.637  0.67301.65           O
ATOM    330  N   LEU    44     -20.164 -49.500 145.161  0.67114.02           N
ATOM    331  CA  LEU    44     -20.833 -50.164 146.243  0.67114.02           C
ATOM    332  CB  LEU    44     -20.379 -51.620 146.424  0.67114.02           C
ATOM    333  CG  LEU    44     -20.689 -52.524 145.219  0.67114.02           C
ATOM    334  CD1 LEU    44     -20.269 -53.975 145.496  0.67114.02           C
ATOM    335  CD2 LEU    44     -22.157 -52.399 144.785  0.67114.02           C
ATOM    336  C   LEU    44     -20.517 -49.453 147.509  0.67114.02           C
ATOM    337  O   LEU    44     -21.393 -49.208 148.337  0.67114.02           O
ATOM    338  N   SER    45     -19.241 -49.080 147.677  0.67 63.06           N
ATOM    339  CA  SER    45     -18.827 -48.449 148.888  0.67 63.06           C
ATOM    340  CB  SER    45     -17.331 -48.097 148.876  0.50 63.06           C
ATOM    341  OG  SER    45     -17.066 -47.166 147.836  0.00 63.06           O
ATOM    342  C   SER    45     -19.582 -47.172 149.037  0.67 63.06           C
ATOM    343  O   SER    45     -20.040 -46.842 150.128  0.67 63.06           O
ATOM    344  N   LYS    46     -19.766 -46.442 147.923  0.67138.28           N
ATOM    345  CA  LYS    46     -20.384 -45.151 147.972  0.67138.28           C
ATOM    346  CB  LYS    46     -20.412 -44.417 146.624  0.67138.28           C
ATOM    347  CG  LYS    46     -19.044 -43.851 146.247  0.67138.28           C
ATOM    348  CD  LYS    46     -18.984 -43.272 144.836  0.67138.28           C
ATOM    349  CE  LYS    46     -20.029 -42.191 144.561  0.50138.28           C
ATOM    350  NZ  LYS    46     -19.875 -41.679 143.181  0.50138.28           N
ATOM    351  C   LYS    46     -21.786 -45.230 148.479  0.67138.28           C
ATOM    352  O   LYS    46     -22.220 -44.342 149.207  0.67138.28           O
ATOM    353  N   ILE    47     -22.556 -46.271 148.123  0.67135.81           N
ATOM    354  CA  ILE    47     -23.910 -46.270 148.587  0.67135.81           C
ATOM    355  CB  ILE    47     -24.736 -47.413 148.050  0.67135.81           C
ATOM    356  CG1 ILE    47     -26.226 -47.154 148.321  0.67135.81           C
ATOM    357  CG2 ILE    47     -24.219 -48.744 148.618  0.67135.81           C
ATOM    358  CD1 ILE    47     -27.160 -48.098 147.570  0.67135.81           C
ATOM    359  C   ILE    47     -23.896 -46.322 150.086  0.67135.81           C
ATOM    360  O   ILE    47     -24.610 -45.574 150.752  0.67135.81           O
ATOM    361  N   LYS    48     -23.047 -47.191 150.659  0.67 97.17           N
ATOM    362  CA  LYS    48     -22.978 -47.351 152.080  0.67 97.17           C
ATOM    363  CB  LYS    48     -21.995 -48.464 152.480  0.50 97.17           C
ATOM    364  CG  LYS    48     -22.011 -48.797 153.970  0.50 97.17           C
ATOM    365  CD  LYS    48     -21.292 -50.110 154.296  0.50 97.17           C
ATOM    366  CE  LYS    48     -19.788 -50.086 154.010  1.00 97.17           C
ATOM    367  NZ  LYS    48     -19.547 -50.044 152.551  1.00 97.17           N
ATOM    368  C   LYS    48     -22.496 -46.072 152.696  0.67 97.17           C
ATOM    369  O   LYS    48     -23.021 -45.623 153.715  0.67 97.17           O
ATOM    370  N   VAL    49     -21.480 -45.446 152.074  0.67119.67           N
ATOM    371  CA  VAL    49     -20.876 -44.271 152.626  0.67119.67           C
ATOM    372  CB  VAL    49     -19.673 -43.791 151.859  0.67119.67           C
ATOM    373  CG1 VAL    49     -18.686 -44.959 151.762  0.50119.67           C
ATOM    374  CG2 VAL    49     -20.091 -43.212 150.500  0.67119.67           C
ATOM    375  C   VAL    49     -21.860 -43.146 152.656  0.67119.67           C
ATOM    376  O   VAL    49     -21.893 -42.378 153.616  0.67119.67           O
ATOM    377  N   VAL    50     -22.686 -43.010 151.600  0.67144.50           N
ATOM    378  CA  VAL    50     -23.584 -41.895 151.510  0.67144.50           C
ATOM    379  CB  VAL    50     -24.347 -41.813 150.213  0.67144.50           C
ATOM    380  CG1 VAL    50     -23.345 -41.702 149.054  0.67144.50           C
ATOM    381  CG2 VAL    50     -25.311 -43.001 150.099  0.67144.50           C
ATOM    382  C   VAL    50     -24.580 -41.960 152.624  0.67144.50           C
ATOM    383  O   VAL    50     -24.937 -40.936 153.206  0.67144.50           O
ATOM    384  N   ARG    51     -25.064 -43.171 152.948  0.67198.02           N
ATOM    385  CA  ARG    51     -26.060 -43.314 153.968  0.67198.02           C
ATOM    386  CB  ARG    51     -26.500 -44.778 154.140  0.67198.02           C
ATOM    387  CG  ARG    51     -27.683 -44.974 155.086  0.67198.02           C
ATOM    388  CD  ARG    51     -28.092 -46.442 155.238  0.67198.02           C
ATOM    389  NE  ARG    51     -28.512 -46.942 153.895  0.67198.02           N
ATOM    390  CZ  ARG    51     -27.592 -47.469 153.034  0.67198.02           C
ATOM    391  NH1 ARG    51     -26.277 -47.538 153.391  0.67198.02           N
ATOM    392  NH2 ARG    51     -27.993 -47.937 151.815  0.67198.02           N
ATOM    393  C   ARG    51     -25.491 -42.843 155.271  0.67198.02           C
ATOM    394  O   ARG    51     -26.134 -42.096 156.006  0.67198.02           O
ATOM    395  N   LYS    52     -24.251 -43.260 155.585  0.67 88.53           N
ATOM    396  CA  LYS    52     -23.654 -42.876 156.832  0.67 88.53           C
ATOM    397  CB  LYS    52     -22.300 -43.549 157.111  0.67 88.53           C
ATOM    398  CG  LYS    52     -22.450 -44.974 157.644  0.67 88.53           C
ATOM    399  CD  LYS    52     -21.160 -45.792 157.622  0.67 88.53           C
ATOM    400  CE  LYS    52     -21.115 -46.813 156.486  0.67 88.53           C
ATOM    401  NZ  LYS    52     -22.128 -47.866 156.725  0.67 88.53           N
ATOM    402  C   LYS    52     -23.443 -41.400 156.859  0.67 88.53           C
ATOM    403  O   LYS    52     -23.625 -40.765 157.896  0.67 88.53           O
ATOM    404  N   SER    53     -23.054 -40.802 155.720  0.67100.84           N
ATOM    405  CA  SER    53     -22.783 -39.395 155.733  0.67100.84           C
ATOM    406  CB  SER    53     -22.212 -38.865 154.403  0.67100.84           C
ATOM    407  OG  SER    53     -23.153 -39.009 153.352  0.50100.84           O
ATOM    408  C   SER    53     -24.038 -38.650 156.065  0.67100.84           C
ATOM    409  O   SER    53     -24.001 -37.652 156.782  0.67100.84           O
ATOM    410  N   ILE    54     -25.192 -39.136 155.573  0.67 48.54           N
ATOM    411  CA  ILE    54     -26.441 -38.479 155.827  0.67 48.54           C
ATOM    412  CB  ILE    54     -27.588 -39.154 155.133  0.67 48.54           C
ATOM    413  CG1 ILE    54     -27.365 -39.126 153.610  0.67 48.54           C
ATOM    414  CG2 ILE    54     -28.891 -38.471 155.582  0.67 48.54           C
ATOM    415  CD1 ILE    54     -28.301 -40.048 152.831  0.67 48.54           C
ATOM    416  C   ILE    54     -26.683 -38.523 157.299  0.67 48.54           C
ATOM    417  O   ILE    54     -27.132 -37.547 157.900  0.67 48.54           O
ATOM    418  N   ALA    55     -26.377 -39.669 157.927  0.67 24.08           N
ATOM    419  CA  ALA    55     -26.612 -39.795 159.333  0.67 24.08           C
ATOM    420  CB  ALA    55     -26.215 -41.175 159.881  0.67 24.08           C
ATOM    421  C   ALA    55     -25.787 -38.773 160.050  0.67 24.08           C
ATOM    422  O   ALA    55     -26.266 -38.121 160.977  0.67 24.08           O
ATOM    423  N   GLN    56     -24.524 -38.593 159.617  0.67 75.88           N
ATOM    424  CA  GLN    56     -23.632 -37.685 160.282  0.67 75.88           C
ATOM    425  CB  GLN    56     -22.228 -37.666 159.652  0.67 75.88           C
ATOM    426  CG  GLN    56     -21.463 -38.977 159.835  0.50 75.88           C
ATOM    427  CD  GLN    56     -21.050 -39.067 161.297  0.50 75.88           C
ATOM    428  OE1 GLN    56     -21.217 -38.117 162.061  1.00 75.88           O
ATOM    429  NE2 GLN    56     -20.489 -40.238 161.698  1.00 75.88           N
ATOM    430  C   GLN    56     -24.171 -36.292 160.187  0.67 75.88           C
ATOM    431  O   GLN    56     -24.177 -35.553 161.170  0.67 75.88           O
ATOM    432  N   VAL    57     -24.660 -35.896 158.999  0.67 46.45           N
ATOM    433  CA  VAL    57     -25.128 -34.550 158.833  0.67 46.45           C
ATOM    434  CB  VAL    57     -25.611 -34.268 157.438  0.67 46.45           C
ATOM    435  CG1 VAL    57     -26.200 -32.848 157.397  0.50 46.45           C
ATOM    436  CG2 VAL    57     -24.441 -34.480 156.460  0.50 46.45           C
ATOM    437  C   VAL    57     -26.277 -34.326 159.767  0.67 46.45           C
ATOM    438  O   VAL    57     -26.353 -33.302 160.444  0.67 46.45           O
ATOM    439  N   LEU    58     -27.200 -35.298 159.845  0.67 41.85           N
ATOM    440  CA  LEU    58     -28.353 -35.134 160.678  0.67 41.85           C
ATOM    441  CB  LEU    58     -29.323 -36.320 160.585  0.67 41.85           C
ATOM    442  CG  LEU    58     -29.956 -36.473 159.188  0.67 41.85           C
ATOM    443  CD1 LEU    58     -30.922 -37.667 159.135  0.67 41.85           C
ATOM    444  CD2 LEU    58     -30.610 -35.162 158.728  0.67 41.85           C
ATOM    445  C   LEU    58     -27.912 -35.010 162.099  0.67 41.85           C
ATOM    446  O   LEU    58     -28.411 -34.166 162.843  0.67 41.85           O
ATOM    447  N   THR    59     -26.941 -35.842 162.516  0.67112.19           N
ATOM    448  CA  THR    59     -26.538 -35.787 163.888  0.67112.19           C
ATOM    449  CB  THR    59     -25.488 -36.800 164.254  0.67112.19           C
ATOM    450  OG1 THR    59     -24.285 -36.573 163.537  0.67112.19           O
ATOM    451  CG2 THR    59     -26.036 -38.201 163.945  0.67112.19           C
ATOM    452  C   THR    59     -25.990 -34.427 164.178  0.67112.19           C
ATOM    453  O   THR    59     -26.350 -33.816 165.182  0.67112.19           O
ATOM    454  N   VAL    60     -25.125 -33.893 163.292  0.67125.16           N
ATOM    455  CA  VAL    60     -24.530 -32.624 163.599  0.67125.16           C
ATOM    456  CB  VAL    60     -23.484 -32.165 162.621  0.67125.16           C
ATOM    457  CG1 VAL    60     -22.341 -33.187 162.603  0.67125.16           C
ATOM    458  CG2 VAL    60     -24.130 -31.914 161.255  0.67125.16           C
ATOM    459  C   VAL    60     -25.587 -31.566 163.663  0.67125.16           C
ATOM    460  O   VAL    60     -25.572 -30.726 164.560  0.67125.16           O
ATOM    461  N   SER    61     -26.553 -31.580 162.729  0.67 89.48           N
ATOM    462  CA  SER    61     -27.521 -30.520 162.705  0.67 89.48           C
ATOM    463  CB  SER    61     -28.546 -30.671 161.567  0.67 89.48           C
ATOM    464  OG  SER    61     -27.893 -30.580 160.309  1.00 89.48           O
ATOM    465  C   SER    61     -28.284 -30.479 163.991  0.67 89.48           C
ATOM    466  O   SER    61     -28.445 -29.420 164.596  0.67 89.48           O
ATOM    467  N   SER    62     -28.776 -31.635 164.461  0.67 80.13           N
ATOM    468  CA  SER    62     -29.576 -31.607 165.649  0.67 80.13           C
ATOM    469  CB  SER    62     -30.188 -32.977 165.993  0.67 80.13           C
ATOM    470  OG  SER    62     -29.160 -33.909 166.292  1.00 80.13           O
ATOM    471  C   SER    62     -28.728 -31.188 166.797  0.67 80.13           C
ATOM    472  O   SER    62     -29.154 -30.406 167.646  0.67 80.13           O
ATOM    473  N   GLN    63     -27.478 -31.678 166.831  0.67116.42           N
ATOM    474  CA  GLN    63     -26.667 -31.408 167.975  0.67116.42           C
ATOM    475  CB  GLN    63     -25.329 -32.176 167.957  0.67116.42           C
ATOM    476  CG  GLN    63     -24.410 -31.841 166.781  0.67116.42           C
ATOM    477  CD  GLN    63     -23.145 -32.678 166.913  0.67116.42           C
ATOM    478  OE1 GLN    63     -22.248 -32.353 167.688  0.67116.42           O
ATOM    479  NE2 GLN    63     -23.064 -33.789 166.130  0.00116.42           N
ATOM    480  C   GLN    63     -26.410 -29.942 168.110  0.67116.42           C
ATOM    481  O   GLN    63     -26.512 -29.396 169.206  0.67116.42           O
ATOM    482  N   LYS    64     -26.092 -29.252 167.002  0.67 82.32           N
ATOM    483  CA  LYS    64     -25.739 -27.864 167.094  0.67 82.32           C
ATOM    484  CB  LYS    64     -25.209 -27.315 165.759  0.67 82.32           C
ATOM    485  CG  LYS    64     -23.915 -28.007 165.320  1.00 82.32           C
ATOM    486  CD  LYS    64     -23.518 -27.753 163.864  1.00 82.32           C
ATOM    487  CE  LYS    64     -22.474 -26.649 163.701  1.00 82.32           C
ATOM    488  NZ  LYS    64     -22.025 -26.584 162.293  1.00 82.32           N
ATOM    489  C   LYS    64     -26.896 -27.024 167.523  0.67 82.32           C
ATOM    490  O   LYS    64     -26.770 -26.202 168.430  0.67 82.32           O
ATOM    491  N   GLN    65     -28.073 -27.219 166.907  1.00 92.54           N
ATOM    492  CA  GLN    65     -29.147 -26.321 167.214  1.00 92.54           C
ATOM    493  CB  GLN    65     -30.384 -26.545 166.327  1.00 92.54           C
ATOM    494  CG  GLN    65     -31.454 -25.464 166.489  1.00 92.54           C
ATOM    495  CD  GLN    65     -32.454 -25.625 165.353  1.00 92.54           C
ATOM    496  OE1 GLN    65     -32.356 -26.554 164.553  1.00 92.54           O
ATOM    497  NE2 GLN    65     -33.434 -24.686 165.271  1.00 92.54           N
ATOM    498  C   GLN    65     -29.537 -26.461 168.643  1.00 92.54           C
ATOM    499  O   GLN    65     -29.728 -25.464 169.337  1.00 92.54           O
ATOM    500  N   LYS    66     -29.645 -27.706 169.134  1.00136.14           N
ATOM    501  CA  LYS    66     -30.108 -27.864 170.477  1.00136.14           C
ATOM    502  CB  LYS    66     -30.359 -29.328 170.868  1.00136.14           C
ATOM    503  CG  LYS    66     -31.558 -29.937 170.137  1.00136.14           C
ATOM    504  CD  LYS    66     -32.866 -29.176 170.376  1.00136.14           C
ATOM    505  CE  LYS    66     -33.336 -29.205 171.832  1.00136.14           C
ATOM    506  NZ  LYS    66     -34.598 -28.444 171.980  1.00136.14           N
ATOM    507  C   LYS    66     -29.129 -27.298 171.452  1.00136.14           C
ATOM    508  O   LYS    66     -29.496 -26.531 172.340  1.00136.14           O
ATOM    509  N   SER    67     -27.838 -27.626 171.285  1.00 44.18           N
ATOM    510  CA  SER    67     -26.857 -27.227 172.248  1.00 44.18           C
ATOM    511  CB  SER    67     -25.462 -27.799 171.948  1.00 44.18           C
ATOM    512  OG  SER    67     -24.985 -27.297 170.709  1.00 44.18           O
ATOM    513  C   SER    67     -26.751 -25.740 172.282  1.00 44.18           C
ATOM    514  O   SER    67     -26.443 -25.165 173.324  1.00 44.18           O
ATOM    515  N   ALA    68     -26.998 -25.067 171.146  1.00 35.95           N
ATOM    516  CA  ALA    68     -26.843 -23.646 171.143  1.00 35.95           C
ATOM    517  CB  ALA    68     -27.120 -23.026 169.765  1.00 35.95           C
ATOM    518  C   ALA    68     -27.814 -23.041 172.104  1.00 35.95           C
ATOM    519  O   ALA    68     -27.437 -22.223 172.942  1.00 35.95           O
ATOM    520  N   LEU    69     -29.093 -23.449 172.024  1.00104.77           N
ATOM    521  CA  LEU    69     -30.089 -22.858 172.866  1.00104.77           C
ATOM    522  CB  LEU    69     -31.523 -23.287 172.503  1.00104.77           C
ATOM    523  CG  LEU    69     -32.019 -22.721 171.158  1.00104.77           C
ATOM    524  CD1 LEU    69     -31.156 -23.212 169.986  1.00104.77           C
ATOM    525  CD2 LEU    69     -33.516 -23.006 170.952  1.00104.77           C
ATOM    526  C   LEU    69     -29.858 -23.235 174.291  1.00104.77           C
ATOM    527  O   LEU    69     -29.908 -22.394 175.186  1.00104.77           O
ATOM    528  N   ARG    70     -29.561 -24.520 174.528  1.00163.58           N
ATOM    529  CA  ARG    70     -29.449 -25.031 175.858  1.00163.58           C
ATOM    530  CB  ARG    70     -29.184 -26.546 175.849  1.00163.58           C
ATOM    531  CG  ARG    70     -29.333 -27.223 177.208  1.00163.58           C
ATOM    532  CD  ARG    70     -29.305 -28.751 177.119  1.00163.58           C
ATOM    533  NE  ARG    70     -30.602 -29.201 176.532  1.00163.58           N
ATOM    534  CZ  ARG    70     -30.772 -29.275 175.179  1.00163.58           C
ATOM    535  NH1 ARG    70     -29.756 -28.918 174.343  1.00163.58           N
ATOM    536  NH2 ARG    70     -31.961 -29.704 174.664  1.00163.58           N
ATOM    537  C   ARG    70     -28.339 -24.337 176.584  1.00163.58           C
ATOM    538  O   ARG    70     -28.484 -23.982 177.752  1.00163.58           O
ATOM    539  N   GLU    71     -27.198 -24.117 175.910  1.00 92.66           N
ATOM    540  CA  GLU    71     -26.065 -23.523 176.559  1.00 92.66           C
ATOM    541  CB  GLU    71     -24.805 -23.540 175.679  1.00 92.66           C
ATOM    542  CG  GLU    71     -24.957 -22.802 174.351  1.00 92.66           C
ATOM    543  CD  GLU    71     -23.661 -22.982 173.578  1.00 92.66           C
ATOM    544  OE1 GLU    71     -23.369 -24.141 173.181  1.00 92.66           O
ATOM    545  OE2 GLU    71     -22.943 -21.966 173.378  1.00 92.66           O
ATOM    546  C   GLU    71     -26.362 -22.110 176.955  1.00 92.66           C
ATOM    547  O   GLU    71     -26.032 -21.698 178.065  1.00 92.66           O
ATOM    548  N   ALA    72     -27.016 -21.327 176.077  1.00 48.53           N
ATOM    549  CA  ALA    72     -27.253 -19.957 176.425  1.00 48.53           C
ATOM    550  CB  ALA    72     -27.995 -19.173 175.329  1.00 48.53           C
ATOM    551  C   ALA    72     -28.105 -19.945 177.652  1.00 48.53           C
ATOM    552  O   ALA    72     -27.880 -19.174 178.580  1.00 48.53           O
ATOM    553  N   TYR    73     -29.116 -20.823 177.681  1.00 80.45           N
ATOM    554  CA  TYR    73     -30.037 -20.935 178.772  1.00 80.45           C
ATOM    555  CB  TYR    73     -31.285 -21.760 178.432  1.00 80.45           C
ATOM    556  CG  TYR    73     -32.134 -20.874 177.589  1.00 80.45           C
ATOM    557  CD1 TYR    73     -32.927 -19.921 178.188  1.00 80.45           C
ATOM    558  CD2 TYR    73     -32.139 -20.980 176.218  1.00 80.45           C
ATOM    559  CE1 TYR    73     -33.720 -19.091 177.432  1.00 80.45           C
ATOM    560  CE2 TYR    73     -32.930 -20.151 175.456  1.00 80.45           C
ATOM    561  CZ  TYR    73     -33.723 -19.205 176.063  1.00 80.45           C
ATOM    562  OH  TYR    73     -34.537 -18.354 175.285  1.00 80.45           O
ATOM    563  C   TYR    73     -29.395 -21.499 179.999  1.00 80.45           C
ATOM    564  O   TYR    73     -29.815 -21.161 181.104  1.00 80.45           O
ATOM    565  N   LYS    74     -28.386 -22.380 179.832  1.00 73.73           N
ATOM    566  CA  LYS    74     -27.767 -23.107 180.908  1.00 73.73           C
ATOM    567  CB  LYS    74     -26.437 -23.765 180.510  1.00 73.73           C
ATOM    568  CG  LYS    74     -25.864 -24.673 181.595  1.00 73.73           C
ATOM    569  CD  LYS    74     -24.742 -25.576 181.093  1.00 73.73           C
ATOM    570  CE  LYS    74     -24.163 -26.491 182.172  1.00 73.73           C
ATOM    571  NZ  LYS    74     -23.092 -27.330 181.591  1.00 73.73           N
ATOM    572  C   LYS    74     -27.518 -22.232 182.095  1.00 73.73           C
ATOM    573  O   LYS    74     -27.117 -21.076 181.976  1.00 73.73           O
ATOM    574  N   ASN    75     -27.765 -22.811 183.289  1.00 68.42           N
ATOM    575  CA  ASN    75     -27.630 -22.143 184.551  1.00 68.42           C
ATOM    576  CB  ASN    75     -26.225 -21.557 184.774  1.00 68.42           C
ATOM    577  CG  ASN    75     -25.238 -22.713 184.870  1.00 68.42           C
ATOM    578  OD1 ASN    75     -25.482 -23.699 185.563  1.00 68.42           O
ATOM    579  ND2 ASN    75     -24.092 -22.594 184.147  1.00 68.42           N
ATOM    580  C   ASN    75     -28.624 -21.027 184.661  1.00 68.42           C
ATOM    581  O   ASN    75     -28.321 -19.970 185.210  1.00 68.42           O
ATOM    582  N   LYS    76     -29.849 -21.231 184.143  1.00148.22           N
ATOM    583  CA  LYS    76     -30.870 -20.231 184.262  1.00148.22           C
ATOM    584  CB  LYS    76     -31.133 -19.454 182.960  1.00148.22           C
ATOM    585  CG  LYS    76     -30.036 -18.472 182.556  1.00148.22           C
ATOM    586  CD  LYS    76     -29.876 -17.312 183.536  1.00148.22           C
ATOM    587  CE  LYS    76     -28.788 -16.310 183.142  1.00148.22           C
ATOM    588  NZ  LYS    76     -27.452 -16.937 183.241  1.00148.22           N
ATOM    589  C   LYS    76     -32.142 -20.957 184.524  1.00148.22           C
ATOM    590  O   LYS    76     -32.269 -22.145 184.235  1.00148.22           O
ATOM    591  N   LYS    77     -33.122 -20.250 185.106  1.00163.23           N
ATOM    592  CA  LYS    77     -34.406 -20.848 185.256  1.00163.23           C
ATOM    593  CB  LYS    77     -35.089 -20.540 186.600  1.00163.23           C
ATOM    594  CG  LYS    77     -36.427 -21.263 186.783  1.00163.23           C
ATOM    595  CD  LYS    77     -36.305 -22.789 186.812  1.00163.23           C
ATOM    596  CE  LYS    77     -35.413 -23.320 187.936  1.00163.23           C
ATOM    597  NZ  LYS    77     -36.123 -23.246 189.232  1.00163.23           N
ATOM    598  C   LYS    77     -35.212 -20.247 184.160  1.00163.23           C
ATOM    599  O   LYS    77     -34.754 -19.326 183.487  1.00163.23           O
ATOM    600  N   LEU    78     -36.456 -20.711 183.972  1.00125.79           N
ATOM    601  CA  LEU    78     -37.205 -20.201 182.865  1.00125.79           C
ATOM    602  CB  LEU    78     -37.408 -18.677 182.925  1.00125.79           C
ATOM    603  CG  LEU    78     -38.212 -18.220 184.156  1.00125.79           C
ATOM    604  CD1 LEU    78     -38.414 -16.696 184.170  1.00125.79           C
ATOM    605  CD2 LEU    78     -39.527 -19.003 184.277  1.00125.79           C
ATOM    606  C   LEU    78     -36.496 -20.524 181.586  1.00125.79           C
ATOM    607  O   LEU    78     -36.139 -19.637 180.812  1.00125.79           O
ATOM    608  N   LEU    79     -36.227 -21.830 181.376  1.00 70.93           N
ATOM    609  CA  LEU    79     -35.685 -22.321 180.143  1.00 70.93           C
ATOM    610  CB  LEU    79     -34.707 -23.491 180.332  1.00 70.93           C
ATOM    611  CG  LEU    79     -33.520 -23.157 181.254  1.00 70.93           C
ATOM    612  CD1 LEU    79     -32.503 -24.310 181.293  1.00 70.93           C
ATOM    613  CD2 LEU    79     -32.895 -21.799 180.902  1.00 70.93           C
ATOM    614  C   LEU    79     -36.866 -22.847 179.378  1.00 70.93           C
ATOM    615  O   LEU    79     -37.957 -22.956 179.935  1.00 70.93           O
ATOM    616  N   PRO    80     -36.713 -23.173 178.122  1.00139.15           N
ATOM    617  CA  PRO    80     -37.838 -23.680 177.381  1.00139.15           C
ATOM    618  CD  PRO    80     -35.771 -22.469 177.266  1.00139.15           C
ATOM    619  CB  PRO    80     -37.402 -23.685 175.920  1.00139.15           C
ATOM    620  CG  PRO    80     -36.377 -22.537 175.853  1.00139.15           C
ATOM    621  C   PRO    80     -38.233 -25.015 177.921  1.00139.15           C
ATOM    622  O   PRO    80     -37.376 -25.746 178.411  1.00139.15           O
ATOM    623  N   LEU    81     -39.523 -25.366 177.818  1.00102.62           N
ATOM    624  CA  LEU    81     -40.009 -26.565 178.427  1.00102.62           C
ATOM    625  CB  LEU    81     -41.533 -26.695 178.364  1.00102.62           C
ATOM    626  CG  LEU    81     -42.205 -25.598 179.207  1.00102.62           C
ATOM    627  CD1 LEU    81     -42.014 -24.207 178.582  1.00102.62           C
ATOM    628  CD2 LEU    81     -43.663 -25.936 179.518  1.00102.62           C
ATOM    629  C   LEU    81     -39.367 -27.773 177.829  1.00102.62           C
ATOM    630  O   LEU    81     -39.152 -28.768 178.519  1.00102.62           O
ATOM    631  N   ASP    82     -39.038 -27.732 176.529  1.00 62.55           N
ATOM    632  CA  ASP    82     -38.474 -28.887 175.892  1.00 62.55           C
ATOM    633  CB  ASP    82     -38.129 -28.627 174.419  1.00 62.55           C
ATOM    634  CG  ASP    82     -39.428 -28.416 173.660  1.00 62.55           C
ATOM    635  OD1 ASP    82     -40.375 -29.220 173.864  1.00 62.55           O
ATOM    636  OD2 ASP    82     -39.488 -27.447 172.859  1.00 62.55           O
ATOM    637  C   ASP    82     -37.192 -29.247 176.573  1.00 62.55           C
ATOM    638  O   ASP    82     -36.891 -30.421 176.779  1.00 62.55           O
ATOM    639  N   LEU    83     -36.375 -28.239 176.904  1.00124.38           N
ATOM    640  CA  LEU    83     -35.107 -28.467 177.533  1.00124.38           C
ATOM    641  CB  LEU    83     -34.178 -27.243 177.480  1.00124.38           C
ATOM    642  CG  LEU    83     -33.724 -26.914 176.045  1.00124.38           C
ATOM    643  CD1 LEU    83     -34.888 -26.418 175.176  1.00124.38           C
ATOM    644  CD2 LEU    83     -32.529 -25.954 176.042  1.00124.38           C
ATOM    645  C   LEU    83     -35.275 -28.892 178.959  1.00124.38           C
ATOM    646  O   LEU    83     -34.441 -29.624 179.488  1.00124.38           O
ATOM    647  N   ARG    84     -36.349 -28.429 179.628  1.00 92.19           N
ATOM    648  CA  ARG    84     -36.550 -28.679 181.029  1.00 92.19           C
ATOM    649  CB  ARG    84     -37.822 -28.016 181.587  1.00 92.19           C
ATOM    650  CG  ARG    84     -37.831 -26.490 181.510  1.00 92.19           C
ATOM    651  CD  ARG    84     -39.115 -25.869 182.063  1.00 92.19           C
ATOM    652  NE  ARG    84     -38.989 -24.391 181.926  1.00 92.19           N
ATOM    653  CZ  ARG    84     -40.103 -23.602 181.944  1.00 92.19           C
ATOM    654  NH1 ARG    84     -41.337 -24.161 182.107  1.00 92.19           N
ATOM    655  NH2 ARG    84     -39.979 -22.250 181.804  1.00 92.19           N
ATOM    656  C   ARG    84     -36.699 -30.146 181.304  1.00 92.19           C
ATOM    657  O   ARG    84     -37.272 -30.914 180.531  1.00 92.19           O
ATOM    658  N   PRO    85     -36.171 -30.524 182.440  1.00118.62           N
ATOM    659  CA  PRO    85     -36.215 -31.878 182.923  1.00118.62           C
ATOM    660  CD  PRO    85     -35.860 -29.574 183.495  1.00118.62           C
ATOM    661  CB  PRO    85     -35.521 -31.844 184.281  1.00118.62           C
ATOM    662  CG  PRO    85     -35.813 -30.417 184.782  1.00118.62           C
ATOM    663  C   PRO    85     -37.641 -32.277 183.082  1.00118.62           C
ATOM    664  O   PRO    85     -38.458 -31.442 183.469  1.00118.62           O
ATOM    665  N   LYS    86     -37.964 -33.550 182.797  1.00255.40           N
ATOM    666  CA  LYS    86     -39.317 -33.987 182.937  1.00255.40           C
ATOM    667  CB  LYS    86     -39.781 -34.885 181.778  1.00255.40           C
ATOM    668  CG  LYS    86     -41.283 -35.185 181.759  1.00255.40           C
ATOM    669  CD  LYS    86     -42.140 -34.013 181.272  1.00255.40           C
ATOM    670  CE  LYS    86     -43.630 -34.348 181.177  1.00255.40           C
ATOM    671  NZ  LYS    86     -44.387 -33.175 180.690  1.00255.40           N
ATOM    672  C   LYS    86     -39.362 -34.827 184.159  1.00255.40           C
ATOM    673  O   LYS    86     -38.670 -35.837 184.258  1.00255.40           O
ATOM    674  N   LYS    87     -40.174 -34.399 185.134  1.00280.93           N
ATOM    675  CA  LYS    87     -40.367 -35.115 186.351  1.00280.93           C
ATOM    676  CB  LYS    87     -39.505 -34.617 187.526  1.00280.93           C
ATOM    677  CG  LYS    87     -38.031 -35.018 187.432  1.00280.93           C
ATOM    678  CD  LYS    87     -37.831 -36.533 187.352  1.00280.93           C
ATOM    679  CE  LYS    87     -38.595 -37.312 188.422  1.00280.93           C
ATOM    680  NZ  LYS    87     -38.529 -38.760 188.131  1.00280.93           N
ATOM    681  C   LYS    87     -41.785 -34.842 186.699  1.00280.93           C
ATOM    682  O   LYS    87     -42.675 -34.942 185.855  1.00280.93           O
ATOM    683  N   THR    88     -42.030 -34.509 187.976  1.00146.32           N
ATOM    684  CA  THR    88     -43.354 -34.155 188.376  1.00146.32           C
ATOM    685  CB  THR    88     -43.853 -34.874 189.593  1.00146.32           C
ATOM    686  OG1 THR    88     -43.067 -34.538 190.724  1.00146.32           O
ATOM    687  CG2 THR    88     -43.793 -36.386 189.337  1.00146.32           C
ATOM    688  C   THR    88     -43.287 -32.709 188.727  1.00146.32           C
ATOM    689  O   THR    88     -42.207 -32.168 188.957  1.00146.32           O
ATOM    690  N   ARG    89     -44.446 -32.033 188.759  1.00 96.04           N
ATOM    691  CA  ARG    89     -44.425 -30.634 189.046  1.00 96.04           C
ATOM    692  CB  ARG    89     -45.821 -29.989 188.997  1.00 96.04           C
ATOM    693  CG  ARG    89     -45.787 -28.459 189.041  1.00 96.04           C
ATOM    694  CD  ARG    89     -47.170 -27.812 188.942  1.00 96.04           C
ATOM    695  NE  ARG    89     -46.970 -26.336 188.900  1.00 96.04           N
ATOM    696  CZ  ARG    89     -46.708 -25.731 187.706  1.00 96.04           C
ATOM    697  NH1 ARG    89     -46.642 -26.487 186.573  1.00 96.04           N
ATOM    698  NH2 ARG    89     -46.517 -24.381 187.638  1.00 96.04           N
ATOM    699  C   ARG    89     -43.876 -30.457 190.423  1.00 96.04           C
ATOM    700  O   ARG    89     -43.072 -29.560 190.668  1.00 96.04           O
ATOM    701  N   ALA    90     -44.292 -31.331 191.357  1.00 34.25           N
ATOM    702  CA  ALA    90     -43.876 -31.242 192.726  1.00 34.25           C
ATOM    703  CB  ALA    90     -44.562 -32.287 193.621  1.00 34.25           C
ATOM    704  C   ALA    90     -42.399 -31.454 192.844  1.00 34.25           C
ATOM    705  O   ALA    90     -41.729 -30.751 193.597  1.00 34.25           O
ATOM    706  N   ILE    91     -41.838 -32.425 192.101  1.00 90.43           N
ATOM    707  CA  ILE    91     -40.438 -32.701 192.251  1.00 90.43           C
ATOM    708  CB  ILE    91     -39.964 -33.858 191.418  1.00 90.43           C
ATOM    709  CG1 ILE    91     -40.626 -35.158 191.902  1.00 90.43           C
ATOM    710  CG2 ILE    91     -38.429 -33.902 191.483  1.00 90.43           C
ATOM    711  CD1 ILE    91     -40.347 -35.470 193.371  1.00 90.43           C
ATOM    712  C   ILE    91     -39.663 -31.493 191.844  1.00 90.43           C
ATOM    713  O   ILE    91     -38.711 -31.093 192.513  1.00 90.43           O
ATOM    714  N   ARG    92     -40.076 -30.868 190.732  1.00 78.82           N
ATOM    715  CA  ARG    92     -39.371 -29.745 190.198  1.00 78.82           C
ATOM    716  CB  ARG    92     -39.994 -29.234 188.888  1.00 78.82           C
ATOM    717  CG  ARG    92     -39.995 -30.281 187.771  1.00 78.82           C
ATOM    718  CD  ARG    92     -40.626 -29.790 186.465  1.00 78.82           C
ATOM    719  NE  ARG    92     -40.557 -30.906 185.478  1.00 78.82           N
ATOM    720  CZ  ARG    92     -41.201 -30.797 184.279  1.00 78.82           C
ATOM    721  NH1 ARG    92     -41.898 -29.662 183.978  1.00 78.82           N
ATOM    722  NH2 ARG    92     -41.145 -31.821 183.379  1.00 78.82           N
ATOM    723  C   ARG    92     -39.400 -28.612 191.176  1.00 78.82           C
ATOM    724  O   ARG    92     -38.389 -27.947 191.392  1.00 78.82           O
ATOM    725  N   ARG    93     -40.557 -28.374 191.813  1.00178.58           N
ATOM    726  CA  ARG    93     -40.722 -27.258 192.701  1.00178.58           C
ATOM    727  CB  ARG    93     -42.182 -27.040 193.133  1.00178.58           C
ATOM    728  CG  ARG    93     -42.828 -28.246 193.807  1.00178.58           C
ATOM    729  CD  ARG    93     -44.318 -28.049 194.068  1.00178.58           C
ATOM    730  NE  ARG    93     -44.918 -27.544 192.802  1.00178.58           N
ATOM    731  CZ  ARG    93     -46.121 -26.900 192.832  1.00178.58           C
ATOM    732  NH1 ARG    93     -46.778 -26.743 194.017  1.00178.58           N
ATOM    733  NH2 ARG    93     -46.666 -26.412 191.680  1.00178.58           N
ATOM    734  C   ARG    93     -39.852 -27.385 193.918  1.00178.58           C
ATOM    735  O   ARG    93     -39.424 -26.376 194.474  1.00178.58           O
ATOM    736  N   ARG    94     -39.551 -28.622 194.354  1.00122.55           N
ATOM    737  CA  ARG    94     -38.835 -28.888 195.575  1.00122.55           C
ATOM    738  CB  ARG    94     -38.381 -30.351 195.696  1.00122.55           C
ATOM    739  CG  ARG    94     -39.535 -31.340 195.853  1.00122.55           C
ATOM    740  CD  ARG    94     -39.668 -31.917 197.264  1.00122.55           C
ATOM    741  NE  ARG    94     -38.512 -32.833 197.474  1.00122.55           N
ATOM    742  CZ  ARG    94     -38.622 -34.148 197.126  1.00122.55           C
ATOM    743  NH1 ARG    94     -39.799 -34.619 196.619  1.00122.55           N
ATOM    744  NH2 ARG    94     -37.559 -34.990 197.281  1.00122.55           N
ATOM    745  C   ARG    94     -37.606 -28.039 195.699  1.00122.55           C
ATOM    746  O   ARG    94     -36.989 -27.628 194.718  1.00122.55           O
ATOM    747  N   LEU    95     -37.231 -27.749 196.962  1.00 51.40           N
ATOM    748  CA  LEU    95     -36.094 -26.929 197.251  1.00 51.40           C
ATOM    749  CB  LEU    95     -35.999 -26.485 198.722  1.00 51.40           C
ATOM    750  CG  LEU    95     -37.122 -25.523 199.150  1.00 51.40           C
ATOM    751  CD1 LEU    95     -36.973 -25.115 200.624  1.00 51.40           C
ATOM    752  CD2 LEU    95     -37.219 -24.318 198.201  1.00 51.40           C
ATOM    753  C   LEU    95     -34.862 -27.707 196.932  1.00 51.40           C
ATOM    754  O   LEU    95     -34.875 -28.937 196.881  1.00 51.40           O
ATOM    755  N   THR    96     -33.764 -26.970 196.686  1.00 57.90           N
ATOM    756  CA  THR    96     -32.506 -27.560 196.352  1.00 57.90           C
ATOM    757  CB  THR    96     -31.522 -26.547 195.841  1.00 57.90           C
ATOM    758  OG1 THR    96     -32.093 -25.821 194.765  1.00 57.90           O
ATOM    759  CG2 THR    96     -30.258 -27.269 195.344  1.00 57.90           C
ATOM    760  C   THR    96     -31.952 -28.092 197.633  1.00 57.90           C
ATOM    761  O   THR    96     -32.459 -27.790 198.712  1.00 57.90           O
ATOM    762  N   LYS    97     -30.896 -28.919 197.541  1.00133.31           N
ATOM    763  CA  LYS    97     -30.297 -29.474 198.714  1.00133.31           C
ATOM    764  CB  LYS    97     -29.121 -30.411 198.385  1.00133.31           C
ATOM    765  CG  LYS    97     -28.680 -31.289 199.557  1.00133.31           C
ATOM    766  CD  LYS    97     -28.174 -30.509 200.771  1.00133.31           C
ATOM    767  CE  LYS    97     -27.739 -31.405 201.935  1.00133.31           C
ATOM    768  NZ  LYS    97     -26.508 -32.144 201.576  1.00133.31           N
ATOM    769  C   LYS    97     -29.764 -28.333 199.519  1.00133.31           C
ATOM    770  O   LYS    97     -29.876 -28.317 200.744  1.00133.31           O
ATOM    771  N   HIS    98     -29.187 -27.325 198.839  1.00 79.17           N
ATOM    772  CA  HIS    98     -28.604 -26.224 199.548  1.00 79.17           C
ATOM    773  ND1 HIS    98     -28.111 -22.882 199.740  1.00 79.17           N
ATOM    774  CG  HIS    98     -27.414 -23.976 199.275  1.00 79.17           C
ATOM    775  CB  HIS    98     -28.050 -25.152 198.592  1.00 79.17           C
ATOM    776  NE2 HIS    98     -25.963 -22.503 200.182  1.00 79.17           N
ATOM    777  CD2 HIS    98     -26.105 -23.728 199.555  1.00 79.17           C
ATOM    778  CE1 HIS    98     -27.195 -22.033 200.271  1.00 79.17           C
ATOM    779  C   HIS    98     -29.679 -25.594 200.366  1.00 79.17           C
ATOM    780  O   HIS    98     -29.550 -25.456 201.581  1.00 79.17           O
ATOM    781  N   GLN    99     -30.795 -25.224 199.717  1.00148.02           N
ATOM    782  CA  GLN    99     -31.882 -24.661 200.454  1.00148.02           C
ATOM    783  CB  GLN    99     -32.712 -23.695 199.593  1.00148.02           C
ATOM    784  CG  GLN    99     -33.284 -24.322 198.320  1.00148.02           C
ATOM    785  CD  GLN    99     -33.862 -23.193 197.481  1.00148.02           C
ATOM    786  OE1 GLN    99     -33.907 -22.046 197.922  1.00148.02           O
ATOM    787  NE2 GLN    99     -34.320 -23.518 196.242  1.00148.02           N
ATOM    788  C   GLN    99     -32.699 -25.829 200.883  1.00148.02           C
ATOM    789  O   GLN    99     -33.724 -26.167 200.296  1.00148.02           O
ATOM    790  N   ALA   100     -32.226 -26.480 201.955  1.00181.15           N
ATOM    791  CA  ALA   100     -32.812 -27.677 202.470  1.00181.15           C
ATOM    792  CB  ALA   100     -32.630 -28.889 201.542  1.00181.15           C
ATOM    793  C   ALA   100     -32.021 -27.934 203.691  1.00181.15           C
ATOM    794  O   ALA   100     -32.553 -28.060 204.793  1.00181.15           O
ATOM    795  N   SER   101     -30.694 -28.024 203.488  1.00 82.67           N
ATOM    796  CA  SER   101     -29.812 -28.194 204.593  1.00 82.67           C
ATOM    797  CB  SER   101     -28.330 -28.153 204.185  1.00 82.67           C
ATOM    798  OG  SER   101     -28.011 -26.900 203.597  1.00 82.67           O
ATOM    799  C   SER   101     -30.096 -27.037 205.481  1.00 82.67           C
ATOM    800  O   SER   101     -30.077 -27.169 206.704  1.00 82.67           O
ATOM    801  N   LEU   102     -30.394 -25.870 204.870  1.00131.05           N
ATOM    802  CA  LEU   102     -30.754 -24.697 205.616  1.00131.05           C
ATOM    803  CB  LEU   102     -32.143 -24.779 206.281  1.00131.05           C
ATOM    804  CG  LEU   102     -33.313 -24.854 205.283  1.00131.05           C
ATOM    805  CD1 LEU   102     -34.664 -24.929 206.011  1.00131.05           C
ATOM    806  CD2 LEU   102     -33.250 -23.701 204.268  1.00131.05           C
ATOM    807  C   LEU   102     -29.739 -24.456 206.685  1.00131.05           C
ATOM    808  O   LEU   102     -28.666 -25.058 206.702  1.00131.05           O
ATOM    809  N   LYS   103     -30.022 -23.501 207.583  1.00 57.90           N
ATOM    810  CA  LYS   103     -29.052 -23.272 208.604  1.00 57.90           C
ATOM    811  CB  LYS   103     -28.099 -22.114 208.276  1.00 57.90           C
ATOM    812  CG  LYS   103     -27.257 -22.343 207.022  1.00 57.90           C
ATOM    813  CD  LYS   103     -26.581 -21.065 206.523  1.00 57.90           C
ATOM    814  CE  LYS   103     -25.731 -21.268 205.270  1.00 57.90           C
ATOM    815  NZ  LYS   103     -25.124 -19.980 204.868  1.00 57.90           N
ATOM    816  C   LYS   103     -29.758 -22.906 209.870  1.00 57.90           C
ATOM    817  O   LYS   103     -30.821 -22.288 209.851  1.00 57.90           O
ATOM    818  N   THR   104     -29.160 -23.280 211.017  1.00 42.48           N
ATOM    819  CA  THR   104     -29.728 -22.953 212.291  1.00 42.48           C
ATOM    820  CB  THR   104     -28.981 -23.564 213.442  1.00 42.48           C
ATOM    821  OG1 THR   104     -29.012 -24.979 213.355  1.00 42.48           O
ATOM    822  CG2 THR   104     -29.598 -23.083 214.766  1.00 42.48           C
ATOM    823  C   THR   104     -29.613 -21.473 212.436  1.00 42.48           C
ATOM    824  O   THR   104     -28.697 -20.854 211.899  1.00 42.48           O
ATOM    825  N   GLU   105     -30.553 -20.855 213.170  1.00 82.89           N
ATOM    826  CA  GLU   105     -30.515 -19.431 213.286  1.00 82.89           C
ATOM    827  CB  GLU   105     -31.679 -18.879 214.132  1.00 82.89           C
ATOM    828  CG  GLU   105     -32.061 -17.436 213.796  1.00 82.89           C
ATOM    829  CD  GLU   105     -30.802 -16.593 213.807  1.00 82.89           C
ATOM    830  OE1 GLU   105     -30.157 -16.513 214.885  1.00 82.89           O
ATOM    831  OE2 GLU   105     -30.458 -16.038 212.729  1.00 82.89           O
ATOM    832  C   GLU   105     -29.235 -19.078 213.975  1.00 82.89           C
ATOM    833  O   GLU   105     -28.536 -18.147 213.576  1.00 82.89           O
ATOM    834  N   ARG   106     -28.890 -19.835 215.030  1.00 67.45           N
ATOM    835  CA  ARG   106     -27.710 -19.550 215.789  1.00 67.45           C
ATOM    836  CB  ARG   106     -27.541 -20.491 216.990  1.00 67.45           C
ATOM    837  CG  ARG   106     -26.285 -20.188 217.805  1.00 67.45           C
ATOM    838  CD  ARG   106     -26.100 -21.113 219.008  1.00 67.45           C
ATOM    839  NE  ARG   106     -24.923 -20.614 219.774  1.00 67.45           N
ATOM    840  CZ  ARG   106     -24.934 -20.639 221.138  1.00 67.45           C
ATOM    841  NH1 ARG   106     -26.025 -21.122 221.803  1.00 67.45           N
ATOM    842  NH2 ARG   106     -23.857 -20.177 221.838  1.00 67.45           N
ATOM    843  C   ARG   106     -26.512 -19.729 214.918  1.00 67.45           C
ATOM    844  O   ARG   106     -25.569 -18.943 214.975  1.00 67.45           O
ATOM    845  N   GLU   107     -26.532 -20.777 214.076  1.00108.41           N
ATOM    846  CA  GLU   107     -25.406 -21.114 213.257  1.00108.41           C
ATOM    847  CB  GLU   107     -25.627 -22.401 212.451  1.00108.41           C
ATOM    848  CG  GLU   107     -24.397 -22.833 211.650  1.00108.41           C
ATOM    849  CD  GLU   107     -23.320 -23.281 212.631  1.00108.41           C
ATOM    850  OE1 GLU   107     -23.453 -22.973 213.845  1.00108.41           O
ATOM    851  OE2 GLU   107     -22.345 -23.937 212.175  1.00108.41           O
ATOM    852  C   GLU   107     -25.130 -20.009 212.289  1.00108.41           C
ATOM    853  O   GLU   107     -23.974 -19.659 212.054  1.00108.41           O
ATOM    854  N   LYS   108     -26.189 -19.402 211.724  1.00 71.70           N
ATOM    855  CA  LYS   108     -25.997 -18.393 210.724  1.00 71.70           C
ATOM    856  CB  LYS   108     -27.323 -17.763 210.273  1.00 71.70           C
ATOM    857  CG  LYS   108     -27.159 -16.679 209.208  1.00 71.70           C
ATOM    858  CD  LYS   108     -28.488 -16.230 208.598  1.00 71.70           C
ATOM    859  CE  LYS   108     -29.135 -17.275 207.686  1.00 71.70           C
ATOM    860  NZ  LYS   108     -30.423 -16.764 207.165  1.00 71.70           N
ATOM    861  C   LYS   108     -25.167 -17.288 211.296  1.00 71.70           C
ATOM    862  O   LYS   108     -24.243 -16.800 210.648  1.00 71.70           O
ATOM    863  N   LYS   109     -25.461 -16.864 212.537  1.00102.62           N
ATOM    864  CA  LYS   109     -24.699 -15.778 213.079  1.00102.62           C
ATOM    865  CB  LYS   109     -25.162 -15.343 214.481  1.00102.62           C
ATOM    866  CG  LYS   109     -26.401 -14.443 214.472  1.00102.62           C
ATOM    867  CD  LYS   109     -27.691 -15.140 214.042  1.00102.62           C
ATOM    868  CE  LYS   109     -28.898 -14.199 214.035  1.00102.62           C
ATOM    869  NZ  LYS   109     -29.124 -13.641 215.386  1.00102.62           N
ATOM    870  C   LYS   109     -23.259 -16.179 213.179  1.00102.62           C
ATOM    871  O   LYS   109     -22.367 -15.401 212.844  1.00102.62           O
ATOM    872  N   LYS   110     -22.993 -17.415 213.635  1.00144.33           N
ATOM    873  CA  LYS   110     -21.646 -17.872 213.835  1.00144.33           C
ATOM    874  CB  LYS   110     -21.608 -19.257 214.506  1.00144.33           C
ATOM    875  CG  LYS   110     -20.216 -19.759 214.896  1.00144.33           C
ATOM    876  CD  LYS   110     -19.330 -20.111 213.702  1.00144.33           C
ATOM    877  CE  LYS   110     -19.933 -21.218 212.835  1.00144.33           C
ATOM    878  NZ  LYS   110     -20.136 -22.443 213.642  1.00144.33           N
ATOM    879  C   LYS   110     -20.927 -17.932 212.524  1.00144.33           C
ATOM    880  O   LYS   110     -19.755 -17.565 212.430  1.00144.33           O
ATOM    881  N   ASP   111     -21.617 -18.381 211.462  1.00 32.49           N
ATOM    882  CA  ASP   111     -20.964 -18.517 210.193  1.00 32.49           C
ATOM    883  CB  ASP   111     -21.913 -19.023 209.094  1.00 32.49           C
ATOM    884  CG  ASP   111     -22.298 -20.459 209.421  1.00 32.49           C
ATOM    885  OD1 ASP   111     -21.618 -21.071 210.288  1.00 32.49           O
ATOM    886  OD2 ASP   111     -23.274 -20.966 208.806  1.00 32.49           O
ATOM    887  C   ASP   111     -20.491 -17.163 209.778  1.00 32.49           C
ATOM    888  O   ASP   111     -19.394 -17.020 209.241  1.00 32.49           O
ATOM    889  N   MET   112     -21.319 -16.129 210.009  1.00101.99           N
ATOM    890  CA  MET   112     -20.950 -14.805 209.608  1.00101.99           C
ATOM    891  CB  MET   112     -22.064 -13.777 209.866  1.00101.99           C
ATOM    892  CG  MET   112     -21.695 -12.355 209.440  1.00101.99           C
ATOM    893  SD  MET   112     -22.994 -11.115 209.724  1.00101.99           S
ATOM    894  CE  MET   112     -22.053  -9.739 209.003  1.00101.99           C
ATOM    895  C   MET   112     -19.744 -14.347 210.374  1.00101.99           C
ATOM    896  O   MET   112     -18.814 -13.786 209.796  1.00101.99           O
ATOM    897  N   TYR   113     -19.717 -14.578 211.702  1.00 94.77           N
ATOM    898  CA  TYR   113     -18.644 -14.034 212.485  1.00 94.77           C
ATOM    899  CB  TYR   113     -18.850 -14.175 214.001  1.00 94.77           C
ATOM    900  CG  TYR   113     -17.888 -13.223 214.625  1.00 94.77           C
ATOM    901  CD1 TYR   113     -18.232 -11.897 214.749  1.00 94.77           C
ATOM    902  CD2 TYR   113     -16.656 -13.638 215.072  1.00 94.77           C
ATOM    903  CE1 TYR   113     -17.369 -10.989 215.315  1.00 94.77           C
ATOM    904  CE2 TYR   113     -15.787 -12.734 215.639  1.00 94.77           C
ATOM    905  CZ  TYR   113     -16.142 -11.411 215.761  1.00 94.77           C
ATOM    906  OH  TYR   113     -15.246 -10.489 216.343  1.00 94.77           O
ATOM    907  C   TYR   113     -17.348 -14.694 212.129  1.00 94.77           C
ATOM    908  O   TYR   113     -16.341 -14.009 211.956  1.00 94.77           O
ATOM    909  N   PHE   114     -17.325 -16.041 212.023  1.00 80.04           N
ATOM    910  CA  PHE   114     -16.085 -16.685 211.680  1.00 80.04           C
ATOM    911  CB  PHE   114     -15.604 -17.702 212.728  1.00 80.04           C
ATOM    912  CG  PHE   114     -15.213 -16.955 213.956  1.00 80.04           C
ATOM    913  CD1 PHE   114     -13.989 -16.331 214.025  1.00 80.04           C
ATOM    914  CD2 PHE   114     -16.061 -16.888 215.036  1.00 80.04           C
ATOM    915  CE1 PHE   114     -13.617 -15.643 215.155  1.00 80.04           C
ATOM    916  CE2 PHE   114     -15.695 -16.200 216.170  1.00 80.04           C
ATOM    917  CZ  PHE   114     -14.471 -15.576 216.229  1.00 80.04           C
ATOM    918  C   PHE   114     -16.261 -17.447 210.399  1.00 80.04           C
ATOM    919  O   PHE   114     -16.786 -18.558 210.369  1.00 80.04           O
ATOM    920  N   PRO   115     -15.792 -16.855 209.341  1.00254.08           N
ATOM    921  CA  PRO   115     -15.904 -17.450 208.032  1.00254.08           C
ATOM    922  CD  PRO   115     -15.830 -15.403 209.275  1.00254.08           C
ATOM    923  CB  PRO   115     -15.710 -16.310 207.034  1.00254.08           C
ATOM    924  CG  PRO   115     -16.144 -15.058 207.812  1.00254.08           C
ATOM    925  C   PRO   115     -14.985 -18.606 207.748  1.00254.08           C
ATOM    926  O   PRO   115     -15.169 -19.217 206.699  1.00254.08           O
ATOM    927  N   ILE   116     -14.008 -18.902 208.632  1.00200.69           N
ATOM    928  CA  ILE   116     -12.978 -19.898 208.481  1.00200.69           C
ATOM    929  CB  ILE   116     -13.423 -21.342 208.465  1.00200.69           C
ATOM    930  CG1 ILE   116     -12.215 -22.246 208.758  1.00200.69           C
ATOM    931  CG2 ILE   116     -14.085 -21.682 207.120  1.00200.69           C
ATOM    932  CD1 ILE   116     -12.592 -23.701 209.033  1.00200.69           C
ATOM    933  C   ILE   116     -12.199 -19.580 207.255  1.00200.69           C
ATOM    934  O   ILE   116     -12.715 -19.514 206.141  1.00200.69           O
ATOM    935  N   ARG   117     -10.895 -19.362 207.467  1.00160.69           N
ATOM    936  CA  ARG   117     -10.014 -18.958 206.421  1.00160.69           C
ATOM    937  CB  ARG   117      -8.810 -18.168 206.946  1.00160.69           C
ATOM    938  CG  ARG   117      -9.237 -16.969 207.793  1.00160.69           C
ATOM    939  CD  ARG   117      -9.986 -15.890 207.009  1.00160.69           C
ATOM    940  NE  ARG   117     -10.470 -14.884 207.996  1.00160.69           N
ATOM    941  CZ  ARG   117      -9.638 -13.890 208.425  1.00160.69           C
ATOM    942  NH1 ARG   117      -8.356 -13.824 207.962  1.00160.69           N
ATOM    943  NH2 ARG   117     -10.088 -12.965 209.322  1.00160.69           N
ATOM    944  C   ARG   117      -9.494 -20.172 205.728  1.00160.69           C
ATOM    945  O   ARG   117      -9.665 -21.294 206.203  1.00160.69           O
ATOM    946  N   LYS   118      -8.862 -19.964 204.555  1.00 48.23           N
ATOM    947  CA  LYS   118      -8.300 -21.053 203.811  1.00 48.23           C
ATOM    948  CB  LYS   118      -7.713 -20.635 202.453  1.00 48.23           C
ATOM    949  CG  LYS   118      -8.773 -20.130 201.475  1.00 48.23           C
ATOM    950  CD  LYS   118      -8.187 -19.419 200.255  1.00 48.23           C
ATOM    951  CE  LYS   118      -9.249 -18.913 199.277  1.00 48.23           C
ATOM    952  NZ  LYS   118      -8.604 -18.226 198.135  1.00 48.23           N
ATOM    953  C   LYS   118      -7.188 -21.621 204.630  1.00 48.23           C
ATOM    954  O   LYS   118      -6.419 -20.887 205.250  1.00 48.23           O
ATOM    955  N   TYR   119      -7.097 -22.964 204.671  1.00 74.46           N
ATOM    956  CA  TYR   119      -6.096 -23.607 205.468  1.00 74.46           C
ATOM    957  CB  TYR   119      -6.643 -24.045 206.835  1.00 74.46           C
ATOM    958  CG  TYR   119      -7.930 -24.739 206.551  1.00 74.46           C
ATOM    959  CD1 TYR   119      -7.961 -26.054 206.150  1.00 74.46           C
ATOM    960  CD2 TYR   119      -9.118 -24.056 206.682  1.00 74.46           C
ATOM    961  CE1 TYR   119      -9.157 -26.679 205.887  1.00 74.46           C
ATOM    962  CE2 TYR   119     -10.317 -24.674 206.422  1.00 74.46           C
ATOM    963  CZ  TYR   119     -10.338 -25.989 206.023  1.00 74.46           C
ATOM    964  OH  TYR   119     -11.567 -26.628 205.755  1.00 74.46           O
ATOM    965  C   TYR   119      -5.586 -24.818 204.755  1.00 74.46           C
ATOM    966  O   TYR   119      -6.216 -25.330 203.831  1.00 74.46           O
ATOM    967  N   ALA   120      -4.388 -25.280 205.170  1.00 43.86           N
ATOM    968  CA  ALA   120      -3.760 -26.453 204.628  1.00 43.86           C
ATOM    969  CB  ALA   120      -2.235 -26.483 204.825  1.00 43.86           C
ATOM    970  C   ALA   120      -4.324 -27.643 205.336  1.00 43.86           C
ATOM    971  O   ALA   120      -4.961 -27.512 206.380  1.00 43.86           O
ATOM    972  N   ILE   121      -4.107 -28.848 204.772  1.00 51.00           N
ATOM    973  CA  ILE   121      -4.622 -30.042 205.376  1.00 51.00           C
ATOM    974  CB  ILE   121      -4.376 -31.276 204.557  1.00 51.00           C
ATOM    975  CG1 ILE   121      -5.094 -31.169 203.201  1.00 51.00           C
ATOM    976  CG2 ILE   121      -4.813 -32.493 205.387  1.00 51.00           C
ATOM    977  CD1 ILE   121      -4.649 -32.224 202.189  1.00 51.00           C
ATOM    978  C   ILE   121      -3.934 -30.223 206.689  1.00 51.00           C
ATOM    979  O   ILE   121      -2.715 -30.104 206.790  1.00 51.00           O
ATOM    980  N   LYS   122      -4.723 -30.497 207.745  1.00161.85           N
ATOM    981  CA  LYS   122      -4.163 -30.668 209.052  1.00161.85           C
ATOM    982  CB  LYS   122      -5.181 -30.443 210.184  1.00161.85           C
ATOM    983  CG  LYS   122      -5.780 -29.034 210.191  1.00161.85           C
ATOM    984  CD  LYS   122      -4.751 -27.915 210.375  1.00161.85           C
ATOM    985  CE  LYS   122      -4.542 -27.504 211.834  1.00161.85           C
ATOM    986  NZ  LYS   122      -5.776 -26.879 212.361  1.00161.85           N
ATOM    987  C   LYS   122      -3.681 -32.074 209.155  1.00161.85           C
ATOM    988  O   LYS   122      -4.276 -32.993 208.593  1.00161.85           O
ATOM    989  N   VAL   123      -2.562 -32.272 209.873  1.00 69.81           N
ATOM    990  CA  VAL   123      -2.048 -33.594 210.037  1.00 69.81           C
ATOM    991  CB  VAL   123      -0.547 -33.642 210.092  1.00 69.81           C
ATOM    992  CG1 VAL   123      -0.007 -33.180 208.729  1.00 69.81           C
ATOM    993  CG2 VAL   123      -0.052 -32.782 211.268  1.00 69.81           C
ATOM    994  C   VAL   123      -2.604 -34.124 211.354  1.00 69.81           C
ATOM    995  O   VAL   123      -2.463 -33.428 212.394  1.00 69.81           O
ATOM    996  OXT VAL   123      -3.192 -35.238 211.331  1.00 69.81           O
TER     997      VAL   123
TER     998      VAL   123

END
