# Supplementary material for: Uses of Phage Display in Agriculture: Sequence Analysis and Comparative Modeling of Late Embryogenesis Abundant Client Proteins Suggest Protein-Nucleic Acid Binding Functionality
Source: Comput Math Methods Med. 2013 Jul 9;2013:470390. doi: 10.1155/2013/470390 (PMC3727180; doi:10.1155/2013/470390)
Supplement: Supplementary file 1 — LEA client protein homology models. The seven PDB coordinate files are labeled by the TAIR locus identifier of the full-length protein from which the binding region originates. [file 470390.f1.zip › 470390.f1/at3g58680.1.pdb]

ATOM      1  N   ASP    77      52.545 -12.490  -9.203  1.00103.30           N  
ATOM      2  CA  ASP    77      53.592 -12.277 -10.155  1.00103.30           C  
ATOM      3  C   ASP    77      52.984 -12.083 -11.511  1.00103.30           C  
ATOM      4  O   ASP    77      51.951 -12.660 -11.845  1.00103.30           O  
ATOM      5  CB  ASP    77      54.588 -13.446 -10.251  1.00103.30           C  
ATOM      6  CG  ASP    77      53.861 -14.678 -10.777  1.00103.30           C  
ATOM      7  OD1 ASP    77      52.805 -15.045 -10.196  1.00103.30           O  
ATOM      8  OD2 ASP    77      54.368 -15.275 -11.763  1.00103.30           O1-
ATOM      9  N   ARG    78      53.641 -11.242 -12.329  1.00139.93           N  
ATOM     10  CA  ARG    78      53.271 -10.905 -13.675  1.00139.93           C  
ATOM     11  C   ARG    78      53.495 -12.133 -14.504  1.00139.93           C  
ATOM     12  O   ARG    78      54.261 -13.001 -14.091  1.00139.93           O  
ATOM     13  CB  ARG    78      54.171  -9.755 -14.165  1.00139.93           C  
ATOM     14  CG  ARG    78      53.979  -9.240 -15.586  1.00139.93           C  
ATOM     15  CD  ARG    78      54.900  -8.051 -15.891  1.00139.93           C  
ATOM     16  NE  ARG    78      56.227  -8.331 -15.263  1.00139.93           N  
ATOM     17  CZ  ARG    78      56.480  -7.933 -13.981  1.00139.93           C  
ATOM     18  NH1 ARG    78      55.533  -7.246 -13.277  1.00139.93           N1+
ATOM     19  NH2 ARG    78      57.671  -8.244 -13.393  1.00139.93           N  
ATOM     20  N   VAL    79      52.784 -12.275 -15.653  1.00155.40           N  
ATOM     21  CA  VAL    79      52.982 -13.450 -16.458  1.00155.40           C  
ATOM     22  C   VAL    79      54.452 -13.538 -16.753  1.00155.40           C  
ATOM     23  O   VAL    79      55.099 -14.327 -16.085  1.00155.40           O  
ATOM     24  CB  VAL    79      52.181 -13.336 -17.708  1.00155.40           C  
ATOM     25  CG1 VAL    79      50.694 -13.498 -17.350  1.00155.40           C  
ATOM     26  CG2 VAL    79      52.453 -11.925 -18.243  1.00155.40           C  
ATOM     27  N   PRO    80      55.010 -12.995 -17.796  1.00206.76           N  
ATOM     28  CA  PRO    80      56.391 -12.560 -17.738  1.00206.76           C  
ATOM     29  C   PRO    80      56.641 -11.791 -19.005  1.00206.76           C  
ATOM     30  O   PRO    80      55.746 -11.653 -19.840  1.00206.76           O  
ATOM     31  CB  PRO    80      57.293 -13.753 -17.705  1.00206.76           C  
ATOM     32  CG  PRO    80      56.518 -14.660 -18.624  1.00206.76           C  
ATOM     33  CD  PRO    80      55.061 -14.116 -18.709  1.00206.76           C  
ATOM     34  N   THR    81      57.880 -11.318 -19.198  1.00 55.64           N  
ATOM     35  CA  THR    81      58.209 -10.712 -20.451  1.00 55.64           C  
ATOM     36  C   THR    81      58.241 -11.781 -21.504  1.00 55.64           C  
ATOM     37  O   THR    81      57.603 -11.669 -22.551  1.00 55.64           O  
ATOM     38  CB  THR    81      59.571 -10.088 -20.423  1.00 55.64           C  
ATOM     39  CG2 THR    81      59.831  -9.403 -21.774  1.00 55.64           C  
ATOM     40  OG1 THR    81      59.641  -9.136 -19.372  1.00 55.64           O  
ATOM     41  N   GLU    82      58.971 -12.878 -21.220  1.00132.66           N  
ATOM     42  CA  GLU    82      59.166 -13.924 -22.182  1.00132.66           C  
ATOM     43  C   GLU    82      57.885 -14.621 -22.491  1.00132.66           C  
ATOM     44  O   GLU    82      57.601 -14.906 -23.655  1.00132.66           O  
ATOM     45  CB  GLU    82      60.172 -14.991 -21.714  1.00132.66           C  
ATOM     46  CG  GLU    82      60.215 -16.230 -22.613  1.00132.66           C  
ATOM     47  CD  GLU    82      60.742 -15.856 -23.993  1.00132.66           C  
ATOM     48  OE1 GLU    82      60.520 -14.695 -24.437  1.00132.66           O  
ATOM     49  OE2 GLU    82      61.371 -16.741 -24.630  1.00132.66           O1-
ATOM     50  N   LEU    83      57.065 -14.921 -21.465  1.00207.08           N  
ATOM     51  CA  LEU    83      55.923 -15.711 -21.804  1.00207.08           C  
ATOM     52  C   LEU    83      54.975 -14.939 -22.614  1.00207.08           C  
ATOM     53  O   LEU    83      54.284 -15.482 -23.465  1.00207.08           O  
ATOM     54  CB  LEU    83      55.219 -16.412 -20.651  1.00207.08           C  
ATOM     55  CG  LEU    83      56.280 -17.307 -20.011  1.00207.08           C  
ATOM     56  CD1 LEU    83      55.812 -17.980 -18.708  1.00207.08           C  
ATOM     57  CD2 LEU    83      56.893 -18.187 -21.110  1.00207.08           C  
ATOM     58  N   LYS    84      54.879 -13.641 -22.355  1.00175.29           N  
ATOM     59  CA  LYS    84      53.945 -12.928 -23.150  1.00175.29           C  
ATOM     60  C   LYS    84      54.396 -12.843 -24.578  1.00175.29           C  
ATOM     61  O   LYS    84      53.577 -12.892 -25.497  1.00175.29           O  
ATOM     62  CB  LYS    84      53.660 -11.665 -22.434  1.00175.29           C  
ATOM     63  CG  LYS    84      53.316 -12.177 -21.027  1.00175.29           C  
ATOM     64  CD  LYS    84      52.164 -13.183 -20.908  1.00175.29           C  
ATOM     65  CE  LYS    84      52.607 -14.646 -20.834  1.00175.29           C  
ATOM     66  NZ  LYS    84      51.456 -15.511 -20.486  1.00175.29           N1+
ATOM     67  N   LYS    85      55.717 -12.723 -24.814  1.00 69.92           N  
ATOM     68  CA  LYS    85      56.192 -12.741 -26.170  1.00 69.92           C  
ATOM     69  C   LYS    85      55.880 -14.098 -26.723  1.00 69.92           C  
ATOM     70  O   LYS    85      55.460 -14.239 -27.872  1.00 69.92           O  
ATOM     71  CB  LYS    85      57.715 -12.559 -26.296  1.00 69.92           C  
ATOM     72  CG  LYS    85      58.188 -12.577 -27.753  1.00 69.92           C  
ATOM     73  CD  LYS    85      59.641 -12.141 -27.953  1.00 69.92           C  
ATOM     74  CE  LYS    85      60.058 -12.111 -29.424  1.00 69.92           C  
ATOM     75  NZ  LYS    85      59.758 -13.414 -30.057  1.00 69.92           N1+
ATOM     76  N   ALA    86      56.076 -15.141 -25.891  1.00 50.79           N  
ATOM     77  CA  ALA    86      55.848 -16.506 -26.276  1.00 50.79           C  
ATOM     78  C   ALA    86      54.404 -16.677 -26.613  1.00 50.79           C  
ATOM     79  O   ALA    86      54.060 -17.467 -27.491  1.00 50.79           O  
ATOM     80  CB  ALA    86      56.161 -17.508 -25.148  1.00 50.79           C  
ATOM     81  N   ILE    87      53.509 -15.961 -25.909  1.00 84.40           N  
ATOM     82  CA  ILE    87      52.104 -16.140 -26.124  1.00 84.40           C  
ATOM     83  C   ILE    87      51.758 -15.808 -27.539  1.00 84.40           C  
ATOM     84  O   ILE    87      51.076 -16.579 -28.207  1.00 84.40           O  
ATOM     85  CB  ILE    87      51.238 -15.208 -25.328  1.00 84.40           C  
ATOM     86  CG1 ILE    87      51.370 -15.439 -23.819  1.00 84.40           C  
ATOM     87  CG2 ILE    87      49.800 -15.327 -25.863  1.00 84.40           C  
ATOM     88  CD1 ILE    87      50.546 -14.430 -23.025  1.00 84.40           C  
ATOM     89  N   MET    88      52.190 -14.640 -28.043  1.00100.07           N  
ATOM     90  CA  MET    88      51.772 -14.325 -29.377  1.00100.07           C  
ATOM     91  C   MET    88      52.401 -15.257 -30.362  1.00100.07           C  
ATOM     92  O   MET    88      51.726 -15.828 -31.216  1.00100.07           O  
ATOM     93  CB  MET    88      52.112 -12.905 -29.843  1.00100.07           C  
ATOM     94  CG  MET    88      51.319 -12.550 -31.105  1.00100.07           C  
ATOM     95  SD  MET    88      51.719 -10.955 -31.876  1.00100.07           S  
ATOM     96  CE  MET    88      53.196 -11.584 -32.724  1.00100.07           C  
ATOM     97  N   GLN    89      53.721 -15.470 -30.237  1.00109.08           N  
ATOM     98  CA  GLN    89      54.430 -16.259 -31.199  1.00109.08           C  
ATOM     99  C   GLN    89      53.929 -17.666 -31.170  1.00109.08           C  
ATOM    100  O   GLN    89      53.795 -18.302 -32.212  1.00109.08           O  
ATOM    101  CB  GLN    89      55.950 -16.244 -30.967  1.00109.08           C  
ATOM    102  CG  GLN    89      56.379 -16.823 -29.621  1.00109.08           C  
ATOM    103  CD  GLN    89      57.869 -16.558 -29.483  1.00109.08           C  
ATOM    104  NE2 GLN    89      58.644 -16.912 -30.542  1.00109.08           N  
ATOM    105  OE1 GLN    89      58.331 -16.050 -28.464  1.00109.08           O  
ATOM    106  N   ALA    90      53.636 -18.185 -29.967  1.00 60.31           N  
ATOM    107  CA  ALA    90      53.181 -19.532 -29.787  1.00 60.31           C  
ATOM    108  C   ALA    90      51.850 -19.711 -30.444  1.00 60.31           C  
ATOM    109  O   ALA    90      51.570 -20.764 -31.013  1.00 60.31           O  
ATOM    110  CB  ALA    90      53.021 -19.917 -28.306  1.00 60.31           C  
ATOM    111  N   ARG    91      50.979 -18.689 -30.372  1.00300.31           N  
ATOM    112  CA  ARG    91      49.668 -18.852 -30.925  1.00300.31           C  
ATOM    113  C   ARG    91      49.658 -18.374 -32.335  1.00300.31           C  
ATOM    114  O   ARG    91      49.765 -17.182 -32.598  1.00300.31           O  
ATOM    115  CB  ARG    91      48.585 -18.033 -30.205  1.00300.31           C  
ATOM    116  CG  ARG    91      48.192 -18.550 -28.823  1.00300.31           C  
ATOM    117  CD  ARG    91      49.377 -18.698 -27.880  1.00300.31           C  
ATOM    118  NE  ARG    91      48.864 -18.553 -26.496  1.00300.31           N  
ATOM    119  CZ  ARG    91      49.749 -18.581 -25.460  1.00300.31           C  
ATOM    120  NH1 ARG    91      51.047 -18.936 -25.688  1.00300.31           N1+
ATOM    121  NH2 ARG    91      49.337 -18.217 -24.211  1.00300.31           N  
ATOM    122  N   GLY    92      49.472 -19.301 -33.286  1.00276.62           N  
ATOM    123  CA  GLY    92      49.336 -18.925 -34.664  1.00276.62           C  
ATOM    124  C   GLY    92      50.305 -19.650 -35.545  1.00276.62           C  
ATOM    125  O   GLY    92      51.470 -19.268 -35.663  1.00276.62           O  
ATOM    126  N   GLU    93      49.824 -20.731 -36.205  1.00228.44           N  
ATOM    127  CA  GLU    93      50.617 -21.355 -37.225  1.00228.44           C  
ATOM    128  C   GLU    93      50.655 -20.284 -38.246  1.00228.44           C  
ATOM    129  O   GLU    93      51.692 -19.916 -38.794  1.00228.44           O  
ATOM    130  CB  GLU    93      49.918 -22.556 -37.885  1.00228.44           C  
ATOM    131  CG  GLU    93      50.764 -23.268 -38.942  1.00228.44           C  
ATOM    132  CD  GLU    93      51.607 -24.300 -38.213  1.00228.44           C  
ATOM    133  OE1 GLU    93      51.008 -25.107 -37.454  1.00228.44           O  
ATOM    134  OE2 GLU    93      52.854 -24.290 -38.392  1.00228.44           O1-
ATOM    135  N   LYS    94      49.451 -19.739 -38.470  1.00220.67           N  
ATOM    136  CA  LYS    94      49.197 -18.581 -39.255  1.00220.67           C  
ATOM    137  C   LYS    94      48.991 -17.584 -38.178  1.00220.67           C  
ATOM    138  O   LYS    94      49.912 -17.288 -37.417  1.00220.67           O  
ATOM    139  CB  LYS    94      47.897 -18.666 -40.068  1.00220.67           C  
ATOM    140  CG  LYS    94      48.017 -19.547 -41.310  1.00220.67           C  
ATOM    141  CD  LYS    94      49.084 -19.047 -42.286  1.00220.67           C  
ATOM    142  CE  LYS    94      48.861 -17.603 -42.747  1.00220.67           C  
ATOM    143  NZ  LYS    94      49.887 -17.221 -43.744  1.00220.67           N1+
ATOM    144  N   LYS    95      47.782 -17.018 -38.077  1.00108.97           N  
ATOM    145  CA  LYS    95      47.589 -16.178 -36.939  1.00108.97           C  
ATOM    146  C   LYS    95      46.588 -16.855 -36.061  1.00108.97           C  
ATOM    147  O   LYS    95      45.479 -17.156 -36.500  1.00108.97           O  
ATOM    148  CB  LYS    95      47.042 -14.781 -37.280  1.00108.97           C  
ATOM    149  CG  LYS    95      46.845 -13.892 -36.051  1.00108.97           C  
ATOM    150  CD  LYS    95      46.658 -12.410 -36.380  1.00108.97           C  
ATOM    151  CE  LYS    95      46.391 -11.541 -35.151  1.00108.97           C  
ATOM    152  NZ  LYS    95      46.306 -10.119 -35.547  1.00108.97           N1+
ATOM    153  N   LEU    96      46.958 -17.145 -34.797  1.00167.14           N  
ATOM    154  CA  LEU    96      45.988 -17.739 -33.932  1.00167.14           C  
ATOM    155  C   LEU    96      44.931 -16.717 -33.727  1.00167.14           C  
ATOM    156  O   LEU    96      43.768 -17.064 -33.663  1.00167.14           O  
ATOM    157  CB  LEU    96      46.484 -18.146 -32.538  1.00167.14           C  
ATOM    158  CG  LEU    96      45.337 -18.806 -31.748  1.00167.14           C  
ATOM    159  CD1 LEU    96      44.926 -20.134 -32.400  1.00167.14           C  
ATOM    160  CD2 LEU    96      45.655 -18.954 -30.256  1.00167.14           C  
ATOM    161  N   THR    97      45.300 -15.433 -33.583  1.00134.04           N  
ATOM    162  CA  THR    97      44.361 -14.352 -33.440  1.00134.04           C  
ATOM    163  C   THR    97      43.975 -14.205 -32.011  1.00134.04           C  
ATOM    164  O   THR    97      43.740 -15.180 -31.297  1.00134.04           O  
ATOM    165  CB  THR    97      43.103 -14.462 -34.250  1.00134.04           C  
ATOM    166  CG2 THR    97      42.238 -13.223 -33.959  1.00134.04           C  
ATOM    167  OG1 THR    97      43.409 -14.522 -35.634  1.00134.04           O  
ATOM    168  N   GLN    98      43.906 -12.938 -31.568  1.00 63.10           N  
ATOM    169  CA  GLN    98      43.584 -12.603 -30.218  1.00 63.10           C  
ATOM    170  C   GLN    98      42.152 -12.944 -29.926  1.00 63.10           C  
ATOM    171  O   GLN    98      41.843 -13.533 -28.891  1.00 63.10           O  
ATOM    172  CB  GLN    98      43.856 -11.112 -29.951  1.00 63.10           C  
ATOM    173  CG  GLN    98      45.353 -10.801 -30.055  1.00 63.10           C  
ATOM    174  CD  GLN    98      45.605  -9.367 -29.622  1.00 63.10           C  
ATOM    175  NE2 GLN    98      46.799  -9.121 -29.015  1.00 63.10           N  
ATOM    176  OE1 GLN    98      44.766  -8.488 -29.809  1.00 63.10           O  
ATOM    177  N   SER    99      41.238 -12.609 -30.854  1.00 36.87           N  
ATOM    178  CA  SER    99      39.838 -12.848 -30.644  1.00 36.87           C  
ATOM    179  C   SER    99      39.580 -14.320 -30.547  1.00 36.87           C  
ATOM    180  O   SER    99      38.842 -14.772 -29.673  1.00 36.87           O  
ATOM    181  CB  SER    99      38.976 -12.322 -31.802  1.00 36.87           C  
ATOM    182  OG  SER    99      39.280 -13.041 -32.987  1.00 36.87           O  
ATOM    183  N   GLN   100      40.191 -15.108 -31.453  1.00 82.48           N  
ATOM    184  CA  GLN   100      39.962 -16.527 -31.538  1.00 82.48           C  
ATOM    185  C   GLN   100      40.436 -17.203 -30.289  1.00 82.48           C  
ATOM    186  O   GLN   100      39.726 -18.017 -29.700  1.00 82.48           O  
ATOM    187  CB  GLN   100      40.764 -17.186 -32.679  1.00 82.48           C  
ATOM    188  CG  GLN   100      40.447 -16.664 -34.082  1.00 82.48           C  
ATOM    189  CD  GLN   100      39.098 -17.222 -34.508  1.00 82.48           C  
ATOM    190  NE2 GLN   100      38.748 -17.040 -35.809  1.00 82.48           N  
ATOM    191  OE1 GLN   100      38.374 -17.807 -33.703  1.00 82.48           O  
ATOM    192  N   LEU   101      41.658 -16.864 -29.850  1.00121.17           N  
ATOM    193  CA  LEU   101      42.257 -17.477 -28.709  1.00121.17           C  
ATOM    194  C   LEU   101      41.423 -17.116 -27.521  1.00121.17           C  
ATOM    195  O   LEU   101      41.128 -17.960 -26.678  1.00121.17           O  
ATOM    196  CB  LEU   101      43.697 -16.944 -28.529  1.00121.17           C  
ATOM    197  CG  LEU   101      44.517 -17.494 -27.346  1.00121.17           C  
ATOM    198  CD1 LEU   101      43.945 -17.066 -25.992  1.00121.17           C  
ATOM    199  CD2 LEU   101      44.731 -19.008 -27.458  1.00121.17           C  
ATOM    200  N   ALA   102      40.987 -15.843 -27.451  1.00 33.56           N  
ATOM    201  CA  ALA   102      40.230 -15.377 -26.328  1.00 33.56           C  
ATOM    202  C   ALA   102      38.950 -16.145 -26.241  1.00 33.56           C  
ATOM    203  O   ALA   102      38.546 -16.563 -25.158  1.00 33.56           O  
ATOM    204  CB  ALA   102      39.877 -13.882 -26.423  1.00 33.56           C  
ATOM    205  N   HIS   103      38.282 -16.380 -27.384  1.00 90.94           N  
ATOM    206  CA  HIS   103      37.019 -17.060 -27.355  1.00 90.94           C  
ATOM    207  C   HIS   103      37.176 -18.449 -26.817  1.00 90.94           C  
ATOM    208  O   HIS   103      36.371 -18.891 -26.001  1.00 90.94           O  
ATOM    209  CB  HIS   103      36.342 -17.165 -28.732  1.00 90.94           C  
ATOM    210  CG  HIS   103      35.560 -15.940 -29.103  1.00 90.94           C  
ATOM    211  CD2 HIS   103      34.213 -15.776 -29.190  1.00 90.94           C  
ATOM    212  ND1 HIS   103      36.109 -14.721 -29.434  1.00 90.94           N  
ATOM    213  CE1 HIS   103      35.073 -13.887 -29.704  1.00 90.94           C  
ATOM    214  NE2 HIS   103      33.901 -14.484 -29.570  1.00 90.94           N  
ATOM    215  N   LEU   104      38.216 -19.175 -27.260  1.00129.40           N  
ATOM    216  CA  LEU   104      38.438 -20.534 -26.843  1.00129.40           C  
ATOM    217  C   LEU   104      38.695 -20.562 -25.364  1.00129.40           C  
ATOM    218  O   LEU   104      38.190 -21.424 -24.647  1.00129.40           O  
ATOM    219  CB  LEU   104      39.670 -21.142 -27.541  1.00129.40           C  
ATOM    220  CG  LEU   104      39.983 -22.596 -27.150  1.00129.40           C  
ATOM    221  CD1 LEU   104      38.855 -23.551 -27.570  1.00129.40           C  
ATOM    222  CD2 LEU   104      41.359 -23.028 -27.681  1.00129.40           C  
ATOM    223  N   ILE   105      39.500 -19.600 -24.883  1.00225.87           N  
ATOM    224  CA  ILE   105      39.902 -19.424 -23.512  1.00225.87           C  
ATOM    225  C   ILE   105      38.713 -19.087 -22.687  1.00225.87           C  
ATOM    226  O   ILE   105      38.679 -19.396 -21.496  1.00225.87           O  
ATOM    227  CB  ILE   105      40.798 -18.244 -23.314  1.00225.87           C  
ATOM    228  CG1 ILE   105      42.066 -18.381 -24.138  1.00225.87           C  
ATOM    229  CG2 ILE   105      41.096 -18.127 -21.813  1.00225.87           C  
ATOM    230  CD1 ILE   105      42.867 -19.611 -23.737  1.00225.87           C  
ATOM    231  N   ASN   106      37.723 -18.423 -23.316  1.00 85.36           N  
ATOM    232  CA  ASN   106      36.578 -17.873 -22.652  1.00 85.36           C  
ATOM    233  C   ASN   106      36.981 -16.572 -22.025  1.00 85.36           C  
ATOM    234  O   ASN   106      36.505 -16.194 -20.957  1.00 85.36           O  
ATOM    235  CB  ASN   106      36.009 -18.806 -21.572  1.00 85.36           C  
ATOM    236  CG  ASN   106      35.701 -20.128 -22.263  1.00 85.36           C  
ATOM    237  ND2 ASN   106      36.247 -21.241 -21.701  1.00 85.36           N  
ATOM    238  OD1 ASN   106      35.017 -20.170 -23.284  1.00 85.36           O  
ATOM    239  N   GLU   107      37.885 -15.854 -22.727  1.00120.40           N  
ATOM    240  CA  GLU   107      38.352 -14.544 -22.369  1.00120.40           C  
ATOM    241  C   GLU   107      38.010 -13.655 -23.530  1.00120.40           C  
ATOM    242  O   GLU   107      37.468 -14.118 -24.530  1.00120.40           O  
ATOM    243  CB  GLU   107      39.878 -14.477 -22.202  1.00120.40           C  
ATOM    244  CG  GLU   107      40.400 -15.335 -21.050  1.00120.40           C  
ATOM    245  CD  GLU   107      39.810 -14.778 -19.765  1.00120.40           C  
ATOM    246  OE1 GLU   107      39.946 -13.547 -19.532  1.00120.40           O  
ATOM    247  OE2 GLU   107      39.202 -15.575 -19.002  1.00120.40           O1-
ATOM    248  N   LYS   108      38.284 -12.336 -23.419  1.00 91.24           N  
ATOM    249  CA  LYS   108      37.986 -11.454 -24.513  1.00 91.24           C  
ATOM    250  C   LYS   108      39.260 -11.053 -25.192  1.00 91.24           C  
ATOM    251  O   LYS   108      40.352 -11.438 -24.781  1.00 91.24           O  
ATOM    252  CB  LYS   108      37.147 -10.228 -24.126  1.00 91.24           C  
ATOM    253  CG  LYS   108      35.673 -10.623 -23.991  1.00 91.24           C  
ATOM    254  CD  LYS   108      34.771  -9.599 -23.306  1.00 91.24           C  
ATOM    255  CE  LYS   108      33.295 -10.008 -23.315  1.00 91.24           C  
ATOM    256  NZ  LYS   108      33.153 -11.390 -22.803  1.00 91.24           N1+
ATOM    257  N   PRO   109      39.131 -10.332 -26.274  1.00124.74           N  
ATOM    258  CA  PRO   109      40.279  -9.969 -27.058  1.00124.74           C  
ATOM    259  C   PRO   109      41.258  -9.108 -26.331  1.00124.74           C  
ATOM    260  O   PRO   109      42.454  -9.237 -26.586  1.00124.74           O  
ATOM    261  CB  PRO   109      39.733  -9.352 -28.339  1.00124.74           C  
ATOM    262  CG  PRO   109      38.359 -10.029 -28.501  1.00124.74           C  
ATOM    263  CD  PRO   109      37.914 -10.357 -27.065  1.00124.74           C  
ATOM    264  N   GLN   110      40.792  -8.228 -25.431  1.00 34.79           N  
ATOM    265  CA  GLN   110      41.722  -7.387 -24.743  1.00 34.79           C  
ATOM    266  C   GLN   110      42.579  -8.256 -23.885  1.00 34.79           C  
ATOM    267  O   GLN   110      43.765  -7.987 -23.707  1.00 34.79           O  
ATOM    268  CB  GLN   110      41.074  -6.327 -23.830  1.00 34.79           C  
ATOM    269  CG  GLN   110      40.369  -5.196 -24.584  1.00 34.79           C  
ATOM    270  CD  GLN   110      40.026  -4.104 -23.576  1.00 34.79           C  
ATOM    271  NE2 GLN   110      39.380  -3.007 -24.057  1.00 34.79           N  
ATOM    272  OE1 GLN   110      40.333  -4.221 -22.391  1.00 34.79           O  
ATOM    273  N   VAL   111      41.991  -9.331 -23.330  1.00 36.85           N  
ATOM    274  CA  VAL   111      42.712 -10.168 -22.419  1.00 36.85           C  
ATOM    275  C   VAL   111      43.922 -10.732 -23.097  1.00 36.85           C  
ATOM    276  O   VAL   111      45.030 -10.644 -22.575  1.00 36.85           O  
ATOM    277  CB  VAL   111      41.905 -11.342 -21.942  1.00 36.85           C  
ATOM    278  CG1 VAL   111      42.785 -12.201 -21.015  1.00 36.85           C  
ATOM    279  CG2 VAL   111      40.617 -10.825 -21.283  1.00 36.85           C  
ATOM    280  N   ILE   112      43.741 -11.317 -24.295  1.00 95.29           N  
ATOM    281  CA  ILE   112      44.839 -11.922 -24.991  1.00 95.29           C  
ATOM    282  C   ILE   112      45.821 -10.862 -25.365  1.00 95.29           C  
ATOM    283  O   ILE   112      47.030 -11.043 -25.226  1.00 95.29           O  
ATOM    284  CB  ILE   112      44.398 -12.653 -26.223  1.00 95.29           C  
ATOM    285  CG1 ILE   112      45.597 -13.310 -26.931  1.00 95.29           C  
ATOM    286  CG2 ILE   112      43.592 -11.677 -27.084  1.00 95.29           C  
ATOM    287  CD1 ILE   112      45.208 -14.269 -28.053  1.00 95.29           C  
ATOM    288  N   GLN   113      45.323  -9.706 -25.836  1.00 87.41           N  
ATOM    289  CA  GLN   113      46.214  -8.658 -26.241  1.00 87.41           C  
ATOM    290  C   GLN   113      47.017  -8.239 -25.053  1.00 87.41           C  
ATOM    291  O   GLN   113      48.199  -7.936 -25.187  1.00 87.41           O  
ATOM    292  CB  GLN   113      45.500  -7.407 -26.785  1.00 87.41           C  
ATOM    293  CG  GLN   113      46.477  -6.306 -27.213  1.00 87.41           C  
ATOM    294  CD  GLN   113      45.692  -5.120 -27.763  1.00 87.41           C  
ATOM    295  NE2 GLN   113      44.500  -4.842 -27.170  1.00 87.41           N  
ATOM    296  OE1 GLN   113      46.133  -4.454 -28.700  1.00 87.41           O  
ATOM    297  N   GLU   114      46.386  -8.186 -23.866  1.00 68.18           N  
ATOM    298  CA  GLU   114      47.058  -7.802 -22.657  1.00 68.18           C  
ATOM    299  C   GLU   114      48.077  -8.842 -22.301  1.00 68.18           C  
ATOM    300  O   GLU   114      49.167  -8.509 -21.840  1.00 68.18           O  
ATOM    301  CB  GLU   114      46.106  -7.683 -21.456  1.00 68.18           C  
ATOM    302  CG  GLU   114      45.141  -6.502 -21.556  1.00 68.18           C  
ATOM    303  CD  GLU   114      45.929  -5.227 -21.292  1.00 68.18           C  
ATOM    304  OE1 GLU   114      47.186  -5.299 -21.243  1.00 68.18           O  
ATOM    305  OE2 GLU   114      45.278  -4.161 -21.134  1.00 68.18           O1-
ATOM    306  N   TYR   115      47.743 -10.134 -22.500  1.00104.42           N  
ATOM    307  CA  TYR   115      48.643 -11.205 -22.170  1.00104.42           C  
ATOM    308  C   TYR   115      49.915 -11.116 -22.940  1.00104.42           C  
ATOM    309  O   TYR   115      50.986 -11.186 -22.353  1.00104.42           O  
ATOM    310  CB  TYR   115      48.079 -12.618 -22.441  1.00104.42           C  
ATOM    311  CG  TYR   115      47.529 -13.193 -21.181  1.00104.42           C  
ATOM    312  CD1 TYR   115      48.417 -13.802 -20.326  1.00104.42           C  
ATOM    313  CD2 TYR   115      46.194 -13.163 -20.850  1.00104.42           C  
ATOM    314  CE1 TYR   115      47.997 -14.358 -19.145  1.00104.42           C  
ATOM    315  CE2 TYR   115      45.766 -13.721 -19.663  1.00104.42           C  
ATOM    316  CZ  TYR   115      46.673 -14.314 -18.811  1.00104.42           C  
ATOM    317  OH  TYR   115      46.268 -14.891 -17.591  1.00104.42           O  
ATOM    318  N   GLU   116      49.853 -10.908 -24.261  1.00 67.39           N  
ATOM    319  CA  GLU   116      51.054 -10.919 -25.051  1.00 67.39           C  
ATOM    320  C   GLU   116      51.965  -9.829 -24.578  1.00 67.39           C  
ATOM    321  O   GLU   116      53.177  -9.892 -24.776  1.00 67.39           O  
ATOM    322  CB  GLU   116      50.793 -10.736 -26.556  1.00 67.39           C  
ATOM    323  CG  GLU   116      50.107  -9.420 -26.927  1.00 67.39           C  
ATOM    324  CD  GLU   116      49.938  -9.414 -28.440  1.00 67.39           C  
ATOM    325  OE1 GLU   116      49.279 -10.353 -28.962  1.00 67.39           O  
ATOM    326  OE2 GLU   116      50.470  -8.480 -29.094  1.00 67.39           O1-
ATOM    327  N   SER   117      51.388  -8.782 -23.963  1.00 81.84           N  
ATOM    328  CA  SER   117      52.119  -7.640 -23.496  1.00 81.84           C  
ATOM    329  C   SER   117      53.099  -8.029 -22.438  1.00 81.84           C  
ATOM    330  O   SER   117      54.155  -7.412 -22.314  1.00 81.84           O  
ATOM    331  CB  SER   117      51.206  -6.563 -22.886  1.00 81.84           C  
ATOM    332  OG  SER   117      51.986  -5.469 -22.433  1.00 81.84           O  
ATOM    333  N   GLY   118      52.816  -9.082 -21.657  1.00 60.24           N  
ATOM    334  CA  GLY   118      53.776  -9.358 -20.637  1.00 60.24           C  
ATOM    335  C   GLY   118      53.146  -9.206 -19.295  1.00 60.24           C  
ATOM    336  O   GLY   118      53.791  -9.532 -18.301  1.00 60.24           O  
ATOM    337  N   LYS   119      51.899  -8.686 -19.209  1.00148.41           N  
ATOM    338  CA  LYS   119      51.299  -8.604 -17.904  1.00148.41           C  
ATOM    339  C   LYS   119      49.806  -8.459 -18.033  1.00148.41           C  
ATOM    340  O   LYS   119      49.294  -7.361 -18.239  1.00148.41           O  
ATOM    341  CB  LYS   119      51.813  -7.393 -17.100  1.00148.41           C  
ATOM    342  CG  LYS   119      51.423  -7.393 -15.621  1.00148.41           C  
ATOM    343  CD  LYS   119      52.213  -6.379 -14.785  1.00148.41           C  
ATOM    344  CE  LYS   119      51.576  -4.990 -14.743  1.00148.41           C  
ATOM    345  NZ  LYS   119      52.338  -4.114 -13.824  1.00148.41           N1+
ATOM    346  N   ALA   120      49.083  -9.593 -18.087  1.00131.46           N  
ATOM    347  CA  ALA   120      47.650  -9.729 -18.046  1.00131.46           C  
ATOM    348  C   ALA   120      47.108  -9.812 -16.659  1.00131.46           C  
ATOM    349  O   ALA   120      45.934  -9.542 -16.425  1.00131.46           O  
ATOM    350  CB  ALA   120      47.157 -10.971 -18.800  1.00131.46           C  
ATOM    351  N   ILE   121      47.955 -10.342 -15.762  1.00254.37           N  
ATOM    352  CA  ILE   121      47.753 -10.780 -14.410  1.00254.37           C  
ATOM    353  C   ILE   121      47.227 -12.168 -14.590  1.00254.37           C  
ATOM    354  O   ILE   121      46.062 -12.461 -14.853  1.00254.37           O  
ATOM    355  CB  ILE   121      46.917  -9.907 -13.492  1.00254.37           C  
ATOM    356  CG1 ILE   121      47.241 -10.266 -12.030  1.00254.37           C  
ATOM    357  CG2 ILE   121      45.416 -10.034 -13.793  1.00254.37           C  
ATOM    358  CD1 ILE   121      48.656  -9.884 -11.599  1.00254.37           C  
ATOM    359  N   PRO   122      48.190 -13.027 -14.471  1.00108.43           N  
ATOM    360  CA  PRO   122      48.048 -14.418 -14.778  1.00108.43           C  
ATOM    361  C   PRO   122      46.986 -15.092 -13.990  1.00108.43           C  
ATOM    362  O   PRO   122      47.080 -15.148 -12.765  1.00108.43           O  
ATOM    363  CB  PRO   122      49.420 -15.031 -14.506  1.00108.43           C  
ATOM    364  CG  PRO   122      49.996 -14.127 -13.398  1.00108.43           C  
ATOM    365  CD  PRO   122      49.385 -12.746 -13.692  1.00108.43           C  
ATOM    366  N   ASN   123      45.990 -15.656 -14.692  1.00 66.70           N  
ATOM    367  CA  ASN   123      45.012 -16.475 -14.052  1.00 66.70           C  
ATOM    368  C   ASN   123      45.490 -17.834 -14.418  1.00 66.70           C  
ATOM    369  O   ASN   123      45.573 -18.169 -15.599  1.00 66.70           O  
ATOM    370  CB  ASN   123      43.594 -16.295 -14.625  1.00 66.70           C  
ATOM    371  CG  ASN   123      42.618 -16.983 -13.684  1.00 66.70           C  
ATOM    372  ND2 ASN   123      41.945 -18.057 -14.182  1.00 66.70           N  
ATOM    373  OD1 ASN   123      42.455 -16.577 -12.534  1.00 66.70           O  
ATOM    374  N   GLN   124      45.787 -18.665 -13.410  1.00 64.11           N  
ATOM    375  CA  GLN   124      46.445 -19.916 -13.652  1.00 64.11           C  
ATOM    376  C   GLN   124      45.632 -20.720 -14.605  1.00 64.11           C  
ATOM    377  O   GLN   124      46.177 -21.398 -15.476  1.00 64.11           O  
ATOM    378  CB  GLN   124      46.649 -20.729 -12.366  1.00 64.11           C  
ATOM    379  CG  GLN   124      47.439 -19.946 -11.316  1.00 64.11           C  
ATOM    380  CD  GLN   124      48.604 -19.257 -12.017  1.00 64.11           C  
ATOM    381  NE2 GLN   124      48.693 -17.912 -11.845  1.00 64.11           N  
ATOM    382  OE1 GLN   124      49.401 -19.890 -12.708  1.00 64.11           O  
ATOM    383  N   GLN   125      44.299 -20.654 -14.479  1.00116.01           N  
ATOM    384  CA  GLN   125      43.459 -21.430 -15.338  1.00116.01           C  
ATOM    385  C   GLN   125      43.635 -20.986 -16.761  1.00116.01           C  
ATOM    386  O   GLN   125      43.688 -21.824 -17.661  1.00116.01           O  
ATOM    387  CB  GLN   125      41.974 -21.291 -14.968  1.00116.01           C  
ATOM    388  CG  GLN   125      41.693 -21.813 -13.557  1.00116.01           C  
ATOM    389  CD  GLN   125      40.270 -21.444 -13.174  1.00116.01           C  
ATOM    390  NE2 GLN   125      40.111 -20.256 -12.531  1.00116.01           N  
ATOM    391  OE1 GLN   125      39.327 -22.189 -13.434  1.00116.01           O  
ATOM    392  N   ILE   126      43.723 -19.663 -17.023  1.00158.33           N  
ATOM    393  CA  ILE   126      43.810 -19.242 -18.396  1.00158.33           C  
ATOM    394  C   ILE   126      45.089 -19.615 -19.086  1.00158.33           C  
ATOM    395  O   ILE   126      45.049 -20.093 -20.218  1.00158.33           O  
ATOM    396  CB  ILE   126      43.382 -17.818 -18.655  1.00158.33           C  
ATOM    397  CG1 ILE   126      44.097 -16.777 -17.796  1.00158.33           C  
ATOM    398  CG2 ILE   126      41.859 -17.763 -18.536  1.00158.33           C  
ATOM    399  CD1 ILE   126      43.593 -15.373 -18.136  1.00158.33           C  
ATOM    400  N   LEU   127      46.257 -19.464 -18.438  1.00116.23           N  
ATOM    401  CA  LEU   127      47.475 -19.808 -19.123  1.00116.23           C  
ATOM    402  C   LEU   127      47.423 -21.256 -19.477  1.00116.23           C  
ATOM    403  O   LEU   127      47.907 -21.667 -20.530  1.00116.23           O  
ATOM    404  CB  LEU   127      48.732 -19.607 -18.268  1.00116.23           C  
ATOM    405  CG  LEU   127      48.964 -18.137 -17.887  1.00116.23           C  
ATOM    406  CD1 LEU   127      47.825 -17.584 -17.027  1.00116.23           C  
ATOM    407  CD2 LEU   127      50.326 -17.944 -17.220  1.00116.23           C  
ATOM    408  N   SER   128      46.816 -22.074 -18.600  1.00 48.35           N  
ATOM    409  CA  SER   128      46.788 -23.491 -18.820  1.00 48.35           C  
ATOM    410  C   SER   128      46.203 -23.786 -20.171  1.00 48.35           C  
ATOM    411  O   SER   128      46.797 -24.527 -20.950  1.00 48.35           O  
ATOM    412  CB  SER   128      45.945 -24.240 -17.779  1.00 48.35           C  
ATOM    413  OG  SER   128      46.528 -24.089 -16.492  1.00 48.35           O  
ATOM    414  N   LYS   129      45.023 -23.221 -20.489  1.00105.24           N  
ATOM    415  CA  LYS   129      44.386 -23.486 -21.750  1.00105.24           C  
ATOM    416  C   LYS   129      45.140 -22.867 -22.891  1.00105.24           C  
ATOM    417  O   LYS   129      45.248 -23.462 -23.962  1.00105.24           O  
ATOM    418  CB  LYS   129      42.945 -22.964 -21.827  1.00105.24           C  
ATOM    419  CG  LYS   129      42.201 -23.509 -23.043  1.00105.24           C  
ATOM    420  CD  LYS   129      40.691 -23.315 -22.951  1.00105.24           C  
ATOM    421  CE  LYS   129      39.928 -23.939 -24.121  1.00105.24           C  
ATOM    422  NZ  LYS   129      39.790 -25.395 -23.901  1.00105.24           N1+
ATOM    423  N   LEU   130      45.705 -21.660 -22.681  1.00 82.06           N  
ATOM    424  CA  LEU   130      46.308 -20.907 -23.745  1.00 82.06           C  
ATOM    425  C   LEU   130      47.363 -21.736 -24.407  1.00 82.06           C  
ATOM    426  O   LEU   130      47.353 -21.911 -25.625  1.00 82.06           O  
ATOM    427  CB  LEU   130      47.095 -19.693 -23.212  1.00 82.06           C  
ATOM    428  CG  LEU   130      46.308 -18.565 -22.525  1.00 82.06           C  
ATOM    429  CD1 LEU   130      47.271 -17.502 -21.961  1.00 82.06           C  
ATOM    430  CD2 LEU   130      45.280 -17.941 -23.480  1.00 82.06           C  
ATOM    431  N   GLU   131      48.306 -22.245 -23.595  1.00134.21           N  
ATOM    432  CA  GLU   131      49.445 -23.011 -24.014  1.00134.21           C  
ATOM    433  C   GLU   131      49.063 -24.397 -24.434  1.00134.21           C  
ATOM    434  O   GLU   131      49.649 -24.957 -25.361  1.00134.21           O  
ATOM    435  CB  GLU   131      50.462 -23.189 -22.877  1.00134.21           C  
ATOM    436  CG  GLU   131      50.884 -21.871 -22.229  1.00134.21           C  
ATOM    437  CD  GLU   131      51.387 -20.954 -23.319  1.00134.21           C  
ATOM    438  OE1 GLU   131      51.907 -21.477 -24.339  1.00134.21           O  
ATOM    439  OE2 GLU   131      51.251 -19.714 -23.146  1.00134.21           O1-
ATOM    440  N   ARG   132      48.079 -24.998 -23.741  1.00 91.39           N  
ATOM    441  CA  ARG   132      47.714 -26.377 -23.928  1.00 91.39           C  
ATOM    442  C   ARG   132      47.196 -26.630 -25.311  1.00 91.39           C  
ATOM    443  O   ARG   132      47.507 -27.661 -25.905  1.00 91.39           O  
ATOM    444  CB  ARG   132      46.644 -26.848 -22.927  1.00 91.39           C  
ATOM    445  CG  ARG   132      46.240 -28.315 -23.112  1.00 91.39           C  
ATOM    446  CD  ARG   132      45.178 -28.787 -22.115  1.00 91.39           C  
ATOM    447  NE  ARG   132      44.818 -30.193 -22.456  1.00 91.39           N  
ATOM    448  CZ  ARG   132      43.624 -30.705 -22.037  1.00 91.39           C  
ATOM    449  NH1 ARG   132      42.769 -29.918 -21.320  1.00 91.39           N1+
ATOM    450  NH2 ARG   132      43.277 -31.990 -22.337  1.00 91.39           N  
ATOM    451  N   ALA   133      46.399 -25.705 -25.874  1.00 42.99           N  
ATOM    452  CA  ALA   133      45.836 -25.967 -27.167  1.00 42.99           C  
ATOM    453  C   ALA   133      46.960 -26.139 -28.143  1.00 42.99           C  
ATOM    454  O   ALA   133      46.902 -26.979 -29.039  1.00 42.99           O  
ATOM    455  CB  ALA   133      44.937 -24.822 -27.667  1.00 42.99           C  
ATOM    456  N   LEU   134      47.992 -25.292 -27.999  1.00144.65           N  
ATOM    457  CA  LEU   134      49.193 -25.231 -28.785  1.00144.65           C  
ATOM    458  C   LEU   134      50.060 -26.420 -28.508  1.00144.65           C  
ATOM    459  O   LEU   134      50.670 -26.974 -29.420  1.00144.65           O  
ATOM    460  CB  LEU   134      50.063 -24.052 -28.330  1.00144.65           C  
ATOM    461  CG  LEU   134      49.318 -22.717 -28.144  1.00144.65           C  
ATOM    462  CD1 LEU   134      50.289 -21.631 -27.662  1.00144.65           C  
ATOM    463  CD2 LEU   134      48.534 -22.297 -29.396  1.00144.65           C  
ATOM    464  N   GLY   135      50.153 -26.834 -27.227  1.00 31.74           N  
ATOM    465  CA  GLY   135      51.064 -27.882 -26.868  1.00 31.74           C  
ATOM    466  C   GLY   135      52.406 -27.263 -26.588  1.00 31.74           C  
ATOM    467  O   GLY   135      53.441 -27.892 -26.800  1.00 31.74           O  
ATOM    468  N   ALA   136      52.425 -25.999 -26.107  1.00 50.33           N  
ATOM    469  CA  ALA   136      53.664 -25.325 -25.818  1.00 50.33           C  
ATOM    470  C   ALA   136      53.667 -24.947 -24.367  1.00 50.33           C  
ATOM    471  O   ALA   136      52.625 -24.922 -23.715  1.00 50.33           O  
ATOM    472  CB  ALA   136      53.866 -24.032 -26.627  1.00 50.33           C  
ATOM    473  N   LYS   137      54.868 -24.670 -23.813  1.00185.55           N  
ATOM    474  CA  LYS   137      54.977 -24.361 -22.416  1.00185.55           C  
ATOM    475  C   LYS   137      55.821 -23.131 -22.226  1.00185.55           C  
ATOM    476  O   LYS   137      56.894 -22.984 -22.806  1.00185.55           O  
ATOM    477  CB  LYS   137      55.647 -25.491 -21.619  1.00185.55           C  
ATOM    478  CG  LYS   137      57.033 -25.847 -22.162  1.00185.55           C  
ATOM    479  CD  LYS   137      57.002 -26.495 -23.550  1.00185.55           C  
ATOM    480  CE  LYS   137      58.014 -25.914 -24.540  1.00185.55           C  
ATOM    481  NZ  LYS   137      57.543 -24.595 -25.021  1.00185.55           N1+
ATOM    482  N   LEU   138      55.295 -22.200 -21.413  1.00111.32           N  
ATOM    483  CA  LEU   138      55.865 -20.957 -20.998  1.00111.32           C  
ATOM    484  C   LEU   138      56.940 -21.189 -19.976  1.00111.32           C  
ATOM    485  O   LEU   138      57.849 -20.378 -19.809  1.00111.32           O  
ATOM    486  CB  LEU   138      54.744 -20.071 -20.449  1.00111.32           C  
ATOM    487  CG  LEU   138      53.723 -19.715 -21.550  1.00111.32           C  
ATOM    488  CD1 LEU   138      52.715 -18.658 -21.075  1.00111.32           C  
ATOM    489  CD2 LEU   138      54.427 -19.343 -22.868  1.00111.32           C  
ATOM    490  N   ARG   139      56.824 -22.285 -19.208  1.00152.43           N  
ATOM    491  CA  ARG   139      57.784 -22.586 -18.184  1.00152.43           C  
ATOM    492  C   ARG   139      58.922 -23.332 -18.802  1.00152.43           C  
ATOM    493  O   ARG   139      58.831 -23.815 -19.929  1.00152.43           O  
ATOM    494  CB  ARG   139      57.215 -23.483 -17.072  1.00152.43           C  
ATOM    495  CG  ARG   139      56.061 -22.836 -16.310  1.00152.43           C  
ATOM    496  CD  ARG   139      56.519 -21.838 -15.248  1.00152.43           C  
ATOM    497  NE  ARG   139      57.191 -22.615 -14.170  1.00152.43           N  
ATOM    498  CZ  ARG   139      56.437 -23.187 -13.187  1.00152.43           C  
ATOM    499  NH1 ARG   139      55.076 -23.086 -13.225  1.00152.43           N1+
ATOM    500  NH2 ARG   139      57.043 -23.862 -12.167  1.00152.43           N  
ATOM    501  N   GLY   140      60.051 -23.423 -18.068  1.00 23.36           N  
ATOM    502  CA  GLY   140      61.181 -24.166 -18.550  1.00 23.36           C  
ATOM    503  C   GLY   140      62.173 -23.222 -19.144  1.00 23.36           C  
ATOM    504  O   GLY   140      61.905 -22.034 -19.306  1.00 23.36           O  
ATOM    505  N   LYS   141      63.371 -23.749 -19.471  1.00115.00           N  
ATOM    506  CA  LYS   141      64.398 -22.922 -20.029  1.00115.00           C  
ATOM    507  C   LYS   141      63.899 -22.418 -21.341  1.00115.00           C  
ATOM    508  O   LYS   141      64.019 -21.233 -21.648  1.00115.00           O  
ATOM    509  CB  LYS   141      65.721 -23.673 -20.273  1.00115.00           C  
ATOM    510  CG  LYS   141      65.642 -24.709 -21.394  1.00115.00           C  
ATOM    511  CD  LYS   141      64.582 -25.782 -21.146  1.00115.00           C  
ATOM    512  CE  LYS   141      64.449 -26.790 -22.290  1.00115.00           C  
ATOM    513  NZ  LYS   141      63.463 -27.836 -21.933  1.00115.00           N1+
ATOM    514  N   LYS   142      63.306 -23.309 -22.155  1.00 73.39           N  
ATOM    515  CA  LYS   142      62.790 -22.869 -23.412  1.00 73.39           C  
ATOM    516  C   LYS   142      61.349 -22.443 -23.164  1.00 73.39           C  
ATOM    517  O   LYS   142      60.440 -22.980 -23.852  1.00 73.39           O  
ATOM    518  CB  LYS   142      62.785 -23.965 -24.493  1.00 73.39           C  
ATOM    519  CG  LYS   142      64.187 -24.322 -24.998  1.00 73.39           C  
ATOM    520  CD  LYS   142      64.906 -23.147 -25.664  1.00 73.39           C  
ATOM    521  CE  LYS   142      66.280 -23.491 -26.245  1.00 73.39           C  
ATOM    522  NZ  LYS   142      66.758 -22.377 -27.095  1.00 73.39           N1+
ATOM    523  OXT LYS   142      61.139 -21.575 -22.274  1.00 73.39           O1-
END
