# Supplementary material for: Uses of Phage Display in Agriculture: Sequence Analysis and Comparative Modeling of Late Embryogenesis Abundant Client Proteins Suggest Protein-Nucleic Acid Binding Functionality
Source: Comput Math Methods Med. 2013 Jul 9;2013:470390. doi: 10.1155/2013/470390 (PMC3727180; doi:10.1155/2013/470390)
Supplement: Supplementary file 1 — LEA client protein homology models. The seven PDB coordinate files are labeled by the TAIR locus identifier of the full-length protein from which the binding region originates. [file 470390.f1.zip › 470390.f1/at5g18380.1.pdb]

EXPDTA    THEORETICAL MODEL, MODELLER 9.11 2013/02/12 22:01:57
REMARK   6 MODELLER OBJECTIVE FUNCTION:       963.7469
REMARK   6 MODELLER BEST TEMPLATE % SEQ ID:  68.085
ATOM      1  N   MET     1    -134.572 -79.301  61.270  1.00 69.77           N
ATOM      2  CA  MET     1    -133.470 -78.512  61.861  1.00 69.77           C
ATOM      3  CB  MET     1    -133.913 -77.880  63.189  1.00 69.77           C
ATOM      4  CG  MET     1    -135.047 -76.862  63.054  1.00 69.77           C
ATOM      5  SD  MET     1    -135.567 -76.119  64.630  1.00 69.77           S
ATOM      6  CE  MET     1    -136.207 -77.663  65.338  1.00 69.77           C
ATOM      7  C   MET     1    -132.308 -79.398  62.153  1.00 69.77           C
ATOM      8  O   MET     1    -131.929 -80.243  61.344  1.00 69.77           O
ATOM      9  N   ALA     2    -131.710 -79.214  63.344  1.00192.55           N
ATOM     10  CA  ALA     2    -130.586 -80.012  63.721  1.00192.55           C
ATOM     11  CB  ALA     2    -129.900 -79.543  65.015  1.00192.55           C
ATOM     12  C   ALA     2    -131.083 -81.398  63.947  1.00192.55           C
ATOM     13  O   ALA     2    -132.246 -81.608  64.286  1.00192.55           O
ATOM     14  N   THR     3    -130.198 -82.388  63.737  1.00178.80           N
ATOM     15  CA  THR     3    -130.566 -83.759  63.908  1.00178.80           C
ATOM     16  CB  THR     3    -129.740 -84.668  63.031  1.00178.80           C
ATOM     17  OG1 THR     3    -129.786 -84.186  61.695  1.00178.80           O
ATOM     18  CG2 THR     3    -130.327 -86.093  63.034  1.00178.80           C
ATOM     19  C   THR     3    -130.317 -84.054  65.359  1.00178.80           C
ATOM     20  O   THR     3    -130.208 -83.136  66.170  1.00178.80           O
ATOM     21  N   GLN     4    -130.235 -85.343  65.734  1.00222.34           N
ATOM     22  CA  GLN     4    -130.030 -85.705  67.103  1.00222.34           C
ATOM     23  CB  GLN     4    -129.923 -87.222  67.326  1.00222.34           C
ATOM     24  CG  GLN     4    -131.171 -87.982  66.870  1.00222.34           C
ATOM     25  CD  GLN     4    -132.351 -87.510  67.707  1.00222.34           C
ATOM     26  OE1 GLN     4    -133.508 -87.700  67.332  1.00222.34           O
ATOM     27  NE2 GLN     4    -132.056 -86.877  68.874  1.00222.34           N
ATOM     28  C   GLN     4    -128.743 -85.083  67.524  1.00222.34           C
ATOM     29  O   GLN     4    -127.934 -84.661  66.698  1.00222.34           O
ATOM     30  N   PRO     5    -128.562 -84.985  68.807  1.00156.75           N
ATOM     31  CA  PRO     5    -127.376 -84.352  69.303  1.00156.75           C
ATOM     32  CD  PRO     5    -129.691 -84.805  69.706  1.00156.75           C
ATOM     33  CB  PRO     5    -127.630 -84.093  70.786  1.00156.75           C
ATOM     34  CG  PRO     5    -129.161 -83.939  70.862  1.00156.75           C
ATOM     35  C   PRO     5    -126.149 -85.149  69.019  1.00156.75           C
ATOM     36  O   PRO     5    -126.211 -86.378  69.023  1.00156.75           O
ATOM     37  N   ALA     6    -125.028 -84.452  68.756  1.00 34.48           N
ATOM     38  CA  ALA     6    -123.771 -85.076  68.484  1.00 34.48           C
ATOM     39  CB  ALA     6    -122.786 -84.177  67.718  1.00 34.48           C
ATOM     40  C   ALA     6    -123.159 -85.399  69.801  1.00 34.48           C
ATOM     41  O   ALA     6    -123.671 -85.005  70.848  1.00 34.48           O
ATOM     42  N   THR     7    -122.055 -86.165  69.775  1.00 91.34           N
ATOM     43  CA  THR     7    -121.387 -86.517  70.988  1.00 91.34           C
ATOM     44  CB  THR     7    -120.386 -87.620  70.816  1.00 91.34           C
ATOM     45  OG1 THR     7    -119.347 -87.202  69.942  1.00 91.34           O
ATOM     46  CG2 THR     7    -121.103 -88.848  70.232  1.00 91.34           C
ATOM     47  C   THR     7    -120.638 -85.309  71.443  1.00 91.34           C
ATOM     48  O   THR     7    -120.510 -84.331  70.708  1.00 91.34           O
ATOM     49  N   GLU     8    -120.142 -85.347  72.694  1.00106.69           N
ATOM     50  CA  GLU     8    -119.400 -84.254  73.244  1.00106.69           C
ATOM     51  CB  GLU     8    -119.034 -84.477  74.721  1.00106.69           C
ATOM     52  CG  GLU     8    -118.303 -85.793  74.991  1.00106.69           C
ATOM     53  CD  GLU     8    -119.348 -86.884  75.195  1.00106.69           C
ATOM     54  OE1 GLU     8    -119.796 -87.478  74.179  1.00106.69           O
ATOM     55  OE2 GLU     8    -119.714 -87.134  76.374  1.00106.69           O
ATOM     56  C   GLU     8    -118.137 -84.112  72.454  1.00106.69           C
ATOM     57  O   GLU     8    -117.544 -85.105  72.034  1.00106.69           O
ATOM     58  N   SER     9    -117.712 -82.855  72.201  1.00 47.45           N
ATOM     59  CA  SER     9    -116.517 -82.658  71.433  1.00 47.45           C
ATOM     60  CB  SER     9    -116.689 -83.032  69.951  1.00 47.45           C
ATOM     61  OG  SER     9    -117.693 -82.221  69.358  1.00 47.45           O
ATOM     62  C   SER     9    -116.126 -81.213  71.492  1.00 47.45           C
ATOM     63  O   SER     9    -116.969 -80.334  71.669  1.00 47.45           O
ATOM     64  N   VAL    10    -114.811 -80.942  71.342  1.00 45.85           N
ATOM     65  CA  VAL    10    -114.302 -79.599  71.339  1.00 45.85           C
ATOM     66  CB  VAL    10    -113.645 -79.200  72.629  1.00 45.85           C
ATOM     67  CG1 VAL    10    -114.686 -79.278  73.760  1.00 45.85           C
ATOM     68  CG2 VAL    10    -112.409 -80.090  72.846  1.00 45.85           C
ATOM     69  C   VAL    10    -113.238 -79.524  70.286  1.00 45.85           C
ATOM     70  O   VAL    10    -112.762 -80.545  69.789  1.00 45.85           O
ATOM     71  N   GLN    11    -112.865 -78.291  69.884  1.00106.16           N
ATOM     72  CA  GLN    11    -111.791 -78.138  68.949  1.00106.16           C
ATOM     73  CB  GLN    11    -112.226 -77.609  67.573  1.00106.16           C
ATOM     74  CG  GLN    11    -113.113 -78.598  66.813  1.00106.16           C
ATOM     75  CD  GLN    11    -113.470 -77.989  65.467  1.00106.16           C
ATOM     76  OE1 GLN    11    -113.013 -76.899  65.127  1.00106.16           O
ATOM     77  NE2 GLN    11    -114.309 -78.709  64.676  1.00106.16           N
ATOM     78  C   GLN    11    -110.821 -77.163  69.544  1.00106.16           C
ATOM     79  O   GLN    11    -111.205 -76.258  70.283  1.00106.16           O
ATOM     80  N   CYS    12    -109.519 -77.354  69.255  1.00 86.07           N
ATOM     81  CA  CYS    12    -108.484 -76.501  69.769  1.00 86.07           C
ATOM     82  CB  CYS    12    -107.854 -77.068  71.037  1.00 86.07           C
ATOM     83  SG  CYS    12    -107.285 -78.746  70.684  1.00 86.07           S
ATOM     84  C   CYS    12    -107.396 -76.439  68.735  1.00 86.07           C
ATOM     85  O   CYS    12    -107.542 -76.992  67.646  1.00 86.07           O
ATOM     86  N   PHE    13    -106.282 -75.734  69.044  1.00 56.20           N
ATOM     87  CA  PHE    13    -105.188 -75.637  68.110  1.00 56.20           C
ATOM     88  CB  PHE    13    -105.385 -74.529  67.058  1.00 56.20           C
ATOM     89  CG  PHE    13    -105.578 -73.235  67.776  1.00 56.20           C
ATOM     90  CD1 PHE    13    -104.506 -72.523  68.263  1.00 56.20           C
ATOM     91  CD2 PHE    13    -106.845 -72.728  67.955  1.00 56.20           C
ATOM     92  CE1 PHE    13    -104.694 -71.331  68.923  1.00 56.20           C
ATOM     93  CE2 PHE    13    -107.040 -71.537  68.613  1.00 56.20           C
ATOM     94  CZ  PHE    13    -105.964 -70.834  69.098  1.00 56.20           C
ATOM     95  C   PHE    13    -103.901 -75.353  68.838  1.00 56.20           C
ATOM     96  O   PHE    13    -103.893 -75.059  70.033  1.00 56.20           O
ATOM     97  N   GLY    14    -102.763 -75.453  68.110  1.00 37.77           N
ATOM     98  CA  GLY    14    -101.462 -75.189  68.674  1.00 37.77           C
ATOM     99  C   GLY    14    -100.651 -74.468  67.638  1.00 37.77           C
ATOM    100  O   GLY    14    -100.818 -74.705  66.442  1.00 37.77           O
ATOM    101  N   ARG    15     -99.735 -73.567  68.066  1.00 92.59           N
ATOM    102  CA  ARG    15     -99.006 -72.829  67.072  1.00 92.59           C
ATOM    103  CB  ARG    15     -99.656 -71.479  66.730  1.00 92.59           C
ATOM    104  CG  ARG    15    -101.009 -71.592  66.027  1.00 92.59           C
ATOM    105  CD  ARG    15    -101.528 -70.238  65.540  1.00 92.59           C
ATOM    106  NE  ARG    15    -102.828 -70.454  64.843  1.00 92.59           N
ATOM    107  CZ  ARG    15    -103.403 -69.426  64.152  1.00 92.59           C
ATOM    108  NH1 ARG    15    -102.781 -68.212  64.097  1.00 92.59           N
ATOM    109  NH2 ARG    15    -104.596 -69.611  63.515  1.00 92.59           N
ATOM    110  C   ARG    15     -97.604 -72.515  67.510  1.00 92.59           C
ATOM    111  O   ARG    15     -97.371 -71.876  68.537  1.00 92.59           O
ATOM    112  N   LYS    16     -96.625 -72.947  66.690  1.00109.42           N
ATOM    113  CA  LYS    16     -95.242 -72.627  66.879  1.00109.42           C
ATOM    114  CB  LYS    16     -94.362 -73.849  67.183  1.00109.42           C
ATOM    115  CG  LYS    16     -92.878 -73.502  67.304  1.00109.42           C
ATOM    116  CD  LYS    16     -92.564 -72.562  68.467  1.00109.42           C
ATOM    117  CE  LYS    16     -91.079 -72.218  68.595  1.00109.42           C
ATOM    118  NZ  LYS    16     -90.877 -71.289  69.729  1.00109.42           N
ATOM    119  C   LYS    16     -94.807 -72.088  65.559  1.00109.42           C
ATOM    120  O   LYS    16     -95.033 -72.723  64.529  1.00109.42           O
ATOM    121  N   LYS    17     -94.162 -70.904  65.549  1.00170.30           N
ATOM    122  CA  LYS    17     -93.802 -70.326  64.287  1.00170.30           C
ATOM    123  CB  LYS    17     -92.773 -71.135  63.471  1.00170.30           C
ATOM    124  CG  LYS    17     -91.322 -70.945  63.923  1.00170.30           C
ATOM    125  CD  LYS    17     -90.975 -71.601  65.260  1.00170.30           C
ATOM    126  CE  LYS    17     -89.518 -71.387  65.677  1.00170.30           C
ATOM    127  NZ  LYS    17     -88.608 -71.911  64.632  1.00170.30           N
ATOM    128  C   LYS    17     -95.053 -70.206  63.474  1.00170.30           C
ATOM    129  O   LYS    17     -96.085 -69.745  63.958  1.00170.30           O
ATOM    130  N   THR    18     -94.932 -70.543  62.176  1.00134.23           N
ATOM    131  CA  THR    18     -95.976 -70.543  61.188  1.00134.23           C
ATOM    132  CB  THR    18     -95.433 -70.561  59.790  1.00134.23           C
ATOM    133  OG1 THR    18     -94.688 -71.750  59.568  1.00134.23           O
ATOM    134  CG2 THR    18     -94.534 -69.328  59.596  1.00134.23           C
ATOM    135  C   THR    18     -96.900 -71.721  61.317  1.00134.23           C
ATOM    136  O   THR    18     -98.073 -71.630  60.960  1.00134.23           O
ATOM    137  N   ALA    19     -96.395 -72.876  61.794  1.00 43.01           N
ATOM    138  CA  ALA    19     -97.189 -74.077  61.799  1.00 43.01           C
ATOM    139  CB  ALA    19     -96.430 -75.319  62.304  1.00 43.01           C
ATOM    140  C   ALA    19     -98.400 -73.907  62.658  1.00 43.01           C
ATOM    141  O   ALA    19     -98.404 -73.132  63.612  1.00 43.01           O
ATOM    142  N   VAL    20     -99.496 -74.603  62.280  1.00101.28           N
ATOM    143  CA  VAL    20    -100.691 -74.602  63.076  1.00101.28           C
ATOM    144  CB  VAL    20    -101.777 -73.725  62.522  1.00101.28           C
ATOM    145  CG1 VAL    20    -101.283 -72.269  62.536  1.00101.28           C
ATOM    146  CG2 VAL    20    -102.157 -74.237  61.122  1.00101.28           C
ATOM    147  C   VAL    20    -101.219 -76.011  63.102  1.00101.28           C
ATOM    148  O   VAL    20    -101.297 -76.668  62.062  1.00101.28           O
ATOM    149  N   ALA    21    -101.601 -76.510  64.302  1.00 49.49           N
ATOM    150  CA  ALA    21    -102.105 -77.854  64.416  1.00 49.49           C
ATOM    151  CB  ALA    21    -101.219 -78.771  65.277  1.00 49.49           C
ATOM    152  C   ALA    21    -103.449 -77.801  65.077  1.00 49.49           C
ATOM    153  O   ALA    21    -103.588 -77.292  66.188  1.00 49.49           O
ATOM    154  N   VAL    22    -104.479 -78.380  64.428  1.00 41.63           N
ATOM    155  CA  VAL    22    -105.795 -78.305  64.999  1.00 41.63           C
ATOM    156  CB  VAL    22    -106.860 -77.971  63.994  1.00 41.63           C
ATOM    157  CG1 VAL    22    -108.229 -78.027  64.692  1.00 41.63           C
ATOM    158  CG2 VAL    22    -106.536 -76.606  63.364  1.00 41.63           C
ATOM    159  C   VAL    22    -106.144 -79.633  65.590  1.00 41.63           C
ATOM    160  O   VAL    22    -105.851 -80.679  65.010  1.00 41.63           O
ATOM    161  N   THR    23    -106.777 -79.617  66.785  1.00 45.33           N
ATOM    162  CA  THR    23    -107.160 -80.850  67.415  1.00 45.33           C
ATOM    163  CB  THR    23    -106.590 -81.062  68.788  1.00 45.33           C
ATOM    164  OG1 THR    23    -105.173 -81.111  68.734  1.00 45.33           O
ATOM    165  CG2 THR    23    -107.143 -82.386  69.345  1.00 45.33           C
ATOM    166  C   THR    23    -108.647 -80.912  67.551  1.00 45.33           C
ATOM    167  O   THR    23    -109.310 -79.924  67.867  1.00 45.33           O
ATOM    168  N   HIS    24    -109.201 -82.110  67.280  1.00 65.02           N
ATOM    169  CA  HIS    24    -110.597 -82.386  67.441  1.00 65.02           C
ATOM    170  ND1 HIS    24    -110.013 -81.936  64.247  1.00 65.02           N
ATOM    171  CG  HIS    24    -111.152 -82.119  64.999  1.00 65.02           C
ATOM    172  CB  HIS    24    -111.228 -83.023  66.193  1.00 65.02           C
ATOM    173  NE2 HIS    24    -111.582 -80.639  63.351  1.00 65.02           N
ATOM    174  CD2 HIS    24    -112.101 -81.321  64.437  1.00 65.02           C
ATOM    175  CE1 HIS    24    -110.326 -81.041  63.276  1.00 65.02           C
ATOM    176  C   HIS    24    -110.659 -83.391  68.548  1.00 65.02           C
ATOM    177  O   HIS    24    -110.168 -84.512  68.404  1.00 65.02           O
ATOM    178  N   CYS    25    -111.254 -83.001  69.694  1.00 90.18           N
ATOM    179  CA  CYS    25    -111.289 -83.864  70.841  1.00 90.18           C
ATOM    180  CB  CYS    25    -110.691 -83.185  72.088  1.00 90.18           C
ATOM    181  SG  CYS    25    -110.722 -84.233  73.570  1.00 90.18           S
ATOM    182  C   CYS    25    -112.721 -84.172  71.151  1.00 90.18           C
ATOM    183  O   CYS    25    -113.430 -83.344  71.722  1.00 90.18           O
ATOM    184  N   LYS    26    -113.171 -85.400  70.817  1.00 81.57           N
ATOM    185  CA  LYS    26    -114.544 -85.769  71.028  1.00 81.57           C
ATOM    186  CB  LYS    26    -115.281 -86.143  69.735  1.00 81.57           C
ATOM    187  CG  LYS    26    -114.656 -87.345  69.024  1.00 81.57           C
ATOM    188  CD  LYS    26    -115.583 -88.000  67.999  1.00 81.57           C
ATOM    189  CE  LYS    26    -114.956 -89.201  67.288  1.00 81.57           C
ATOM    190  NZ  LYS    26    -115.979 -89.907  66.483  1.00 81.57           N
ATOM    191  C   LYS    26    -114.586 -86.986  71.894  1.00 81.57           C
ATOM    192  O   LYS    26    -113.553 -87.567  72.209  1.00 81.57           O
ATOM    193  N   ARG    27    -115.796 -87.402  72.325  1.00146.86           N
ATOM    194  CA  ARG    27    -115.876 -88.572  73.156  1.00146.86           C
ATOM    195  CB  ARG    27    -117.248 -88.770  73.822  1.00146.86           C
ATOM    196  CG  ARG    27    -117.300 -90.001  74.728  1.00146.86           C
ATOM    197  CD  ARG    27    -118.625 -90.159  75.476  1.00146.86           C
ATOM    198  NE  ARG    27    -118.522 -91.391  76.307  1.00146.86           N
ATOM    199  CZ  ARG    27    -117.938 -91.336  77.538  1.00146.86           C
ATOM    200  NH1 ARG    27    -117.448 -90.153  78.010  1.00146.86           N
ATOM    201  NH2 ARG    27    -117.839 -92.465  78.298  1.00146.86           N
ATOM    202  C   ARG    27    -115.594 -89.764  72.296  1.00146.86           C
ATOM    203  O   ARG    27    -116.133 -89.883  71.196  1.00146.86           O
ATOM    204  N   GLY    28    -114.747 -90.695  72.791  1.00 31.69           N
ATOM    205  CA  GLY    28    -114.386 -91.827  71.981  1.00 31.69           C
ATOM    206  C   GLY    28    -113.707 -92.903  72.788  1.00 31.69           C
ATOM    207  O   GLY    28    -113.601 -92.836  74.013  1.00 31.69           O
ATOM    208  N   SER    29    -113.246 -93.943  72.051  1.00 91.99           N
ATOM    209  CA  SER    29    -112.602 -95.148  72.507  1.00 91.99           C
ATOM    210  CB  SER    29    -112.555 -96.235  71.420  1.00 91.99           C
ATOM    211  OG  SER    29    -111.908 -97.397  71.919  1.00 91.99           O
ATOM    212  C   SER    29    -111.184 -94.911  72.946  1.00 91.99           C
ATOM    213  O   SER    29    -110.565 -95.823  73.494  1.00 91.99           O
ATOM    214  N   GLY    30    -110.617 -93.705  72.734  1.00 53.52           N
ATOM    215  CA  GLY    30    -109.270 -93.483  73.193  1.00 53.52           C
ATOM    216  C   GLY    30    -108.234 -93.459  72.095  1.00 53.52           C
ATOM    217  O   GLY    30    -107.092 -93.864  72.312  1.00 53.52           O
ATOM    218  N   LEU    31    -108.584 -93.014  70.871  1.00133.15           N
ATOM    219  CA  LEU    31    -107.581 -92.921  69.838  1.00133.15           C
ATOM    220  CB  LEU    31    -108.147 -92.920  68.406  1.00133.15           C
ATOM    221  CG  LEU    31    -108.934 -94.187  68.045  1.00133.15           C
ATOM    222  CD1 LEU    31    -110.183 -94.305  68.924  1.00133.15           C
ATOM    223  CD2 LEU    31    -109.254 -94.245  66.542  1.00133.15           C
ATOM    224  C   LEU    31    -106.831 -91.626  69.975  1.00133.15           C
ATOM    225  O   LEU    31    -107.362 -90.640  70.485  1.00133.15           O
ATOM    226  N   ILE    32    -105.540 -91.627  69.571  1.00137.88           N
ATOM    227  CA  ILE    32    -104.764 -90.421  69.474  1.00137.88           C
ATOM    228  CB  ILE    32    -103.694 -90.329  70.519  1.00137.88           C
ATOM    229  CG1 ILE    32    -104.311 -90.324  71.925  1.00137.88           C
ATOM    230  CG2 ILE    32    -102.869 -89.067  70.227  1.00137.88           C
ATOM    231  CD1 ILE    32    -105.173 -89.094  72.197  1.00137.88           C
ATOM    232  C   ILE    32    -104.065 -90.489  68.147  1.00137.88           C
ATOM    233  O   ILE    32    -103.077 -91.207  67.997  1.00137.88           O
ATOM    234  N   LYS    33    -104.527 -89.719  67.144  1.00 81.30           N
ATOM    235  CA  LYS    33    -103.896 -89.830  65.852  1.00 81.30           C
ATOM    236  CB  LYS    33    -104.803 -90.484  64.798  1.00 81.30           C
ATOM    237  CG  LYS    33    -105.137 -91.939  65.133  1.00 81.30           C
ATOM    238  CD  LYS    33    -106.303 -92.505  64.323  1.00 81.30           C
ATOM    239  CE  LYS    33    -105.905 -93.005  62.934  1.00 81.30           C
ATOM    240  NZ  LYS    33    -107.098 -93.530  62.233  1.00 81.30           N
ATOM    241  C   LYS    33    -103.514 -88.465  65.352  1.00 81.30           C
ATOM    242  O   LYS    33    -104.160 -87.468  65.663  1.00 81.30           O
ATOM    243  N   LEU    34    -102.420 -88.402  64.563  1.00133.62           N
ATOM    244  CA  LEU    34    -101.897 -87.196  63.983  1.00133.62           C
ATOM    245  CB  LEU    34    -100.417 -86.947  64.348  1.00133.62           C
ATOM    246  CG  LEU    34     -99.713 -85.782  63.609  1.00133.62           C
ATOM    247  CD1 LEU    34     -99.304 -86.160  62.175  1.00133.62           C
ATOM    248  CD2 LEU    34    -100.553 -84.498  63.647  1.00133.62           C
ATOM    249  C   LEU    34    -101.997 -87.286  62.498  1.00133.62           C
ATOM    250  O   LEU    34    -101.457 -88.189  61.863  1.00133.62           O
ATOM    251  N   ASN    35    -102.664 -86.293  61.897  1.00140.93           N
ATOM    252  CA  ASN    35    -102.884 -86.306  60.499  1.00140.93           C
ATOM    253  CB  ASN    35    -101.580 -86.273  59.683  1.00140.93           C
ATOM    254  CG  ASN    35    -100.940 -84.914  59.959  1.00140.93           C
ATOM    255  OD1 ASN    35    -101.530 -84.065  60.625  1.00140.93           O
ATOM    256  ND2 ASN    35     -99.705 -84.694  59.434  1.00140.93           N
ATOM    257  C   ASN    35    -103.638 -87.570  60.272  1.00140.93           C
ATOM    258  O   ASN    35    -104.810 -87.674  60.622  1.00140.93           O
ATOM    259  N   GLY    36    -103.028 -88.489  59.517  1.00 95.46           N
ATOM    260  CA  GLY    36    -103.513 -89.814  59.258  1.00 95.46           C
ATOM    261  C   GLY    36    -103.180 -90.890  60.265  1.00 95.46           C
ATOM    262  O   GLY    36    -103.942 -91.846  60.404  1.00 95.46           O
ATOM    263  N   CYS    37    -102.005 -90.813  60.935  1.00103.01           N
ATOM    264  CA  CYS    37    -101.494 -91.965  61.646  1.00103.01           C
ATOM    265  CB  CYS    37    -100.045 -92.298  61.251  1.00103.01           C
ATOM    266  SG  CYS    37     -98.873 -91.007  61.764  1.00103.01           S
ATOM    267  C   CYS    37    -101.512 -91.812  63.135  1.00103.01           C
ATOM    268  O   CYS    37    -101.925 -90.797  63.680  1.00103.01           O
ATOM    269  N   PRO    38    -101.065 -92.849  63.808  1.00166.76           N
ATOM    270  CA  PRO    38    -101.040 -92.838  65.246  1.00166.76           C
ATOM    271  CD  PRO    38    -101.237 -94.196  63.284  1.00166.76           C
ATOM    272  CB  PRO    38    -100.823 -94.286  65.674  1.00166.76           C
ATOM    273  CG  PRO    38    -101.408 -95.102  64.512  1.00166.76           C
ATOM    274  C   PRO    38    -100.000 -91.912  65.798  1.00166.76           C
ATOM    275  O   PRO    38     -99.042 -91.588  65.100  1.00166.76           O
ATOM    276  N   ILE    39    -100.179 -91.510  67.071  1.00 80.47           N
ATOM    277  CA  ILE    39     -99.328 -90.623  67.808  1.00 80.47           C
ATOM    278  CB  ILE    39     -99.835 -90.324  69.192  1.00 80.47           C
ATOM    279  CG1 ILE    39     -98.974 -89.230  69.847  1.00 80.47           C
ATOM    280  CG2 ILE    39     -99.911 -91.637  69.988  1.00 80.47           C
ATOM    281  CD1 ILE    39     -99.564 -88.677  71.143  1.00 80.47           C
ATOM    282  C   ILE    39     -97.980 -91.256  67.929  1.00 80.47           C
ATOM    283  O   ILE    39     -97.001 -90.592  68.265  1.00 80.47           O
ATOM    284  N   GLU    40     -97.941 -92.593  67.796  1.00106.49           N
ATOM    285  CA  GLU    40     -96.739 -93.373  67.891  1.00106.49           C
ATOM    286  CB  GLU    40     -97.009 -94.886  67.835  1.00106.49           C
ATOM    287  CG  GLU    40     -95.737 -95.732  67.940  1.00106.49           C
ATOM    288  CD  GLU    40     -96.121 -97.193  67.754  1.00106.49           C
ATOM    289  OE1 GLU    40     -97.158 -97.452  67.086  1.00106.49           O
ATOM    290  OE2 GLU    40     -95.379 -98.070  68.271  1.00106.49           O
ATOM    291  C   GLU    40     -95.761 -93.082  66.776  1.00106.49           C
ATOM    292  O   GLU    40     -94.557 -93.178  67.004  1.00106.49           O
ATOM    293  N   LEU    41     -96.218 -92.816  65.530  1.00 91.13           N
ATOM    294  CA  LEU    41     -95.287 -92.650  64.433  1.00 91.13           C
ATOM    295  CB  LEU    41     -96.017 -92.617  63.083  1.00 91.13           C
ATOM    296  CG  LEU    41     -96.817 -93.908  62.826  1.00 91.13           C
ATOM    297  CD1 LEU    41     -97.543 -93.866  61.473  1.00 91.13           C
ATOM    298  CD2 LEU    41     -95.934 -95.153  63.001  1.00 91.13           C
ATOM    299  C   LEU    41     -94.442 -91.402  64.546  1.00 91.13           C
ATOM    300  O   LEU    41     -93.230 -91.488  64.734  1.00 91.13           O
ATOM    301  N   PHE    42     -95.066 -90.205  64.456  1.00205.56           N
ATOM    302  CA  PHE    42     -94.384 -88.955  64.714  1.00205.56           C
ATOM    303  CB  PHE    42     -94.011 -88.818  66.205  1.00205.56           C
ATOM    304  CG  PHE    42     -93.311 -87.524  66.439  1.00205.56           C
ATOM    305  CD1 PHE    42     -94.018 -86.343  66.477  1.00205.56           C
ATOM    306  CD2 PHE    42     -91.951 -87.493  66.652  1.00205.56           C
ATOM    307  CE1 PHE    42     -93.373 -85.151  66.701  1.00205.56           C
ATOM    308  CE2 PHE    42     -91.300 -86.303  66.875  1.00205.56           C
ATOM    309  CZ  PHE    42     -92.013 -85.130  66.900  1.00205.56           C
ATOM    310  C   PHE    42     -93.145 -88.724  63.869  1.00205.56           C
ATOM    311  O   PHE    42     -93.207 -88.050  62.840  1.00205.56           O
ATOM    312  N   GLN    43     -91.966 -89.165  64.380  1.00125.46           N
ATOM    313  CA  GLN    43     -90.665 -89.123  63.740  1.00125.46           C
ATOM    314  CB  GLN    43     -90.370 -90.358  62.867  1.00125.46           C
ATOM    315  CG  GLN    43     -88.932 -90.397  62.350  1.00125.46           C
ATOM    316  CD  GLN    43     -88.687 -91.764  61.729  1.00125.46           C
ATOM    317  OE1 GLN    43     -89.542 -92.647  61.783  1.00125.46           O
ATOM    318  NE2 GLN    43     -87.481 -91.948  61.127  1.00125.46           N
ATOM    319  C   GLN    43     -90.487 -87.869  62.938  1.00125.46           C
ATOM    320  O   GLN    43     -90.748 -87.874  61.733  1.00125.46           O
ATOM    321  N   PRO    44     -90.083 -86.781  63.551  1.00194.93           N
ATOM    322  CA  PRO    44     -88.754 -86.535  64.068  1.00194.93           C
ATOM    323  CD  PRO    44     -90.900 -85.581  63.528  1.00194.93           C
ATOM    324  CB  PRO    44     -88.821 -85.156  64.716  1.00194.93           C
ATOM    325  CG  PRO    44     -89.960 -84.447  63.958  1.00194.93           C
ATOM    326  C   PRO    44     -88.174 -87.598  64.957  1.00194.93           C
ATOM    327  O   PRO    44     -86.965 -87.812  64.902  1.00194.93           O
ATOM    328  N   GLU    45     -88.988 -88.214  65.825  1.00 96.76           N
ATOM    329  CA  GLU    45     -88.644 -89.372  66.609  1.00 96.76           C
ATOM    330  CB  GLU    45     -87.984 -90.456  65.741  1.00 96.76           C
ATOM    331  CG  GLU    45     -87.629 -91.736  66.497  1.00 96.76           C
ATOM    332  CD  GLU    45     -86.996 -92.699  65.504  1.00 96.76           C
ATOM    333  OE1 GLU    45     -86.639 -92.246  64.383  1.00 96.76           O
ATOM    334  OE2 GLU    45     -86.856 -93.901  65.854  1.00 96.76           O
ATOM    335  C   GLU    45     -87.714 -89.077  67.748  1.00 96.76           C
ATOM    336  O   GLU    45     -87.851 -89.685  68.809  1.00 96.76           O
ATOM    337  N   ILE    46     -86.773 -88.125  67.607  1.00118.13           N
ATOM    338  CA  ILE    46     -85.963 -87.807  68.749  1.00118.13           C
ATOM    339  CB  ILE    46     -84.844 -86.873  68.409  1.00118.13           C
ATOM    340  CG1 ILE    46     -83.985 -87.478  67.290  1.00118.13           C
ATOM    341  CG2 ILE    46     -84.058 -86.578  69.698  1.00118.13           C
ATOM    342  CD1 ILE    46     -83.407 -88.846  67.644  1.00118.13           C
ATOM    343  C   ILE    46     -86.900 -87.071  69.640  1.00118.13           C
ATOM    344  O   ILE    46     -87.008 -87.295  70.844  1.00118.13           O
ATOM    345  N   LEU    47     -87.635 -86.176  68.968  1.00124.52           N
ATOM    346  CA  LEU    47     -88.623 -85.267  69.456  1.00124.52           C
ATOM    347  CB  LEU    47     -89.099 -84.265  68.390  1.00124.52           C
ATOM    348  CG  LEU    47     -88.059 -83.193  68.017  1.00124.52           C
ATOM    349  CD1 LEU    47     -87.838 -82.212  69.180  1.00124.52           C
ATOM    350  CD2 LEU    47     -86.754 -83.827  67.511  1.00124.52           C
ATOM    351  C   LEU    47     -89.834 -86.010  69.918  1.00124.52           C
ATOM    352  O   LEU    47     -90.679 -85.439  70.602  1.00124.52           O
ATOM    353  N   ARG    48     -89.956 -87.298  69.551  1.00142.81           N
ATOM    354  CA  ARG    48     -91.175 -88.042  69.727  1.00142.81           C
ATOM    355  CB  ARG    48     -91.000 -89.531  69.385  1.00142.81           C
ATOM    356  CG  ARG    48     -92.312 -90.314  69.371  1.00142.81           C
ATOM    357  CD  ARG    48     -92.158 -91.758  68.890  1.00142.81           C
ATOM    358  NE  ARG    48     -91.818 -91.701  67.442  1.00142.81           N
ATOM    359  CZ  ARG    48     -90.946 -92.601  66.903  1.00142.81           C
ATOM    360  NH1 ARG    48     -90.372 -93.555  67.691  1.00142.81           N
ATOM    361  NH2 ARG    48     -90.644 -92.540  65.573  1.00142.81           N
ATOM    362  C   ARG    48     -91.704 -87.927  71.129  1.00142.81           C
ATOM    363  O   ARG    48     -92.907 -87.760  71.323  1.00142.81           O
ATOM    364  N   PHE    49     -90.842 -87.962  72.153  1.00 65.59           N
ATOM    365  CA  PHE    49     -91.341 -87.904  73.499  1.00 65.59           C
ATOM    366  CB  PHE    49     -90.239 -88.074  74.557  1.00 65.59           C
ATOM    367  CG  PHE    49     -89.804 -89.496  74.439  1.00 65.59           C
ATOM    368  CD1 PHE    49     -90.527 -90.499  75.046  1.00 65.59           C
ATOM    369  CD2 PHE    49     -88.681 -89.830  73.716  1.00 65.59           C
ATOM    370  CE1 PHE    49     -90.133 -91.812  74.935  1.00 65.59           C
ATOM    371  CE2 PHE    49     -88.284 -91.142  73.603  1.00 65.59           C
ATOM    372  CZ  PHE    49     -89.009 -92.136  74.214  1.00 65.59           C
ATOM    373  C   PHE    49     -92.072 -86.612  73.713  1.00 65.59           C
ATOM    374  O   PHE    49     -93.025 -86.564  74.488  1.00 65.59           O
ATOM    375  N   LYS    50     -91.660 -85.528  73.032  1.00156.31           N
ATOM    376  CA  LYS    50     -92.304 -84.260  73.241  1.00156.31           C
ATOM    377  CB  LYS    50     -91.729 -83.115  72.399  1.00156.31           C
ATOM    378  CG  LYS    50     -90.549 -82.457  73.101  1.00156.31           C
ATOM    379  CD  LYS    50     -89.913 -81.314  72.326  1.00156.31           C
ATOM    380  CE  LYS    50     -89.253 -80.309  73.262  1.00156.31           C
ATOM    381  NZ  LYS    50     -90.265 -79.838  74.237  1.00156.31           N
ATOM    382  C   LYS    50     -93.778 -84.333  72.964  1.00156.31           C
ATOM    383  O   LYS    50     -94.558 -83.600  73.574  1.00156.31           O
ATOM    384  N   ILE    51     -94.203 -85.136  71.976  1.00120.30           N
ATOM    385  CA  ILE    51     -95.611 -85.283  71.717  1.00120.30           C
ATOM    386  CB  ILE    51     -95.926 -85.926  70.394  1.00120.30           C
ATOM    387  CG1 ILE    51     -95.440 -87.381  70.355  1.00120.30           C
ATOM    388  CG2 ILE    51     -95.325 -85.043  69.287  1.00120.30           C
ATOM    389  CD1 ILE    51     -95.981 -88.171  69.165  1.00120.30           C
ATOM    390  C   ILE    51     -96.247 -86.117  72.787  1.00120.30           C
ATOM    391  O   ILE    51     -97.396 -85.897  73.165  1.00120.30           O
ATOM    392  N   PHE    52     -95.525 -87.151  73.258  1.00 84.45           N
ATOM    393  CA  PHE    52     -96.021 -88.023  74.285  1.00 84.45           C
ATOM    394  CB  PHE    52     -95.088 -89.190  74.656  1.00 84.45           C
ATOM    395  CG  PHE    52     -94.971 -90.141  73.517  1.00 84.45           C
ATOM    396  CD1 PHE    52     -96.050 -90.890  73.108  1.00 84.45           C
ATOM    397  CD2 PHE    52     -93.763 -90.314  72.886  1.00 84.45           C
ATOM    398  CE1 PHE    52     -95.932 -91.777  72.063  1.00 84.45           C
ATOM    399  CE2 PHE    52     -93.642 -91.201  71.844  1.00 84.45           C
ATOM    400  CZ  PHE    52     -94.726 -91.933  71.425  1.00 84.45           C
ATOM    401  C   PHE    52     -96.160 -87.239  75.547  1.00 84.45           C
ATOM    402  O   PHE    52     -97.077 -87.491  76.326  1.00 84.45           O
ATOM    403  N   GLU    53     -95.289 -86.227  75.738  1.00118.76           N
ATOM    404  CA  GLU    53     -95.111 -85.567  77.002  1.00118.76           C
ATOM    405  CB  GLU    53     -94.251 -84.286  76.914  1.00118.76           C
ATOM    406  CG  GLU    53     -92.762 -84.556  76.660  1.00118.76           C
ATOM    407  CD  GLU    53     -92.012 -83.229  76.592  1.00118.76           C
ATOM    408  OE1 GLU    53     -92.477 -82.320  75.856  1.00118.76           O
ATOM    409  OE2 GLU    53     -90.952 -83.113  77.264  1.00118.76           O
ATOM    410  C   GLU    53     -96.411 -85.207  77.656  1.00118.76           C
ATOM    411  O   GLU    53     -96.547 -85.560  78.825  1.00118.76           O
ATOM    412  N   PRO    54     -97.388 -84.573  77.063  1.00 92.12           N
ATOM    413  CA  PRO    54     -98.604 -84.275  77.768  1.00 92.12           C
ATOM    414  CD  PRO    54     -97.510 -84.375  75.627  1.00 92.12           C
ATOM    415  CB  PRO    54     -99.511 -83.590  76.744  1.00 92.12           C
ATOM    416  CG  PRO    54     -99.010 -84.130  75.392  1.00 92.12           C
ATOM    417  C   PRO    54     -99.246 -85.482  78.400  1.00 92.12           C
ATOM    418  O   PRO    54     -99.621 -85.394  79.566  1.00 92.12           O
ATOM    419  N   VAL    55     -99.334 -86.625  77.694  1.00 58.06           N
ATOM    420  CA  VAL    55    -100.028 -87.783  78.193  1.00 58.06           C
ATOM    421  CB  VAL    55    -100.027 -88.925  77.220  1.00 58.06           C
ATOM    422  CG1 VAL    55    -100.709 -90.134  77.884  1.00 58.06           C
ATOM    423  CG2 VAL    55    -100.707 -88.461  75.920  1.00 58.06           C
ATOM    424  C   VAL    55     -99.395 -88.280  79.459  1.00 58.06           C
ATOM    425  O   VAL    55    -100.074 -88.685  80.400  1.00 58.06           O
ATOM    426  N   LEU    56     -98.062 -88.296  79.503  1.00113.80           N
ATOM    427  CA  LEU    56     -97.329 -88.804  80.624  1.00113.80           C
ATOM    428  CB  LEU    56     -95.830 -88.888  80.315  1.00113.80           C
ATOM    429  CG  LEU    56     -95.500 -89.904  79.206  1.00113.80           C
ATOM    430  CD1 LEU    56     -96.156 -89.567  77.860  1.00113.80           C
ATOM    431  CD2 LEU    56     -93.987 -90.045  79.057  1.00113.80           C
ATOM    432  C   LEU    56     -97.502 -87.916  81.816  1.00113.80           C
ATOM    433  O   LEU    56     -97.629 -88.391  82.944  1.00113.80           O
ATOM    434  N   LEU    57     -97.489 -86.590  81.602  1.00123.49           N
ATOM    435  CA  LEU    57     -97.594 -85.696  82.714  1.00123.49           C
ATOM    436  CB  LEU    57     -97.426 -84.212  82.338  1.00123.49           C
ATOM    437  CG  LEU    57     -95.962 -83.770  82.139  1.00123.49           C
ATOM    438  CD1 LEU    57     -95.264 -84.563  81.032  1.00123.49           C
ATOM    439  CD2 LEU    57     -95.872 -82.256  81.914  1.00123.49           C
ATOM    440  C   LEU    57     -98.918 -85.853  83.393  1.00123.49           C
ATOM    441  O   LEU    57     -98.981 -85.789  84.619  1.00123.49           O
ATOM    442  N   LEU    58    -100.013 -85.958  82.610  1.00197.04           N
ATOM    443  CA  LEU    58    -101.353 -86.089  83.126  1.00197.04           C
ATOM    444  CB  LEU    58    -102.477 -85.442  82.287  1.00197.04           C
ATOM    445  CG  LEU    58    -103.041 -86.275  81.125  1.00197.04           C
ATOM    446  CD1 LEU    58    -104.153 -85.501  80.410  1.00197.04           C
ATOM    447  CD2 LEU    58    -101.952 -86.711  80.148  1.00197.04           C
ATOM    448  C   LEU    58    -101.767 -87.485  83.476  1.00197.04           C
ATOM    449  O   LEU    58    -102.771 -87.673  84.156  1.00197.04           O
ATOM    450  N   GLY    59    -101.103 -88.515  82.933  1.00 41.12           N
ATOM    451  CA  GLY    59    -101.534 -89.853  83.228  1.00 41.12           C
ATOM    452  C   GLY    59    -102.188 -90.355  81.981  1.00 41.12           C
ATOM    453  O   GLY    59    -103.033 -89.690  81.386  1.00 41.12           O
ATOM    454  N   LYS    60    -101.831 -91.588  81.595  1.00 96.94           N
ATOM    455  CA  LYS    60    -102.223 -92.204  80.363  1.00 96.94           C
ATOM    456  CB  LYS    60    -101.549 -93.574  80.170  1.00 96.94           C
ATOM    457  CG  LYS    60    -101.825 -94.221  78.812  1.00 96.94           C
ATOM    458  CD  LYS    60    -100.870 -95.372  78.485  1.00 96.94           C
ATOM    459  CE  LYS    60    -101.174 -96.665  79.246  1.00 96.94           C
ATOM    460  NZ  LYS    60    -102.235 -97.425  78.548  1.00 96.94           N
ATOM    461  C   LYS    60    -103.708 -92.412  80.280  1.00 96.94           C
ATOM    462  O   LYS    60    -104.272 -92.361  79.189  1.00 96.94           O
ATOM    463  N   HIS    61    -104.381 -92.651  81.422  1.00158.95           N
ATOM    464  CA  HIS    61    -105.768 -93.045  81.459  1.00158.95           C
ATOM    465  ND1 HIS    61    -107.137 -91.174  83.901  1.00158.95           N
ATOM    466  CG  HIS    61    -106.160 -92.139  83.792  1.00158.95           C
ATOM    467  CB  HIS    61    -106.253 -93.334  82.891  1.00158.95           C
ATOM    468  NE2 HIS    61    -105.497 -90.578  85.280  1.00158.95           N
ATOM    469  CD2 HIS    61    -105.166 -91.760  84.640  1.00158.95           C
ATOM    470  CE1 HIS    61    -106.688 -90.265  84.804  1.00158.95           C
ATOM    471  C   HIS    61    -106.723 -92.038  80.867  1.00158.95           C
ATOM    472  O   HIS    61    -107.571 -92.392  80.058  1.00158.95           O
ATOM    473  N   ARG    62    -106.529 -90.743  81.128  1.00213.71           N
ATOM    474  CA  ARG    62    -107.448 -89.660  80.890  1.00213.71           C
ATOM    475  CB  ARG    62    -106.751 -88.304  81.086  1.00213.71           C
ATOM    476  CG  ARG    62    -107.651 -87.092  80.858  1.00213.71           C
ATOM    477  CD  ARG    62    -106.977 -85.766  81.212  1.00213.71           C
ATOM    478  NE  ARG    62    -106.538 -85.862  82.633  1.00213.71           N
ATOM    479  CZ  ARG    62    -107.389 -85.512  83.642  1.00213.71           C
ATOM    480  NH1 ARG    62    -108.636 -85.042  83.351  1.00213.71           N
ATOM    481  NH2 ARG    62    -106.991 -85.632  84.942  1.00213.71           N
ATOM    482  C   ARG    62    -108.019 -89.669  79.499  1.00213.71           C
ATOM    483  O   ARG    62    -109.059 -89.056  79.264  1.00213.71           O
ATOM    484  N   PHE    63    -107.310 -90.275  78.538  1.00122.27           N
ATOM    485  CA  PHE    63    -107.656 -90.393  77.142  1.00122.27           C
ATOM    486  CB  PHE    63    -106.452 -90.807  76.286  1.00122.27           C
ATOM    487  CG  PHE    63    -105.498 -89.667  76.358  1.00122.27           C
ATOM    488  CD1 PHE    63    -104.674 -89.518  77.448  1.00122.27           C
ATOM    489  CD2 PHE    63    -105.430 -88.749  75.338  1.00122.27           C
ATOM    490  CE1 PHE    63    -103.793 -88.465  77.518  1.00122.27           C
ATOM    491  CE2 PHE    63    -104.551 -87.694  75.400  1.00122.27           C
ATOM    492  CZ  PHE    63    -103.729 -87.552  76.492  1.00122.27           C
ATOM    493  C   PHE    63    -108.770 -91.372  76.862  1.00122.27           C
ATOM    494  O   PHE    63    -109.324 -91.361  75.766  1.00122.27           O
ATOM    495  N   ALA    64    -109.083 -92.294  77.792  1.00 59.48           N
ATOM    496  CA  ALA    64    -110.001 -93.386  77.554  1.00 59.48           C
ATOM    497  CB  ALA    64    -110.167 -94.290  78.788  1.00 59.48           C
ATOM    498  C   ALA    64    -111.382 -92.948  77.140  1.00 59.48           C
ATOM    499  O   ALA    64    -112.022 -93.627  76.340  1.00 59.48           O
ATOM    500  N   GLY    65    -111.913 -91.861  77.722  1.00 59.37           N
ATOM    501  CA  GLY    65    -113.215 -91.323  77.424  1.00 59.37           C
ATOM    502  C   GLY    65    -113.263 -90.686  76.060  1.00 59.37           C
ATOM    503  O   GLY    65    -114.345 -90.457  75.519  1.00 59.37           O
ATOM    504  N   VAL    66    -112.099 -90.292  75.508  1.00 72.76           N
ATOM    505  CA  VAL    66    -112.083 -89.456  74.338  1.00 72.76           C
ATOM    506  CB  VAL    66    -111.550 -88.099  74.727  1.00 72.76           C
ATOM    507  CG1 VAL    66    -111.168 -87.267  73.495  1.00 72.76           C
ATOM    508  CG2 VAL    66    -112.605 -87.429  75.623  1.00 72.76           C
ATOM    509  C   VAL    66    -111.235 -89.967  73.200  1.00 72.76           C
ATOM    510  O   VAL    66    -110.258 -90.688  73.390  1.00 72.76           O
ATOM    511  N   ASN    67    -111.633 -89.578  71.960  1.00 76.78           N
ATOM    512  CA  ASN    67    -110.893 -89.816  70.747  1.00 76.78           C
ATOM    513  CB  ASN    67    -111.760 -90.172  69.522  1.00 76.78           C
ATOM    514  CG  ASN    67    -112.239 -91.607  69.645  1.00 76.78           C
ATOM    515  OD1 ASN    67    -113.169 -92.030  68.962  1.00 76.78           O
ATOM    516  ND2 ASN    67    -111.575 -92.382  70.538  1.00 76.78           N
ATOM    517  C   ASN    67    -110.233 -88.509  70.402  1.00 76.78           C
ATOM    518  O   ASN    67    -110.831 -87.446  70.581  1.00 76.78           O
ATOM    519  N   MET    68    -108.969 -88.547  69.916  1.00 89.31           N
ATOM    520  CA  MET    68    -108.302 -87.316  69.578  1.00 89.31           C
ATOM    521  CB  MET    68    -107.187 -86.910  70.559  1.00 89.31           C
ATOM    522  CG  MET    68    -107.706 -86.504  71.939  1.00 89.31           C
ATOM    523  SD  MET    68    -106.429 -85.873  73.066  1.00 89.31           S
ATOM    524  CE  MET    68    -106.178 -84.328  72.144  1.00 89.31           C
ATOM    525  C   MET    68    -107.676 -87.368  68.210  1.00 89.31           C
ATOM    526  O   MET    68    -106.976 -88.316  67.850  1.00 89.31           O
ATOM    527  N   ARG    69    -107.911 -86.310  67.402  1.00186.94           N
ATOM    528  CA  ARG    69    -107.298 -86.257  66.099  1.00186.94           C
ATOM    529  CB  ARG    69    -108.274 -86.416  64.922  1.00186.94           C
ATOM    530  CG  ARG    69    -107.548 -86.339  63.577  1.00186.94           C
ATOM    531  CD  ARG    69    -108.460 -86.268  62.355  1.00186.94           C
ATOM    532  NE  ARG    69    -108.688 -84.834  62.023  1.00186.94           N
ATOM    533  CZ  ARG    69    -109.342 -84.514  60.868  1.00186.94           C
ATOM    534  NH1 ARG    69    -109.788 -85.506  60.042  1.00186.94           N
ATOM    535  NH2 ARG    69    -109.554 -83.208  60.537  1.00186.94           N
ATOM    536  C   ARG    69    -106.683 -84.905  65.921  1.00186.94           C
ATOM    537  O   ARG    69    -107.248 -83.895  66.334  1.00186.94           O
ATOM    538  N   ILE    70    -105.495 -84.846  65.290  1.00119.39           N
ATOM    539  CA  ILE    70    -104.849 -83.580  65.098  1.00119.39           C
ATOM    540  CB  ILE    70    -103.680 -83.380  66.020  1.00119.39           C
ATOM    541  CG1 ILE    70    -102.598 -84.438  65.766  1.00119.39           C
ATOM    542  CG2 ILE    70    -104.210 -83.392  67.462  1.00119.39           C
ATOM    543  CD1 ILE    70    -101.281 -84.142  66.483  1.00119.39           C
ATOM    544  C   ILE    70    -104.364 -83.480  63.693  1.00119.39           C
ATOM    545  O   ILE    70    -104.014 -84.485  63.094  1.00119.39           O
ATOM    546  N   ARG    71    -104.369 -82.273  63.095  1.00126.06           N
ATOM    547  CA  ARG    71    -103.839 -82.152  61.764  1.00126.06           C
ATOM    548  CB  ARG    71    -104.938 -82.124  60.688  1.00126.06           C
ATOM    549  CG  ARG    71    -105.967 -81.016  60.908  1.00126.06           C
ATOM    550  CD  ARG    71    -107.202 -81.136  60.014  1.00126.06           C
ATOM    551  NE  ARG    71    -108.132 -80.039  60.406  1.00126.06           N
ATOM    552  CZ  ARG    71    -109.322 -79.883  59.757  1.00126.06           C
ATOM    553  NH1 ARG    71    -109.656 -80.722  58.733  1.00126.06           N
ATOM    554  NH2 ARG    71    -110.180 -78.892  60.139  1.00126.06           N
ATOM    555  C   ARG    71    -103.047 -80.885  61.700  1.00126.06           C
ATOM    556  O   ARG    71    -103.556 -79.806  61.997  1.00126.06           O
ATOM    557  N   VAL    72    -101.768 -80.989  61.286  1.00123.34           N
ATOM    558  CA  VAL    72    -100.916 -79.837  61.276  1.00123.34           C
ATOM    559  CB  VAL    72     -99.671 -80.046  62.079  1.00123.34           C
ATOM    560  CG1 VAL    72     -98.822 -81.109  61.375  1.00123.34           C
ATOM    561  CG2 VAL    72     -98.959 -78.703  62.252  1.00123.34           C
ATOM    562  C   VAL    72    -100.499 -79.514  59.878  1.00123.34           C
ATOM    563  O   VAL    72    -100.169 -80.389  59.078  1.00123.34           O
ATOM    564  N   ASN    73    -100.533 -78.211  59.553  1.00 40.09           N
ATOM    565  CA  ASN    73    -100.075 -77.728  58.287  1.00 40.09           C
ATOM    566  CB  ASN    73    -101.207 -77.219  57.380  1.00 40.09           C
ATOM    567  CG  ASN    73    -102.080 -78.405  56.996  1.00 40.09           C
ATOM    568  OD1 ASN    73    -101.582 -79.448  56.576  1.00 40.09           O
ATOM    569  ND2 ASN    73    -103.421 -78.247  57.155  1.00 40.09           N
ATOM    570  C   ASN    73     -99.214 -76.546  58.608  1.00 40.09           C
ATOM    571  O   ASN    73     -99.411 -75.891  59.631  1.00 40.09           O
ATOM    572  N   GLY    74     -98.209 -76.263  57.756  1.00 20.03           N
ATOM    573  CA  GLY    74     -97.392 -75.099  57.943  1.00 20.03           C
ATOM    574  C   GLY    74     -96.194 -75.423  58.777  1.00 20.03           C
ATOM    575  O   GLY    74     -96.039 -76.531  59.289  1.00 20.03           O
ATOM    576  N   GLY    75     -95.301 -74.423  58.917  1.00 19.53           N
ATOM    577  CA  GLY    75     -94.113 -74.558  59.704  1.00 19.53           C
ATOM    578  C   GLY    75     -93.189 -75.520  59.031  1.00 19.53           C
ATOM    579  O   GLY    75     -93.137 -75.613  57.805  1.00 19.53           O
ATOM    580  N   GLY    76     -92.429 -76.256  59.864  1.00 27.42           N
ATOM    581  CA  GLY    76     -91.461 -77.223  59.446  1.00 27.42           C
ATOM    582  C   GLY    76     -91.588 -78.375  60.392  1.00 27.42           C
ATOM    583  O   GLY    76     -92.549 -78.461  61.152  1.00 27.42           O
ATOM    584  N   HIS    77     -90.603 -79.291  60.371  1.00 66.66           N
ATOM    585  CA  HIS    77     -90.679 -80.491  61.152  1.00 66.66           C
ATOM    586  ND1 HIS    77     -89.979 -82.967  58.965  1.00 66.66           N
ATOM    587  CG  HIS    77     -89.373 -81.843  59.480  1.00 66.66           C
ATOM    588  CB  HIS    77     -89.472 -81.410  60.912  1.00 66.66           C
ATOM    589  NE2 HIS    77     -88.910 -81.990  57.277  1.00 66.66           N
ATOM    590  CD2 HIS    77     -88.724 -81.257  58.437  1.00 66.66           C
ATOM    591  CE1 HIS    77     -89.670 -83.006  57.644  1.00 66.66           C
ATOM    592  C   HIS    77     -90.741 -80.198  62.622  1.00 66.66           C
ATOM    593  O   HIS    77     -91.638 -80.677  63.314  1.00 66.66           O
ATOM    594  N   THR    78     -89.790 -79.406  63.148  1.00107.25           N
ATOM    595  CA  THR    78     -89.766 -79.125  64.557  1.00107.25           C
ATOM    596  CB  THR    78     -88.538 -78.370  64.968  1.00107.25           C
ATOM    597  OG1 THR    78     -88.511 -77.101  64.333  1.00107.25           O
ATOM    598  CG2 THR    78     -87.298 -79.188  64.566  1.00107.25           C
ATOM    599  C   THR    78     -90.947 -78.284  64.925  1.00107.25           C
ATOM    600  O   THR    78     -91.624 -78.532  65.924  1.00107.25           O
ATOM    601  N   SER    79     -91.249 -77.272  64.094  1.00 93.84           N
ATOM    602  CA  SER    79     -92.294 -76.362  64.459  1.00 93.84           C
ATOM    603  CB  SER    79     -92.468 -75.166  63.507  1.00 93.84           C
ATOM    604  OG  SER    79     -93.141 -75.552  62.322  1.00 93.84           O
ATOM    605  C   SER    79     -93.589 -77.108  64.540  1.00 93.84           C
ATOM    606  O   SER    79     -94.468 -76.744  65.319  1.00 93.84           O
ATOM    607  N   GLN    80     -93.743 -78.168  63.726  1.00 93.62           N
ATOM    608  CA  GLN    80     -94.942 -78.960  63.726  1.00 93.62           C
ATOM    609  CB  GLN    80     -94.915 -80.038  62.633  1.00 93.62           C
ATOM    610  CG  GLN    80     -96.157 -80.926  62.623  1.00 93.62           C
ATOM    611  CD  GLN    80     -95.955 -81.985  61.549  1.00 93.62           C
ATOM    612  OE1 GLN    80     -95.105 -81.841  60.671  1.00 93.62           O
ATOM    613  NE2 GLN    80     -96.753 -83.083  61.622  1.00 93.62           N
ATOM    614  C   GLN    80     -95.081 -79.683  65.033  1.00 93.62           C
ATOM    615  O   GLN    80     -96.166 -79.724  65.612  1.00 93.62           O
ATOM    616  N   VAL    81     -93.978 -80.258  65.551  1.00 56.61           N
ATOM    617  CA  VAL    81     -94.071 -81.038  66.752  1.00 56.61           C
ATOM    618  CB  VAL    81     -92.728 -81.536  67.201  1.00 56.61           C
ATOM    619  CG1 VAL    81     -92.904 -82.351  68.493  1.00 56.61           C
ATOM    620  CG2 VAL    81     -92.084 -82.311  66.040  1.00 56.61           C
ATOM    621  C   VAL    81     -94.621 -80.190  67.864  1.00 56.61           C
ATOM    622  O   VAL    81     -95.581 -80.557  68.542  1.00 56.61           O
ATOM    623  N   TYR    82     -94.058 -78.991  68.056  1.00 69.23           N
ATOM    624  CA  TYR    82     -94.489 -78.174  69.156  1.00 69.23           C
ATOM    625  CB  TYR    82     -93.663 -76.882  69.282  1.00 69.23           C
ATOM    626  CG  TYR    82     -92.288 -77.312  69.677  1.00 69.23           C
ATOM    627  CD1 TYR    82     -91.971 -77.492  71.004  1.00 69.23           C
ATOM    628  CD2 TYR    82     -91.321 -77.554  68.727  1.00 69.23           C
ATOM    629  CE1 TYR    82     -90.710 -77.894  71.378  1.00 69.23           C
ATOM    630  CE2 TYR    82     -90.058 -77.957  69.094  1.00 69.23           C
ATOM    631  CZ  TYR    82     -89.750 -78.126  70.422  1.00 69.23           C
ATOM    632  OH  TYR    82     -88.456 -78.540  70.805  1.00 69.23           O
ATOM    633  C   TYR    82     -95.944 -77.833  69.007  1.00 69.23           C
ATOM    634  O   TYR    82     -96.693 -77.840  69.984  1.00 69.23           O
ATOM    635  N   ALA    83     -96.391 -77.525  67.778  1.00 46.05           N
ATOM    636  CA  ALA    83     -97.759 -77.131  67.576  1.00 46.05           C
ATOM    637  CB  ALA    83     -98.059 -76.768  66.110  1.00 46.05           C
ATOM    638  C   ALA    83     -98.702 -78.239  67.952  1.00 46.05           C
ATOM    639  O   ALA    83     -99.684 -78.003  68.657  1.00 46.05           O
ATOM    640  N   ILE    84     -98.422 -79.485  67.517  1.00 52.49           N
ATOM    641  CA  ILE    84     -99.329 -80.571  67.770  1.00 52.49           C
ATOM    642  CB  ILE    84     -98.910 -81.846  67.090  1.00 52.49           C
ATOM    643  CG1 ILE    84     -97.556 -82.344  67.625  1.00 52.49           C
ATOM    644  CG2 ILE    84     -98.919 -81.589  65.573  1.00 52.49           C
ATOM    645  CD1 ILE    84     -97.200 -83.757  67.162  1.00 52.49           C
ATOM    646  C   ILE    84     -99.446 -80.823  69.248  1.00 52.49           C
ATOM    647  O   ILE    84    -100.549 -80.996  69.764  1.00 52.49           O
ATOM    648  N   ARG    85     -98.319 -80.825  69.985  1.00209.66           N
ATOM    649  CA  ARG    85     -98.366 -81.110  71.397  1.00209.66           C
ATOM    650  CB  ARG    85     -97.025 -80.841  72.097  1.00209.66           C
ATOM    651  CG  ARG    85     -95.814 -81.538  71.495  1.00209.66           C
ATOM    652  CD  ARG    85     -94.500 -80.843  71.871  1.00209.66           C
ATOM    653  NE  ARG    85     -94.309 -80.959  73.346  1.00209.66           N
ATOM    654  CZ  ARG    85     -93.919 -79.869  74.071  1.00209.66           C
ATOM    655  NH1 ARG    85     -93.790 -78.656  73.461  1.00209.66           N
ATOM    656  NH2 ARG    85     -93.664 -79.986  75.406  1.00209.66           N
ATOM    657  C   ARG    85     -99.260 -80.108  72.054  1.00209.66           C
ATOM    658  O   ARG    85    -100.138 -80.447  72.849  1.00209.66           O
ATOM    659  N   GLN    86     -99.054 -78.827  71.710  1.00 51.72           N
ATOM    660  CA  GLN    86     -99.775 -77.766  72.350  1.00 51.72           C
ATOM    661  CB  GLN    86     -99.392 -76.376  71.807  1.00 51.72           C
ATOM    662  CG  GLN    86    -100.084 -75.220  72.532  1.00 51.72           C
ATOM    663  CD  GLN    86     -99.615 -73.914  71.903  1.00 51.72           C
ATOM    664  OE1 GLN    86     -98.441 -73.746  71.588  1.00 51.72           O
ATOM    665  NE2 GLN    86    -100.569 -72.961  71.709  1.00 51.72           N
ATOM    666  C   GLN    86    -101.234 -77.967  72.105  1.00 51.72           C
ATOM    667  O   GLN    86    -102.051 -77.792  73.008  1.00 51.72           O
ATOM    668  N   SER    87    -101.598 -78.363  70.873  1.00 81.29           N
ATOM    669  CA  SER    87    -102.983 -78.494  70.537  1.00 81.29           C
ATOM    670  CB  SER    87    -103.206 -78.772  69.041  1.00 81.29           C
ATOM    671  OG  SER    87    -104.572 -78.569  68.708  1.00 81.29           O
ATOM    672  C   SER    87    -103.590 -79.606  71.338  1.00 81.29           C
ATOM    673  O   SER    87    -104.749 -79.519  71.734  1.00 81.29           O
ATOM    674  N   ILE    88    -102.834 -80.691  71.594  1.00 50.57           N
ATOM    675  CA  ILE    88    -103.371 -81.809  72.323  1.00 50.57           C
ATOM    676  CB  ILE    88    -102.432 -82.981  72.352  1.00 50.57           C
ATOM    677  CG1 ILE    88    -102.182 -83.505  70.928  1.00 50.57           C
ATOM    678  CG2 ILE    88    -103.016 -84.036  73.306  1.00 50.57           C
ATOM    679  CD1 ILE    88    -101.032 -84.508  70.838  1.00 50.57           C
ATOM    680  C   ILE    88    -103.658 -81.445  73.754  1.00 50.57           C
ATOM    681  O   ILE    88    -104.733 -81.745  74.274  1.00 50.57           O
ATOM    682  N   ALA    89    -102.696 -80.801  74.444  1.00 41.05           N
ATOM    683  CA  ALA    89    -102.886 -80.469  75.831  1.00 41.05           C
ATOM    684  CB  ALA    89    -101.637 -79.835  76.468  1.00 41.05           C
ATOM    685  C   ALA    89    -104.000 -79.480  75.960  1.00 41.05           C
ATOM    686  O   ALA    89    -104.876 -79.608  76.816  1.00 41.05           O
ATOM    687  N   LYS    90    -104.004 -78.467  75.078  1.00 95.11           N
ATOM    688  CA  LYS    90    -105.031 -77.474  75.126  1.00 95.11           C
ATOM    689  CB  LYS    90    -104.885 -76.394  74.041  1.00 95.11           C
ATOM    690  CG  LYS    90    -103.741 -75.408  74.297  1.00 95.11           C
ATOM    691  CD  LYS    90    -103.366 -74.588  73.060  1.00 95.11           C
ATOM    692  CE  LYS    90    -104.545 -73.848  72.423  1.00 95.11           C
ATOM    693  NZ  LYS    90    -104.627 -72.464  72.942  1.00 95.11           N
ATOM    694  C   LYS    90    -106.328 -78.177  74.905  1.00 95.11           C
ATOM    695  O   LYS    90    -107.342 -77.819  75.503  1.00 95.11           O
ATOM    696  N   ALA    91    -106.327 -79.202  74.031  1.00 51.08           N
ATOM    697  CA  ALA    91    -107.544 -79.894  73.715  1.00 51.08           C
ATOM    698  CB  ALA    91    -107.329 -81.040  72.714  1.00 51.08           C
ATOM    699  C   ALA    91    -108.112 -80.539  74.939  1.00 51.08           C
ATOM    700  O   ALA    91    -109.251 -80.261  75.310  1.00 51.08           O
ATOM    701  N   LEU    92    -107.300 -81.344  75.655  1.00128.39           N
ATOM    702  CA  LEU    92    -107.818 -82.046  76.793  1.00128.39           C
ATOM    703  CB  LEU    92    -106.783 -82.884  77.562  1.00128.39           C
ATOM    704  CG  LEU    92    -106.424 -84.230  76.913  1.00128.39           C
ATOM    705  CD1 LEU    92    -105.682 -84.068  75.580  1.00128.39           C
ATOM    706  CD2 LEU    92    -105.669 -85.111  77.915  1.00128.39           C
ATOM    707  C   LEU    92    -108.372 -81.066  77.779  1.00128.39           C
ATOM    708  O   LEU    92    -109.460 -81.273  78.315  1.00128.39           O
ATOM    709  N   VAL    93    -107.655 -79.959  78.043  1.00 52.42           N
ATOM    710  CA  VAL    93    -108.164 -79.026  79.011  1.00 52.42           C
ATOM    711  CB  VAL    93    -107.229 -77.885  79.330  1.00 52.42           C
ATOM    712  CG1 VAL    93    -105.925 -78.476  79.890  1.00 52.42           C
ATOM    713  CG2 VAL    93    -107.043 -76.986  78.099  1.00 52.42           C
ATOM    714  C   VAL    93    -109.467 -78.455  78.533  1.00 52.42           C
ATOM    715  O   VAL    93    -110.409 -78.315  79.311  1.00 52.42           O
ATOM    716  N   ALA    94    -109.579 -78.138  77.230  1.00 33.95           N
ATOM    717  CA  ALA    94    -110.787 -77.532  76.737  1.00 33.95           C
ATOM    718  CB  ALA    94    -110.748 -77.261  75.223  1.00 33.95           C
ATOM    719  C   ALA    94    -111.937 -78.460  76.997  1.00 33.95           C
ATOM    720  O   ALA    94    -113.035 -78.018  77.330  1.00 33.95           O
ATOM    721  N   TYR    95    -111.708 -79.776  76.831  1.00 60.20           N
ATOM    722  CA  TYR    95    -112.712 -80.793  76.988  1.00 60.20           C
ATOM    723  CB  TYR    95    -112.130 -82.172  76.615  1.00 60.20           C
ATOM    724  CG  TYR    95    -113.179 -83.231  76.620  1.00 60.20           C
ATOM    725  CD1 TYR    95    -113.960 -83.444  75.506  1.00 60.20           C
ATOM    726  CD2 TYR    95    -113.369 -84.023  77.729  1.00 60.20           C
ATOM    727  CE1 TYR    95    -114.922 -84.427  75.502  1.00 60.20           C
ATOM    728  CE2 TYR    95    -114.329 -85.007  77.731  1.00 60.20           C
ATOM    729  CZ  TYR    95    -115.106 -85.209  76.617  1.00 60.20           C
ATOM    730  OH  TYR    95    -116.089 -86.220  76.622  1.00 60.20           O
ATOM    731  C   TYR    95    -113.181 -80.847  78.412  1.00 60.20           C
ATOM    732  O   TYR    95    -114.378 -80.901  78.687  1.00 60.20           O
ATOM    733  N   TYR    96    -112.241 -80.819  79.369  1.00121.85           N
ATOM    734  CA  TYR    96    -112.603 -80.897  80.755  1.00121.85           C
ATOM    735  CB  TYR    96    -111.399 -81.120  81.686  1.00121.85           C
ATOM    736  CG  TYR    96    -111.109 -82.571  81.511  1.00121.85           C
ATOM    737  CD1 TYR    96    -110.404 -83.038  80.424  1.00121.85           C
ATOM    738  CD2 TYR    96    -111.569 -83.470  82.443  1.00121.85           C
ATOM    739  CE1 TYR    96    -110.163 -84.385  80.277  1.00121.85           C
ATOM    740  CE2 TYR    96    -111.333 -84.816  82.303  1.00121.85           C
ATOM    741  CZ  TYR    96    -110.627 -85.274  81.218  1.00121.85           C
ATOM    742  OH  TYR    96    -110.388 -86.656  81.075  1.00121.85           O
ATOM    743  C   TYR    96    -113.399 -79.699  81.154  1.00121.85           C
ATOM    744  O   TYR    96    -114.211 -79.770  82.076  1.00121.85           O
ATOM    745  N   GLN    97    -113.145 -78.546  80.513  1.00117.77           N
ATOM    746  CA  GLN    97    -113.849 -77.355  80.882  1.00117.77           C
ATOM    747  CB  GLN    97    -113.282 -76.125  80.146  1.00117.77           C
ATOM    748  CG  GLN    97    -113.632 -74.779  80.784  1.00117.77           C
ATOM    749  CD  GLN    97    -114.826 -74.166  80.076  1.00117.77           C
ATOM    750  OE1 GLN    97    -115.578 -73.400  80.675  1.00117.77           O
ATOM    751  NE2 GLN    97    -114.994 -74.485  78.765  1.00117.77           N
ATOM    752  C   GLN    97    -115.320 -77.490  80.576  1.00117.77           C
ATOM    753  O   GLN    97    -116.163 -77.129  81.396  1.00117.77           O
ATOM    754  N   LYS    98    -115.685 -77.968  79.370  1.00101.42           N
ATOM    755  CA  LYS    98    -117.081 -78.086  79.040  1.00101.42           C
ATOM    756  CB  LYS    98    -117.309 -78.264  77.527  1.00101.42           C
ATOM    757  CG  LYS    98    -118.787 -78.291  77.129  1.00101.42           C
ATOM    758  CD  LYS    98    -119.030 -78.215  75.620  1.00101.42           C
ATOM    759  CE  LYS    98    -118.882 -76.808  75.034  1.00101.42           C
ATOM    760  NZ  LYS    98    -119.125 -76.841  73.574  1.00101.42           N
ATOM    761  C   LYS    98    -117.773 -79.240  79.721  1.00101.42           C
ATOM    762  O   LYS    98    -118.822 -79.060  80.337  1.00101.42           O
ATOM    763  N   TYR    99    -117.245 -80.473  79.547  1.00100.50           N
ATOM    764  CA  TYR    99    -117.896 -81.666  80.035  1.00100.50           C
ATOM    765  CB  TYR    99    -117.534 -82.883  79.175  1.00100.50           C
ATOM    766  CG  TYR    99    -117.912 -82.445  77.804  1.00100.50           C
ATOM    767  CD1 TYR    99    -119.234 -82.255  77.474  1.00100.50           C
ATOM    768  CD2 TYR    99    -116.945 -82.224  76.850  1.00100.50           C
ATOM    769  CE1 TYR    99    -119.585 -81.841  76.211  1.00100.50           C
ATOM    770  CE2 TYR    99    -117.291 -81.811  75.585  1.00100.50           C
ATOM    771  CZ  TYR    99    -118.613 -81.616  75.265  1.00100.50           C
ATOM    772  OH  TYR    99    -118.970 -81.192  73.967  1.00100.50           O
ATOM    773  C   TYR    99    -117.674 -82.006  81.479  1.00100.50           C
ATOM    774  O   TYR    99    -118.627 -82.236  82.225  1.00100.50           O
ATOM    775  N   VAL   100    -116.396 -82.032  81.898  1.00 83.65           N
ATOM    776  CA  VAL   100    -115.965 -82.449  83.204  1.00 83.65           C
ATOM    777  CB  VAL   100    -114.526 -82.919  83.159  1.00 83.65           C
ATOM    778  CG1 VAL   100    -114.024 -83.391  84.535  1.00 83.65           C
ATOM    779  CG2 VAL   100    -114.446 -84.016  82.085  1.00 83.65           C
ATOM    780  C   VAL   100    -116.139 -81.273  84.130  1.00 83.65           C
ATOM    781  O   VAL   100    -116.645 -80.228  83.722  1.00 83.65           O
ATOM    782  N   ASP   101    -115.833 -81.449  85.434  1.00 60.64           N
ATOM    783  CA  ASP   101    -115.939 -80.375  86.384  1.00 60.64           C
ATOM    784  CB  ASP   101    -116.089 -80.831  87.845  1.00 60.64           C
ATOM    785  CG  ASP   101    -114.806 -81.536  88.260  1.00 60.64           C
ATOM    786  OD1 ASP   101    -114.379 -82.478  87.540  1.00 60.64           O
ATOM    787  OD2 ASP   101    -114.228 -81.124  89.300  1.00 60.64           O
ATOM    788  C   ASP   101    -114.701 -79.533  86.313  1.00 60.64           C
ATOM    789  O   ASP   101    -113.665 -79.955  85.801  1.00 60.64           O
ATOM    790  N   GLU   102    -114.789 -78.301  86.853  1.00 85.06           N
ATOM    791  CA  GLU   102    -113.716 -77.353  86.770  1.00 85.06           C
ATOM    792  CB  GLU   102    -114.085 -75.951  87.281  1.00 85.06           C
ATOM    793  CG  GLU   102    -113.040 -74.894  86.906  1.00 85.06           C
ATOM    794  CD  GLU   102    -113.133 -74.655  85.401  1.00 85.06           C
ATOM    795  OE1 GLU   102    -114.174 -75.046  84.808  1.00 85.06           O
ATOM    796  OE2 GLU   102    -112.171 -74.079  84.825  1.00 85.06           O
ATOM    797  C   GLU   102    -112.524 -77.821  87.541  1.00 85.06           C
ATOM    798  O   GLU   102    -111.390 -77.616  87.111  1.00 85.06           O
ATOM    799  N   GLN   103    -112.739 -78.484  88.691  1.00 37.24           N
ATOM    800  CA  GLN   103    -111.626 -78.840  89.521  1.00 37.24           C
ATOM    801  CB  GLN   103    -112.046 -79.610  90.786  1.00 37.24           C
ATOM    802  CG  GLN   103    -110.866 -79.994  91.681  1.00 37.24           C
ATOM    803  CD  GLN   103    -111.408 -80.743  92.889  1.00 37.24           C
ATOM    804  OE1 GLN   103    -112.617 -80.814  93.101  1.00 37.24           O
ATOM    805  NE2 GLN   103    -110.487 -81.314  93.711  1.00 37.24           N
ATOM    806  C   GLN   103    -110.691 -79.708  88.742  1.00 37.24           C
ATOM    807  O   GLN   103    -109.478 -79.515  88.802  1.00 37.24           O
ATOM    808  N   SER   104    -111.231 -80.666  87.966  1.00 74.68           N
ATOM    809  CA  SER   104    -110.409 -81.576  87.219  1.00 74.68           C
ATOM    810  CB  SER   104    -111.239 -82.566  86.389  1.00 74.68           C
ATOM    811  OG  SER   104    -110.387 -83.318  85.541  1.00 74.68           O
ATOM    812  C   SER   104    -109.558 -80.815  86.252  1.00 74.68           C
ATOM    813  O   SER   104    -108.342 -80.994  86.205  1.00 74.68           O
ATOM    814  N   LYS   105    -110.186 -79.912  85.478  1.00 83.38           N
ATOM    815  CA  LYS   105    -109.517 -79.146  84.469  1.00 83.38           C
ATOM    816  CB  LYS   105    -110.472 -78.130  83.824  1.00 83.38           C
ATOM    817  CG  LYS   105    -109.789 -77.112  82.915  1.00 83.38           C
ATOM    818  CD  LYS   105    -110.783 -76.290  82.098  1.00 83.38           C
ATOM    819  CE  LYS   105    -110.193 -74.995  81.541  1.00 83.38           C
ATOM    820  NZ  LYS   105    -110.200 -73.949  82.589  1.00 83.38           N
ATOM    821  C   LYS   105    -108.409 -78.371  85.110  1.00 83.38           C
ATOM    822  O   LYS   105    -107.295 -78.312  84.591  1.00 83.38           O
ATOM    823  N   LYS   106    -108.693 -77.771  86.276  1.00107.11           N
ATOM    824  CA  LYS   106    -107.745 -76.959  86.982  1.00107.11           C
ATOM    825  CB  LYS   106    -108.330 -76.409  88.292  1.00107.11           C
ATOM    826  CG  LYS   106    -107.371 -75.532  89.097  1.00107.11           C
ATOM    827  CD  LYS   106    -108.060 -74.830  90.266  1.00107.11           C
ATOM    828  CE  LYS   106    -108.743 -75.806  91.227  1.00107.11           C
ATOM    829  NZ  LYS   106    -109.393 -75.066  92.331  1.00107.11           N
ATOM    830  C   LYS   106    -106.562 -77.790  87.351  1.00107.11           C
ATOM    831  O   LYS   106    -105.428 -77.319  87.290  1.00107.11           O
ATOM    832  N   GLU   107    -106.788 -79.047  87.769  1.00 75.80           N
ATOM    833  CA  GLU   107    -105.664 -79.860  88.126  1.00 75.80           C
ATOM    834  CB  GLU   107    -106.007 -81.248  88.706  1.00 75.80           C
ATOM    835  CG  GLU   107    -106.325 -81.250  90.203  1.00 75.80           C
ATOM    836  CD  GLU   107    -107.803 -80.980  90.391  1.00 75.80           C
ATOM    837  OE1 GLU   107    -108.619 -81.770  89.845  1.00 75.80           O
ATOM    838  OE2 GLU   107    -108.142 -79.980  91.079  1.00 75.80           O
ATOM    839  C   GLU   107    -104.823 -80.090  86.911  1.00 75.80           C
ATOM    840  O   GLU   107    -103.599 -80.135  87.011  1.00 75.80           O
ATOM    841  N   ILE   108    -105.454 -80.260  85.731  1.00 39.39           N
ATOM    842  CA  ILE   108    -104.720 -80.540  84.524  1.00 39.39           C
ATOM    843  CB  ILE   108    -105.618 -80.815  83.352  1.00 39.39           C
ATOM    844  CG1 ILE   108    -106.492 -82.051  83.624  1.00 39.39           C
ATOM    845  CG2 ILE   108    -104.740 -80.944  82.096  1.00 39.39           C
ATOM    846  CD1 ILE   108    -107.633 -82.225  82.622  1.00 39.39           C
ATOM    847  C   ILE   108    -103.857 -79.374  84.153  1.00 39.39           C
ATOM    848  O   ILE   108    -102.676 -79.537  83.852  1.00 39.39           O
ATOM    849  N   LYS   109    -104.420 -78.153  84.183  1.00 70.00           N
ATOM    850  CA  LYS   109    -103.667 -76.986  83.830  1.00 70.00           C
ATOM    851  CB  LYS   109    -104.474 -75.682  83.943  1.00 70.00           C
ATOM    852  CG  LYS   109    -105.549 -75.526  82.866  1.00 70.00           C
ATOM    853  CD  LYS   109    -106.546 -74.407  83.167  1.00 70.00           C
ATOM    854  CE  LYS   109    -105.906 -73.020  83.256  1.00 70.00           C
ATOM    855  NZ  LYS   109    -106.939 -72.002  83.551  1.00 70.00           N
ATOM    856  C   LYS   109    -102.520 -76.884  84.779  1.00 70.00           C
ATOM    857  O   LYS   109    -101.421 -76.489  84.399  1.00 70.00           O
ATOM    858  N   ASP   110    -102.743 -77.244  86.052  1.00 72.87           N
ATOM    859  CA  ASP   110    -101.699 -77.113  87.024  1.00 72.87           C
ATOM    860  CB  ASP   110    -102.155 -77.537  88.431  1.00 72.87           C
ATOM    861  CG  ASP   110    -101.071 -77.151  89.431  1.00 72.87           C
ATOM    862  OD1 ASP   110     -99.998 -76.659  88.991  1.00 72.87           O
ATOM    863  OD2 ASP   110    -101.305 -77.347  90.653  1.00 72.87           O
ATOM    864  C   ASP   110    -100.530 -77.976  86.643  1.00 72.87           C
ATOM    865  O   ASP   110     -99.390 -77.517  86.634  1.00 72.87           O
ATOM    866  N   ILE   111    -100.785 -79.249  86.291  1.00103.92           N
ATOM    867  CA  ILE   111     -99.733 -80.185  86.008  1.00103.92           C
ATOM    868  CB  ILE   111    -100.223 -81.597  85.912  1.00103.92           C
ATOM    869  CG1 ILE   111     -99.056 -82.570  86.129  1.00103.92           C
ATOM    870  CG2 ILE   111    -100.954 -81.769  84.570  1.00103.92           C
ATOM    871  CD1 ILE   111     -99.517 -83.955  86.572  1.00103.92           C
ATOM    872  C   ILE   111     -98.992 -79.813  84.758  1.00103.92           C
ATOM    873  O   ILE   111     -97.791 -80.065  84.659  1.00103.92           O
ATOM    874  N   LEU   112     -99.701 -79.309  83.726  1.00143.69           N
ATOM    875  CA  LEU   112     -99.038 -78.900  82.519  1.00143.69           C
ATOM    876  CB  LEU   112    -100.023 -78.573  81.384  1.00143.69           C
ATOM    877  CG  LEU   112     -99.331 -78.136  80.081  1.00143.69           C
ATOM    878  CD1 LEU   112     -98.469 -79.271  79.509  1.00143.69           C
ATOM    879  CD2 LEU   112    -100.342 -77.588  79.062  1.00143.69           C
ATOM    880  C   LEU   112     -98.226 -77.668  82.768  1.00143.69           C
ATOM    881  O   LEU   112     -97.021 -77.633  82.533  1.00143.69           O
ATOM    882  N   VAL   113     -98.867 -76.639  83.341  1.00106.89           N
ATOM    883  CA  VAL   113     -98.247 -75.364  83.552  1.00106.89           C
ATOM    884  CB  VAL   113     -99.155 -74.383  84.233  1.00106.89           C
ATOM    885  CG1 VAL   113    -100.368 -74.122  83.324  1.00106.89           C
ATOM    886  CG2 VAL   113     -99.515 -74.935  85.622  1.00106.89           C
ATOM    887  C   VAL   113     -97.048 -75.536  84.431  1.00106.89           C
ATOM    888  O   VAL   113     -96.051 -74.834  84.273  1.00106.89           O
ATOM    889  N   ARG   114     -97.118 -76.447  85.417  1.00155.40           N
ATOM    890  CA  ARG   114     -96.006 -76.576  86.316  1.00155.40           C
ATOM    891  CB  ARG   114     -96.256 -77.641  87.395  1.00155.40           C
ATOM    892  CG  ARG   114     -95.055 -77.884  88.311  1.00155.40           C
ATOM    893  CD  ARG   114     -95.306 -78.949  89.382  1.00155.40           C
ATOM    894  NE  ARG   114     -94.003 -79.220  90.052  1.00155.40           N
ATOM    895  CZ  ARG   114     -93.593 -78.449  91.101  1.00155.40           C
ATOM    896  NH1 ARG   114     -94.379 -77.427  91.548  1.00155.40           N
ATOM    897  NH2 ARG   114     -92.395 -78.703  91.704  1.00155.40           N
ATOM    898  C   ARG   114     -94.753 -76.982  85.588  1.00155.40           C
ATOM    899  O   ARG   114     -93.766 -76.249  85.590  1.00155.40           O
ATOM    900  N   TYR   115     -94.774 -78.158  84.927  1.00184.71           N
ATOM    901  CA  TYR   115     -93.645 -78.690  84.206  1.00184.71           C
ATOM    902  CB  TYR   115     -93.976 -80.119  83.733  1.00184.71           C
ATOM    903  CG  TYR   115     -93.081 -80.583  82.638  1.00184.71           C
ATOM    904  CD1 TYR   115     -91.904 -81.241  82.903  1.00184.71           C
ATOM    905  CD2 TYR   115     -93.448 -80.364  81.330  1.00184.71           C
ATOM    906  CE1 TYR   115     -91.102 -81.667  81.871  1.00184.71           C
ATOM    907  CE2 TYR   115     -92.650 -80.788  80.296  1.00184.71           C
ATOM    908  CZ  TYR   115     -91.475 -81.443  80.569  1.00184.71           C
ATOM    909  OH  TYR   115     -90.650 -81.884  79.514  1.00184.71           O
ATOM    910  C   TYR   115     -93.364 -77.823  83.019  1.00184.71           C
ATOM    911  O   TYR   115     -92.256 -77.315  82.854  1.00184.71           O
ATOM    912  N   ASP   116     -94.428 -77.601  82.228  1.00181.95           N
ATOM    913  CA  ASP   116     -94.601 -76.798  81.048  1.00181.95           C
ATOM    914  CB  ASP   116     -94.980 -75.341  81.373  1.00181.95           C
ATOM    915  CG  ASP   116     -95.618 -74.727  80.138  1.00181.95           C
ATOM    916  OD1 ASP   116     -96.282 -75.488  79.385  1.00181.95           O
ATOM    917  OD2 ASP   116     -95.465 -73.493  79.937  1.00181.95           O
ATOM    918  C   ASP   116     -93.469 -76.776  80.064  1.00181.95           C
ATOM    919  O   ASP   116     -92.304 -77.051  80.346  1.00181.95           O
ATOM    920  N   ARG   117     -93.880 -76.511  78.809  1.00292.15           N
ATOM    921  CA  ARG   117     -93.062 -76.280  77.662  1.00292.15           C
ATOM    922  CB  ARG   117     -92.754 -77.575  76.898  1.00292.15           C
ATOM    923  CG  ARG   117     -91.568 -77.429  75.955  1.00292.15           C
ATOM    924  CD  ARG   117     -90.250 -77.284  76.717  1.00292.15           C
ATOM    925  NE  ARG   117     -89.570 -78.607  76.686  1.00292.15           N
ATOM    926  CZ  ARG   117     -89.816 -79.570  77.620  1.00292.15           C
ATOM    927  NH1 ARG   117     -90.661 -79.321  78.660  1.00292.15           N
ATOM    928  NH2 ARG   117     -89.212 -80.787  77.496  1.00292.15           N
ATOM    929  C   ARG   117     -93.967 -75.469  76.787  1.00292.15           C
ATOM    930  O   ARG   117     -93.952 -75.581  75.562  1.00292.15           O
ATOM    931  N   THR   118     -94.753 -74.600  77.451  1.00196.58           N
ATOM    932  CA  THR   118     -95.736 -73.690  76.935  1.00196.58           C
ATOM    933  CB  THR   118     -95.162 -72.802  75.868  1.00196.58           C
ATOM    934  OG1 THR   118     -95.839 -71.561  75.864  1.00196.58           O
ATOM    935  CG2 THR   118     -95.338 -73.471  74.494  1.00196.58           C
ATOM    936  C   THR   118     -96.966 -74.393  76.406  1.00196.58           C
ATOM    937  O   THR   118     -97.811 -73.749  75.800  1.00196.58           O
ATOM    938  N   LEU   119     -97.229 -75.657  76.790  1.00157.87           N
ATOM    939  CA  LEU   119     -98.256 -76.468  76.179  1.00157.87           C
ATOM    940  CB  LEU   119     -98.405 -77.854  76.827  1.00157.87           C
ATOM    941  CG  LEU   119     -97.050 -78.586  76.876  1.00157.87           C
ATOM    942  CD1 LEU   119     -97.203 -80.107  76.980  1.00157.87           C
ATOM    943  CD2 LEU   119     -96.124 -78.135  75.741  1.00157.87           C
ATOM    944  C   LEU   119     -99.604 -75.789  76.130  1.00157.87           C
ATOM    945  O   LEU   119    -100.409 -76.096  75.253  1.00157.87           O
ATOM    946  N   LEU   120     -99.964 -74.971  77.130  1.00120.38           N
ATOM    947  CA  LEU   120    -101.189 -74.212  77.082  1.00120.38           C
ATOM    948  CB  LEU   120    -101.815 -73.991  78.463  1.00120.38           C
ATOM    949  CG  LEU   120    -102.246 -75.335  79.074  1.00120.38           C
ATOM    950  CD1 LEU   120    -103.149 -75.141  80.292  1.00120.38           C
ATOM    951  CD2 LEU   120    -102.866 -76.253  78.011  1.00120.38           C
ATOM    952  C   LEU   120    -101.096 -72.890  76.358  1.00120.38           C
ATOM    953  O   LEU   120    -102.099 -72.408  75.833  1.00120.38           O
ATOM    954  N   VAL   121     -99.918 -72.226  76.355  1.00110.59           N
ATOM    955  CA  VAL   121     -99.860 -70.890  75.810  1.00110.59           C
ATOM    956  CB  VAL   121     -99.340 -69.876  76.785  1.00110.59           C
ATOM    957  CG1 VAL   121    -100.323 -69.787  77.964  1.00110.59           C
ATOM    958  CG2 VAL   121     -97.914 -70.269  77.197  1.00110.59           C
ATOM    959  C   VAL   121     -98.976 -70.852  74.600  1.00110.59           C
ATOM    960  O   VAL   121     -98.009 -71.598  74.496  1.00110.59           O
ATOM    961  N   ALA   122     -99.268 -69.948  73.643  1.00 40.01           N
ATOM    962  CA  ALA   122     -98.510 -69.958  72.422  1.00 40.01           C
ATOM    963  CB  ALA   122     -99.338 -69.566  71.186  1.00 40.01           C
ATOM    964  C   ALA   122     -97.349 -69.016  72.501  1.00 40.01           C
ATOM    965  O   ALA   122     -97.470 -67.885  72.970  1.00 40.01           O
ATOM    966  N   ASP   123     -96.177 -69.498  72.031  1.00 66.24           N
ATOM    967  CA  ASP   123     -94.962 -68.738  71.994  1.00 66.24           C
ATOM    968  CB  ASP   123     -93.750 -69.576  71.534  1.00 66.24           C
ATOM    969  CG  ASP   123     -92.463 -68.789  71.754  1.00 66.24           C
ATOM    970  OD1 ASP   123     -92.472 -67.549  71.530  1.00 66.24           O
ATOM    971  OD2 ASP   123     -91.450 -69.422  72.157  1.00 66.24           O
ATOM    972  C   ASP   123     -95.168 -67.619  71.017  1.00 66.24           C
ATOM    973  O   ASP   123     -95.581 -67.823  69.877  1.00 66.24           O
ATOM    974  N   PRO   124     -94.915 -66.432  71.496  1.00 80.81           N
ATOM    975  CA  PRO   124     -95.071 -65.220  70.731  1.00 80.81           C
ATOM    976  CD  PRO   124     -95.031 -66.189  72.924  1.00 80.81           C
ATOM    977  CB  PRO   124     -95.207 -64.088  71.753  1.00 80.81           C
ATOM    978  CG  PRO   124     -94.726 -64.695  73.082  1.00 80.81           C
ATOM    979  C   PRO   124     -94.007 -64.947  69.715  1.00 80.81           C
ATOM    980  O   PRO   124     -94.194 -64.039  68.907  1.00 80.81           O
ATOM    981  N   ARG   125     -92.883 -65.681  69.724  1.00145.15           N
ATOM    982  CA  ARG   125     -91.826 -65.328  68.822  1.00145.15           C
ATOM    983  CB  ARG   125     -90.568 -66.196  68.996  1.00145.15           C
ATOM    984  CG  ARG   125     -90.787 -67.679  68.696  1.00145.15           C
ATOM    985  CD  ARG   125     -89.817 -68.594  69.443  1.00145.15           C
ATOM    986  NE  ARG   125     -88.444 -68.046  69.271  1.00145.15           N
ATOM    987  CZ  ARG   125     -87.546 -68.168  70.292  1.00145.15           C
ATOM    988  NH1 ARG   125     -87.908 -68.808  71.442  1.00145.15           N
ATOM    989  NH2 ARG   125     -86.290 -67.649  70.166  1.00145.15           N
ATOM    990  C   ARG   125     -92.324 -65.467  67.418  1.00145.15           C
ATOM    991  O   ARG   125     -93.173 -66.306  67.125  1.00145.15           O
ATOM    992  N   ARG   126     -91.832 -64.594  66.515  1.00 92.42           N
ATOM    993  CA  ARG   126     -92.238 -64.643  65.139  1.00 92.42           C
ATOM    994  CB  ARG   126     -93.478 -63.797  64.814  1.00 92.42           C
ATOM    995  CG  ARG   126     -94.788 -64.434  65.270  1.00 92.42           C
ATOM    996  CD  ARG   126     -96.007 -63.579  64.937  1.00 92.42           C
ATOM    997  NE  ARG   126     -95.892 -62.333  65.742  1.00 92.42           N
ATOM    998  CZ  ARG   126     -96.536 -62.237  66.940  1.00 92.42           C
ATOM    999  NH1 ARG   126     -97.303 -63.273  67.389  1.00 92.42           N
ATOM   1000  NH2 ARG   126     -96.416 -61.102  67.688  1.00 92.42           N
ATOM   1001  C   ARG   126     -91.122 -64.109  64.305  1.00 92.42           C
ATOM   1002  O   ARG   126     -90.056 -63.765  64.813  1.00 92.42           O
ATOM   1003  N   CYS   127     -91.351 -64.047  62.978  1.00 42.80           N
ATOM   1004  CA  CYS   127     -90.349 -63.588  62.062  1.00 42.80           C
ATOM   1005  CB  CYS   127     -90.714 -63.815  60.585  1.00 42.80           C
ATOM   1006  SG  CYS   127     -90.828 -65.580  60.160  1.00 42.80           S
ATOM   1007  C   CYS   127     -90.134 -62.124  62.257  1.00 42.80           C
ATOM   1008  O   CYS   127     -91.060 -61.368  62.550  1.00 42.80           O
ATOM   1009  N   GLU   128     -88.864 -61.706  62.105  1.00 77.76           N
ATOM   1010  CA  GLU   128     -88.449 -60.339  62.225  1.00 77.76           C
ATOM   1011  CB  GLU   128     -87.198 -60.214  63.108  1.00 77.76           C
ATOM   1012  CG  GLU   128     -86.755 -58.793  63.441  1.00 77.76           C
ATOM   1013  CD  GLU   128     -85.492 -58.942  64.280  1.00 77.76           C
ATOM   1014  OE1 GLU   128     -84.568 -59.652  63.800  1.00 77.76           O
ATOM   1015  OE2 GLU   128     -85.430 -58.363  65.397  1.00 77.76           O
ATOM   1016  C   GLU   128     -88.059 -59.938  60.835  1.00 77.76           C
ATOM   1017  O   GLU   128     -87.441 -60.725  60.121  1.00 77.76           O
ATOM   1018  N   PRO   129     -88.436 -58.775  60.384  1.00219.67           N
ATOM   1019  CA  PRO   129     -88.124 -58.439  59.024  1.00219.67           C
ATOM   1020  CD  PRO   129     -89.654 -58.125  60.840  1.00219.67           C
ATOM   1021  CB  PRO   129     -88.905 -57.162  58.726  1.00219.67           C
ATOM   1022  CG  PRO   129     -90.137 -57.282  59.645  1.00219.67           C
ATOM   1023  C   PRO   129     -86.706 -58.433  58.540  1.00219.67           C
ATOM   1024  O   PRO   129     -86.255 -59.430  57.990  1.00219.67           O
ATOM   1025  N   LYS   130     -85.941 -57.367  58.792  1.00182.81           N
ATOM   1026  CA  LYS   130     -84.643 -57.292  58.186  1.00182.81           C
ATOM   1027  CB  LYS   130     -84.684 -57.621  56.675  1.00182.81           C
ATOM   1028  CG  LYS   130     -83.370 -57.553  55.888  1.00182.81           C
ATOM   1029  CD  LYS   130     -82.908 -56.138  55.540  1.00182.81           C
ATOM   1030  CE  LYS   130     -81.820 -56.107  54.463  1.00182.81           C
ATOM   1031  NZ  LYS   130     -81.503 -54.708  54.099  1.00182.81           N
ATOM   1032  C   LYS   130     -84.260 -55.875  58.354  1.00182.81           C
ATOM   1033  O   LYS   130     -85.110 -54.988  58.321  1.00182.81           O
ATOM   1034  N   LYS   131     -82.968 -55.612  58.555  1.00135.19           N
ATOM   1035  CA  LYS   131     -82.615 -54.252  58.792  1.00135.19           C
ATOM   1036  CB  LYS   131     -82.323 -54.060  60.280  1.00135.19           C
ATOM   1037  CG  LYS   131     -83.549 -54.562  61.046  1.00135.19           C
ATOM   1038  CD  LYS   131     -83.313 -54.980  62.492  1.00135.19           C
ATOM   1039  CE  LYS   131     -84.420 -55.904  63.001  1.00135.19           C
ATOM   1040  NZ  LYS   131     -84.360 -57.185  62.261  1.00135.19           N
ATOM   1041  C   LYS   131     -81.418 -53.979  57.950  1.00135.19           C
ATOM   1042  O   LYS   131     -80.576 -54.854  57.756  1.00135.19           O
ATOM   1043  N   PHE   132     -81.313 -52.747  57.422  1.00 58.26           N
ATOM   1044  CA  PHE   132     -80.249 -52.454  56.507  1.00 58.26           C
ATOM   1045  CB  PHE   132     -80.240 -50.998  56.000  1.00 58.26           C
ATOM   1046  CG  PHE   132     -79.913 -50.099  57.143  1.00 58.26           C
ATOM   1047  CD1 PHE   132     -78.603 -49.795  57.437  1.00 58.26           C
ATOM   1048  CD2 PHE   132     -80.908 -49.556  57.921  1.00 58.26           C
ATOM   1049  CE1 PHE   132     -78.288 -48.968  58.489  1.00 58.26           C
ATOM   1050  CE2 PHE   132     -80.600 -48.728  58.975  1.00 58.26           C
ATOM   1051  CZ  PHE   132     -79.290 -48.430  59.260  1.00 58.26           C
ATOM   1052  C   PHE   132     -78.950 -52.715  57.192  1.00 58.26           C
ATOM   1053  O   PHE   132     -78.813 -52.485  58.393  1.00 58.26           O
ATOM   1054  N   GLY   133     -77.952 -53.196  56.424  1.00 37.31           N
ATOM   1055  CA  GLY   133     -76.673 -53.484  57.004  1.00 37.31           C
ATOM   1056  C   GLY   133     -76.475 -54.962  57.114  1.00 37.31           C
ATOM   1057  O   GLY   133     -75.467 -55.405  57.660  1.00 37.31           O
ATOM   1058  N   GLY   134     -77.419 -55.777  56.604  1.00 25.03           N
ATOM   1059  CA  GLY   134     -77.203 -57.196  56.668  1.00 25.03           C
ATOM   1060  C   GLY   134     -78.243 -57.853  55.819  1.00 25.03           C
ATOM   1061  O   GLY   134     -79.308 -57.290  55.572  1.00 25.03           O
ATOM   1062  N   ARG   135     -77.944 -59.073  55.331  1.00165.25           N
ATOM   1063  CA  ARG   135     -78.891 -59.791  54.528  1.00165.25           C
ATOM   1064  CB  ARG   135     -78.330 -61.091  53.932  1.00165.25           C
ATOM   1065  CG  ARG   135     -77.322 -60.863  52.808  1.00165.25           C
ATOM   1066  CD  ARG   135     -76.994 -62.134  52.024  1.00165.25           C
ATOM   1067  NE  ARG   135     -76.148 -61.741  50.862  1.00165.25           N
ATOM   1068  CZ  ARG   135     -74.792 -61.668  50.992  1.00165.25           C
ATOM   1069  NH1 ARG   135     -74.202 -61.956  52.188  1.00165.25           N
ATOM   1070  NH2 ARG   135     -74.026 -61.307  49.921  1.00165.25           N
ATOM   1071  C   ARG   135     -80.066 -60.172  55.372  1.00165.25           C
ATOM   1072  O   ARG   135     -81.204 -60.139  54.903  1.00165.25           O
ATOM   1073  N   GLY   136     -79.809 -60.578  56.633  1.00 40.22           N
ATOM   1074  CA  GLY   136     -80.878 -61.032  57.485  1.00 40.22           C
ATOM   1075  C   GLY   136     -81.283 -59.976  58.468  1.00 40.22           C
ATOM   1076  O   GLY   136     -80.861 -58.823  58.394  1.00 40.22           O
ATOM   1077  N   ALA   137     -82.206 -60.349  59.382  1.00 59.77           N
ATOM   1078  CA  ALA   137     -82.627 -59.458  60.424  1.00 59.77           C
ATOM   1079  CB  ALA   137     -83.872 -59.971  61.165  1.00 59.77           C
ATOM   1080  C   ALA   137     -81.539 -59.285  61.445  1.00 59.77           C
ATOM   1081  O   ALA   137     -81.223 -58.169  61.852  1.00 59.77           O
ATOM   1082  N   ARG   138     -81.003 -60.413  61.955  1.00154.95           N
ATOM   1083  CA  ARG   138     -79.944 -60.396  62.926  1.00154.95           C
ATOM   1084  CB  ARG   138     -79.903 -61.686  63.754  1.00154.95           C
ATOM   1085  CG  ARG   138     -81.226 -61.924  64.481  1.00154.95           C
ATOM   1086  CD  ARG   138     -81.812 -60.651  65.097  1.00154.95           C
ATOM   1087  NE  ARG   138     -83.132 -61.008  65.688  1.00154.95           N
ATOM   1088  CZ  ARG   138     -83.194 -61.485  66.965  1.00154.95           C
ATOM   1089  NH1 ARG   138     -82.049 -61.604  67.697  1.00154.95           N
ATOM   1090  NH2 ARG   138     -84.393 -61.845  67.508  1.00154.95           N
ATOM   1091  C   ARG   138     -78.615 -60.210  62.280  1.00154.95           C
ATOM   1092  O   ARG   138     -77.769 -59.454  62.756  1.00154.95           O
ATOM   1093  N   SER   139     -78.414 -60.901  61.143  1.00 92.34           N
ATOM   1094  CA  SER   139     -77.127 -60.921  60.531  1.00 92.34           C
ATOM   1095  CB  SER   139     -77.033 -61.849  59.306  1.00 92.34           C
ATOM   1096  OG  SER   139     -77.842 -61.355  58.250  1.00 92.34           O
ATOM   1097  C   SER   139     -76.766 -59.552  60.092  1.00 92.34           C
ATOM   1098  O   SER   139     -77.574 -58.812  59.535  1.00 92.34           O
ATOM   1099  N   ARG   140     -75.505 -59.187  60.368  1.00153.55           N
ATOM   1100  CA  ARG   140     -74.984 -57.936  59.930  1.00153.55           C
ATOM   1101  CB  ARG   140     -74.188 -57.190  61.012  1.00153.55           C
ATOM   1102  CG  ARG   140     -75.022 -56.854  62.250  1.00153.55           C
ATOM   1103  CD  ARG   140     -76.161 -55.866  61.989  1.00153.55           C
ATOM   1104  NE  ARG   140     -77.182 -56.562  61.156  1.00153.55           N
ATOM   1105  CZ  ARG   140     -78.309 -55.898  60.769  1.00153.55           C
ATOM   1106  NH1 ARG   140     -78.513 -54.610  61.172  1.00153.55           N
ATOM   1107  NH2 ARG   140     -79.233 -56.515  59.977  1.00153.55           N
ATOM   1108  C   ARG   140     -74.045 -58.304  58.839  1.00153.55           C
ATOM   1109  O   ARG   140     -73.600 -59.448  58.773  1.00153.55           O
ATOM   1110  N   TYR   141     -73.756 -57.367  57.920  1.00 76.74           N
ATOM   1111  CA  TYR   141     -72.835 -57.687  56.877  1.00 76.74           C
ATOM   1112  CB  TYR   141     -72.867 -56.774  55.635  1.00 76.74           C
ATOM   1113  CG  TYR   141     -74.113 -57.020  54.855  1.00 76.74           C
ATOM   1114  CD1 TYR   141     -74.293 -58.207  54.184  1.00 76.74           C
ATOM   1115  CD2 TYR   141     -75.082 -56.050  54.761  1.00 76.74           C
ATOM   1116  CE1 TYR   141     -75.438 -58.432  53.455  1.00 76.74           C
ATOM   1117  CE2 TYR   141     -76.229 -56.267  54.035  1.00 76.74           C
ATOM   1118  CZ  TYR   141     -76.408 -57.462  53.382  1.00 76.74           C
ATOM   1119  OH  TYR   141     -77.584 -57.688  52.634  1.00 76.74           O
ATOM   1120  C   TYR   141     -71.479 -57.539  57.465  1.00 76.74           C
ATOM   1121  O   TYR   141     -71.245 -56.675  58.305  1.00 76.74           O
ATOM   1122  N   GLN   142     -70.558 -58.440  57.097  1.00 56.36           N
ATOM   1123  CA  GLN   142     -69.224 -58.283  57.578  1.00 56.36           C
ATOM   1124  CB  GLN   142     -68.853 -59.254  58.712  1.00 56.36           C
ATOM   1125  CG  GLN   142     -67.463 -59.000  59.296  1.00 56.36           C
ATOM   1126  CD  GLN   142     -67.295 -59.909  60.502  1.00 56.36           C
ATOM   1127  OE1 GLN   142     -67.731 -61.059  60.496  1.00 56.36           O
ATOM   1128  NE2 GLN   142     -66.655 -59.375  61.576  1.00 56.36           N
ATOM   1129  C   GLN   142     -68.350 -58.564  56.412  1.00 56.36           C
ATOM   1130  O   GLN   142     -68.723 -59.324  55.520  1.00 56.36           O
ATOM   1131  N   LYS   143     -67.172 -57.924  56.359  1.00167.03           N
ATOM   1132  CA  LYS   143     -66.322 -58.203  55.246  1.00167.03           C
ATOM   1133  CB  LYS   143     -65.882 -56.953  54.466  1.00167.03           C
ATOM   1134  CG  LYS   143     -67.035 -56.260  53.738  1.00167.03           C
ATOM   1135  CD  LYS   143     -67.764 -57.175  52.752  1.00167.03           C
ATOM   1136  CE  LYS   143     -66.865 -57.721  51.641  1.00167.03           C
ATOM   1137  NZ  LYS   143     -67.648 -58.603  50.747  1.00167.03           N
ATOM   1138  C   LYS   143     -65.089 -58.846  55.776  1.00167.03           C
ATOM   1139  O   LYS   143     -64.430 -58.312  56.666  1.00167.03           O
ATOM   1140  N   SER   144     -64.764 -60.041  55.252  1.00147.21           N
ATOM   1141  CA  SER   144     -63.567 -60.696  55.667  1.00147.21           C
ATOM   1142  CB  SER   144     -63.802 -61.906  56.587  1.00147.21           C
ATOM   1143  OG  SER   144     -64.400 -61.490  57.805  1.00147.21           O
ATOM   1144  C   SER   144     -62.951 -61.229  54.429  1.00147.21           C
ATOM   1145  O   SER   144     -63.613 -61.872  53.615  1.00147.21           O
ATOM   1146  N   TYR   145     -61.653 -60.963  54.241  1.00 63.73           N
ATOM   1147  CA  TYR   145     -61.035 -61.532  53.092  1.00 63.73           C
ATOM   1148  CB  TYR   145     -60.245 -60.510  52.259  1.00 63.73           C
ATOM   1149  CG  TYR   145     -61.259 -59.552  51.728  1.00 63.73           C
ATOM   1150  CD1 TYR   145     -61.997 -59.863  50.609  1.00 63.73           C
ATOM   1151  CD2 TYR   145     -61.481 -58.346  52.352  1.00 63.73           C
ATOM   1152  CE1 TYR   145     -62.936 -58.986  50.118  1.00 63.73           C
ATOM   1153  CE2 TYR   145     -62.418 -57.463  51.866  1.00 63.73           C
ATOM   1154  CZ  TYR   145     -63.148 -57.783  50.747  1.00 63.73           C
ATOM   1155  OH  TYR   145     -64.110 -56.882  50.245  1.00 63.73           O
ATOM   1156  C   TYR   145     -60.111 -62.561  53.636  1.00 63.73           C
ATOM   1157  O   TYR   145     -59.088 -62.245  54.240  1.00 63.73           O
ATOM   1158  N   ARG   146     -60.480 -63.839  53.445  1.00112.46           N
ATOM   1159  CA  ARG   146     -59.707 -64.907  53.993  1.00112.46           C
ATOM   1160  CB  ARG   146     -60.592 -66.004  54.610  1.00112.46           C
ATOM   1161  CG  ARG   146     -61.480 -65.473  55.740  1.00112.46           C
ATOM   1162  CD  ARG   146     -62.507 -66.476  56.273  1.00112.46           C
ATOM   1163  NE  ARG   146     -61.953 -67.086  57.515  1.00112.46           N
ATOM   1164  CZ  ARG   146     -61.284 -68.274  57.457  1.00112.46           C
ATOM   1165  NH1 ARG   146     -61.124 -68.912  56.261  1.00112.46           N
ATOM   1166  NH2 ARG   146     -60.781 -68.828  58.598  1.00112.46           N
ATOM   1167  C   ARG   146     -58.930 -65.523  52.842  1.00112.46           C
ATOM   1168  O   ARG   146     -59.170 -66.723  52.547  1.00112.46           O
ATOM   1169  OXT ARG   146     -58.088 -64.802  52.242  1.00112.46           O
TER    1170      ARG   146
TER    1171      ARG   146

END
