# Supplementary material for: Uses of Phage Display in Agriculture: Sequence Analysis and Comparative Modeling of Late Embryogenesis Abundant Client Proteins Suggest Protein-Nucleic Acid Binding Functionality
Source: Comput Math Methods Med. 2013 Jul 9;2013:470390. doi: 10.1155/2013/470390 (PMC3727180; doi:10.1155/2013/470390)
Supplement: Supplementary file 1 — LEA client protein homology models. The seven PDB coordinate files are labeled by the TAIR locus identifier of the full-length protein from which the binding region originates. [file 470390.f1.zip › 470390.f1/at5g44120.1.pdb]

ATOM      1  N   GLN   122     -39.264  37.826  16.289  1.00 86.36           N  
ATOM      2  CA  GLN   122     -37.904  37.786  15.851  1.00 86.36           C  
ATOM      3  C   GLN   122     -37.562  36.385  15.397  1.00 86.36           C  
ATOM      4  O   GLN   122     -36.976  36.211  14.331  1.00 86.36           O  
ATOM      5  CB  GLN   122     -36.967  38.176  16.989  1.00 86.36           C  
ATOM      6  CG  GLN   122     -37.211  37.274  18.188  1.00 86.36           C  
ATOM      7  CD  GLN   122     -36.181  37.586  19.249  1.00 86.36           C  
ATOM      8  NE2 GLN   122     -35.364  38.643  19.007  1.00 86.36           N  
ATOM      9  OE1 GLN   122     -36.108  36.898  20.265  1.00 86.36           O  
ATOM     10  N   LEU   123     -37.885  35.354  16.226  1.00127.52           N  
ATOM     11  CA  LEU   123     -37.571  33.967  15.949  1.00127.52           C  
ATOM     12  C   LEU   123     -38.430  33.278  14.921  1.00127.52           C  
ATOM     13  O   LEU   123     -37.908  32.651  13.999  1.00127.52           O  
ATOM     14  CB  LEU   123     -37.578  33.046  17.190  1.00127.52           C  
ATOM     15  CG  LEU   123     -36.351  33.202  18.106  1.00127.52           C  
ATOM     16  CD1 LEU   123     -35.055  32.901  17.342  1.00127.52           C  
ATOM     17  CD2 LEU   123     -36.320  34.555  18.820  1.00127.52           C  
ATOM     18  N   GLY   124     -39.770  33.362  15.056  1.00 39.83           N  
ATOM     19  CA  GLY   124     -40.683  32.686  14.170  1.00 39.83           C  
ATOM     20  C   GLY   124     -41.856  32.173  14.972  1.00 39.83           C  
ATOM     21  O   GLY   124     -42.058  32.566  16.120  1.00 39.83           O  
ATOM     22  N   TYR   125     -42.686  31.282  14.374  1.00171.58           N  
ATOM     23  CA  TYR   125     -43.822  30.782  15.110  1.00171.58           C  
ATOM     24  C   TYR   125     -44.041  29.320  14.856  1.00171.58           C  
ATOM     25  O   TYR   125     -43.451  28.737  13.947  1.00171.58           O  
ATOM     26  CB  TYR   125     -45.143  31.532  14.821  1.00171.58           C  
ATOM     27  CG  TYR   125     -45.523  31.476  13.375  1.00171.58           C  
ATOM     28  CD1 TYR   125     -45.099  32.455  12.502  1.00171.58           C  
ATOM     29  CD2 TYR   125     -46.317  30.461  12.889  1.00171.58           C  
ATOM     30  CE1 TYR   125     -45.452  32.416  11.174  1.00171.58           C  
ATOM     31  CE2 TYR   125     -46.674  30.416  11.563  1.00171.58           C  
ATOM     32  CZ  TYR   125     -46.241  31.394  10.700  1.00171.58           C  
ATOM     33  OH  TYR   125     -46.608  31.347   9.336  1.00171.58           O  
ATOM     34  N   ILE   126     -44.836  28.673  15.746  1.00 73.60           N  
ATOM     35  CA  ILE   126     -45.295  27.329  15.523  1.00 73.60           C  
ATOM     36  C   ILE   126     -46.771  27.341  15.773  1.00 73.60           C  
ATOM     37  O   ILE   126     -47.233  27.797  16.817  1.00 73.60           O  
ATOM     38  CB  ILE   126     -44.703  26.273  16.420  1.00 73.60           C  
ATOM     39  CG1 ILE   126     -43.190  26.164  16.187  1.00 73.60           C  
ATOM     40  CG2 ILE   126     -45.450  24.944  16.171  1.00 73.60           C  
ATOM     41  CD1 ILE   126     -42.501  25.266  17.207  1.00 73.60           C  
ATOM     42  N   SER   127     -47.560  26.844  14.806  1.00122.05           N  
ATOM     43  CA  SER   127     -48.980  26.831  15.011  1.00122.05           C  
ATOM     44  C   SER   127     -49.433  25.404  14.915  1.00122.05           C  
ATOM     45  O   SER   127     -48.703  24.557  14.400  1.00122.05           O  
ATOM     46  CB  SER   127     -49.767  27.754  14.060  1.00122.05           C  
ATOM     47  OG  SER   127     -49.548  27.396  12.705  1.00122.05           O  
ATOM     48  N   THR   128     -50.628  25.074  15.460  1.00 72.61           N  
ATOM     49  CA  THR   128     -51.002  23.687  15.487  1.00 72.61           C  
ATOM     50  C   THR   128     -52.468  23.470  15.256  1.00 72.61           C  
ATOM     51  O   THR   128     -53.309  24.281  15.639  1.00 72.61           O  
ATOM     52  CB  THR   128     -50.687  23.022  16.804  1.00 72.61           C  
ATOM     53  CG2 THR   128     -51.212  21.578  16.821  1.00 72.61           C  
ATOM     54  OG1 THR   128     -49.286  23.030  17.024  1.00 72.61           O  
ATOM     55  N   LEU   129     -52.790  22.329  14.612  1.00 95.47           N  
ATOM     56  CA  LEU   129     -54.155  21.932  14.421  1.00 95.47           C  
ATOM     57  C   LEU   129     -54.475  20.768  15.311  1.00 95.47           C  
ATOM     58  O   LEU   129     -54.338  19.606  14.928  1.00 95.47           O  
ATOM     59  CB  LEU   129     -54.507  21.519  12.975  1.00 95.47           C  
ATOM     60  CG  LEU   129     -54.779  22.690  12.009  1.00 95.47           C  
ATOM     61  CD1 LEU   129     -55.031  22.186  10.575  1.00 95.47           C  
ATOM     62  CD2 LEU   129     -55.944  23.555  12.521  1.00 95.47           C  
ATOM     63  N   ASN   130     -54.947  21.069  16.534  1.00 88.50           N  
ATOM     64  CA  ASN   130     -55.382  20.038  17.427  1.00 88.50           C  
ATOM     65  C   ASN   130     -56.763  19.723  16.977  1.00 88.50           C  
ATOM     66  O   ASN   130     -57.231  20.258  15.974  1.00 88.50           O  
ATOM     67  CB  ASN   130     -55.502  20.472  18.895  1.00 88.50           C  
ATOM     68  CG  ASN   130     -54.102  20.710  19.425  1.00 88.50           C  
ATOM     69  ND2 ASN   130     -53.332  19.607  19.621  1.00 88.50           N  
ATOM     70  OD1 ASN   130     -53.698  21.848  19.655  1.00 88.50           O  
ATOM     71  N   SER   131     -57.415  18.788  17.684  1.00 55.09           N  
ATOM     72  CA  SER   131     -58.773  18.403  17.430  1.00 55.09           C  
ATOM     73  C   SER   131     -59.662  19.518  17.883  1.00 55.09           C  
ATOM     74  O   SER   131     -60.828  19.595  17.501  1.00 55.09           O  
ATOM     75  CB  SER   131     -59.138  17.114  18.192  1.00 55.09           C  
ATOM     76  OG  SER   131     -58.868  17.255  19.580  1.00 55.09           O  
ATOM     77  N   TYR   132     -59.121  20.420  18.713  1.00 72.47           N  
ATOM     78  CA  TYR   132     -59.896  21.509  19.229  1.00 72.47           C  
ATOM     79  C   TYR   132     -60.319  22.360  18.068  1.00 72.47           C  
ATOM     80  O   TYR   132     -61.389  22.969  18.087  1.00 72.47           O  
ATOM     81  CB  TYR   132     -59.086  22.401  20.185  1.00 72.47           C  
ATOM     82  CG  TYR   132     -58.595  21.553  21.310  1.00 72.47           C  
ATOM     83  CD1 TYR   132     -59.394  21.258  22.390  1.00 72.47           C  
ATOM     84  CD2 TYR   132     -57.317  21.048  21.277  1.00 72.47           C  
ATOM     85  CE1 TYR   132     -58.906  20.474  23.415  1.00 72.47           C  
ATOM     86  CE2 TYR   132     -56.827  20.267  22.294  1.00 72.47           C  
ATOM     87  CZ  TYR   132     -57.626  19.978  23.370  1.00 72.47           C  
ATOM     88  OH  TYR   132     -57.129  19.175  24.420  1.00 72.47           O  
ATOM     89  N   ASP   133     -59.412  22.511  17.084  1.00 87.61           N  
ATOM     90  CA  ASP   133     -59.620  23.317  15.914  1.00 87.61           C  
ATOM     91  C   ASP   133     -60.579  22.669  14.959  1.00 87.61           C  
ATOM     92  O   ASP   133     -61.606  23.241  14.595  1.00 87.61           O  
ATOM     93  CB  ASP   133     -58.318  23.505  15.118  1.00 87.61           C  
ATOM     94  CG  ASP   133     -57.275  24.145  16.027  1.00 87.61           C  
ATOM     95  OD1 ASP   133     -57.527  24.295  17.253  1.00 87.61           O  
ATOM     96  OD2 ASP   133     -56.190  24.485  15.489  1.00 87.61           O1-
ATOM     97  N   LEU   134     -60.262  21.425  14.549  1.00 88.24           N  
ATOM     98  CA  LEU   134     -61.067  20.772  13.562  1.00 88.24           C  
ATOM     99  C   LEU   134     -61.621  19.523  14.160  1.00 88.24           C  
ATOM    100  O   LEU   134     -60.908  18.539  14.340  1.00 88.24           O  
ATOM    101  CB  LEU   134     -60.286  20.311  12.323  1.00 88.24           C  
ATOM    102  CG  LEU   134     -59.666  21.434  11.476  1.00 88.24           C  
ATOM    103  CD1 LEU   134     -59.222  20.871  10.114  1.00 88.24           C  
ATOM    104  CD2 LEU   134     -60.581  22.667  11.389  1.00 88.24           C  
ATOM    105  N   PRO   135     -62.897  19.511  14.398  1.00 84.16           N  
ATOM    106  CA  PRO   135     -63.559  18.408  15.027  1.00 84.16           C  
ATOM    107  C   PRO   135     -63.450  17.169  14.209  1.00 84.16           C  
ATOM    108  O   PRO   135     -63.582  16.081  14.765  1.00 84.16           O  
ATOM    109  CB  PRO   135     -65.015  18.837  15.202  1.00 84.16           C  
ATOM    110  CG  PRO   135     -64.947  20.375  15.231  1.00 84.16           C  
ATOM    111  CD  PRO   135     -63.706  20.722  14.387  1.00 84.16           C  
ATOM    112  N   ILE   136     -63.222  17.311  12.894  1.00 75.85           N  
ATOM    113  CA  ILE   136     -63.117  16.188  12.013  1.00 75.85           C  
ATOM    114  C   ILE   136     -61.968  15.357  12.482  1.00 75.85           C  
ATOM    115  O   ILE   136     -61.980  14.132  12.391  1.00 75.85           O  
ATOM    116  CB  ILE   136     -62.810  16.588  10.598  1.00 75.85           C  
ATOM    117  CG1 ILE   136     -62.789  15.328   9.723  1.00 75.85           C  
ATOM    118  CG2 ILE   136     -61.508  17.409  10.562  1.00 75.85           C  
ATOM    119  CD1 ILE   136     -62.662  15.631   8.234  1.00 75.85           C  
ATOM    120  N   LEU   137     -60.933  16.028  13.004  1.00 89.81           N  
ATOM    121  CA  LEU   137     -59.707  15.385  13.362  1.00 89.81           C  
ATOM    122  C   LEU   137     -59.839  14.343  14.431  1.00 89.81           C  
ATOM    123  O   LEU   137     -59.072  13.381  14.407  1.00 89.81           O  
ATOM    124  CB  LEU   137     -58.590  16.368  13.750  1.00 89.81           C  
ATOM    125  CG  LEU   137     -58.156  17.214  12.539  1.00 89.81           C  
ATOM    126  CD1 LEU   137     -56.867  18.008  12.822  1.00 89.81           C  
ATOM    127  CD2 LEU   137     -58.087  16.352  11.269  1.00 89.81           C  
ATOM    128  N   ARG   138     -60.757  14.468  15.410  1.00133.37           N  
ATOM    129  CA  ARG   138     -60.753  13.399  16.368  1.00133.37           C  
ATOM    130  C   ARG   138     -61.157  12.143  15.672  1.00133.37           C  
ATOM    131  O   ARG   138     -60.858  11.041  16.129  1.00133.37           O  
ATOM    132  CB  ARG   138     -61.563  13.572  17.666  1.00133.37           C  
ATOM    133  CG  ARG   138     -61.110  12.514  18.687  1.00133.37           C  
ATOM    134  CD  ARG   138     -61.284  12.895  20.158  1.00133.37           C  
ATOM    135  NE  ARG   138     -60.403  14.067  20.419  1.00133.37           N  
ATOM    136  CZ  ARG   138     -59.111  13.900  20.832  1.00133.37           C  
ATOM    137  NH1 ARG   138     -58.600  12.649  21.038  1.00133.37           N1+
ATOM    138  NH2 ARG   138     -58.329  15.000  21.036  1.00133.37           N  
ATOM    139  N   PHE   139     -61.912  12.278  14.570  1.00 84.56           N  
ATOM    140  CA  PHE   139     -62.290  11.125  13.815  1.00 84.56           C  
ATOM    141  C   PHE   139     -61.055  10.508  13.184  1.00 84.56           C  
ATOM    142  O   PHE   139     -60.807   9.311  13.330  1.00 84.56           O  
ATOM    143  CB  PHE   139     -63.282  11.508  12.691  1.00 84.56           C  
ATOM    144  CG  PHE   139     -64.403  12.334  13.260  1.00 84.56           C  
ATOM    145  CD1 PHE   139     -65.259  11.840  14.218  1.00 84.56           C  
ATOM    146  CD2 PHE   139     -64.630  13.616  12.799  1.00 84.56           C  
ATOM    147  CE1 PHE   139     -66.281  12.619  14.715  1.00 84.56           C  
ATOM    148  CE2 PHE   139     -65.647  14.403  13.286  1.00 84.56           C  
ATOM    149  CZ  PHE   139     -66.477  13.900  14.256  1.00 84.56           C  
ATOM    150  N   ILE   140     -60.231  11.331  12.490  1.00138.86           N  
ATOM    151  CA  ILE   140     -59.053  10.922  11.750  1.00138.86           C  
ATOM    152  C   ILE   140     -57.984  10.420  12.672  1.00138.86           C  
ATOM    153  O   ILE   140     -57.215   9.526  12.321  1.00138.86           O  
ATOM    154  CB  ILE   140     -58.440  12.000  10.886  1.00138.86           C  
ATOM    155  CG1 ILE   140     -57.502  11.383   9.828  1.00138.86           C  
ATOM    156  CG2 ILE   140     -57.751  13.037  11.790  1.00138.86           C  
ATOM    157  CD1 ILE   140     -58.244  10.688   8.686  1.00138.86           C  
ATOM    158  N   ARG   141     -57.889  11.000  13.877  1.00155.39           N  
ATOM    159  CA  ARG   141     -56.836  10.639  14.782  1.00155.39           C  
ATOM    160  C   ARG   141     -55.526  11.132  14.231  1.00155.39           C  
ATOM    161  O   ARG   141     -54.502  10.455  14.345  1.00155.39           O  
ATOM    162  CB  ARG   141     -56.740   9.123  15.028  1.00155.39           C  
ATOM    163  CG  ARG   141     -57.806   8.569  15.979  1.00155.39           C  
ATOM    164  CD  ARG   141     -57.623   7.078  16.280  1.00155.39           C  
ATOM    165  NE  ARG   141     -56.225   6.878  16.771  1.00155.39           N  
ATOM    166  CZ  ARG   141     -55.907   6.995  18.095  1.00155.39           C  
ATOM    167  NH1 ARG   141     -56.871   7.300  19.011  1.00155.39           N1+
ATOM    168  NH2 ARG   141     -54.615   6.813  18.503  1.00155.39           N  
ATOM    169  N   LEU   142     -55.548  12.340  13.619  1.00 69.36           N  
ATOM    170  CA  LEU   142     -54.374  12.987  13.092  1.00 69.36           C  
ATOM    171  C   LEU   142     -54.306  14.394  13.622  1.00 69.36           C  
ATOM    172  O   LEU   142     -55.301  14.950  14.094  1.00 69.36           O  
ATOM    173  CB  LEU   142     -54.337  13.046  11.555  1.00 69.36           C  
ATOM    174  CG  LEU   142     -54.064  11.681  10.898  1.00 69.36           C  
ATOM    175  CD1 LEU   142     -54.074  11.793   9.368  1.00 69.36           C  
ATOM    176  CD2 LEU   142     -52.750  11.069  11.416  1.00 69.36           C  
ATOM    177  N   SER   143     -53.090  14.996  13.573  1.00 54.51           N  
ATOM    178  CA  SER   143     -52.807  16.312  14.082  1.00 54.51           C  
ATOM    179  C   SER   143     -51.728  16.907  13.223  1.00 54.51           C  
ATOM    180  O   SER   143     -51.026  16.182  12.521  1.00 54.51           O  
ATOM    181  CB  SER   143     -52.273  16.272  15.528  1.00 54.51           C  
ATOM    182  OG  SER   143     -51.977  17.582  15.991  1.00 54.51           O  
ATOM    183  N   ALA   144     -51.567  18.251  13.234  1.00 51.46           N  
ATOM    184  CA  ALA   144     -50.527  18.827  12.422  1.00 51.46           C  
ATOM    185  C   ALA   144     -49.906  19.984  13.135  1.00 51.46           C  
ATOM    186  O   ALA   144     -50.513  20.597  14.013  1.00 51.46           O  
ATOM    187  CB  ALA   144     -51.004  19.341  11.055  1.00 51.46           C  
ATOM    188  N   LEU   145     -48.641  20.281  12.770  1.00120.62           N  
ATOM    189  CA  LEU   145     -47.881  21.357  13.342  1.00120.62           C  
ATOM    190  C   LEU   145     -47.165  22.053  12.224  1.00120.62           C  
ATOM    191  O   LEU   145     -46.424  21.435  11.461  1.00120.62           O  
ATOM    192  CB  LEU   145     -46.840  20.837  14.368  1.00120.62           C  
ATOM    193  CG  LEU   145     -45.945  21.887  15.076  1.00120.62           C  
ATOM    194  CD1 LEU   145     -45.103  21.236  16.183  1.00120.62           C  
ATOM    195  CD2 LEU   145     -45.013  22.641  14.112  1.00120.62           C  
ATOM    196  N   ARG   146     -47.331  23.386  12.124  1.00120.60           N  
ATOM    197  CA  ARG   146     -46.656  24.141  11.102  1.00120.60           C  
ATOM    198  C   ARG   146     -45.692  25.070  11.782  1.00120.60           C  
ATOM    199  O   ARG   146     -46.005  25.627  12.832  1.00120.60           O  
ATOM    200  CB  ARG   146     -47.608  25.030  10.299  1.00120.60           C  
ATOM    201  CG  ARG   146     -46.862  25.812   9.228  1.00120.60           C  
ATOM    202  CD  ARG   146     -46.196  24.879   8.220  1.00120.60           C  
ATOM    203  NE  ARG   146     -45.271  25.686   7.387  1.00120.60           N  
ATOM    204  CZ  ARG   146     -45.683  26.110   6.160  1.00120.60           C  
ATOM    205  NH1 ARG   146     -46.947  25.816   5.744  1.00120.60           N1+
ATOM    206  NH2 ARG   146     -44.830  26.795   5.345  1.00120.60           N  
ATOM    207  N   GLY   147     -44.488  25.273  11.202  1.00 45.01           N  
ATOM    208  CA  GLY   147     -43.568  26.147  11.874  1.00 45.01           C  
ATOM    209  C   GLY   147     -42.681  26.848  10.893  1.00 45.01           C  
ATOM    210  O   GLY   147     -42.219  26.266   9.911  1.00 45.01           O  
ATOM    211  N   SER   148     -42.427  28.145  11.166  1.00 64.59           N  
ATOM    212  CA  SER   148     -41.529  28.951  10.388  1.00 64.59           C  
ATOM    213  C   SER   148     -40.554  29.570  11.341  1.00 64.59           C  
ATOM    214  O   SER   148     -40.943  30.232  12.299  1.00 64.59           O  
ATOM    215  CB  SER   148     -42.193  30.126   9.649  1.00 64.59           C  
ATOM    216  OG  SER   148     -42.928  29.654   8.532  1.00 64.59           O  
ATOM    217  N   ILE   149     -39.249  29.372  11.096  1.00 74.65           N  
ATOM    218  CA  ILE   149     -38.265  29.957  11.965  1.00 74.65           C  
ATOM    219  C   ILE   149     -37.167  30.564  11.146  1.00 74.65           C  
ATOM    220  O   ILE   149     -36.937  30.174  10.006  1.00 74.65           O  
ATOM    221  CB  ILE   149     -37.748  28.977  12.977  1.00 74.65           C  
ATOM    222  CG1 ILE   149     -37.138  27.747  12.295  1.00 74.65           C  
ATOM    223  CG2 ILE   149     -38.914  28.643  13.926  1.00 74.65           C  
ATOM    224  CD1 ILE   149     -36.608  26.710  13.287  1.00 74.65           C  
ATOM    225  N   ARG   150     -36.468  31.579  11.693  1.00135.19           N  
ATOM    226  CA  ARG   150     -35.458  32.264  10.927  1.00135.19           C  
ATOM    227  C   ARG   150     -34.117  31.695  11.257  1.00135.19           C  
ATOM    228  O   ARG   150     -33.959  31.053  12.293  1.00135.19           O  
ATOM    229  CB  ARG   150     -35.395  33.771  11.197  1.00135.19           C  
ATOM    230  CG  ARG   150     -36.671  34.516  10.808  1.00135.19           C  
ATOM    231  CD  ARG   150     -36.396  35.959  10.390  1.00135.19           C  
ATOM    232  NE  ARG   150     -35.853  36.687  11.572  1.00135.19           N  
ATOM    233  CZ  ARG   150     -34.855  37.609  11.420  1.00135.19           C  
ATOM    234  NH1 ARG   150     -34.301  37.821  10.190  1.00135.19           N1+
ATOM    235  NH2 ARG   150     -34.405  38.318  12.494  1.00135.19           N  
ATOM    236  N   GLN   151     -33.114  31.964  10.381  1.00120.16           N  
ATOM    237  CA  GLN   151     -31.779  31.416  10.479  1.00120.16           C  
ATOM    238  C   GLN   151     -31.297  31.418  11.886  1.00120.16           C  
ATOM    239  O   GLN   151     -31.419  32.400  12.615  1.00120.16           O  
ATOM    240  CB  GLN   151     -30.667  32.194   9.742  1.00120.16           C  
ATOM    241  CG  GLN   151     -30.656  32.063   8.226  1.00120.16           C  
ATOM    242  CD  GLN   151     -29.468  32.809   7.643  1.00120.16           C  
ATOM    243  NE2 GLN   151     -28.523  32.039   7.039  1.00120.16           N  
ATOM    244  OE1 GLN   151     -29.385  34.034   7.707  1.00120.16           O  
ATOM    245  N   ASN   152     -30.730  30.263  12.274  1.00 84.86           N  
ATOM    246  CA  ASN   152     -30.108  29.999  13.536  1.00 84.86           C  
ATOM    247  C   ASN   152     -31.086  30.006  14.675  1.00 84.86           C  
ATOM    248  O   ASN   152     -30.677  30.025  15.835  1.00 84.86           O  
ATOM    249  CB  ASN   152     -28.913  30.924  13.795  1.00 84.86           C  
ATOM    250  CG  ASN   152     -27.877  30.549  12.735  1.00 84.86           C  
ATOM    251  ND2 ASN   152     -26.952  31.492  12.415  1.00 84.86           N  
ATOM    252  OD1 ASN   152     -27.898  29.444  12.192  1.00 84.86           O  
ATOM    253  N   ALA   153     -32.405  29.953  14.391  1.00 47.14           N  
ATOM    254  CA  ALA   153     -33.364  29.792  15.451  1.00 47.14           C  
ATOM    255  C   ALA   153     -33.329  28.336  15.807  1.00 47.14           C  
ATOM    256  O   ALA   153     -33.073  27.492  14.948  1.00 47.14           O  
ATOM    257  CB  ALA   153     -34.815  30.098  15.041  1.00 47.14           C  
ATOM    258  N   MET   154     -33.595  27.986  17.086  1.00 62.08           N  
ATOM    259  CA  MET   154     -33.518  26.596  17.447  1.00 62.08           C  
ATOM    260  C   MET   154     -34.765  26.178  18.164  1.00 62.08           C  
ATOM    261  O   MET   154     -35.299  26.911  18.996  1.00 62.08           O  
ATOM    262  CB  MET   154     -32.321  26.290  18.370  1.00 62.08           C  
ATOM    263  CG  MET   154     -32.116  24.803  18.665  1.00 62.08           C  
ATOM    264  SD  MET   154     -30.498  24.389  19.392  1.00 62.08           S  
ATOM    265  CE  MET   154     -30.848  25.020  21.058  1.00 62.08           C  
ATOM    266  N   VAL   155     -35.278  24.970  17.838  1.00 68.20           N  
ATOM    267  CA  VAL   155     -36.406  24.475  18.571  1.00 68.20           C  
ATOM    268  C   VAL   155     -35.846  23.497  19.559  1.00 68.20           C  
ATOM    269  O   VAL   155     -35.330  22.440  19.199  1.00 68.20           O  
ATOM    270  CB  VAL   155     -37.441  23.779  17.738  1.00 68.20           C  
ATOM    271  CG1 VAL   155     -38.536  23.242  18.673  1.00 68.20           C  
ATOM    272  CG2 VAL   155     -37.977  24.776  16.696  1.00 68.20           C  
ATOM    273  N   LEU   156     -35.981  23.825  20.854  1.00 85.30           N  
ATOM    274  CA  LEU   156     -35.410  23.049  21.921  1.00 85.30           C  
ATOM    275  C   LEU   156     -35.883  21.627  21.811  1.00 85.30           C  
ATOM    276  O   LEU   156     -36.981  21.342  21.340  1.00 85.30           O  
ATOM    277  CB  LEU   156     -35.746  23.620  23.317  1.00 85.30           C  
ATOM    278  CG  LEU   156     -35.005  24.938  23.627  1.00 85.30           C  
ATOM    279  CD1 LEU   156     -35.472  25.560  24.957  1.00 85.30           C  
ATOM    280  CD2 LEU   156     -33.484  24.716  23.600  1.00 85.30           C  
ATOM    281  N   PRO   157     -35.038  20.719  22.232  1.00 92.47           N  
ATOM    282  CA  PRO   157     -35.292  19.313  22.114  1.00 92.47           C  
ATOM    283  C   PRO   157     -36.602  18.920  22.712  1.00 92.47           C  
ATOM    284  O   PRO   157     -36.810  19.121  23.908  1.00 92.47           O  
ATOM    285  CB  PRO   157     -34.076  18.623  22.732  1.00 92.47           C  
ATOM    286  CG  PRO   157     -32.939  19.644  22.518  1.00 92.47           C  
ATOM    287  CD  PRO   157     -33.643  21.014  22.502  1.00 92.47           C  
ATOM    288  N   GLN   158     -37.477  18.313  21.886  1.00157.23           N  
ATOM    289  CA  GLN   158     -38.794  17.923  22.298  1.00157.23           C  
ATOM    290  C   GLN   158     -39.026  16.523  21.826  1.00157.23           C  
ATOM    291  O   GLN   158     -38.320  16.018  20.955  1.00157.23           O  
ATOM    292  CB  GLN   158     -39.912  18.717  21.591  1.00157.23           C  
ATOM    293  CG  GLN   158     -39.937  20.217  21.877  1.00157.23           C  
ATOM    294  CD  GLN   158     -40.824  20.902  20.840  1.00157.23           C  
ATOM    295  NE2 GLN   158     -41.210  22.167  21.150  1.00157.23           N  
ATOM    296  OE1 GLN   158     -41.148  20.344  19.790  1.00157.23           O  
ATOM    297  N   TRP   159     -40.016  15.833  22.423  1.00 91.56           N  
ATOM    298  CA  TRP   159     -40.396  14.571  21.858  1.00 91.56           C  
ATOM    299  C   TRP   159     -41.888  14.534  21.927  1.00 91.56           C  
ATOM    300  O   TRP   159     -42.499  15.422  22.518  1.00 91.56           O  
ATOM    301  CB  TRP   159     -39.842  13.315  22.547  1.00 91.56           C  
ATOM    302  CG  TRP   159     -40.449  13.004  23.886  1.00 91.56           C  
ATOM    303  CD1 TRP   159     -41.405  12.087  24.202  1.00 91.56           C  
ATOM    304  CD2 TRP   159     -40.087  13.660  25.107  1.00 91.56           C  
ATOM    305  CE2 TRP   159     -40.851  13.089  26.118  1.00 91.56           C  
ATOM    306  CE3 TRP   159     -39.187  14.658  25.359  1.00 91.56           C  
ATOM    307  NE1 TRP   159     -41.657  12.122  25.554  1.00 91.56           N  
ATOM    308  CZ2 TRP   159     -40.728  13.506  27.413  1.00 91.56           C  
ATOM    309  CZ3 TRP   159     -39.066  15.080  26.663  1.00 91.56           C  
ATOM    310  CH2 TRP   159     -39.822  14.513  27.669  1.00 91.56           C  
ATOM    311  N   ASN   160     -42.530  13.527  21.299  1.00 59.53           N  
ATOM    312  CA  ASN   160     -43.966  13.498  21.305  1.00 59.53           C  
ATOM    313  C   ASN   160     -44.428  12.422  22.235  1.00 59.53           C  
ATOM    314  O   ASN   160     -44.004  11.271  22.144  1.00 59.53           O  
ATOM    315  CB  ASN   160     -44.578  13.253  19.914  1.00 59.53           C  
ATOM    316  CG  ASN   160     -44.305  14.510  19.104  1.00 59.53           C  
ATOM    317  ND2 ASN   160     -43.688  14.354  17.899  1.00 59.53           N  
ATOM    318  OD1 ASN   160     -44.615  15.618  19.543  1.00 59.53           O  
ATOM    319  N   ALA   161     -45.309  12.810  23.175  1.00 66.07           N  
ATOM    320  CA  ALA   161     -45.805  11.956  24.217  1.00 66.07           C  
ATOM    321  C   ALA   161     -46.643  10.839  23.677  1.00 66.07           C  
ATOM    322  O   ALA   161     -46.514   9.700  24.128  1.00 66.07           O  
ATOM    323  CB  ALA   161     -46.685  12.712  25.225  1.00 66.07           C  
ATOM    324  N   ASN   162     -47.554  11.129  22.724  1.00136.39           N  
ATOM    325  CA  ASN   162     -48.381  10.047  22.285  1.00136.39           C  
ATOM    326  C   ASN   162     -48.645  10.153  20.819  1.00136.39           C  
ATOM    327  O   ASN   162     -49.766   9.900  20.383  1.00136.39           O  
ATOM    328  CB  ASN   162     -49.745  10.011  23.008  1.00136.39           C  
ATOM    329  CG  ASN   162     -50.491  11.302  22.704  1.00136.39           C  
ATOM    330  ND2 ASN   162     -51.846  11.213  22.613  1.00136.39           N  
ATOM    331  OD1 ASN   162     -49.889  12.362  22.544  1.00136.39           O  
ATOM    332  N   ALA   163     -47.618  10.474  20.005  1.00 57.62           N  
ATOM    333  CA  ALA   163     -47.864  10.558  18.596  1.00 57.62           C  
ATOM    334  C   ALA   163     -46.615  10.212  17.845  1.00 57.62           C  
ATOM    335  O   ALA   163     -45.494  10.391  18.319  1.00 57.62           O  
ATOM    336  CB  ALA   163     -48.263  11.964  18.123  1.00 57.62           C  
ATOM    337  N   ASN   164     -46.800   9.689  16.625  1.00 59.57           N  
ATOM    338  CA  ASN   164     -45.696   9.421  15.763  1.00 59.57           C  
ATOM    339  C   ASN   164     -45.733  10.571  14.812  1.00 59.57           C  
ATOM    340  O   ASN   164     -46.806  11.014  14.404  1.00 59.57           O  
ATOM    341  CB  ASN   164     -45.851   8.098  14.993  1.00 59.57           C  
ATOM    342  CG  ASN   164     -45.878   6.990  16.039  1.00 59.57           C  
ATOM    343  ND2 ASN   164     -46.929   6.127  15.987  1.00 59.57           N  
ATOM    344  OD1 ASN   164     -44.998   6.905  16.894  1.00 59.57           O  
ATOM    345  N   ALA   165     -44.563  11.124  14.458  1.00 70.25           N  
ATOM    346  CA  ALA   165     -44.607  12.302  13.642  1.00 70.25           C  
ATOM    347  C   ALA   165     -43.915  12.051  12.340  1.00 70.25           C  
ATOM    348  O   ALA   165     -43.080  11.156  12.233  1.00 70.25           O  
ATOM    349  CB  ALA   165     -43.943  13.523  14.302  1.00 70.25           C  
ATOM    350  N   ILE   166     -44.323  12.810  11.300  1.00107.88           N  
ATOM    351  CA  ILE   166     -43.693  12.800  10.004  1.00107.88           C  
ATOM    352  C   ILE   166     -43.364  14.234   9.720  1.00107.88           C  
ATOM    353  O   ILE   166     -44.208  15.113   9.876  1.00107.88           O  
ATOM    354  CB  ILE   166     -44.573  12.314   8.872  1.00107.88           C  
ATOM    355  CG1 ILE   166     -45.779  13.236   8.635  1.00107.88           C  
ATOM    356  CG2 ILE   166     -44.972  10.858   9.150  1.00107.88           C  
ATOM    357  CD1 ILE   166     -46.502  12.924   7.325  1.00107.88           C  
ATOM    358  N   LEU   167     -42.118  14.518   9.289  1.00 80.05           N  
ATOM    359  CA  LEU   167     -41.690  15.879   9.126  1.00 80.05           C  
ATOM    360  C   LEU   167     -41.484  16.146   7.670  1.00 80.05           C  
ATOM    361  O   LEU   167     -40.901  15.338   6.948  1.00 80.05           O  
ATOM    362  CB  LEU   167     -40.313  16.138   9.744  1.00 80.05           C  
ATOM    363  CG  LEU   167     -39.911  17.619   9.745  1.00 80.05           C  
ATOM    364  CD1 LEU   167     -40.511  18.335  10.962  1.00 80.05           C  
ATOM    365  CD2 LEU   167     -38.398  17.809   9.547  1.00 80.05           C  
ATOM    366  N   TYR   168     -41.948  17.319   7.209  1.00 66.29           N  
ATOM    367  CA  TYR   168     -41.787  17.667   5.832  1.00 66.29           C  
ATOM    368  C   TYR   168     -41.233  19.059   5.784  1.00 66.29           C  
ATOM    369  O   TYR   168     -41.712  19.947   6.488  1.00 66.29           O  
ATOM    370  CB  TYR   168     -43.146  17.642   5.116  1.00 66.29           C  
ATOM    371  CG  TYR   168     -42.985  17.935   3.669  1.00 66.29           C  
ATOM    372  CD1 TYR   168     -42.424  17.004   2.827  1.00 66.29           C  
ATOM    373  CD2 TYR   168     -43.428  19.128   3.148  1.00 66.29           C  
ATOM    374  CE1 TYR   168     -42.294  17.265   1.483  1.00 66.29           C  
ATOM    375  CE2 TYR   168     -43.303  19.395   1.804  1.00 66.29           C  
ATOM    376  CZ  TYR   168     -42.736  18.460   0.972  1.00 66.29           C  
ATOM    377  OH  TYR   168     -42.608  18.728  -0.408  1.00 66.29           O  
ATOM    378  N   VAL   169     -40.192  19.288   4.954  1.00 70.06           N  
ATOM    379  CA  VAL   169     -39.624  20.609   4.862  1.00 70.06           C  
ATOM    380  C   VAL   169     -40.185  21.276   3.643  1.00 70.06           C  
ATOM    381  O   VAL   169     -40.030  20.792   2.524  1.00 70.06           O  
ATOM    382  CB  VAL   169     -38.131  20.611   4.723  1.00 70.06           C  
ATOM    383  CG1 VAL   169     -37.685  22.056   4.461  1.00 70.06           C  
ATOM    384  CG2 VAL   169     -37.510  20.000   5.992  1.00 70.06           C  
ATOM    385  N   THR   170     -40.945  22.365   3.851  1.00 79.37           N  
ATOM    386  CA  THR   170     -41.506  23.143   2.782  1.00 79.37           C  
ATOM    387  C   THR   170     -40.531  24.144   2.235  1.00 79.37           C  
ATOM    388  O   THR   170     -40.578  24.485   1.052  1.00 79.37           O  
ATOM    389  CB  THR   170     -42.768  23.839   3.204  1.00 79.37           C  
ATOM    390  CG2 THR   170     -43.787  22.763   3.616  1.00 79.37           C  
ATOM    391  OG1 THR   170     -42.516  24.713   4.292  1.00 79.37           O  
ATOM    392  N   ASP   171     -39.643  24.688   3.100  1.00 79.13           N  
ATOM    393  CA  ASP   171     -38.760  25.733   2.656  1.00 79.13           C  
ATOM    394  C   ASP   171     -37.494  25.763   3.477  1.00 79.13           C  
ATOM    395  O   ASP   171     -37.523  25.737   4.708  1.00 79.13           O  
ATOM    396  CB  ASP   171     -39.393  27.136   2.790  1.00 79.13           C  
ATOM    397  CG  ASP   171     -40.417  27.362   1.683  1.00 79.13           C  
ATOM    398  OD1 ASP   171     -40.016  27.247   0.493  1.00 79.13           O  
ATOM    399  OD2 ASP   171     -41.603  27.657   2.000  1.00 79.13           O1-
ATOM    400  N   GLY   172     -36.332  25.817   2.793  1.00 37.97           N  
ATOM    401  CA  GLY   172     -35.073  26.026   3.460  1.00 37.97           C  
ATOM    402  C   GLY   172     -34.480  24.770   4.023  1.00 37.97           C  
ATOM    403  O   GLY   172     -34.880  23.653   3.699  1.00 37.97           O  
ATOM    404  N   GLU   173     -33.469  24.963   4.905  1.00 69.41           N  
ATOM    405  CA  GLU   173     -32.709  23.888   5.465  1.00 69.41           C  
ATOM    406  C   GLU   173     -32.559  24.084   6.947  1.00 69.41           C  
ATOM    407  O   GLU   173     -32.686  25.198   7.451  1.00 69.41           O  
ATOM    408  CB  GLU   173     -31.287  23.830   4.885  1.00 69.41           C  
ATOM    409  CG  GLU   173     -31.257  23.500   3.395  1.00 69.41           C  
ATOM    410  CD  GLU   173     -29.809  23.259   3.020  1.00 69.41           C  
ATOM    411  OE1 GLU   173     -28.919  23.768   3.757  1.00 69.41           O  
ATOM    412  OE2 GLU   173     -29.568  22.554   2.003  1.00 69.41           O1-
ATOM    413  N   ALA   174     -32.312  22.979   7.689  1.00 42.98           N  
ATOM    414  CA  ALA   174     -32.088  23.057   9.107  1.00 42.98           C  
ATOM    415  C   ALA   174     -31.275  21.865   9.516  1.00 42.98           C  
ATOM    416  O   ALA   174     -31.288  20.838   8.835  1.00 42.98           O  
ATOM    417  CB  ALA   174     -33.384  23.015   9.940  1.00 42.98           C  
ATOM    418  N   GLN   175     -30.521  21.969  10.642  1.00117.62           N  
ATOM    419  CA  GLN   175     -29.788  20.808  11.072  1.00117.62           C  
ATOM    420  C   GLN   175     -30.527  20.193  12.216  1.00117.62           C  
ATOM    421  O   GLN   175     -30.898  20.875  13.170  1.00117.62           O  
ATOM    422  CB  GLN   175     -28.362  21.037  11.615  1.00117.62           C  
ATOM    423  CG  GLN   175     -27.360  21.579  10.600  1.00117.62           C  
ATOM    424  CD  GLN   175     -25.981  21.064  10.992  1.00117.62           C  
ATOM    425  NE2 GLN   175     -25.832  20.642  12.277  1.00117.62           N  
ATOM    426  OE1 GLN   175     -25.071  20.999  10.167  1.00117.62           O  
ATOM    427  N   ILE   176     -30.743  18.866  12.161  1.00106.44           N  
ATOM    428  CA  ILE   176     -31.490  18.264  13.228  1.00106.44           C  
ATOM    429  C   ILE   176     -30.798  17.045  13.760  1.00106.44           C  
ATOM    430  O   ILE   176     -30.026  16.376  13.071  1.00106.44           O  
ATOM    431  CB  ILE   176     -32.868  17.838  12.829  1.00106.44           C  
ATOM    432  CG1 ILE   176     -32.803  16.702  11.803  1.00106.44           C  
ATOM    433  CG2 ILE   176     -33.617  19.079  12.311  1.00106.44           C  
ATOM    434  CD1 ILE   176     -34.155  16.023  11.609  1.00106.44           C  
ATOM    435  N   GLN   177     -31.063  16.757  15.052  1.00 72.08           N  
ATOM    436  CA  GLN   177     -30.557  15.581  15.697  1.00 72.08           C  
ATOM    437  C   GLN   177     -31.733  14.868  16.288  1.00 72.08           C  
ATOM    438  O   GLN   177     -32.550  15.468  16.988  1.00 72.08           O  
ATOM    439  CB  GLN   177     -29.650  15.849  16.912  1.00 72.08           C  
ATOM    440  CG  GLN   177     -28.392  16.665  16.632  1.00 72.08           C  
ATOM    441  CD  GLN   177     -27.467  16.472  17.831  1.00 72.08           C  
ATOM    442  NE2 GLN   177     -27.608  17.343  18.864  1.00 72.08           N  
ATOM    443  OE1 GLN   177     -26.646  15.557  17.849  1.00 72.08           O  
ATOM    444  N   ILE   178     -31.857  13.556  16.012  1.00106.54           N  
ATOM    445  CA  ILE   178     -32.901  12.795  16.619  1.00106.54           C  
ATOM    446  C   ILE   178     -32.269  11.673  17.374  1.00106.54           C  
ATOM    447  O   ILE   178     -31.384  10.979  16.874  1.00106.54           O  
ATOM    448  CB  ILE   178     -33.953  12.310  15.656  1.00106.54           C  
ATOM    449  CG1 ILE   178     -33.322  11.497  14.517  1.00106.54           C  
ATOM    450  CG2 ILE   178     -34.785  13.519  15.205  1.00106.54           C  
ATOM    451  CD1 ILE   178     -34.339  10.886  13.551  1.00106.54           C  
ATOM    452  N   VAL   179     -32.693  11.497  18.641  1.00106.18           N  
ATOM    453  CA  VAL   179     -32.068  10.488  19.431  1.00106.18           C  
ATOM    454  C   VAL   179     -33.122   9.552  19.911  1.00106.18           C  
ATOM    455  O   VAL   179     -34.268   9.918  20.163  1.00106.18           O  
ATOM    456  CB  VAL   179     -31.326  11.032  20.620  1.00106.18           C  
ATOM    457  CG1 VAL   179     -32.317  11.248  21.771  1.00106.18           C  
ATOM    458  CG2 VAL   179     -30.149  10.100  20.936  1.00106.18           C  
ATOM    459  N   ASN   180     -32.712   8.286  20.021  1.00170.61           N  
ATOM    460  CA  ASN   180     -33.466   7.123  20.363  1.00170.61           C  
ATOM    461  C   ASN   180     -33.483   6.978  21.867  1.00170.61           C  
ATOM    462  O   ASN   180     -32.919   7.800  22.586  1.00170.61           O  
ATOM    463  CB  ASN   180     -32.701   5.947  19.737  1.00170.61           C  
ATOM    464  CG  ASN   180     -33.458   4.657  19.822  1.00170.61           C  
ATOM    465  ND2 ASN   180     -32.943   3.728  20.667  1.00170.61           N  
ATOM    466  OD1 ASN   180     -34.450   4.457  19.124  1.00170.61           O  
ATOM    467  N   ASP   181     -34.218   5.965  22.386  1.00 57.72           N  
ATOM    468  CA  ASP   181     -34.283   5.648  23.793  1.00 57.72           C  
ATOM    469  C   ASP   181     -32.973   5.059  24.214  1.00 57.72           C  
ATOM    470  O   ASP   181     -32.535   5.213  25.355  1.00 57.72           O  
ATOM    471  CB  ASP   181     -35.373   4.628  24.157  1.00 57.72           C  
ATOM    472  CG  ASP   181     -35.059   3.332  23.424  1.00 57.72           C  
ATOM    473  OD1 ASP   181     -35.109   3.336  22.165  1.00 57.72           O  
ATOM    474  OD2 ASP   181     -34.750   2.324  24.113  1.00 57.72           O1-
ATOM    475  N   ASN   182     -32.341   4.336  23.271  1.00 58.98           N  
ATOM    476  CA  ASN   182     -31.090   3.663  23.460  1.00 58.98           C  
ATOM    477  C   ASN   182     -30.079   4.726  23.725  1.00 58.98           C  
ATOM    478  O   ASN   182     -29.083   4.492  24.405  1.00 58.98           O  
ATOM    479  CB  ASN   182     -30.640   2.860  22.224  1.00 58.98           C  
ATOM    480  CG  ASN   182     -29.618   1.830  22.686  1.00 58.98           C  
ATOM    481  ND2 ASN   182     -28.596   1.535  21.841  1.00 58.98           N  
ATOM    482  OD1 ASN   182     -29.723   1.289  23.785  1.00 58.98           O  
ATOM    483  N   GLY   183     -30.313   5.939  23.189  1.00 26.96           N  
ATOM    484  CA  GLY   183     -29.370   6.991  23.405  1.00 26.96           C  
ATOM    485  C   GLY   183     -28.549   7.095  22.166  1.00 26.96           C  
ATOM    486  O   GLY   183     -27.585   7.855  22.109  1.00 26.96           O  
ATOM    487  N   ASN   184     -28.918   6.298  21.146  1.00 70.05           N  
ATOM    488  CA  ASN   184     -28.241   6.327  19.883  1.00 70.05           C  
ATOM    489  C   ASN   184     -28.745   7.509  19.115  1.00 70.05           C  
ATOM    490  O   ASN   184     -29.893   7.927  19.266  1.00 70.05           O  
ATOM    491  CB  ASN   184     -28.496   5.070  19.031  1.00 70.05           C  
ATOM    492  CG  ASN   184     -27.632   3.927  19.557  1.00 70.05           C  
ATOM    493  ND2 ASN   184     -26.377   4.238  19.978  1.00 70.05           N  
ATOM    494  OD1 ASN   184     -28.052   2.774  19.561  1.00 70.05           O  
ATOM    495  N   ARG   185     -27.863   8.092  18.275  1.00121.50           N  
ATOM    496  CA  ARG   185     -28.251   9.214  17.477  1.00121.50           C  
ATOM    497  C   ARG   185     -28.623   8.627  16.156  1.00121.50           C  
ATOM    498  O   ARG   185     -27.758   8.205  15.390  1.00121.50           O  
ATOM    499  CB  ARG   185     -27.108  10.200  17.213  1.00121.50           C  
ATOM    500  CG  ARG   185     -27.622  11.585  16.832  1.00121.50           C  
ATOM    501  CD  ARG   185     -26.650  12.402  15.987  1.00121.50           C  
ATOM    502  NE  ARG   185     -25.336  12.481  16.689  1.00121.50           N  
ATOM    503  CZ  ARG   185     -24.283  11.722  16.262  1.00121.50           C  
ATOM    504  NH1 ARG   185     -24.441  10.821  15.249  1.00121.50           N1+
ATOM    505  NH2 ARG   185     -23.056  11.888  16.832  1.00121.50           N  
ATOM    506  N   VAL   186     -29.934   8.527  15.884  1.00 74.63           N  
ATOM    507  CA  VAL   186     -30.374   7.961  14.648  1.00 74.63           C  
ATOM    508  C   VAL   186     -30.194   8.912  13.507  1.00 74.63           C  
ATOM    509  O   VAL   186     -29.994   8.471  12.380  1.00 74.63           O  
ATOM    510  CB  VAL   186     -31.796   7.489  14.656  1.00 74.63           C  
ATOM    511  CG1 VAL   186     -31.918   6.292  15.616  1.00 74.63           C  
ATOM    512  CG2 VAL   186     -32.688   8.673  15.022  1.00 74.63           C  
ATOM    513  N   PHE   187     -30.315  10.234  13.733  1.00 83.92           N  
ATOM    514  CA  PHE   187     -30.203  11.115  12.609  1.00 83.92           C  
ATOM    515  C   PHE   187     -29.445  12.328  13.038  1.00 83.92           C  
ATOM    516  O   PHE   187     -29.619  12.829  14.148  1.00 83.92           O  
ATOM    517  CB  PHE   187     -31.599  11.564  12.130  1.00 83.92           C  
ATOM    518  CG  PHE   187     -31.554  12.298  10.832  1.00 83.92           C  
ATOM    519  CD1 PHE   187     -31.587  11.609   9.644  1.00 83.92           C  
ATOM    520  CD2 PHE   187     -31.514  13.674  10.807  1.00 83.92           C  
ATOM    521  CE1 PHE   187     -31.562  12.287   8.449  1.00 83.92           C  
ATOM    522  CE2 PHE   187     -31.488  14.358   9.616  1.00 83.92           C  
ATOM    523  CZ  PHE   187     -31.514  13.662   8.431  1.00 83.92           C  
ATOM    524  N   ASP   188     -28.554  12.815  12.157  1.00 81.11           N  
ATOM    525  CA  ASP   188     -27.805  13.993  12.466  1.00 81.11           C  
ATOM    526  C   ASP   188     -27.415  14.566  11.145  1.00 81.11           C  
ATOM    527  O   ASP   188     -26.492  14.063  10.504  1.00 81.11           O  
ATOM    528  CB  ASP   188     -26.517  13.694  13.248  1.00 81.11           C  
ATOM    529  CG  ASP   188     -26.098  14.984  13.927  1.00 81.11           C  
ATOM    530  OD1 ASP   188     -26.996  15.643  14.511  1.00 81.11           O  
ATOM    531  OD2 ASP   188     -24.886  15.327  13.895  1.00 81.11           O1-
ATOM    532  N   GLY   189     -28.107  15.624  10.686  1.00 34.02           N  
ATOM    533  CA  GLY   189     -27.707  16.128   9.407  1.00 34.02           C  
ATOM    534  C   GLY   189     -28.703  17.119   8.907  1.00 34.02           C  
ATOM    535  O   GLY   189     -29.666  17.479   9.586  1.00 34.02           O  
ATOM    536  N   GLN   190     -28.472  17.571   7.663  1.00 72.37           N  
ATOM    537  CA  GLN   190     -29.265  18.608   7.088  1.00 72.37           C  
ATOM    538  C   GLN   190     -30.498  18.012   6.479  1.00 72.37           C  
ATOM    539  O   GLN   190     -30.499  16.868   6.025  1.00 72.37           O  
ATOM    540  CB  GLN   190     -28.507  19.386   5.997  1.00 72.37           C  
ATOM    541  CG  GLN   190     -28.936  20.849   5.896  1.00 72.37           C  
ATOM    542  CD  GLN   190     -28.309  21.509   7.113  1.00 72.37           C  
ATOM    543  NE2 GLN   190     -28.233  22.866   7.131  1.00 72.37           N  
ATOM    544  OE1 GLN   190     -27.881  20.814   8.032  1.00 72.37           O  
ATOM    545  N   VAL   191     -31.601  18.783   6.510  1.00132.84           N  
ATOM    546  CA  VAL   191     -32.843  18.408   5.897  1.00132.84           C  
ATOM    547  C   VAL   191     -33.317  19.604   5.142  1.00132.84           C  
ATOM    548  O   VAL   191     -33.325  20.718   5.664  1.00132.84           O  
ATOM    549  CB  VAL   191     -33.909  17.998   6.873  1.00132.84           C  
ATOM    550  CG1 VAL   191     -33.611  16.581   7.369  1.00132.84           C  
ATOM    551  CG2 VAL   191     -33.898  19.005   8.031  1.00132.84           C  
ATOM    552  N   SER   192     -33.762  19.399   3.889  1.00104.07           N  
ATOM    553  CA  SER   192     -34.070  20.529   3.066  1.00104.07           C  
ATOM    554  C   SER   192     -35.410  20.318   2.426  1.00104.07           C  
ATOM    555  O   SER   192     -36.066  19.302   2.650  1.00104.07           O  
ATOM    556  CB  SER   192     -33.011  20.711   1.959  1.00104.07           C  
ATOM    557  OG  SER   192     -33.280  21.849   1.157  1.00104.07           O  
ATOM    558  N   GLN   193     -35.837  21.291   1.596  1.00104.14           N  
ATOM    559  CA  GLN   193     -37.144  21.307   0.998  1.00104.14           C  
ATOM    560  C   GLN   193     -37.427  20.029   0.275  1.00104.14           C  
ATOM    561  O   GLN   193     -36.614  19.523  -0.498  1.00104.14           O  
ATOM    562  CB  GLN   193     -37.354  22.452  -0.011  1.00104.14           C  
ATOM    563  CG  GLN   193     -37.314  23.854   0.595  1.00104.14           C  
ATOM    564  CD  GLN   193     -37.640  24.835  -0.521  1.00104.14           C  
ATOM    565  NE2 GLN   193     -38.253  24.318  -1.620  1.00104.14           N  
ATOM    566  OE1 GLN   193     -37.358  26.028  -0.419  1.00104.14           O  
ATOM    567  N   GLY   194     -38.627  19.468   0.524  1.00 29.61           N  
ATOM    568  CA  GLY   194     -39.056  18.288  -0.167  1.00 29.61           C  
ATOM    569  C   GLY   194     -38.595  17.051   0.542  1.00 29.61           C  
ATOM    570  O   GLY   194     -38.828  15.942   0.066  1.00 29.61           O  
ATOM    571  N   GLN   195     -37.937  17.182   1.703  1.00 69.44           N  
ATOM    572  CA  GLN   195     -37.469  15.995   2.363  1.00 69.44           C  
ATOM    573  C   GLN   195     -38.359  15.707   3.534  1.00 69.44           C  
ATOM    574  O   GLN   195     -38.924  16.614   4.141  1.00 69.44           O  
ATOM    575  CB  GLN   195     -36.014  16.140   2.828  1.00 69.44           C  
ATOM    576  CG  GLN   195     -35.059  16.271   1.637  1.00 69.44           C  
ATOM    577  CD  GLN   195     -33.721  16.813   2.116  1.00 69.44           C  
ATOM    578  NE2 GLN   195     -33.251  17.899   1.445  1.00 69.44           N  
ATOM    579  OE1 GLN   195     -33.112  16.301   3.054  1.00 69.44           O  
ATOM    580  N   LEU   196     -38.506  14.403   3.861  1.00 58.35           N  
ATOM    581  CA  LEU   196     -39.398  13.953   4.893  1.00 58.35           C  
ATOM    582  C   LEU   196     -38.598  13.186   5.907  1.00 58.35           C  
ATOM    583  O   LEU   196     -37.762  12.354   5.555  1.00 58.35           O  
ATOM    584  CB  LEU   196     -40.456  12.985   4.315  1.00 58.35           C  
ATOM    585  CG  LEU   196     -41.575  12.518   5.267  1.00 58.35           C  
ATOM    586  CD1 LEU   196     -42.581  13.647   5.555  1.00 58.35           C  
ATOM    587  CD2 LEU   196     -42.240  11.233   4.744  1.00 58.35           C  
ATOM    588  N   ILE   197     -38.818  13.459   7.207  1.00133.37           N  
ATOM    589  CA  ILE   197     -38.129  12.696   8.204  1.00133.37           C  
ATOM    590  C   ILE   197     -39.151  12.141   9.142  1.00133.37           C  
ATOM    591  O   ILE   197     -40.151  12.788   9.446  1.00133.37           O  
ATOM    592  CB  ILE   197     -37.154  13.461   9.038  1.00133.37           C  
ATOM    593  CG1 ILE   197     -36.254  12.468   9.785  1.00133.37           C  
ATOM    594  CG2 ILE   197     -37.954  14.370   9.982  1.00133.37           C  
ATOM    595  CD1 ILE   197     -35.425  11.586   8.852  1.00133.37           C  
ATOM    596  N   ALA   198     -38.926  10.909   9.631  1.00 42.82           N  
ATOM    597  CA  ALA   198     -39.920  10.326  10.481  1.00 42.82           C  
ATOM    598  C   ALA   198     -39.395  10.290  11.887  1.00 42.82           C  
ATOM    599  O   ALA   198     -38.262   9.873  12.119  1.00 42.82           O  
ATOM    600  CB  ALA   198     -40.275   8.890  10.069  1.00 42.82           C  
ATOM    601  N   VAL   199     -40.212  10.760  12.862  1.00 67.99           N  
ATOM    602  CA  VAL   199     -39.810  10.713  14.245  1.00 67.99           C  
ATOM    603  C   VAL   199     -40.862   9.996  15.034  1.00 67.99           C  
ATOM    604  O   VAL   199     -41.983  10.465  15.231  1.00 67.99           O  
ATOM    605  CB  VAL   199     -39.590  12.062  14.876  1.00 67.99           C  
ATOM    606  CG1 VAL   199     -39.201  11.843  16.350  1.00 67.99           C  
ATOM    607  CG2 VAL   199     -38.528  12.826  14.068  1.00 67.99           C  
ATOM    608  N   PRO   200     -40.472   8.858  15.524  1.00 86.02           N  
ATOM    609  CA  PRO   200     -41.366   7.997  16.252  1.00 86.02           C  
ATOM    610  C   PRO   200     -41.609   8.530  17.627  1.00 86.02           C  
ATOM    611  O   PRO   200     -40.776   9.276  18.138  1.00 86.02           O  
ATOM    612  CB  PRO   200     -40.687   6.629  16.275  1.00 86.02           C  
ATOM    613  CG  PRO   200     -39.764   6.639  15.044  1.00 86.02           C  
ATOM    614  CD  PRO   200     -39.410   8.118  14.853  1.00 86.02           C  
ATOM    615  N   GLN   201     -42.731   8.119  18.242  1.00 65.21           N  
ATOM    616  CA  GLN   201     -43.133   8.533  19.557  1.00 65.21           C  
ATOM    617  C   GLN   201     -42.032   8.207  20.527  1.00 65.21           C  
ATOM    618  O   GLN   201     -41.632   7.053  20.661  1.00 65.21           O  
ATOM    619  CB  GLN   201     -44.389   7.756  19.989  1.00 65.21           C  
ATOM    620  CG  GLN   201     -44.982   8.136  21.342  1.00 65.21           C  
ATOM    621  CD  GLN   201     -46.190   7.230  21.555  1.00 65.21           C  
ATOM    622  NE2 GLN   201     -46.290   6.150  20.734  1.00 65.21           N  
ATOM    623  OE1 GLN   201     -47.017   7.474  22.430  1.00 65.21           O  
ATOM    624  N   GLY   202     -41.527   9.239  21.242  1.00 35.52           N  
ATOM    625  CA  GLY   202     -40.509   9.067  22.248  1.00 35.52           C  
ATOM    626  C   GLY   202     -39.171   9.534  21.744  1.00 35.52           C  
ATOM    627  O   GLY   202     -38.325   9.949  22.534  1.00 35.52           O  
ATOM    628  N   PHE   203     -38.933   9.484  20.419  1.00 83.27           N  
ATOM    629  CA  PHE   203     -37.677   9.965  19.910  1.00 83.27           C  
ATOM    630  C   PHE   203     -37.660  11.439  20.161  1.00 83.27           C  
ATOM    631  O   PHE   203     -38.695  12.100  20.068  1.00 83.27           O  
ATOM    632  CB  PHE   203     -37.492   9.732  18.397  1.00 83.27           C  
ATOM    633  CG  PHE   203     -37.201   8.283  18.200  1.00 83.27           C  
ATOM    634  CD1 PHE   203     -38.193   7.339  18.321  1.00 83.27           C  
ATOM    635  CD2 PHE   203     -35.928   7.865  17.879  1.00 83.27           C  
ATOM    636  CE1 PHE   203     -37.917   6.002  18.140  1.00 83.27           C  
ATOM    637  CE2 PHE   203     -35.646   6.532  17.696  1.00 83.27           C  
ATOM    638  CZ  PHE   203     -36.643   5.597  17.823  1.00 83.27           C  
ATOM    639  N   SER   204     -36.477  11.989  20.510  1.00100.78           N  
ATOM    640  CA  SER   204     -36.404  13.385  20.839  1.00100.78           C  
ATOM    641  C   SER   204     -35.651  14.095  19.755  1.00100.78           C  
ATOM    642  O   SER   204     -34.622  13.621  19.271  1.00100.78           O  
ATOM    643  CB  SER   204     -35.728  13.653  22.191  1.00100.78           C  
ATOM    644  OG  SER   204     -36.502  13.073  23.230  1.00100.78           O  
ATOM    645  N   VAL   205     -36.165  15.284  19.373  1.00136.29           N  
ATOM    646  CA  VAL   205     -35.661  16.018  18.249  1.00136.29           C  
ATOM    647  C   VAL   205     -35.172  17.378  18.628  1.00136.29           C  
ATOM    648  O   VAL   205     -35.705  18.047  19.513  1.00136.29           O  
ATOM    649  CB  VAL   205     -36.726  16.336  17.252  1.00136.29           C  
ATOM    650  CG1 VAL   205     -37.141  15.078  16.489  1.00136.29           C  
ATOM    651  CG2 VAL   205     -37.887  16.943  18.057  1.00136.29           C  
ATOM    652  N   VAL   206     -34.115  17.805  17.914  1.00111.48           N  
ATOM    653  CA  VAL   206     -33.615  19.145  17.985  1.00111.48           C  
ATOM    654  C   VAL   206     -33.439  19.571  16.558  1.00111.48           C  
ATOM    655  O   VAL   206     -33.023  18.780  15.712  1.00111.48           O  
ATOM    656  CB  VAL   206     -32.271  19.290  18.630  1.00111.48           C  
ATOM    657  CG1 VAL   206     -31.249  18.500  17.799  1.00111.48           C  
ATOM    658  CG2 VAL   206     -31.939  20.790  18.721  1.00111.48           C  
ATOM    659  N   LYS   207     -33.774  20.839  16.258  1.00146.91           N  
ATOM    660  CA  LYS   207     -33.663  21.332  14.916  1.00146.91           C  
ATOM    661  C   LYS   207     -33.267  22.780  14.968  1.00146.91           C  
ATOM    662  O   LYS   207     -33.852  23.567  15.711  1.00146.91           O  
ATOM    663  CB  LYS   207     -34.976  21.104  14.127  1.00146.91           C  
ATOM    664  CG  LYS   207     -36.224  20.922  15.014  1.00146.91           C  
ATOM    665  CD  LYS   207     -37.539  20.759  14.235  1.00146.91           C  
ATOM    666  CE  LYS   207     -38.625  19.954  14.968  1.00146.91           C  
ATOM    667  NZ  LYS   207     -39.375  20.804  15.922  1.00146.91           N1+
ATOM    668  N   ARG   208     -32.226  23.150  14.186  1.00110.54           N  
ATOM    669  CA  ARG   208     -31.707  24.490  14.136  1.00110.54           C  
ATOM    670  C   ARG   208     -31.859  24.960  12.712  1.00110.54           C  
ATOM    671  O   ARG   208     -31.554  24.218  11.781  1.00110.54           O  
ATOM    672  CB  ARG   208     -30.206  24.523  14.489  1.00110.54           C  
ATOM    673  CG  ARG   208     -29.648  25.916  14.777  1.00110.54           C  
ATOM    674  CD  ARG   208     -28.120  25.987  14.672  1.00110.54           C  
ATOM    675  NE  ARG   208     -27.806  26.628  13.362  1.00110.54           N  
ATOM    676  CZ  ARG   208     -26.798  26.159  12.569  1.00110.54           C  
ATOM    677  NH1 ARG   208     -26.072  25.064  12.943  1.00110.54           N1+
ATOM    678  NH2 ARG   208     -26.524  26.785  11.387  1.00110.54           N  
ATOM    679  N   ALA   209     -32.353  26.197  12.491  1.00 70.36           N  
ATOM    680  CA  ALA   209     -32.573  26.648  11.135  1.00 70.36           C  
ATOM    681  C   ALA   209     -31.274  27.106  10.535  1.00 70.36           C  
ATOM    682  O   ALA   209     -30.527  27.854  11.164  1.00 70.36           O  
ATOM    683  CB  ALA   209     -33.580  27.811  11.033  1.00 70.36           C  
ATOM    684  N   THR   210     -30.907  26.543   9.360  1.00164.14           N  
ATOM    685  CA  THR   210     -29.709  26.926   8.649  1.00164.14           C  
ATOM    686  C   THR   210     -29.888  27.960   7.557  1.00164.14           C  
ATOM    687  O   THR   210     -29.043  28.838   7.393  1.00164.14           O  
ATOM    688  CB  THR   210     -28.939  25.768   8.091  1.00164.14           C  
ATOM    689  CG2 THR   210     -29.511  25.400   6.714  1.00164.14           C  
ATOM    690  OG1 THR   210     -27.575  26.137   7.947  1.00164.14           O  
ATOM    691  N   SER   211     -30.971  27.865   6.742  1.00 63.29           N  
ATOM    692  CA  SER   211     -31.156  28.796   5.652  1.00 63.29           C  
ATOM    693  C   SER   211     -31.838  29.981   6.237  1.00 63.29           C  
ATOM    694  O   SER   211     -32.148  29.946   7.425  1.00 63.29           O  
ATOM    695  CB  SER   211     -31.992  28.290   4.456  1.00 63.29           C  
ATOM    696  OG  SER   211     -33.362  28.150   4.807  1.00 63.29           O  
ATOM    697  N   ASN   212     -32.120  31.029   5.422  1.00 68.36           N  
ATOM    698  CA  ASN   212     -32.647  32.265   5.943  1.00 68.36           C  
ATOM    699  C   ASN   212     -33.851  31.970   6.767  1.00 68.36           C  
ATOM    700  O   ASN   212     -33.934  32.406   7.914  1.00 68.36           O  
ATOM    701  CB  ASN   212     -33.144  33.252   4.873  1.00 68.36           C  
ATOM    702  CG  ASN   212     -31.967  34.015   4.286  1.00 68.36           C  
ATOM    703  ND2 ASN   212     -30.794  33.942   4.967  1.00 68.36           N  
ATOM    704  OD1 ASN   212     -32.092  34.671   3.253  1.00 68.36           O  
ATOM    705  N   ARG   213     -34.809  31.208   6.215  1.00 80.85           N  
ATOM    706  CA  ARG   213     -35.946  30.871   7.010  1.00 80.85           C  
ATOM    707  C   ARG   213     -36.207  29.406   6.816  1.00 80.85           C  
ATOM    708  O   ARG   213     -36.084  28.883   5.710  1.00 80.85           O  
ATOM    709  CB  ARG   213     -37.214  31.635   6.598  1.00 80.85           C  
ATOM    710  CG  ARG   213     -38.385  31.405   7.548  1.00 80.85           C  
ATOM    711  CD  ARG   213     -39.666  32.139   7.145  1.00 80.85           C  
ATOM    712  NE  ARG   213     -39.509  33.593   7.451  1.00 80.85           N  
ATOM    713  CZ  ARG   213     -39.859  34.075   8.684  1.00 80.85           C  
ATOM    714  NH1 ARG   213     -40.232  33.215   9.674  1.00 80.85           N1+
ATOM    715  NH2 ARG   213     -39.844  35.417   8.929  1.00 80.85           N  
ATOM    716  N   PHE   214     -36.573  28.699   7.902  1.00 70.13           N  
ATOM    717  CA  PHE   214     -36.821  27.290   7.873  1.00 70.13           C  
ATOM    718  C   PHE   214     -38.294  27.102   8.093  1.00 70.13           C  
ATOM    719  O   PHE   214     -38.872  27.665   9.023  1.00 70.13           O  
ATOM    720  CB  PHE   214     -35.999  26.578   8.975  1.00 70.13           C  
ATOM    721  CG  PHE   214     -36.253  25.112   8.964  1.00 70.13           C  
ATOM    722  CD1 PHE   214     -35.834  24.318   7.921  1.00 70.13           C  
ATOM    723  CD2 PHE   214     -36.883  24.531  10.037  1.00 70.13           C  
ATOM    724  CE1 PHE   214     -36.073  22.964   7.938  1.00 70.13           C  
ATOM    725  CE2 PHE   214     -37.120  23.180  10.060  1.00 70.13           C  
ATOM    726  CZ  PHE   214     -36.725  22.394   9.006  1.00 70.13           C  
ATOM    727  N   GLN   215     -38.961  26.321   7.212  1.00 70.90           N  
ATOM    728  CA  GLN   215     -40.381  26.161   7.347  1.00 70.90           C  
ATOM    729  C   GLN   215     -40.708  24.720   7.103  1.00 70.90           C  
ATOM    730  O   GLN   215     -40.163  24.097   6.191  1.00 70.90           O  
ATOM    731  CB  GLN   215     -41.120  27.013   6.318  1.00 70.90           C  
ATOM    732  CG  GLN   215     -40.691  28.474   6.427  1.00 70.90           C  
ATOM    733  CD  GLN   215     -41.187  29.183   5.182  1.00 70.90           C  
ATOM    734  NE2 GLN   215     -40.279  29.933   4.506  1.00 70.90           N  
ATOM    735  OE1 GLN   215     -42.353  29.056   4.817  1.00 70.90           O  
ATOM    736  N   TRP   216     -41.618  24.142   7.918  1.00 86.75           N  
ATOM    737  CA  TRP   216     -41.883  22.745   7.742  1.00 86.75           C  
ATOM    738  C   TRP   216     -43.260  22.446   8.250  1.00 86.75           C  
ATOM    739  O   TRP   216     -43.879  23.270   8.923  1.00 86.75           O  
ATOM    740  CB  TRP   216     -40.927  21.865   8.564  1.00 86.75           C  
ATOM    741  CG  TRP   216     -41.177  21.897  10.060  1.00 86.75           C  
ATOM    742  CD1 TRP   216     -41.829  20.968  10.814  1.00 86.75           C  
ATOM    743  CD2 TRP   216     -40.787  22.945  10.967  1.00 86.75           C  
ATOM    744  CE2 TRP   216     -41.226  22.577  12.237  1.00 86.75           C  
ATOM    745  CE3 TRP   216     -40.124  24.121  10.760  1.00 86.75           C  
ATOM    746  NE1 TRP   216     -41.861  21.359  12.129  1.00 86.75           N  
ATOM    747  CZ2 TRP   216     -41.013  23.376  13.327  1.00 86.75           C  
ATOM    748  CZ3 TRP   216     -39.904  24.919  11.860  1.00 86.75           C  
ATOM    749  CH2 TRP   216     -40.338  24.558  13.117  1.00 86.75           C  
ATOM    750  N   VAL   217     -43.784  21.251   7.901  1.00112.59           N  
ATOM    751  CA  VAL   217     -45.053  20.835   8.430  1.00112.59           C  
ATOM    752  C   VAL   217     -44.883  19.456   8.990  1.00112.59           C  
ATOM    753  O   VAL   217     -44.260  18.587   8.380  1.00112.59           O  
ATOM    754  CB  VAL   217     -46.177  20.795   7.425  1.00112.59           C  
ATOM    755  CG1 VAL   217     -46.399  22.217   6.881  1.00112.59           C  
ATOM    756  CG2 VAL   217     -45.870  19.737   6.353  1.00112.59           C  
ATOM    757  N   GLU   218     -45.442  19.224  10.195  1.00 64.54           N  
ATOM    758  CA  GLU   218     -45.334  17.945  10.840  1.00 64.54           C  
ATOM    759  C   GLU   218     -46.710  17.368  10.939  1.00 64.54           C  
ATOM    760  O   GLU   218     -47.654  18.072  11.296  1.00 64.54           O  
ATOM    761  CB  GLU   218     -44.831  18.041  12.290  1.00 64.54           C  
ATOM    762  CG  GLU   218     -43.436  18.645  12.425  1.00 64.54           C  
ATOM    763  CD  GLU   218     -43.112  18.700  13.907  1.00 64.54           C  
ATOM    764  OE1 GLU   218     -43.792  17.978  14.684  1.00 64.54           O  
ATOM    765  OE2 GLU   218     -42.181  19.464  14.283  1.00 64.54           O1-
ATOM    766  N   PHE   219     -46.859  16.069  10.604  1.00122.12           N  
ATOM    767  CA  PHE   219     -48.118  15.393  10.755  1.00122.12           C  
ATOM    768  C   PHE   219     -47.965  14.401  11.869  1.00122.12           C  
ATOM    769  O   PHE   219     -47.068  13.563  11.861  1.00122.12           O  
ATOM    770  CB  PHE   219     -48.612  14.661   9.487  1.00122.12           C  
ATOM    771  CG  PHE   219     -49.327  15.636   8.607  1.00122.12           C  
ATOM    772  CD1 PHE   219     -48.623  16.497   7.800  1.00122.12           C  
ATOM    773  CD2 PHE   219     -50.704  15.697   8.602  1.00122.12           C  
ATOM    774  CE1 PHE   219     -49.270  17.400   6.992  1.00122.12           C  
ATOM    775  CE2 PHE   219     -51.359  16.596   7.794  1.00122.12           C  
ATOM    776  CZ  PHE   219     -50.642  17.447   6.987  1.00122.12           C  
ATOM    777  N   LYS   220     -48.860  14.477  12.869  1.00107.61           N  
ATOM    778  CA  LYS   220     -48.759  13.638  14.029  1.00107.61           C  
ATOM    779  C   LYS   220     -49.898  12.667  14.023  1.00107.61           C  
ATOM    780  O   LYS   220     -50.955  12.927  13.462  1.00107.61           O  
ATOM    781  CB  LYS   220     -48.846  14.452  15.318  1.00107.61           C  
ATOM    782  CG  LYS   220     -47.728  15.484  15.362  1.00107.61           C  
ATOM    783  CD  LYS   220     -47.930  16.562  16.415  1.00107.61           C  
ATOM    784  CE  LYS   220     -46.717  17.476  16.542  1.00107.61           C  
ATOM    785  NZ  LYS   220     -45.548  16.683  16.978  1.00107.61           N1+
ATOM    786  N   THR   221     -49.675  11.497  14.646  1.00112.86           N  
ATOM    787  CA  THR   221     -50.581  10.384  14.725  1.00112.86           C  
ATOM    788  C   THR   221     -51.655  10.526  15.755  1.00112.86           C  
ATOM    789  O   THR   221     -52.303   9.520  16.034  1.00112.86           O  
ATOM    790  CB  THR   221     -49.959   9.046  14.964  1.00112.86           C  
ATOM    791  CG2 THR   221     -48.980   8.742  13.820  1.00112.86           C  
ATOM    792  OG1 THR   221     -49.323   9.021  16.229  1.00112.86           O  
ATOM    793  N   ASN   222     -51.764  11.655  16.486  1.00 70.88           N  
ATOM    794  CA  ASN   222     -52.820  11.731  17.471  1.00 70.88           C  
ATOM    795  C   ASN   222     -53.681  12.941  17.176  1.00 70.88           C  
ATOM    796  O   ASN   222     -53.193  13.952  16.679  1.00 70.88           O  
ATOM    797  CB  ASN   222     -52.267  11.842  18.910  1.00 70.88           C  
ATOM    798  CG  ASN   222     -53.296  11.306  19.899  1.00 70.88           C  
ATOM    799  ND2 ASN   222     -53.110  10.025  20.326  1.00 70.88           N  
ATOM    800  OD1 ASN   222     -54.241  11.994  20.281  1.00 70.88           O  
ATOM    801  N   ALA   223     -54.997  12.873  17.492  1.00 45.24           N  
ATOM    802  CA  ALA   223     -55.902  13.954  17.204  1.00 45.24           C  
ATOM    803  C   ALA   223     -55.390  15.169  17.916  1.00 45.24           C  
ATOM    804  O   ALA   223     -55.425  16.271  17.369  1.00 45.24           O  
ATOM    805  CB  ALA   223     -57.328  13.693  17.724  1.00 45.24           C  
ATOM    806  N   ASN   224     -54.922  14.982  19.168  1.00 88.79           N  
ATOM    807  CA  ASN   224     -54.337  16.023  19.978  1.00 88.79           C  
ATOM    808  C   ASN   224     -52.962  15.567  20.384  1.00 88.79           C  
ATOM    809  O   ASN   224     -52.829  14.629  21.169  1.00 88.79           O  
ATOM    810  CB  ASN   224     -55.108  16.254  21.297  1.00 88.79           C  
ATOM    811  CG  ASN   224     -54.443  17.319  22.180  1.00 88.79           C  
ATOM    812  ND2 ASN   224     -55.155  17.712  23.267  1.00 88.79           N  
ATOM    813  OD1 ASN   224     -53.326  17.775  21.944  1.00 88.79           O  
ATOM    814  N   ALA   225     -51.896  16.244  19.903  1.00 58.89           N  
ATOM    815  CA  ALA   225     -50.562  15.801  20.215  1.00 58.89           C  
ATOM    816  C   ALA   225     -49.994  16.546  21.397  1.00 58.89           C  
ATOM    817  O   ALA   225     -50.227  17.740  21.580  1.00 58.89           O  
ATOM    818  CB  ALA   225     -49.591  15.971  19.034  1.00 58.89           C  
ATOM    819  N   GLN   226     -49.198  15.838  22.230  1.00 57.58           N  
ATOM    820  CA  GLN   226     -48.597  16.427  23.399  1.00 57.58           C  
ATOM    821  C   GLN   226     -47.112  16.502  23.183  1.00 57.58           C  
ATOM    822  O   GLN   226     -46.454  15.496  22.926  1.00 57.58           O  
ATOM    823  CB  GLN   226     -48.812  15.583  24.671  1.00 57.58           C  
ATOM    824  CG  GLN   226     -48.242  16.216  25.942  1.00 57.58           C  
ATOM    825  CD  GLN   226     -49.217  17.285  26.407  1.00 57.58           C  
ATOM    826  NE2 GLN   226     -48.818  18.049  27.461  1.00 57.58           N  
ATOM    827  OE1 GLN   226     -50.305  17.444  25.854  1.00 57.58           O  
ATOM    828  N   ILE   227     -46.526  17.706  23.311  1.00 66.91           N  
ATOM    829  CA  ILE   227     -45.113  17.841  23.093  1.00 66.91           C  
ATOM    830  C   ILE   227     -44.470  18.059  24.438  1.00 66.91           C  
ATOM    831  O   ILE   227     -44.981  18.823  25.255  1.00 66.91           O  
ATOM    832  CB  ILE   227     -44.795  19.030  22.232  1.00 66.91           C  
ATOM    833  CG1 ILE   227     -45.610  18.937  20.925  1.00 66.91           C  
ATOM    834  CG2 ILE   227     -43.275  19.079  22.005  1.00 66.91           C  
ATOM    835  CD1 ILE   227     -45.591  20.185  20.045  1.00 66.91           C  
ATOM    836  N   ASN   228     -43.350  17.355  24.721  1.00 62.93           N  
ATOM    837  CA  ASN   228     -42.648  17.499  25.972  1.00 62.93           C  
ATOM    838  C   ASN   228     -41.265  17.999  25.676  1.00 62.93           C  
ATOM    839  O   ASN   228     -40.596  17.486  24.785  1.00 62.93           O  
ATOM    840  CB  ASN   228     -42.454  16.173  26.736  1.00 62.93           C  
ATOM    841  CG  ASN   228     -43.744  15.779  27.443  1.00 62.93           C  
ATOM    842  ND2 ASN   228     -43.881  14.459  27.735  1.00 62.93           N  
ATOM    843  OD1 ASN   228     -44.595  16.613  27.747  1.00 62.93           O  
ATOM    844  N   THR   229     -40.772  19.003  26.431  1.00147.28           N  
ATOM    845  CA  THR   229     -39.473  19.511  26.078  1.00147.28           C  
ATOM    846  C   THR   229     -38.451  19.105  27.105  1.00147.28           C  
ATOM    847  O   THR   229     -38.784  18.821  28.254  1.00147.28           O  
ATOM    848  CB  THR   229     -39.476  21.000  25.897  1.00147.28           C  
ATOM    849  CG2 THR   229     -39.527  21.667  27.279  1.00147.28           C  
ATOM    850  OG1 THR   229     -38.332  21.421  25.181  1.00147.28           O  
ATOM    851  N   LEU   230     -37.187  18.938  26.648  1.00133.77           N  
ATOM    852  CA  LEU   230     -35.997  18.663  27.421  1.00133.77           C  
ATOM    853  C   LEU   230     -35.504  19.872  28.150  1.00133.77           C  
ATOM    854  O   LEU   230     -35.050  19.772  29.288  1.00133.77           O  
ATOM    855  CB  LEU   230     -34.803  18.262  26.538  1.00133.77           C  
ATOM    856  CG  LEU   230     -34.799  16.807  26.041  1.00133.77           C  
ATOM    857  CD1 LEU   230     -34.410  15.858  27.180  1.00133.77           C  
ATOM    858  CD2 LEU   230     -36.127  16.409  25.383  1.00133.77           C  
ATOM    859  N   ALA   231     -35.516  21.044  27.490  1.00 53.98           N  
ATOM    860  CA  ALA   231     -34.953  22.178  28.161  1.00 53.98           C  
ATOM    861  C   ALA   231     -35.847  23.359  27.974  1.00 53.98           C  
ATOM    862  O   ALA   231     -36.481  23.515  26.932  1.00 53.98           O  
ATOM    863  CB  ALA   231     -33.538  22.548  27.665  1.00 53.98           C  
ATOM    864  N   GLY   232     -35.939  24.220  29.007  1.00 39.48           N  
ATOM    865  CA  GLY   232     -36.751  25.393  28.879  1.00 39.48           C  
ATOM    866  C   GLY   232     -37.651  25.500  30.068  1.00 39.48           C  
ATOM    867  O   GLY   232     -37.507  24.767  31.045  1.00 39.48           O  
ATOM    868  N   ARG   233     -38.621  26.437  29.985  1.00123.33           N  
ATOM    869  CA  ARG   233     -39.522  26.737  31.059  1.00123.33           C  
ATOM    870  C   ARG   233     -40.400  25.567  31.391  1.00123.33           C  
ATOM    871  O   ARG   233     -40.735  25.361  32.557  1.00123.33           O  
ATOM    872  CB  ARG   233     -40.457  27.923  30.784  1.00123.33           C  
ATOM    873  CG  ARG   233     -41.397  28.178  31.963  1.00123.33           C  
ATOM    874  CD  ARG   233     -40.667  28.498  33.271  1.00123.33           C  
ATOM    875  NE  ARG   233     -40.586  29.979  33.385  1.00123.33           N  
ATOM    876  CZ  ARG   233     -39.495  30.635  32.898  1.00123.33           C  
ATOM    877  NH1 ARG   233     -38.447  29.925  32.387  1.00123.33           N1+
ATOM    878  NH2 ARG   233     -39.444  31.998  32.919  1.00123.33           N  
ATOM    879  N   THR   234     -40.883  24.845  30.363  1.00 88.00           N  
ATOM    880  CA  THR   234     -41.714  23.674  30.510  1.00 88.00           C  
ATOM    881  C   THR   234     -40.926  22.426  30.766  1.00 88.00           C  
ATOM    882  O   THR   234     -41.507  21.393  31.097  1.00 88.00           O  
ATOM    883  CB  THR   234     -42.664  23.413  29.371  1.00 88.00           C  
ATOM    884  CG2 THR   234     -43.633  24.599  29.260  1.00 88.00           C  
ATOM    885  OG1 THR   234     -41.963  23.209  28.151  1.00 88.00           O  
ATOM    886  N   SER   235     -39.597  22.474  30.553  1.00 81.40           N  
ATOM    887  CA  SER   235     -38.683  21.356  30.603  1.00 81.40           C  
ATOM    888  C   SER   235     -39.061  20.307  31.607  1.00 81.40           C  
ATOM    889  O   SER   235     -39.610  20.581  32.673  1.00 81.40           O  
ATOM    890  CB  SER   235     -37.255  21.819  30.935  1.00 81.40           C  
ATOM    891  OG  SER   235     -36.441  20.699  31.241  1.00 81.40           O  
ATOM    892  N   VAL   236     -38.806  19.040  31.215  1.00110.08           N  
ATOM    893  CA  VAL   236     -39.008  17.868  32.021  1.00110.08           C  
ATOM    894  C   VAL   236     -38.093  17.952  33.210  1.00110.08           C  
ATOM    895  O   VAL   236     -38.484  17.630  34.332  1.00110.08           O  
ATOM    896  CB  VAL   236     -38.702  16.621  31.245  1.00110.08           C  
ATOM    897  CG1 VAL   236     -37.349  16.802  30.531  1.00110.08           C  
ATOM    898  CG2 VAL   236     -38.735  15.428  32.213  1.00110.08           C  
ATOM    899  N   LEU   237     -36.835  18.387  32.993  1.00102.06           N  
ATOM    900  CA  LEU   237     -35.883  18.520  34.059  1.00102.06           C  
ATOM    901  C   LEU   237     -36.335  19.591  34.990  1.00102.06           C  
ATOM    902  O   LEU   237     -36.144  19.500  36.200  1.00102.06           O  
ATOM    903  CB  LEU   237     -34.462  18.879  33.601  1.00102.06           C  
ATOM    904  CG  LEU   237     -33.688  17.721  32.953  1.00102.06           C  
ATOM    905  CD1 LEU   237     -34.350  17.240  31.653  1.00102.06           C  
ATOM    906  CD2 LEU   237     -32.209  18.108  32.788  1.00102.06           C  
ATOM    907  N   ARG   238     -36.975  20.636  34.448  1.00114.50           N  
ATOM    908  CA  ARG   238     -37.384  21.732  35.270  1.00114.50           C  
ATOM    909  C   ARG   238     -38.332  21.220  36.314  1.00114.50           C  
ATOM    910  O   ARG   238     -38.473  21.811  37.384  1.00114.50           O  
ATOM    911  CB  ARG   238     -38.038  22.879  34.501  1.00114.50           C  
ATOM    912  CG  ARG   238     -38.321  24.061  35.426  1.00114.50           C  
ATOM    913  CD  ARG   238     -38.384  25.408  34.712  1.00114.50           C  
ATOM    914  NE  ARG   238     -38.824  26.421  35.708  1.00114.50           N  
ATOM    915  CZ  ARG   238     -38.405  27.712  35.585  1.00114.50           C  
ATOM    916  NH1 ARG   238     -37.508  28.051  34.612  1.00114.50           N1+
ATOM    917  NH2 ARG   238     -38.891  28.668  36.431  1.00114.50           N  
ATOM    918  N   GLY   239     -39.045  20.127  35.998  1.00 46.39           N  
ATOM    919  CA  GLY   239     -40.008  19.522  36.871  1.00 46.39           C  
ATOM    920  C   GLY   239     -39.363  18.966  38.104  1.00 46.39           C  
ATOM    921  O   GLY   239     -39.986  18.963  39.164  1.00 46.39           O  
ATOM    922  N   LEU   240     -38.119  18.453  37.998  1.00122.61           N  
ATOM    923  CA  LEU   240     -37.533  17.764  39.115  1.00122.61           C  
ATOM    924  C   LEU   240     -36.933  18.691  40.126  1.00122.61           C  
ATOM    925  O   LEU   240     -36.636  19.861  39.888  1.00122.61           O  
ATOM    926  CB  LEU   240     -36.501  16.686  38.735  1.00122.61           C  
ATOM    927  CG  LEU   240     -37.124  15.556  37.894  1.00122.61           C  
ATOM    928  CD1 LEU   240     -38.359  14.966  38.593  1.00122.61           C  
ATOM    929  CD2 LEU   240     -37.400  16.011  36.453  1.00122.61           C  
ATOM    930  N   PRO   241     -36.799  18.122  41.303  1.00 69.52           N  
ATOM    931  CA  PRO   241     -36.247  18.805  42.439  1.00 69.52           C  
ATOM    932  C   PRO   241     -34.792  19.029  42.176  1.00 69.52           C  
ATOM    933  O   PRO   241     -34.188  18.209  41.492  1.00 69.52           O  
ATOM    934  CB  PRO   241     -36.505  17.898  43.639  1.00 69.52           C  
ATOM    935  CG  PRO   241     -37.747  17.086  43.224  1.00 69.52           C  
ATOM    936  CD  PRO   241     -37.661  17.014  41.692  1.00 69.52           C  
ATOM    937  N   LEU   242     -34.202  20.105  42.721  1.00 65.05           N  
ATOM    938  CA  LEU   242     -32.833  20.388  42.417  1.00 65.05           C  
ATOM    939  C   LEU   242     -31.980  19.264  42.918  1.00 65.05           C  
ATOM    940  O   LEU   242     -31.048  18.832  42.242  1.00 65.05           O  
ATOM    941  CB  LEU   242     -32.376  21.746  42.987  1.00 65.05           C  
ATOM    942  CG  LEU   242     -33.193  22.902  42.362  1.00 65.05           C  
ATOM    943  CD1 LEU   242     -32.681  24.297  42.751  1.00 65.05           C  
ATOM    944  CD2 LEU   242     -33.300  22.729  40.839  1.00 65.05           C  
ATOM    945  N   GLU   243     -32.312  18.709  44.093  1.00138.90           N  
ATOM    946  CA  GLU   243     -31.503  17.667  44.660  1.00138.90           C  
ATOM    947  C   GLU   243     -31.445  16.495  43.732  1.00138.90           C  
ATOM    948  O   GLU   243     -30.433  15.809  43.679  1.00138.90           O  
ATOM    949  CB  GLU   243     -32.043  17.129  45.995  1.00138.90           C  
ATOM    950  CG  GLU   243     -32.026  18.159  47.119  1.00138.90           C  
ATOM    951  CD  GLU   243     -33.128  19.165  46.836  1.00138.90           C  
ATOM    952  OE1 GLU   243     -34.322  18.764  46.860  1.00138.90           O  
ATOM    953  OE2 GLU   243     -32.785  20.349  46.583  1.00138.90           O1-
ATOM    954  N   VAL   244     -32.543  16.182  43.016  1.00121.08           N  
ATOM    955  CA  VAL   244     -32.499  15.029  42.158  1.00121.08           C  
ATOM    956  C   VAL   244     -31.560  15.262  41.008  1.00121.08           C  
ATOM    957  O   VAL   244     -30.826  14.352  40.624  1.00121.08           O  
ATOM    958  CB  VAL   244     -33.845  14.581  41.644  1.00121.08           C  
ATOM    959  CG1 VAL   244     -34.748  14.280  42.855  1.00121.08           C  
ATOM    960  CG2 VAL   244     -34.414  15.610  40.660  1.00121.08           C  
ATOM    961  N   ILE   245     -31.560  16.474  40.403  1.00 60.23           N  
ATOM    962  CA  ILE   245     -30.690  16.754  39.289  1.00 60.23           C  
ATOM    963  C   ILE   245     -29.266  16.744  39.764  1.00 60.23           C  
ATOM    964  O   ILE   245     -28.383  16.190  39.110  1.00 60.23           O  
ATOM    965  CB  ILE   245     -30.992  18.061  38.612  1.00 60.23           C  
ATOM    966  CG1 ILE   245     -32.391  17.975  37.971  1.00 60.23           C  
ATOM    967  CG2 ILE   245     -29.867  18.371  37.602  1.00 60.23           C  
ATOM    968  CD1 ILE   245     -32.945  19.303  37.457  1.00 60.23           C  
ATOM    969  N   THR   246     -29.011  17.374  40.923  1.00102.61           N  
ATOM    970  CA  THR   246     -27.698  17.448  41.492  1.00102.61           C  
ATOM    971  C   THR   246     -27.248  16.068  41.885  1.00102.61           C  
ATOM    972  O   THR   246     -26.111  15.677  41.621  1.00102.61           O  
ATOM    973  CB  THR   246     -27.665  18.363  42.687  1.00102.61           C  
ATOM    974  CG2 THR   246     -28.453  17.739  43.856  1.00102.61           C  
ATOM    975  OG1 THR   246     -26.327  18.623  43.073  1.00102.61           O  
ATOM    976  N   ASN   247     -28.141  15.282  42.513  1.00 67.06           N  
ATOM    977  CA  ASN   247     -27.815  13.955  42.949  1.00 67.06           C  
ATOM    978  C   ASN   247     -27.546  13.106  41.755  1.00 67.06           C  
ATOM    979  O   ASN   247     -26.636  12.280  41.773  1.00 67.06           O  
ATOM    980  CB  ASN   247     -28.982  13.222  43.645  1.00 67.06           C  
ATOM    981  CG  ASN   247     -29.250  13.752  45.044  1.00 67.06           C  
ATOM    982  ND2 ASN   247     -28.198  14.281  45.719  1.00 67.06           N  
ATOM    983  OD1 ASN   247     -30.382  13.691  45.521  1.00 67.06           O  
ATOM    984  N   GLY   248     -28.373  13.255  40.701  1.00 43.65           N  
ATOM    985  CA  GLY   248     -28.270  12.378  39.570  1.00 43.65           C  
ATOM    986  C   GLY   248     -26.995  12.550  38.807  1.00 43.65           C  
ATOM    987  O   GLY   248     -26.279  11.584  38.556  1.00 43.65           O  
ATOM    988  N   PHE   249     -26.699  13.800  38.411  1.00 91.29           N  
ATOM    989  CA  PHE   249     -25.563  14.160  37.609  1.00 91.29           C  
ATOM    990  C   PHE   249     -24.307  14.215  38.416  1.00 91.29           C  
ATOM    991  O   PHE   249     -23.213  14.113  37.863  1.00 91.29           O  
ATOM    992  CB  PHE   249     -25.748  15.480  36.844  1.00 91.29           C  
ATOM    993  CG  PHE   249     -26.837  15.206  35.869  1.00 91.29           C  
ATOM    994  CD1 PHE   249     -26.604  14.419  34.762  1.00 91.29           C  
ATOM    995  CD2 PHE   249     -28.089  15.737  36.058  1.00 91.29           C  
ATOM    996  CE1 PHE   249     -27.600  14.157  33.853  1.00 91.29           C  
ATOM    997  CE2 PHE   249     -29.089  15.478  35.149  1.00 91.29           C  
ATOM    998  CZ  PHE   249     -28.851  14.689  34.048  1.00 91.29           C  
ATOM    999  N   GLN   250     -24.416  14.370  39.748  1.00 74.80           N  
ATOM   1000  CA  GLN   250     -23.233  14.595  40.523  1.00 74.80           C  
ATOM   1001  C   GLN   250     -22.657  15.894  40.059  1.00 74.80           C  
ATOM   1002  O   GLN   250     -21.510  15.980  39.626  1.00 74.80           O  
ATOM   1003  CB  GLN   250     -22.152  13.508  40.321  1.00 74.80           C  
ATOM   1004  CG  GLN   250     -22.601  12.098  40.713  1.00 74.80           C  
ATOM   1005  CD  GLN   250     -21.475  11.123  40.390  1.00 74.80           C  
ATOM   1006  NE2 GLN   250     -21.745  10.166  39.460  1.00 74.80           N  
ATOM   1007  OE1 GLN   250     -20.379  11.208  40.942  1.00 74.80           O  
ATOM   1008  N   ILE   251     -23.496  16.946  40.143  1.00162.37           N  
ATOM   1009  CA  ILE   251     -23.218  18.288  39.727  1.00162.37           C  
ATOM   1010  C   ILE   251     -23.323  19.140  40.961  1.00162.37           C  
ATOM   1011  O   ILE   251     -23.908  18.722  41.959  1.00162.37           O  
ATOM   1012  CB  ILE   251     -24.294  18.775  38.818  1.00162.37           C  
ATOM   1013  CG1 ILE   251     -23.909  20.064  38.094  1.00162.37           C  
ATOM   1014  CG2 ILE   251     -25.561  18.895  39.676  1.00162.37           C  
ATOM   1015  CD1 ILE   251     -24.980  20.537  37.110  1.00162.37           C  
ATOM   1016  N   SER   252     -22.726  20.350  40.947  1.00 92.80           N  
ATOM   1017  CA  SER   252     -22.867  21.193  42.098  1.00 92.80           C  
ATOM   1018  C   SER   252     -24.263  21.719  42.114  1.00 92.80           C  
ATOM   1019  O   SER   252     -24.942  21.765  41.087  1.00 92.80           O  
ATOM   1020  CB  SER   252     -21.859  22.355  42.143  1.00 92.80           C  
ATOM   1021  OG  SER   252     -21.868  23.070  40.920  1.00 92.80           O  
ATOM   1022  N   PRO   253     -24.736  22.072  43.275  1.00 93.56           N  
ATOM   1023  CA  PRO   253     -26.082  22.548  43.374  1.00 93.56           C  
ATOM   1024  C   PRO   253     -26.240  23.859  42.689  1.00 93.56           C  
ATOM   1025  O   PRO   253     -27.329  24.146  42.194  1.00 93.56           O  
ATOM   1026  CB  PRO   253     -26.454  22.496  44.860  1.00 93.56           C  
ATOM   1027  CG  PRO   253     -25.117  22.256  45.583  1.00 93.56           C  
ATOM   1028  CD  PRO   253     -24.248  21.541  44.535  1.00 93.56           C  
ATOM   1029  N   GLU   254     -25.186  24.687  42.652  1.00116.36           N  
ATOM   1030  CA  GLU   254     -25.341  25.915  41.945  1.00116.36           C  
ATOM   1031  C   GLU   254     -25.461  25.572  40.498  1.00116.36           C  
ATOM   1032  O   GLU   254     -26.225  26.185  39.756  1.00116.36           O  
ATOM   1033  CB  GLU   254     -24.190  26.919  42.166  1.00116.36           C  
ATOM   1034  CG  GLU   254     -22.794  26.370  41.885  1.00116.36           C  
ATOM   1035  CD  GLU   254     -22.290  25.676  43.145  1.00116.36           C  
ATOM   1036  OE1 GLU   254     -23.051  25.601  44.145  1.00116.36           O  
ATOM   1037  OE2 GLU   254     -21.119  25.214  43.118  1.00116.36           O1-
ATOM   1038  N   GLU   255     -24.713  24.544  40.059  1.00 96.76           N  
ATOM   1039  CA  GLU   255     -24.723  24.153  38.681  1.00 96.76           C  
ATOM   1040  C   GLU   255     -26.079  23.626  38.304  1.00 96.76           C  
ATOM   1041  O   GLU   255     -26.557  23.866  37.196  1.00 96.76           O  
ATOM   1042  CB  GLU   255     -23.650  23.111  38.360  1.00 96.76           C  
ATOM   1043  CG  GLU   255     -23.352  23.006  36.866  1.00 96.76           C  
ATOM   1044  CD  GLU   255     -21.909  22.539  36.749  1.00 96.76           C  
ATOM   1045  OE1 GLU   255     -21.287  22.294  37.815  1.00 96.76           O  
ATOM   1046  OE2 GLU   255     -21.407  22.442  35.600  1.00 96.76           O1-
ATOM   1047  N   ALA   256     -26.742  22.892  39.212  1.00 35.02           N  
ATOM   1048  CA  ALA   256     -28.045  22.361  38.916  1.00 35.02           C  
ATOM   1049  C   ALA   256     -28.978  23.506  38.681  1.00 35.02           C  
ATOM   1050  O   ALA   256     -29.845  23.445  37.809  1.00 35.02           O  
ATOM   1051  CB  ALA   256     -28.629  21.511  40.056  1.00 35.02           C  
ATOM   1052  N   ARG   257     -28.809  24.600  39.448  1.00122.00           N  
ATOM   1053  CA  ARG   257     -29.674  25.734  39.310  1.00122.00           C  
ATOM   1054  C   ARG   257     -29.603  26.166  37.888  1.00122.00           C  
ATOM   1055  O   ARG   257     -30.615  26.519  37.287  1.00122.00           O  
ATOM   1056  CB  ARG   257     -29.220  26.956  40.127  1.00122.00           C  
ATOM   1057  CG  ARG   257     -29.957  28.261  39.781  1.00122.00           C  
ATOM   1058  CD  ARG   257     -29.090  29.319  39.082  1.00122.00           C  
ATOM   1059  NE  ARG   257     -29.713  29.686  37.775  1.00122.00           N  
ATOM   1060  CZ  ARG   257     -29.320  30.831  37.143  1.00122.00           C  
ATOM   1061  NH1 ARG   257     -28.364  31.629  37.704  1.00122.00           N1+
ATOM   1062  NH2 ARG   257     -29.880  31.178  35.948  1.00122.00           N  
ATOM   1063  N   ARG   258     -28.384  26.149  37.322  1.00119.05           N  
ATOM   1064  CA  ARG   258     -28.195  26.609  35.982  1.00119.05           C  
ATOM   1065  C   ARG   258     -28.935  25.761  34.999  1.00119.05           C  
ATOM   1066  O   ARG   258     -29.722  26.272  34.204  1.00119.05           O  
ATOM   1067  CB  ARG   258     -26.723  26.566  35.549  1.00119.05           C  
ATOM   1068  CG  ARG   258     -25.816  27.558  36.270  1.00119.05           C  
ATOM   1069  CD  ARG   258     -24.443  27.661  35.604  1.00119.05           C  
ATOM   1070  NE  ARG   258     -24.684  28.246  34.261  1.00119.05           N  
ATOM   1071  CZ  ARG   258     -23.659  28.412  33.378  1.00119.05           C  
ATOM   1072  NH1 ARG   258     -22.390  28.039  33.726  1.00119.05           N1+
ATOM   1073  NH2 ARG   258     -23.908  28.941  32.146  1.00119.05           N  
ATOM   1074  N   VAL   259     -28.740  24.429  35.058  1.00 47.97           N  
ATOM   1075  CA  VAL   259     -29.331  23.594  34.051  1.00 47.97           C  
ATOM   1076  C   VAL   259     -30.814  23.766  34.089  1.00 47.97           C  
ATOM   1077  O   VAL   259     -31.468  23.880  33.054  1.00 47.97           O  
ATOM   1078  CB  VAL   259     -29.024  22.130  34.217  1.00 47.97           C  
ATOM   1079  CG1 VAL   259     -29.935  21.347  33.258  1.00 47.97           C  
ATOM   1080  CG2 VAL   259     -27.523  21.906  33.942  1.00 47.97           C  
ATOM   1081  N   LYS   260     -31.387  23.796  35.297  1.00130.94           N  
ATOM   1082  CA  LYS   260     -32.811  23.879  35.410  1.00130.94           C  
ATOM   1083  C   LYS   260     -33.381  25.188  34.941  1.00130.94           C  
ATOM   1084  O   LYS   260     -34.404  25.187  34.263  1.00130.94           O  
ATOM   1085  CB  LYS   260     -33.288  23.676  36.855  1.00130.94           C  
ATOM   1086  CG  LYS   260     -34.760  24.030  37.052  1.00130.94           C  
ATOM   1087  CD  LYS   260     -35.342  23.527  38.371  1.00130.94           C  
ATOM   1088  CE  LYS   260     -36.525  24.371  38.843  1.00130.94           C  
ATOM   1089  NZ  LYS   260     -36.946  25.270  37.750  1.00130.94           N1+
ATOM   1090  N   PHE   261     -32.807  26.323  35.394  1.00122.72           N  
ATOM   1091  CA  PHE   261     -33.246  27.676  35.141  1.00122.72           C  
ATOM   1092  C   PHE   261     -32.747  28.417  33.922  1.00122.72           C  
ATOM   1093  O   PHE   261     -33.494  29.235  33.390  1.00122.72           O  
ATOM   1094  CB  PHE   261     -33.006  28.588  36.352  1.00122.72           C  
ATOM   1095  CG  PHE   261     -34.037  28.246  37.370  1.00122.72           C  
ATOM   1096  CD1 PHE   261     -35.289  28.809  37.292  1.00122.72           C  
ATOM   1097  CD2 PHE   261     -33.765  27.371  38.400  1.00122.72           C  
ATOM   1098  CE1 PHE   261     -36.249  28.507  38.229  1.00122.72           C  
ATOM   1099  CE2 PHE   261     -34.724  27.059  39.335  1.00122.72           C  
ATOM   1100  CZ  PHE   261     -35.970  27.631  39.249  1.00122.72           C  
ATOM   1101  N   ASN   262     -31.502  28.172  33.450  1.00 74.77           N  
ATOM   1102  CA  ASN   262     -30.839  29.068  32.520  1.00 74.77           C  
ATOM   1103  C   ASN   262     -31.690  29.405  31.344  1.00 74.77           C  
ATOM   1104  O   ASN   262     -31.793  30.577  30.980  1.00 74.77           O  
ATOM   1105  CB  ASN   262     -29.516  28.509  31.950  1.00 74.77           C  
ATOM   1106  CG  ASN   262     -28.394  28.692  32.966  1.00 74.77           C  
ATOM   1107  ND2 ASN   262     -27.167  28.230  32.600  1.00 74.77           N  
ATOM   1108  OD1 ASN   262     -28.589  29.251  34.044  1.00 74.77           O  
ATOM   1109  N   THR   263     -32.348  28.418  30.721  1.00 66.01           N  
ATOM   1110  CA  THR   263     -33.106  28.798  29.571  1.00 66.01           C  
ATOM   1111  C   THR   263     -34.530  29.039  29.964  1.00 66.01           C  
ATOM   1112  O   THR   263     -35.216  28.160  30.483  1.00 66.01           O  
ATOM   1113  CB  THR   263     -33.081  27.784  28.468  1.00 66.01           C  
ATOM   1114  CG2 THR   263     -33.813  28.391  27.260  1.00 66.01           C  
ATOM   1115  OG1 THR   263     -31.744  27.505  28.105  1.00 66.01           O  
ATOM   1116  N   LEU   264     -34.950  30.307  29.795  1.00124.83           N  
ATOM   1117  CA  LEU   264     -36.263  30.822  30.044  1.00124.83           C  
ATOM   1118  C   LEU   264     -37.279  30.462  28.983  1.00124.83           C  
ATOM   1119  O   LEU   264     -38.439  30.211  29.303  1.00124.83           O  
ATOM   1120  CB  LEU   264     -36.262  32.360  30.206  1.00124.83           C  
ATOM   1121  CG  LEU   264     -35.658  33.181  29.043  1.00124.83           C  
ATOM   1122  CD1 LEU   264     -35.769  34.684  29.339  1.00124.83           C  
ATOM   1123  CD2 LEU   264     -34.195  32.812  28.754  1.00124.83           C  
ATOM   1124  N   GLU   265     -36.881  30.448  27.690  1.00 91.69           N  
ATOM   1125  CA  GLU   265     -37.813  30.255  26.601  1.00 91.69           C  
ATOM   1126  C   GLU   265     -38.384  28.872  26.610  1.00 91.69           C  
ATOM   1127  O   GLU   265     -37.719  27.915  27.010  1.00 91.69           O  
ATOM   1128  CB  GLU   265     -37.206  30.505  25.208  1.00 91.69           C  
ATOM   1129  CG  GLU   265     -35.916  29.730  24.939  1.00 91.69           C  
ATOM   1130  CD  GLU   265     -34.770  30.651  25.328  1.00 91.69           C  
ATOM   1131  OE1 GLU   265     -35.057  31.738  25.892  1.00 91.69           O  
ATOM   1132  OE2 GLU   265     -33.592  30.290  25.066  1.00 91.69           O1-
ATOM   1133  N   THR   266     -39.691  28.752  26.267  1.00 94.74           N  
ATOM   1134  CA  THR   266     -40.274  27.442  26.257  1.00 94.74           C  
ATOM   1135  C   THR   266     -39.826  26.589  25.113  1.00 94.74           C  
ATOM   1136  O   THR   266     -39.164  25.572  25.312  1.00 94.74           O  
ATOM   1137  CB  THR   266     -41.767  27.450  26.161  1.00 94.74           C  
ATOM   1138  CG2 THR   266     -42.260  25.989  26.105  1.00 94.74           C  
ATOM   1139  OG1 THR   266     -42.325  28.131  27.269  1.00 94.74           O  
ATOM   1140  N   THR   267     -40.331  26.936  23.906  1.00110.20           N  
ATOM   1141  CA  THR   267     -40.083  26.262  22.654  1.00110.20           C  
ATOM   1142  C   THR   267     -38.968  26.780  21.783  1.00110.20           C  
ATOM   1143  O   THR   267     -38.063  26.043  21.395  1.00110.20           O  
ATOM   1144  CB  THR   267     -41.304  26.319  21.793  1.00110.20           C  
ATOM   1145  CG2 THR   267     -40.993  25.686  20.428  1.00110.20           C  
ATOM   1146  OG1 THR   267     -42.388  25.666  22.432  1.00110.20           O  
ATOM   1147  N   LEU   268     -39.020  28.095  21.447  1.00 87.28           N  
ATOM   1148  CA  LEU   268     -38.140  28.651  20.450  1.00 87.28           C  
ATOM   1149  C   LEU   268     -37.068  29.437  21.124  1.00 87.28           C  
ATOM   1150  O   LEU   268     -37.251  29.921  22.240  1.00 87.28           O  
ATOM   1151  CB  LEU   268     -38.830  29.604  19.453  1.00 87.28           C  
ATOM   1152  CG  LEU   268     -39.867  28.936  18.526  1.00 87.28           C  
ATOM   1153  CD1 LEU   268     -40.488  29.959  17.560  1.00 87.28           C  
ATOM   1154  CD2 LEU   268     -39.273  27.723  17.793  1.00 87.28           C  
ATOM   1155  N   THR   269     -35.899  29.545  20.457  1.00131.64           N  
ATOM   1156  CA  THR   269     -34.809  30.293  21.016  1.00131.64           C  
ATOM   1157  C   THR   269     -33.843  30.654  19.937  1.00131.64           C  
ATOM   1158  O   THR   269     -33.836  30.065  18.856  1.00131.64           O  
ATOM   1159  CB  THR   269     -34.060  29.522  22.066  1.00131.64           C  
ATOM   1160  CG2 THR   269     -33.572  28.191  21.473  1.00131.64           C  
ATOM   1161  OG1 THR   269     -32.975  30.289  22.566  1.00131.64           O  
ATOM   1162  N   HIS   270     -33.003  31.676  20.216  1.00 61.11           N  
ATOM   1163  CA  HIS   270     -31.996  32.093  19.291  1.00 61.11           C  
ATOM   1164  C   HIS   270     -30.728  31.402  19.685  1.00 61.11           C  
ATOM   1165  O   HIS   270     -30.532  31.057  20.848  1.00 61.11           O  
ATOM   1166  CB  HIS   270     -31.759  33.611  19.315  1.00 61.11           C  
ATOM   1167  CG  HIS   270     -31.040  34.081  18.092  1.00 61.11           C  
ATOM   1168  CD2 HIS   270     -29.709  34.106  17.815  1.00 61.11           C  
ATOM   1169  ND1 HIS   270     -31.666  34.572  16.969  1.00 61.11           N  
ATOM   1170  CE1 HIS   270     -30.694  34.859  16.071  1.00 61.11           C  
ATOM   1171  NE2 HIS   270     -29.486  34.592  16.541  1.00 61.11           N  
ATOM   1172  N   SER   271     -29.823  31.171  18.718  1.00120.24           N  
ATOM   1173  CA  SER   271     -28.631  30.454  19.058  1.00120.24           C  
ATOM   1174  C   SER   271     -27.653  30.702  17.971  1.00120.24           C  
ATOM   1175  O   SER   271     -27.632  31.787  17.390  1.00120.24           O  
ATOM   1176  CB  SER   271     -28.862  28.934  19.123  1.00120.24           C  
ATOM   1177  OG  SER   271     -29.828  28.630  20.118  1.00120.24           O  
ATOM   1178  N   SER   272     -26.804  29.682  17.704  1.00230.09           N  
ATOM   1179  CA  SER   272     -25.833  29.736  16.652  1.00230.09           C  
ATOM   1180  C   SER   272     -25.091  30.999  16.806  1.00230.09           C  
ATOM   1181  O   SER   272     -25.065  31.800  15.875  1.00230.09           O  
ATOM   1182  CB  SER   272     -26.459  29.730  15.254  1.00230.09           C  
ATOM   1183  OG  SER   272     -25.427  29.790  14.283  1.00230.09           O  
ATOM   1184  N   GLY   273     -24.488  31.132  18.007  1.00131.64           N  
ATOM   1185  CA  GLY   273     -23.774  32.214  18.624  1.00131.64           C  
ATOM   1186  C   GLY   273     -22.532  32.644  17.903  1.00131.64           C  
ATOM   1187  O   GLY   273     -22.184  33.817  18.052  1.00131.64           O  
ATOM   1188  N   PRO   274     -21.804  31.829  17.173  1.00250.41           N  
ATOM   1189  CA  PRO   274     -20.587  32.308  16.574  1.00250.41           C  
ATOM   1190  C   PRO   274     -20.833  33.498  15.708  1.00250.41           C  
ATOM   1191  O   PRO   274     -19.910  34.284  15.500  1.00250.41           O  
ATOM   1192  CB  PRO   274     -19.971  31.100  15.877  1.00250.41           C  
ATOM   1193  CG  PRO   274     -20.438  29.920  16.752  1.00250.41           C  
ATOM   1194  CD  PRO   274     -21.770  30.387  17.370  1.00250.41           C  
ATOM   1195  N   ALA   275     -22.058  33.633  15.181  1.00223.54           N  
ATOM   1196  CA  ALA   275     -22.387  34.834  14.479  1.00223.54           C  
ATOM   1197  C   ALA   275     -23.631  35.324  15.134  1.00223.54           C  
ATOM   1198  O   ALA   275     -24.522  34.540  15.457  1.00223.54           O  
ATOM   1199  CB  ALA   275     -22.704  34.631  12.988  1.00223.54           C  
ATOM   1200  N   SER   276     -23.729  36.641  15.378  1.00222.68           N  
ATOM   1201  CA  SER   276     -24.939  37.093  15.993  1.00222.68           C  
ATOM   1202  C   SER   276     -25.599  38.007  15.030  1.00222.68           C  
ATOM   1203  O   SER   276     -24.942  38.731  14.283  1.00222.68           O  
ATOM   1204  CB  SER   276     -24.745  37.854  17.313  1.00222.68           C  
ATOM   1205  OG  SER   276     -24.330  36.960  18.337  1.00222.68           O  
ATOM   1206  N   TYR   277     -26.941  37.976  15.016  1.00273.42           N  
ATOM   1207  CA  TYR   277     -27.654  38.806  14.098  1.00273.42           C  
ATOM   1208  C   TYR   277     -28.749  39.446  14.883  1.00273.42           C  
ATOM   1209  O   TYR   277     -28.985  39.075  16.031  1.00273.42           O  
ATOM   1210  CB  TYR   277     -28.267  38.000  12.941  1.00273.42           C  
ATOM   1211  CG  TYR   277     -28.753  38.993  11.946  1.00273.42           C  
ATOM   1212  CD1 TYR   277     -27.869  39.902  11.420  1.00273.42           C  
ATOM   1213  CD2 TYR   277     -30.058  38.995  11.515  1.00273.42           C  
ATOM   1214  CE1 TYR   277     -28.283  40.828  10.493  1.00273.42           C  
ATOM   1215  CE2 TYR   277     -30.478  39.917  10.586  1.00273.42           C  
ATOM   1216  CZ  TYR   277     -29.592  40.839  10.078  1.00273.42           C  
ATOM   1217  OH  TYR   277     -30.027  41.784   9.127  1.00273.42           O  
ATOM   1218  N   GLY   278     -29.433  40.450  14.301  1.00 71.94           N  
ATOM   1219  CA  GLY   278     -30.521  41.061  15.012  1.00 71.94           C  
ATOM   1220  C   GLY   278     -30.124  42.436  15.449  1.00 71.94           C  
ATOM   1221  O   GLY   278     -30.985  43.250  15.782  1.00 71.94           O  
ATOM   1222  N   ARG   279     -28.813  42.729  15.467  1.00215.60           N  
ATOM   1223  CA  ARG   279     -28.372  44.051  15.805  1.00215.60           C  
ATOM   1224  C   ARG   279     -28.598  44.287  17.262  1.00215.60           C  
ATOM   1225  O   ARG   279     -29.466  43.670  17.879  1.00215.60           O  
ATOM   1226  CB  ARG   279     -29.081  45.150  14.994  1.00215.60           C  
ATOM   1227  CG  ARG   279     -28.708  45.094  13.516  1.00215.60           C  
ATOM   1228  CD  ARG   279     -28.280  46.436  12.926  1.00215.60           C  
ATOM   1229  NE  ARG   279     -27.789  46.141  11.553  1.00215.60           N  
ATOM   1230  CZ  ARG   279     -26.566  45.552  11.433  1.00215.60           C  
ATOM   1231  NH1 ARG   279     -25.882  45.243  12.573  1.00215.60           N1+
ATOM   1232  NH2 ARG   279     -26.035  45.260  10.209  1.00215.60           N  
ATOM   1233  N   PRO   280     -27.799  45.158  17.828  1.00173.85           N  
ATOM   1234  CA  PRO   280     -27.912  45.472  19.224  1.00173.85           C  
ATOM   1235  C   PRO   280     -29.324  45.834  19.553  1.00173.85           C  
ATOM   1236  O   PRO   280     -29.846  45.346  20.555  1.00173.85           O  
ATOM   1237  CB  PRO   280     -27.011  46.681  19.447  1.00173.85           C  
ATOM   1238  CG  PRO   280     -27.067  47.405  18.089  1.00173.85           C  
ATOM   1239  CD  PRO   280     -27.208  46.256  17.079  1.00173.85           C  
ATOM   1240  N   ARG   281     -29.956  46.696  18.738  1.00226.83           N  
ATOM   1241  CA  ARG   281     -31.315  47.045  19.016  1.00226.83           C  
ATOM   1242  C   ARG   281     -32.129  46.055  18.260  1.00226.83           C  
ATOM   1243  O   ARG   281     -31.588  45.259  17.493  1.00226.83           O  
ATOM   1244  CB  ARG   281     -31.751  48.442  18.532  1.00226.83           C  
ATOM   1245  CG  ARG   281     -30.862  49.603  18.986  1.00226.83           C  
ATOM   1246  CD  ARG   281     -31.432  50.972  18.600  1.00226.83           C  
ATOM   1247  NE  ARG   281     -32.055  50.814  17.254  1.00226.83           N  
ATOM   1248  CZ  ARG   281     -31.776  51.669  16.227  1.00226.83           C  
ATOM   1249  NH1 ARG   281     -30.856  52.667  16.384  1.00226.83           N1+
ATOM   1250  NH2 ARG   281     -32.420  51.518  15.033  1.00226.83           N  
ATOM   1251  N   VAL   282     -33.451  46.052  18.478  1.00 78.69           N  
ATOM   1252  CA  VAL   282     -34.259  45.112  17.764  1.00 78.69           C  
ATOM   1253  C   VAL   282     -34.181  45.487  16.321  1.00 78.69           C  
ATOM   1254  O   VAL   282     -34.020  46.655  15.976  1.00 78.69           O  
ATOM   1255  CB  VAL   282     -35.704  45.120  18.192  1.00 78.69           C  
ATOM   1256  CG1 VAL   282     -36.523  44.198  17.272  1.00 78.69           C  
ATOM   1257  CG2 VAL   282     -35.763  44.736  19.682  1.00 78.69           C  
ATOM   1258  N   ALA   283     -34.253  44.481  15.434  1.00203.53           N  
ATOM   1259  CA  ALA   283     -34.168  44.738  14.027  1.00203.53           C  
ATOM   1260  C   ALA   283     -35.434  45.405  13.602  1.00203.53           C  
ATOM   1261  O   ALA   283     -36.461  45.293  14.271  1.00203.53           O  
ATOM   1262  CB  ALA   283     -34.010  43.461  13.190  1.00203.53           C  
ATOM   1263  N   ALA   284     -35.381  46.148  12.477  1.00209.76           N  
ATOM   1264  CA  ALA   284     -36.551  46.823  12.003  1.00209.76           C  
ATOM   1265  C   ALA   284     -36.964  46.154  10.742  1.00209.76           C  
ATOM   1266  O   ALA   284     -36.138  45.820   9.893  1.00209.76           O  
ATOM   1267  CB  ALA   284     -36.319  48.305  11.661  1.00209.76           C  
ATOM   1268  N   ALA   285     -38.282  45.941  10.605  1.00 34.82           N  
ATOM   1269  CA  ALA   285     -38.814  45.304   9.444  1.00 34.82           C  
ATOM   1270  C   ALA   285     -38.431  46.147   8.241  1.00 34.82           C  
ATOM   1271  O   ALA   285     -38.503  47.402   8.338  1.00 34.82           O  
ATOM   1272  CB  ALA   285     -40.345  45.216   9.467  1.00 34.82           C  
ATOM   1273  OXT ALA   285     -38.074  45.540   7.196  1.00 34.82           O1-
END
