# Supplementary material for: Uses of Phage Display in Agriculture: Sequence Analysis and Comparative Modeling of Late Embryogenesis Abundant Client Proteins Suggest Protein-Nucleic Acid Binding Functionality
Source: Comput Math Methods Med. 2013 Jul 9;2013:470390. doi: 10.1155/2013/470390 (PMC3727180; doi:10.1155/2013/470390)
Supplement: Supplementary file 1 — LEA client protein homology models. The seven PDB coordinate files are labeled by the TAIR locus identifier of the full-length protein from which the binding region originates. [file 470390.f1.zip › 470390.f1/at5g46430.2.pdb]

ATOM      1  N   MET     1      55.135 -92.594 172.911  1.00 16.21           N  
ATOM      2  CA  MET     1      53.982 -92.975 172.065  1.00 16.21           C  
ATOM      3  C   MET     1      53.283 -94.175 172.622  1.00 16.21           C  
ATOM      4  O   MET     1      52.844 -94.169 173.769  1.00 16.21           O  
ATOM      5  CB  MET     1      54.411 -93.315 170.626  1.00 16.21           C  
ATOM      6  CG  MET     1      54.901 -92.140 169.773  1.00 16.21           C  
ATOM      7  SD  MET     1      55.328 -92.645 168.077  1.00 16.21           S  
ATOM      8  CE  MET     1      53.605 -92.868 167.542  1.00 16.21           C  
ATOM      9  N   ALA     2      53.189 -95.252 171.819  1.00 56.23           N  
ATOM     10  CA  ALA     2      52.430 -96.387 172.244  1.00 56.23           C  
ATOM     11  C   ALA     2      53.098 -97.023 173.416  1.00 56.23           C  
ATOM     12  O   ALA     2      54.118 -97.695 173.274  1.00 56.23           O  
ATOM     13  CB  ALA     2      52.266 -97.477 171.170  1.00 56.23           C  
ATOM     14  N   VAL     3      52.519 -96.841 174.622  1.00135.43           N  
ATOM     15  CA  VAL     3      53.128 -97.455 175.768  1.00135.43           C  
ATOM     16  C   VAL     3      52.096 -98.176 176.602  1.00135.43           C  
ATOM     17  O   VAL     3      51.487 -97.587 177.492  1.00135.43           O  
ATOM     18  CB  VAL     3      53.848 -96.442 176.617  1.00135.43           C  
ATOM     19  CG1 VAL     3      52.877 -95.296 176.954  1.00135.43           C  
ATOM     20  CG2 VAL     3      54.472 -97.156 177.828  1.00135.43           C  
ATOM     21  N   PRO     4      51.899 -99.457 176.388  1.00 81.99           N  
ATOM     22  CA  PRO     4      50.946-100.175 177.200  1.00 81.99           C  
ATOM     23  C   PRO     4      51.534-100.592 178.502  1.00 81.99           C  
ATOM     24  O   PRO     4      52.751-100.525 178.665  1.00 81.99           O  
ATOM     25  CB  PRO     4      50.439-101.354 176.370  1.00 81.99           C  
ATOM     26  CG  PRO     4      51.421-101.443 175.189  1.00 81.99           C  
ATOM     27  CD  PRO     4      51.938-100.003 175.041  1.00 81.99           C  
ATOM     28  N   LEU     5      50.670-101.010 179.443  1.00174.12           N  
ATOM     29  CA  LEU     5      51.097-101.473 180.726  1.00174.12           C  
ATOM     30  C   LEU     5      50.498-102.846 180.900  1.00174.12           C  
ATOM     31  O   LEU     5      49.825-103.348 180.001  1.00174.12           O  
ATOM     32  CB  LEU     5      50.664-100.499 181.830  1.00174.12           C  
ATOM     33  CG  LEU     5      51.276 -99.100 181.575  1.00174.12           C  
ATOM     34  CD1 LEU     5      50.814 -98.060 182.603  1.00174.12           C  
ATOM     35  CD2 LEU     5      52.811 -99.173 181.459  1.00174.12           C  
ATOM     36  N   LEU     6      50.770-103.517 182.037  1.00 82.14           N  
ATOM     37  CA  LEU     6      50.297-104.862 182.228  1.00 82.14           C  
ATOM     38  C   LEU     6      48.839-104.856 182.527  1.00 82.14           C  
ATOM     39  O   LEU     6      48.321-103.967 183.201  1.00 82.14           O  
ATOM     40  CB  LEU     6      50.998-105.611 183.382  1.00 82.14           C  
ATOM     41  CG  LEU     6      50.529-107.066 183.629  1.00 82.14           C  
ATOM     42  CD1 LEU     6      49.153-107.162 184.321  1.00 82.14           C  
ATOM     43  CD2 LEU     6      50.571-107.877 182.331  1.00 82.14           C  
ATOM     44  N   THR     7      48.120-105.874 182.018  1.00114.51           N  
ATOM     45  CA  THR     7      46.736-105.928 182.352  1.00114.51           C  
ATOM     46  C   THR     7      46.359-107.332 182.625  1.00114.51           C  
ATOM     47  O   THR     7      46.951-108.280 182.108  1.00114.51           O  
ATOM     48  CB  THR     7      45.798-105.447 181.283  1.00114.51           C  
ATOM     49  CG2 THR     7      45.800-106.466 180.133  1.00114.51           C  
ATOM     50  OG1 THR     7      44.483-105.311 181.806  1.00114.51           O  
ATOM     51  N   LYS     8      45.353-107.467 183.499  1.00 55.94           N  
ATOM     52  CA  LYS     8      44.718-108.709 183.773  1.00 55.94           C  
ATOM     53  C   LYS     8      43.884-108.925 182.565  1.00 55.94           C  
ATOM     54  O   LYS     8      43.559-107.963 181.872  1.00 55.94           O  
ATOM     55  CB  LYS     8      43.741-108.599 184.951  1.00 55.94           C  
ATOM     56  CG  LYS     8      42.993-109.889 185.276  1.00 55.94           C  
ATOM     57  CD  LYS     8      42.276-109.839 186.626  1.00 55.94           C  
ATOM     58  CE  LYS     8      41.659-111.169 187.068  1.00 55.94           C  
ATOM     59  NZ  LYS     8      41.127-111.050 188.445  1.00 55.94           N1+
ATOM     60  N   LYS     9      43.528-110.186 182.263  1.00 69.39           N  
ATOM     61  CA  LYS     9      42.687-110.419 181.127  1.00 69.39           C  
ATOM     62  C   LYS     9      41.450-109.627 181.375  1.00 69.39           C  
ATOM     63  O   LYS     9      40.854-109.717 182.444  1.00 69.39           O  
ATOM     64  CB  LYS     9      42.257-111.893 180.983  1.00 69.39           C  
ATOM     65  CG  LYS     9      41.363-112.138 179.766  1.00 69.39           C  
ATOM     66  CD  LYS     9      41.222-113.605 179.358  1.00 69.39           C  
ATOM     67  CE  LYS     9      40.050-114.319 180.028  1.00 69.39           C  
ATOM     68  NZ  LYS     9      39.858-115.650 179.408  1.00 69.39           N1+
ATOM     69  N   VAL    10      41.019-108.823 180.388  1.00 50.08           N  
ATOM     70  CA  VAL    10      39.893-107.976 180.638  1.00 50.08           C  
ATOM     71  C   VAL    10      38.640-108.694 180.241  1.00 50.08           C  
ATOM     72  O   VAL    10      38.503-109.178 179.120  1.00 50.08           O  
ATOM     73  CB  VAL    10      39.962-106.706 179.848  1.00 50.08           C  
ATOM     74  CG1 VAL    10      38.688-105.901 180.126  1.00 50.08           C  
ATOM     75  CG2 VAL    10      41.272-105.970 180.186  1.00 50.08           C  
ATOM     76  N   VAL    11      37.660-108.791 181.160  1.00104.88           N  
ATOM     77  CA  VAL    11      36.442-109.451 180.776  1.00104.88           C  
ATOM     78  C   VAL    11      35.295-108.502 180.972  1.00104.88           C  
ATOM     79  O   VAL    11      35.211-107.815 181.989  1.00104.88           O  
ATOM     80  CB  VAL    11      36.164-110.694 181.567  1.00104.88           C  
ATOM     81  CG1 VAL    11      36.176-110.334 183.062  1.00104.88           C  
ATOM     82  CG2 VAL    11      34.831-111.296 181.088  1.00104.88           C  
ATOM     83  N   LYS    12      34.373-108.438 179.982  1.00124.56           N  
ATOM     84  CA  LYS    12      33.222-107.576 180.089  1.00124.56           C  
ATOM     85  C   LYS    12      32.041-108.450 180.334  1.00124.56           C  
ATOM     86  O   LYS    12      31.657-109.245 179.478  1.00124.56           O  
ATOM     87  CB  LYS    12      32.952-106.755 178.813  1.00124.56           C  
ATOM     88  CG  LYS    12      33.898-105.562 178.633  1.00124.56           C  
ATOM     89  CD  LYS    12      35.373-105.935 178.465  1.00124.56           C  
ATOM     90  CE  LYS    12      35.654-106.865 177.286  1.00124.56           C  
ATOM     91  NZ  LYS    12      37.109-107.121 177.184  1.00124.56           N1+
ATOM     92  N   LYS    13      31.425-108.307 181.523  1.00134.11           N  
ATOM     93  CA  LYS    13      30.348-109.174 181.886  1.00134.11           C  
ATOM     94  C   LYS    13      29.196-108.989 180.940  1.00134.11           C  
ATOM     95  O   LYS    13      28.746-109.963 180.338  1.00134.11           O  
ATOM     96  CB  LYS    13      29.885-108.962 183.341  1.00134.11           C  
ATOM     97  CG  LYS    13      30.993-109.281 184.362  1.00134.11           C  
ATOM     98  CD  LYS    13      31.505-110.724 184.305  1.00134.11           C  
ATOM     99  CE  LYS    13      32.833-110.941 185.046  1.00134.11           C  
ATOM    100  NZ  LYS    13      32.593-111.284 186.465  1.00134.11           N1+
ATOM    101  N   ARG    14      28.679-107.755 180.746  1.00164.91           N  
ATOM    102  CA  ARG    14      27.650-107.655 179.749  1.00164.91           C  
ATOM    103  C   ARG    14      27.666-106.264 179.207  1.00164.91           C  
ATOM    104  O   ARG    14      27.824-105.292 179.944  1.00164.91           O  
ATOM    105  CB  ARG    14      26.217-107.995 180.205  1.00164.91           C  
ATOM    106  CG  ARG    14      25.575-107.033 181.196  1.00164.91           C  
ATOM    107  CD  ARG    14      24.225-107.561 181.683  1.00164.91           C  
ATOM    108  NE  ARG    14      23.463-108.035 180.490  1.00164.91           N  
ATOM    109  CZ  ARG    14      22.430-107.303 179.981  1.00164.91           C  
ATOM    110  NH1 ARG    14      22.078-106.111 180.546  1.00164.91           N1+
ATOM    111  NH2 ARG    14      21.731-107.778 178.907  1.00164.91           N  
ATOM    112  N   SER    15      27.580-106.161 177.866  1.00 52.89           N  
ATOM    113  CA  SER    15      27.582-104.915 177.154  1.00 52.89           C  
ATOM    114  C   SER    15      26.235-104.255 177.160  1.00 52.89           C  
ATOM    115  O   SER    15      26.134-103.030 177.222  1.00 52.89           O  
ATOM    116  CB  SER    15      28.023-105.093 175.691  1.00 52.89           C  
ATOM    117  OG  SER    15      29.390-105.471 175.646  1.00 52.89           O  
ATOM    118  N   ALA    16      25.154-105.055 177.095  1.00 41.18           N  
ATOM    119  CA  ALA    16      23.822-104.519 176.990  1.00 41.18           C  
ATOM    120  C   ALA    16      23.456-103.838 178.273  1.00 41.18           C  
ATOM    121  O   ALA    16      23.874-104.244 179.357  1.00 41.18           O  
ATOM    122  CB  ALA    16      22.774-105.607 176.713  1.00 41.18           C  
ATOM    123  N   LYS    17      22.659-102.755 178.169  1.00140.81           N  
ATOM    124  CA  LYS    17      22.203-102.055 179.334  1.00140.81           C  
ATOM    125  C   LYS    17      21.059-102.817 179.904  1.00140.81           C  
ATOM    126  O   LYS    17      20.415-103.599 179.208  1.00140.81           O  
ATOM    127  CB  LYS    17      21.717-100.625 179.063  1.00140.81           C  
ATOM    128  CG  LYS    17      22.864 -99.645 178.851  1.00140.81           C  
ATOM    129  CD  LYS    17      23.767 -99.512 180.081  1.00140.81           C  
ATOM    130  CE  LYS    17      24.922 -98.531 179.889  1.00140.81           C  
ATOM    131  NZ  LYS    17      25.939 -99.118 178.991  1.00140.81           N1+
ATOM    132  N   PHE    18      20.787-102.625 181.210  1.00 79.36           N  
ATOM    133  CA  PHE    18      19.692-103.319 181.828  1.00 79.36           C  
ATOM    134  C   PHE    18      18.459-102.486 181.620  1.00 79.36           C  
ATOM    135  O   PHE    18      18.379-101.350 182.077  1.00 79.36           O  
ATOM    136  CB  PHE    18      19.873-103.542 183.347  1.00 79.36           C  
ATOM    137  CG  PHE    18      20.889-104.612 183.616  1.00 79.36           C  
ATOM    138  CD1 PHE    18      22.241-104.332 183.680  1.00 79.36           C  
ATOM    139  CD2 PHE    18      20.483-105.908 183.819  1.00 79.36           C  
ATOM    140  CE1 PHE    18      23.158-105.326 183.934  1.00 79.36           C  
ATOM    141  CE2 PHE    18      21.394-106.907 184.073  1.00 79.36           C  
ATOM    142  CZ  PHE    18      22.739-106.617 184.132  1.00 79.36           C  
ATOM    143  N   ILE    19      17.434-103.063 180.957  1.00108.87           N  
ATOM    144  CA  ILE    19      16.268-102.313 180.576  1.00108.87           C  
ATOM    145  C   ILE    19      15.153-102.622 181.536  1.00108.87           C  
ATOM    146  O   ILE    19      14.975-103.766 181.955  1.00108.87           O  
ATOM    147  CB  ILE    19      15.759-102.678 179.208  1.00108.87           C  
ATOM    148  CG1 ILE    19      16.876-102.620 178.145  1.00108.87           C  
ATOM    149  CG2 ILE    19      14.566-101.763 178.890  1.00108.87           C  
ATOM    150  CD1 ILE    19      17.521-101.244 177.954  1.00108.87           C  
ATOM    151  N   ARG    20      14.374-101.584 181.920  1.00 89.74           N  
ATOM    152  CA  ARG    20      13.275-101.781 182.828  1.00 89.74           C  
ATOM    153  C   ARG    20      12.266-102.637 182.132  1.00 89.74           C  
ATOM    154  O   ARG    20      12.078-102.574 180.918  1.00 89.74           O  
ATOM    155  CB  ARG    20      12.534-100.503 183.273  1.00 89.74           C  
ATOM    156  CG  ARG    20      11.412-100.874 184.246  1.00 89.74           C  
ATOM    157  CD  ARG    20      10.496 -99.754 184.739  1.00 89.74           C  
ATOM    158  NE  ARG    20       9.425-100.453 185.505  1.00 89.74           N  
ATOM    159  CZ  ARG    20       8.599 -99.783 186.361  1.00 89.74           C  
ATOM    160  NH1 ARG    20       8.692 -98.430 186.493  1.00 89.74           N1+
ATOM    161  NH2 ARG    20       7.680-100.483 187.086  1.00 89.74           N  
ATOM    162  N   PRO    21      11.632-103.457 182.921  1.00187.06           N  
ATOM    163  CA  PRO    21      10.695-104.405 182.385  1.00187.06           C  
ATOM    164  C   PRO    21       9.431-103.805 181.866  1.00187.06           C  
ATOM    165  O   PRO    21       8.881-102.915 182.513  1.00187.06           O  
ATOM    166  CB  PRO    21      10.482-105.448 183.478  1.00187.06           C  
ATOM    167  CG  PRO    21      11.795-105.410 184.275  1.00187.06           C  
ATOM    168  CD  PRO    21      12.302-103.973 184.106  1.00187.06           C  
ATOM    169  N   GLN    22       8.952-104.322 180.716  1.00149.07           N  
ATOM    170  CA  GLN    22       7.740-103.900 180.072  1.00149.07           C  
ATOM    171  C   GLN    22       7.808-102.428 179.835  1.00149.07           C  
ATOM    172  O   GLN    22       6.799-101.727 179.785  1.00149.07           O  
ATOM    173  CB  GLN    22       6.458-104.333 180.816  1.00149.07           C  
ATOM    174  CG  GLN    22       6.298-103.780 182.232  1.00149.07           C  
ATOM    175  CD  GLN    22       4.988-104.299 182.809  1.00149.07           C  
ATOM    176  NE2 GLN    22       4.128-103.350 183.263  1.00149.07           N  
ATOM    177  OE1 GLN    22       4.732-105.501 182.852  1.00149.07           O  
ATOM    178  N   SER    23       9.050-101.943 179.673  1.00102.62           N  
ATOM    179  CA  SER    23       9.378-100.586 179.355  1.00102.62           C  
ATOM    180  C   SER    23       9.004-100.379 177.933  1.00102.62           C  
ATOM    181  O   SER    23       8.663 -99.271 177.525  1.00102.62           O  
ATOM    182  CB  SER    23      10.897-100.379 179.487  1.00102.62           C  
ATOM    183  OG  SER    23      11.261 -99.057 179.150  1.00102.62           O  
ATOM    184  N   ASP    24       9.089-101.465 177.145  1.00 42.20           N  
ATOM    185  CA  ASP    24       8.793-101.453 175.745  1.00 42.20           C  
ATOM    186  C   ASP    24       7.326-101.206 175.572  1.00 42.20           C  
ATOM    187  O   ASP    24       6.905-100.547 174.622  1.00 42.20           O  
ATOM    188  CB  ASP    24       9.092-102.808 175.073  1.00 42.20           C  
ATOM    189  CG  ASP    24      10.577-103.103 175.225  1.00 42.20           C  
ATOM    190  OD1 ASP    24      11.365-102.135 175.388  1.00 42.20           O  
ATOM    191  OD2 ASP    24      10.943-104.311 175.191  1.00 42.20           O1-
ATOM    192  N   ARG    25       6.510-101.758 176.492  1.00119.65           N  
ATOM    193  CA  ARG    25       5.079-101.684 176.394  1.00119.65           C  
ATOM    194  C   ARG    25       4.558-100.282 176.471  1.00119.65           C  
ATOM    195  O   ARG    25       3.762 -99.882 175.622  1.00119.65           O  
ATOM    196  CB  ARG    25       4.349-102.468 177.500  1.00119.65           C  
ATOM    197  CG  ARG    25       4.377-103.984 177.310  1.00119.65           C  
ATOM    198  CD  ARG    25       3.956-104.411 175.905  1.00119.65           C  
ATOM    199  NE  ARG    25       2.673-103.720 175.584  1.00119.65           N  
ATOM    200  CZ  ARG    25       1.471-104.319 175.831  1.00119.65           C  
ATOM    201  NH1 ARG    25       1.432-105.556 176.407  1.00119.65           N1+
ATOM    202  NH2 ARG    25       0.311-103.683 175.488  1.00119.65           N  
ATOM    203  N   ARG    26       4.995 -99.475 177.462  1.00128.09           N  
ATOM    204  CA  ARG    26       4.364 -98.185 177.569  1.00128.09           C  
ATOM    205  C   ARG    26       5.323 -97.064 177.378  1.00128.09           C  
ATOM    206  O   ARG    26       6.512 -97.163 177.675  1.00128.09           O  
ATOM    207  CB  ARG    26       3.628 -97.918 178.894  1.00128.09           C  
ATOM    208  CG  ARG    26       2.224 -98.533 178.972  1.00128.09           C  
ATOM    209  CD  ARG    26       1.091 -97.533 178.711  1.00128.09           C  
ATOM    210  NE  ARG    26       1.245 -96.407 179.677  1.00128.09           N  
ATOM    211  CZ  ARG    26       0.155 -95.714 180.129  1.00128.09           C  
ATOM    212  NH1 ARG    26      -1.099 -96.068 179.720  1.00128.09           N1+
ATOM    213  NH2 ARG    26       0.315 -94.677 181.001  1.00128.09           N  
ATOM    214  N   ILE    27       4.787 -95.966 176.814  1.00130.02           N  
ATOM    215  CA  ILE    27       5.518 -94.766 176.565  1.00130.02           C  
ATOM    216  C   ILE    27       5.835 -94.115 177.880  1.00130.02           C  
ATOM    217  O   ILE    27       6.957 -93.654 178.093  1.00130.02           O  
ATOM    218  CB  ILE    27       4.762 -93.824 175.656  1.00130.02           C  
ATOM    219  CG1 ILE    27       5.708 -92.779 175.047  1.00130.02           C  
ATOM    220  CG2 ILE    27       3.572 -93.223 176.425  1.00130.02           C  
ATOM    221  CD1 ILE    27       6.333 -91.845 176.078  1.00130.02           C  
ATOM    222  N   THR    28       4.866 -94.096 178.818  1.00102.24           N  
ATOM    223  CA  THR    28       5.091 -93.440 180.073  1.00102.24           C  
ATOM    224  C   THR    28       6.260 -94.084 180.743  1.00102.24           C  
ATOM    225  O   THR    28       7.092 -93.397 181.333  1.00102.24           O  
ATOM    226  CB  THR    28       3.931 -93.511 181.041  1.00102.24           C  
ATOM    227  CG2 THR    28       2.719 -92.753 180.471  1.00102.24           C  
ATOM    228  OG1 THR    28       3.591 -94.862 181.322  1.00102.24           O  
ATOM    229  N   VAL    29       6.370 -95.422 180.652  1.00 46.16           N  
ATOM    230  CA  VAL    29       7.429 -96.099 181.353  1.00 46.16           C  
ATOM    231  C   VAL    29       8.730 -95.957 180.624  1.00 46.16           C  
ATOM    232  O   VAL    29       8.859 -96.330 179.459  1.00 46.16           O  
ATOM    233  CB  VAL    29       7.165 -97.563 181.532  1.00 46.16           C  
ATOM    234  CG1 VAL    29       8.427 -98.218 182.120  1.00 46.16           C  
ATOM    235  CG2 VAL    29       5.915 -97.715 182.414  1.00 46.16           C  
ATOM    236  N   LYS    30       9.744 -95.421 181.337  1.00122.84           N  
ATOM    237  CA  LYS    30      11.060 -95.211 180.810  1.00122.84           C  
ATOM    238  C   LYS    30      11.859 -96.465 181.037  1.00122.84           C  
ATOM    239  O   LYS    30      11.463 -97.344 181.803  1.00122.84           O  
ATOM    240  CB  LYS    30      11.812 -94.067 181.501  1.00122.84           C  
ATOM    241  CG  LYS    30      11.051 -92.735 181.519  1.00122.84           C  
ATOM    242  CD  LYS    30      10.764 -92.143 180.137  1.00122.84           C  
ATOM    243  CE  LYS    30       9.592 -92.803 179.408  1.00122.84           C  
ATOM    244  NZ  LYS    30       9.458 -92.236 178.047  1.00122.84           N1+
ATOM    245  N   GLU    31      13.008 -96.564 180.335  1.00 78.11           N  
ATOM    246  CA  GLU    31      13.939 -97.660 180.319  1.00 78.11           C  
ATOM    247  C   GLU    31      14.706 -97.793 181.595  1.00 78.11           C  
ATOM    248  O   GLU    31      15.174 -98.893 181.887  1.00 78.11           O  
ATOM    249  CB  GLU    31      15.024 -97.488 179.264  1.00 78.11           C  
ATOM    250  CG  GLU    31      14.522 -97.466 177.828  1.00 78.11           C  
ATOM    251  CD  GLU    31      15.734 -97.026 177.033  1.00 78.11           C  
ATOM    252  OE1 GLU    31      16.792 -96.819 177.686  1.00 78.11           O  
ATOM    253  OE2 GLU    31      15.631 -96.882 175.788  1.00 78.11           O1-
ATOM    254  N   SER    32      14.922 -96.681 182.338  1.00 96.58           N  
ATOM    255  CA  SER    32      15.776 -96.713 183.499  1.00 96.58           C  
ATOM    256  C   SER    32      15.345 -97.832 184.380  1.00 96.58           C  
ATOM    257  O   SER    32      14.176 -97.944 184.744  1.00 96.58           O  
ATOM    258  CB  SER    32      15.746 -95.440 184.356  1.00 96.58           C  
ATOM    259  OG  SER    32      14.518 -95.371 185.068  1.00 96.58           O  
ATOM    260  N   TRP    33      16.316 -98.685 184.757  1.00108.40           N  
ATOM    261  CA  TRP    33      16.001 -99.872 185.486  1.00108.40           C  
ATOM    262  C   TRP    33      15.450 -99.573 186.833  1.00108.40           C  
ATOM    263  O   TRP    33      15.847 -98.626 187.508  1.00108.40           O  
ATOM    264  CB  TRP    33      17.179-100.849 185.662  1.00108.40           C  
ATOM    265  CG  TRP    33      16.901-101.961 186.655  1.00108.40           C  
ATOM    266  CD1 TRP    33      17.266-102.020 187.967  1.00108.40           C  
ATOM    267  CD2 TRP    33      16.159-103.169 186.388  1.00108.40           C  
ATOM    268  CE2 TRP    33      16.114-103.892 187.585  1.00108.40           C  
ATOM    269  CE3 TRP    33      15.565-103.633 185.254  1.00108.40           C  
ATOM    270  NE1 TRP    33      16.787-103.168 188.541  1.00108.40           N  
ATOM    271  CZ2 TRP    33      15.477-105.096 187.655  1.00108.40           C  
ATOM    272  CZ3 TRP    33      14.926-104.855 185.333  1.00108.40           C  
ATOM    273  CH2 TRP    33      14.882-105.572 186.512  1.00108.40           C  
ATOM    274  N   ARG    34      14.448-100.391 187.209  1.00173.44           N  
ATOM    275  CA  ARG    34      13.843-100.385 188.504  1.00173.44           C  
ATOM    276  C   ARG    34      13.638-101.819 188.869  1.00173.44           C  
ATOM    277  O   ARG    34      13.388-102.669 188.015  1.00173.44           O  
ATOM    278  CB  ARG    34      12.477 -99.672 188.611  1.00173.44           C  
ATOM    279  CG  ARG    34      12.550 -98.162 188.886  1.00173.44           C  
ATOM    280  CD  ARG    34      12.822 -97.282 187.669  1.00173.44           C  
ATOM    281  NE  ARG    34      11.506 -96.822 187.149  1.00173.44           N  
ATOM    282  CZ  ARG    34      10.925 -95.706 187.681  1.00173.44           C  
ATOM    283  NH1 ARG    34      11.498 -95.090 188.758  1.00173.44           N1+
ATOM    284  NH2 ARG    34       9.788 -95.197 187.124  1.00173.44           N  
ATOM    285  N   ARG    35      13.746-102.129 190.173  1.00149.14           N  
ATOM    286  CA  ARG    35      13.643-103.491 190.601  1.00149.14           C  
ATOM    287  C   ARG    35      12.219-103.808 190.920  1.00149.14           C  
ATOM    288  O   ARG    35      11.611-103.187 191.784  1.00149.14           O  
ATOM    289  CB  ARG    35      14.439-103.754 191.881  1.00149.14           C  
ATOM    290  CG  ARG    35      13.973-105.000 192.620  1.00149.14           C  
ATOM    291  CD  ARG    35      14.367-104.982 194.091  1.00149.14           C  
ATOM    292  NE  ARG    35      13.408-105.885 194.774  1.00149.14           N  
ATOM    293  CZ  ARG    35      13.662-107.218 194.846  1.00149.14           C  
ATOM    294  NH1 ARG    35      14.876-107.711 194.466  1.00149.14           N1+
ATOM    295  NH2 ARG    35      12.682-108.060 195.295  1.00149.14           N  
ATOM    296  N   PRO    36      11.681-104.767 190.211  1.00100.87           N  
ATOM    297  CA  PRO    36      10.334-105.229 190.415  1.00100.87           C  
ATOM    298  C   PRO    36      10.153-105.754 191.805  1.00100.87           C  
ATOM    299  O   PRO    36      10.859-106.687 192.190  1.00100.87           O  
ATOM    300  CB  PRO    36      10.128-106.332 189.380  1.00100.87           C  
ATOM    301  CG  PRO    36      11.548-106.896 189.191  1.00100.87           C  
ATOM    302  CD  PRO    36      12.467-105.681 189.408  1.00100.87           C  
ATOM    303  N   LYS    37       9.237-105.130 192.569  1.00129.52           N  
ATOM    304  CA  LYS    37       8.807-105.525 193.880  1.00129.52           C  
ATOM    305  C   LYS    37       7.781-106.616 193.824  1.00129.52           C  
ATOM    306  O   LYS    37       7.647-107.383 194.776  1.00129.52           O  
ATOM    307  CB  LYS    37       8.253-104.361 194.725  1.00129.52           C  
ATOM    308  CG  LYS    37       9.351-103.562 195.436  1.00129.52           C  
ATOM    309  CD  LYS    37      10.271-102.772 194.504  1.00129.52           C  
ATOM    310  CE  LYS    37      11.437-102.090 195.224  1.00129.52           C  
ATOM    311  NZ  LYS    37      12.122-101.146 194.311  1.00129.52           N1+
ATOM    312  N   GLY    38       7.028-106.706 192.709  1.00 44.55           N  
ATOM    313  CA  GLY    38       5.873-107.559 192.635  1.00 44.55           C  
ATOM    314  C   GLY    38       6.166-108.954 193.091  1.00 44.55           C  
ATOM    315  O   GLY    38       7.194-109.543 192.771  1.00 44.55           O  
ATOM    316  N   ILE    39       5.235-109.486 193.911  1.00113.69           N  
ATOM    317  CA  ILE    39       5.245-110.830 194.407  1.00113.69           C  
ATOM    318  C   ILE    39       4.971-111.757 193.251  1.00113.69           C  
ATOM    319  O   ILE    39       5.517-112.854 193.183  1.00113.69           O  
ATOM    320  CB  ILE    39       4.241-111.020 195.518  1.00113.69           C  
ATOM    321  CG1 ILE    39       2.808-110.756 195.022  1.00113.69           C  
ATOM    322  CG2 ILE    39       4.675-110.104 196.678  1.00113.69           C  
ATOM    323  CD1 ILE    39       1.716-110.996 196.070  1.00113.69           C  
ATOM    324  N   ASP    40       4.057-111.350 192.345  1.00 64.79           N  
ATOM    325  CA  ASP    40       3.670-112.075 191.160  1.00 64.79           C  
ATOM    326  C   ASP    40       4.716-112.032 190.061  1.00 64.79           C  
ATOM    327  O   ASP    40       4.875-113.005 189.324  1.00 64.79           O  
ATOM    328  CB  ASP    40       2.363-111.536 190.551  1.00 64.79           C  
ATOM    329  CG  ASP    40       1.219-111.884 191.492  1.00 64.79           C  
ATOM    330  OD1 ASP    40       0.656-113.006 191.351  1.00 64.79           O  
ATOM    331  OD2 ASP    40       0.885-111.034 192.354  1.00 64.79           O1-
ATOM    332  N   SER    41       5.466-110.913 189.941  1.00103.94           N  
ATOM    333  CA  SER    41       6.318-110.610 188.813  1.00103.94           C  
ATOM    334  C   SER    41       7.279-111.702 188.444  1.00103.94           C  
ATOM    335  O   SER    41       7.988-112.280 189.266  1.00103.94           O  
ATOM    336  CB  SER    41       7.122-109.310 188.992  1.00103.94           C  
ATOM    337  OG  SER    41       8.047-109.452 190.055  1.00103.94           O  
ATOM    338  N   ARG    42       7.300-111.996 187.129  1.00 72.10           N  
ATOM    339  CA  ARG    42       8.107-113.027 186.554  1.00 72.10           C  
ATOM    340  C   ARG    42       9.567-112.711 186.621  1.00 72.10           C  
ATOM    341  O   ARG    42      10.360-113.559 187.024  1.00 72.10           O  
ATOM    342  CB  ARG    42       7.680-113.325 185.109  1.00 72.10           C  
ATOM    343  CG  ARG    42       6.322-114.038 185.104  1.00 72.10           C  
ATOM    344  CD  ARG    42       5.671-114.243 183.737  1.00 72.10           C  
ATOM    345  NE  ARG    42       4.496-115.128 183.976  1.00 72.10           N  
ATOM    346  CZ  ARG    42       4.620-116.475 183.788  1.00 72.10           C  
ATOM    347  NH1 ARG    42       5.720-116.973 183.150  1.00 72.10           N1+
ATOM    348  NH2 ARG    42       3.653-117.324 184.249  1.00 72.10           N  
ATOM    349  N   VAL    43       9.971-111.478 186.267  1.00110.83           N  
ATOM    350  CA  VAL    43      11.376-111.189 186.250  1.00110.83           C  
ATOM    351  C   VAL    43      11.926-111.318 187.630  1.00110.83           C  
ATOM    352  O   VAL    43      12.968-111.938 187.830  1.00110.83           O  
ATOM    353  CB  VAL    43      11.696-109.821 185.713  1.00110.83           C  
ATOM    354  CG1 VAL    43      11.202-108.746 186.694  1.00110.83           C  
ATOM    355  CG2 VAL    43      13.204-109.758 185.432  1.00110.83           C  
ATOM    356  N   ARG    44      11.196-110.800 188.630  1.00158.76           N  
ATOM    357  CA  ARG    44      11.686-110.814 189.977  1.00158.76           C  
ATOM    358  C   ARG    44      11.918-112.251 190.336  1.00158.76           C  
ATOM    359  O   ARG    44      12.820-112.574 191.106  1.00158.76           O  
ATOM    360  CB  ARG    44      10.705-110.160 190.971  1.00158.76           C  
ATOM    361  CG  ARG    44      11.332-109.899 192.336  1.00158.76           C  
ATOM    362  CD  ARG    44      11.287-111.109 193.266  1.00158.76           C  
ATOM    363  NE  ARG    44       9.893-111.229 193.765  1.00158.76           N  
ATOM    364  CZ  ARG    44       9.375-112.467 194.000  1.00158.76           C  
ATOM    365  NH1 ARG    44      10.112-113.575 193.695  1.00158.76           N1+
ATOM    366  NH2 ARG    44       8.124-112.591 194.531  1.00158.76           N  
ATOM    367  N   ARG    45      11.077-113.144 189.777  1.00121.45           N  
ATOM    368  CA  ARG    45      11.128-114.573 189.955  1.00121.45           C  
ATOM    369  C   ARG    45      12.260-115.242 189.225  1.00121.45           C  
ATOM    370  O   ARG    45      12.655-116.338 189.620  1.00121.45           O  
ATOM    371  CB  ARG    45       9.830-115.302 189.592  1.00121.45           C  
ATOM    372  CG  ARG    45       8.804-115.286 190.725  1.00121.45           C  
ATOM    373  CD  ARG    45       7.728-116.363 190.548  1.00121.45           C  
ATOM    374  NE  ARG    45       6.861-116.361 191.758  1.00121.45           N  
ATOM    375  CZ  ARG    45       5.635-116.960 191.704  1.00121.45           C  
ATOM    376  NH1 ARG    45       5.211-117.537 190.541  1.00121.45           N1+
ATOM    377  NH2 ARG    45       4.832-116.983 192.808  1.00121.45           N  
ATOM    378  N   LYS    46      12.819-114.638 188.152  1.00131.92           N  
ATOM    379  CA  LYS    46      13.829-115.322 187.384  1.00131.92           C  
ATOM    380  C   LYS    46      13.244-116.472 186.621  1.00131.92           C  
ATOM    381  O   LYS    46      13.728-117.600 186.702  1.00131.92           O  
ATOM    382  CB  LYS    46      14.977-115.887 188.246  1.00131.92           C  
ATOM    383  CG  LYS    46      15.980-114.844 188.716  1.00131.92           C  
ATOM    384  CD  LYS    46      16.719-114.232 187.529  1.00131.92           C  
ATOM    385  CE  LYS    46      17.967-113.449 187.910  1.00131.92           C  
ATOM    386  NZ  LYS    46      18.597-112.918 186.682  1.00131.92           N1+
ATOM    387  N   PHE    47      12.154-116.215 185.865  1.00 70.74           N  
ATOM    388  CA  PHE    47      11.591-117.238 185.023  1.00 70.74           C  
ATOM    389  C   PHE    47      12.461-117.421 183.823  1.00 70.74           C  
ATOM    390  O   PHE    47      13.185-116.516 183.409  1.00 70.74           O  
ATOM    391  CB  PHE    47      10.165-116.949 184.514  1.00 70.74           C  
ATOM    392  CG  PHE    47       9.222-117.285 185.613  1.00 70.74           C  
ATOM    393  CD1 PHE    47       8.914-118.601 185.870  1.00 70.74           C  
ATOM    394  CD2 PHE    47       8.635-116.303 186.378  1.00 70.74           C  
ATOM    395  CE1 PHE    47       8.042-118.941 186.878  1.00 70.74           C  
ATOM    396  CE2 PHE    47       7.766-116.638 187.386  1.00 70.74           C  
ATOM    397  CZ  PHE    47       7.466-117.954 187.642  1.00 70.74           C  
ATOM    398  N   LYS    48      12.423-118.630 183.227  1.00114.30           N  
ATOM    399  CA  LYS    48      13.247-118.873 182.079  1.00114.30           C  
ATOM    400  C   LYS    48      12.856-117.939 180.990  1.00114.30           C  
ATOM    401  O   LYS    48      11.676-117.781 180.680  1.00114.30           O  
ATOM    402  CB  LYS    48      13.119-120.260 181.430  1.00114.30           C  
ATOM    403  CG  LYS    48      13.996-121.367 182.005  1.00114.30           C  
ATOM    404  CD  LYS    48      13.713-122.729 181.360  1.00114.30           C  
ATOM    405  CE  LYS    48      13.584-122.671 179.835  1.00114.30           C  
ATOM    406  NZ  LYS    48      12.191-122.350 179.452  1.00114.30           N1+
ATOM    407  N   GLY    49      13.877-117.315 180.371  1.00 27.52           N  
ATOM    408  CA  GLY    49      13.694-116.483 179.222  1.00 27.52           C  
ATOM    409  C   GLY    49      13.606-115.047 179.618  1.00 27.52           C  
ATOM    410  O   GLY    49      13.719-114.161 178.772  1.00 27.52           O  
ATOM    411  N   VAL    50      13.416-114.761 180.917  1.00106.84           N  
ATOM    412  CA  VAL    50      13.270-113.384 181.285  1.00106.84           C  
ATOM    413  C   VAL    50      14.605-112.735 181.473  1.00106.84           C  
ATOM    414  O   VAL    50      15.640-113.388 181.610  1.00106.84           O  
ATOM    415  CB  VAL    50      12.455-113.138 182.525  1.00106.84           C  
ATOM    416  CG1 VAL    50      11.027-113.640 182.266  1.00106.84           C  
ATOM    417  CG2 VAL    50      13.148-113.775 183.739  1.00106.84           C  
ATOM    418  N   THR    51      14.587-111.389 181.459  1.00111.68           N  
ATOM    419  CA  THR    51      15.766-110.594 181.622  1.00111.68           C  
ATOM    420  C   THR    51      16.380-110.918 182.936  1.00111.68           C  
ATOM    421  O   THR    51      15.708-111.304 183.893  1.00111.68           O  
ATOM    422  CB  THR    51      15.494-109.114 181.615  1.00111.68           C  
ATOM    423  CG2 THR    51      14.966-108.696 180.231  1.00111.68           C  
ATOM    424  OG1 THR    51      14.554-108.776 182.628  1.00111.68           O  
ATOM    425  N   LEU    52      17.717-110.806 182.998  1.00 64.75           N  
ATOM    426  CA  LEU    52      18.325-111.014 184.266  1.00 64.75           C  
ATOM    427  C   LEU    52      18.494-109.638 184.809  1.00 64.75           C  
ATOM    428  O   LEU    52      19.067-108.762 184.164  1.00 64.75           O  
ATOM    429  CB  LEU    52      19.685-111.722 184.191  1.00 64.75           C  
ATOM    430  CG  LEU    52      19.568-113.059 183.434  1.00 64.75           C  
ATOM    431  CD1 LEU    52      20.815-113.940 183.605  1.00 64.75           C  
ATOM    432  CD2 LEU    52      18.246-113.773 183.761  1.00 64.75           C  
ATOM    433  N   MET    53      17.961-109.417 186.021  1.00134.40           N  
ATOM    434  CA  MET    53      17.951-108.134 186.649  1.00134.40           C  
ATOM    435  C   MET    53      19.352-107.787 186.984  1.00134.40           C  
ATOM    436  O   MET    53      20.243-108.629 186.899  1.00134.40           O  
ATOM    437  CB  MET    53      17.120-108.125 187.941  1.00134.40           C  
ATOM    438  CG  MET    53      17.475-109.282 188.876  1.00134.40           C  
ATOM    439  SD  MET    53      16.393-109.420 190.328  1.00134.40           S  
ATOM    440  CE  MET    53      14.888-109.621 189.333  1.00134.40           C  
ATOM    441  N   PRO    54      19.581-106.550 187.327  1.00 94.66           N  
ATOM    442  CA  PRO    54      20.898-106.100 187.648  1.00 94.66           C  
ATOM    443  C   PRO    54      21.395-106.813 188.861  1.00 94.66           C  
ATOM    444  O   PRO    54      20.654-106.930 189.837  1.00 94.66           O  
ATOM    445  CB  PRO    54      20.816-104.577 187.774  1.00 94.66           C  
ATOM    446  CG  PRO    54      19.310-104.277 187.815  1.00 94.66           C  
ATOM    447  CD  PRO    54      18.662-105.459 187.075  1.00 94.66           C  
ATOM    448  N   ASN    55      22.649-107.297 188.817  1.00 44.15           N  
ATOM    449  CA  ASN    55      23.180-108.012 189.937  1.00 44.15           C  
ATOM    450  C   ASN    55      24.600-107.577 190.141  1.00 44.15           C  
ATOM    451  O   ASN    55      25.221-106.988 189.258  1.00 44.15           O  
ATOM    452  CB  ASN    55      23.120-109.547 189.771  1.00 44.15           C  
ATOM    453  CG  ASN    55      21.682-109.998 190.048  1.00 44.15           C  
ATOM    454  ND2 ASN    55      21.154-110.945 189.229  1.00 44.15           N  
ATOM    455  OD1 ASN    55      21.044-109.520 190.985  1.00 44.15           O  
ATOM    456  N   VAL    56      25.133-107.832 191.347  1.00 90.55           N  
ATOM    457  CA  VAL    56      26.454-107.446 191.743  1.00 90.55           C  
ATOM    458  C   VAL    56      27.475-108.185 190.932  1.00 90.55           C  
ATOM    459  O   VAL    56      28.510-107.630 190.561  1.00 90.55           O  
ATOM    460  CB  VAL    56      26.700-107.749 193.188  1.00 90.55           C  
ATOM    461  CG1 VAL    56      26.659-109.272 193.388  1.00 90.55           C  
ATOM    462  CG2 VAL    56      28.024-107.093 193.621  1.00 90.55           C  
ATOM    463  N   GLY    57      27.177-109.451 190.603  1.00 37.39           N  
ATOM    464  CA  GLY    57      28.108-110.303 189.928  1.00 37.39           C  
ATOM    465  C   GLY    57      28.518-109.616 188.667  1.00 37.39           C  
ATOM    466  O   GLY    57      29.642-109.779 188.200  1.00 37.39           O  
ATOM    467  N   TYR    58      27.600-108.829 188.086  1.00 87.44           N  
ATOM    468  CA  TYR    58      27.821-108.157 186.840  1.00 87.44           C  
ATOM    469  C   TYR    58      28.957-107.165 186.892  1.00 87.44           C  
ATOM    470  O   TYR    58      29.680-107.034 185.907  1.00 87.44           O  
ATOM    471  CB  TYR    58      26.589-107.388 186.324  1.00 87.44           C  
ATOM    472  CG  TYR    58      25.524-108.313 185.817  1.00 87.44           C  
ATOM    473  CD1 TYR    58      25.575-108.823 184.542  1.00 87.44           C  
ATOM    474  CD2 TYR    58      24.452-108.655 186.616  1.00 87.44           C  
ATOM    475  CE1 TYR    58      24.586-109.657 184.065  1.00 87.44           C  
ATOM    476  CE2 TYR    58      23.462-109.487 186.149  1.00 87.44           C  
ATOM    477  CZ  TYR    58      23.522-109.988 184.872  1.00 87.44           C  
ATOM    478  OH  TYR    58      22.499-110.839 184.397  1.00 87.44           O  
ATOM    479  N   GLY    59      29.159-106.424 188.006  1.00 39.57           N  
ATOM    480  CA  GLY    59      30.156-105.379 188.034  1.00 39.57           C  
ATOM    481  C   GLY    59      31.500-105.907 187.621  1.00 39.57           C  
ATOM    482  O   GLY    59      31.952-106.949 188.094  1.00 39.57           O  
ATOM    483  N   SER    60      32.190-105.151 186.735  1.00 43.52           N  
ATOM    484  CA  SER    60      33.475-105.527 186.223  1.00 43.52           C  
ATOM    485  C   SER    60      34.458-105.481 187.334  1.00 43.52           C  
ATOM    486  O   SER    60      34.329-104.684 188.261  1.00 43.52           O  
ATOM    487  CB  SER    60      33.992-104.578 185.121  1.00 43.52           C  
ATOM    488  OG  SER    60      34.110-103.263 185.637  1.00 43.52           O  
ATOM    489  N   ASP    61      35.511-106.325 187.269  1.00 84.61           N  
ATOM    490  CA  ASP    61      36.346-106.337 188.432  1.00 84.61           C  
ATOM    491  C   ASP    61      37.132-105.070 188.479  1.00 84.61           C  
ATOM    492  O   ASP    61      37.322-104.379 187.479  1.00 84.61           O  
ATOM    493  CB  ASP    61      37.275-107.551 188.606  1.00 84.61           C  
ATOM    494  CG  ASP    61      38.479-107.519 187.681  1.00 84.61           C  
ATOM    495  OD1 ASP    61      38.320-107.493 186.437  1.00 84.61           O  
ATOM    496  OD2 ASP    61      39.607-107.526 188.250  1.00 84.61           O1-
ATOM    497  N   LYS    62      37.625-104.769 189.686  1.00 56.62           N  
ATOM    498  CA  LYS    62      38.247-103.528 190.019  1.00 56.62           C  
ATOM    499  C   LYS    62      39.439-103.279 189.152  1.00 56.62           C  
ATOM    500  O   LYS    62      39.654-102.156 188.702  1.00 56.62           O  
ATOM    501  CB  LYS    62      38.749-103.558 191.467  1.00 56.62           C  
ATOM    502  CG  LYS    62      37.638-103.903 192.452  1.00 56.62           C  
ATOM    503  CD  LYS    62      38.160-104.424 193.793  1.00 56.62           C  
ATOM    504  CE  LYS    62      37.060-104.990 194.690  1.00 56.62           C  
ATOM    505  NZ  LYS    62      37.661-105.804 195.772  1.00 56.62           N1+
ATOM    506  N   LYS    63      40.250-104.316 188.896  1.00114.39           N  
ATOM    507  CA  LYS    63      41.469-104.119 188.161  1.00114.39           C  
ATOM    508  C   LYS    63      41.192-103.660 186.758  1.00114.39           C  
ATOM    509  O   LYS    63      41.850-102.753 186.252  1.00114.39           O  
ATOM    510  CB  LYS    63      42.317-105.405 188.091  1.00114.39           C  
ATOM    511  CG  LYS    63      43.676-105.237 187.406  1.00114.39           C  
ATOM    512  CD  LYS    63      44.670-106.343 187.771  1.00114.39           C  
ATOM    513  CE  LYS    63      45.209-106.189 189.196  1.00114.39           C  
ATOM    514  NZ  LYS    63      45.733-107.479 189.707  1.00114.39           N1+
ATOM    515  N   THR    64      40.212-104.300 186.098  1.00 69.44           N  
ATOM    516  CA  THR    64      39.799-104.070 184.737  1.00 69.44           C  
ATOM    517  C   THR    64      39.083-102.765 184.547  1.00 69.44           C  
ATOM    518  O   THR    64      39.208-102.161 183.483  1.00 69.44           O  
ATOM    519  CB  THR    64      38.821-105.110 184.280  1.00 69.44           C  
ATOM    520  CG2 THR    64      38.347-104.782 182.854  1.00 69.44           C  
ATOM    521  OG1 THR    64      39.410-106.398 184.337  1.00 69.44           O  
ATOM    522  N   ARG    65      38.305-102.312 185.553  1.00 91.39           N  
ATOM    523  CA  ARG    65      37.411-101.189 185.406  1.00 91.39           C  
ATOM    524  C   ARG    65      38.126-100.028 184.801  1.00 91.39           C  
ATOM    525  O   ARG    65      39.284 -99.755 185.110  1.00 91.39           O  
ATOM    526  CB  ARG    65      36.800-100.684 186.726  1.00 91.39           C  
ATOM    527  CG  ARG    65      35.708 -99.616 186.562  1.00 91.39           C  
ATOM    528  CD  ARG    65      35.338 -98.945 187.887  1.00 91.39           C  
ATOM    529  NE  ARG    65      34.106 -98.130 187.693  1.00 91.39           N  
ATOM    530  CZ  ARG    65      33.749 -97.240 188.665  1.00 91.39           C  
ATOM    531  NH1 ARG    65      34.579 -97.040 189.732  1.00 91.39           N1+
ATOM    532  NH2 ARG    65      32.569 -96.560 188.584  1.00 91.39           N  
ATOM    533  N   HIS    66      37.401 -99.310 183.923  1.00 91.49           N  
ATOM    534  CA  HIS    66      37.904 -98.180 183.199  1.00 91.49           C  
ATOM    535  C   HIS    66      39.045 -98.559 182.302  1.00 91.49           C  
ATOM    536  O   HIS    66      40.006 -97.803 182.176  1.00 91.49           O  
ATOM    537  CB  HIS    66      38.419 -97.031 184.086  1.00 91.49           C  
ATOM    538  CG  HIS    66      37.336 -96.303 184.825  1.00 91.49           C  
ATOM    539  CD2 HIS    66      36.062 -96.683 185.114  1.00 91.49           C  
ATOM    540  ND1 HIS    66      37.477 -95.037 185.351  1.00 91.49           N  
ATOM    541  CE1 HIS    66      36.289 -94.716 185.922  1.00 91.49           C  
ATOM    542  NE2 HIS    66      35.399 -95.687 185.801  1.00 91.49           N  
ATOM    543  N   TYR    67      38.989 -99.721 181.625  1.00136.09           N  
ATOM    544  CA  TYR    67      40.086 -99.976 180.735  1.00136.09           C  
ATOM    545  C   TYR    67      39.643-100.080 179.311  1.00136.09           C  
ATOM    546  O   TYR    67      38.725-100.819 178.963  1.00136.09           O  
ATOM    547  CB  TYR    67      40.972-101.165 181.128  1.00136.09           C  
ATOM    548  CG  TYR    67      41.922-100.510 182.053  1.00136.09           C  
ATOM    549  CD1 TYR    67      41.585-100.226 183.357  1.00136.09           C  
ATOM    550  CD2 TYR    67      43.163-100.158 181.577  1.00136.09           C  
ATOM    551  CE1 TYR    67      42.493 -99.596 184.174  1.00136.09           C  
ATOM    552  CE2 TYR    67      44.071 -99.527 182.390  1.00136.09           C  
ATOM    553  CZ  TYR    67      43.734 -99.253 183.692  1.00136.09           C  
ATOM    554  OH  TYR    67      44.667 -98.603 184.524  1.00136.09           O  
ATOM    555  N   LEU    68      40.317 -99.306 178.439  1.00 80.71           N  
ATOM    556  CA  LEU    68      39.988 -99.270 177.044  1.00 80.71           C  
ATOM    557  C   LEU    68      40.547-100.509 176.416  1.00 80.71           C  
ATOM    558  O   LEU    68      41.407-101.167 177.005  1.00 80.71           O  
ATOM    559  CB  LEU    68      40.579 -98.048 176.338  1.00 80.71           C  
ATOM    560  CG  LEU    68      40.229 -96.749 177.095  1.00 80.71           C  
ATOM    561  CD1 LEU    68      40.593 -95.495 176.290  1.00 80.71           C  
ATOM    562  CD2 LEU    68      38.771 -96.753 177.567  1.00 80.71           C  
ATOM    563  N   PRO    69      40.044-100.896 175.273  1.00 70.90           N  
ATOM    564  CA  PRO    69      40.541-102.053 174.577  1.00 70.90           C  
ATOM    565  C   PRO    69      41.979-101.853 174.228  1.00 70.90           C  
ATOM    566  O   PRO    69      42.690-102.843 174.055  1.00 70.90           O  
ATOM    567  CB  PRO    69      39.720-102.144 173.298  1.00 70.90           C  
ATOM    568  CG  PRO    69      39.397-100.667 173.002  1.00 70.90           C  
ATOM    569  CD  PRO    69      39.280-100.024 174.399  1.00 70.90           C  
ATOM    570  N   ASN    70      42.403-100.587 174.060  1.00 82.75           N  
ATOM    571  CA  ASN    70      43.750-100.236 173.694  1.00 82.75           C  
ATOM    572  C   ASN    70      44.669-100.528 174.836  1.00 82.75           C  
ATOM    573  O   ASN    70      45.883-100.628 174.655  1.00 82.75           O  
ATOM    574  CB  ASN    70      43.920 -98.772 173.235  1.00 82.75           C  
ATOM    575  CG  ASN    70      43.620 -97.795 174.361  1.00 82.75           C  
ATOM    576  ND2 ASN    70      43.650 -96.475 174.034  1.00 82.75           N  
ATOM    577  OD1 ASN    70      43.354 -98.180 175.497  1.00 82.75           O  
ATOM    578  N   GLY    71      44.124-100.614 176.061  1.00 46.16           N  
ATOM    579  CA  GLY    71      44.952-100.990 177.176  1.00 46.16           C  
ATOM    580  C   GLY    71      45.217 -99.825 178.074  1.00 46.16           C  
ATOM    581  O   GLY    71      45.822-100.000 179.130  1.00 46.16           O  
ATOM    582  N   PHE    72      44.763 -98.615 177.698  1.00 80.92           N  
ATOM    583  CA  PHE    72      45.025 -97.469 178.524  1.00 80.92           C  
ATOM    584  C   PHE    72      43.777 -97.056 179.230  1.00 80.92           C  
ATOM    585  O   PHE    72      42.667 -97.367 178.804  1.00 80.92           O  
ATOM    586  CB  PHE    72      45.438 -96.202 177.748  1.00 80.92           C  
ATOM    587  CG  PHE    72      46.791 -96.377 177.160  1.00 80.92           C  
ATOM    588  CD1 PHE    72      46.947 -96.919 175.904  1.00 80.92           C  
ATOM    589  CD2 PHE    72      47.904 -95.997 177.871  1.00 80.92           C  
ATOM    590  CE1 PHE    72      48.201 -97.074 175.360  1.00 80.92           C  
ATOM    591  CE2 PHE    72      49.154 -96.150 177.332  1.00 80.92           C  
ATOM    592  CZ  PHE    72      49.306 -96.698 176.078  1.00 80.92           C  
ATOM    593  N   LYS    73      43.958 -96.363 180.370  1.00177.46           N  
ATOM    594  CA  LYS    73      42.874 -95.748 181.068  1.00177.46           C  
ATOM    595  C   LYS    73      42.634 -94.506 180.269  1.00177.46           C  
ATOM    596  O   LYS    73      43.569 -93.965 179.680  1.00177.46           O  
ATOM    597  CB  LYS    73      43.247 -95.381 182.520  1.00177.46           C  
ATOM    598  CG  LYS    73      42.084 -95.026 183.458  1.00177.46           C  
ATOM    599  CD  LYS    73      41.368 -93.719 183.118  1.00177.46           C  
ATOM    600  CE  LYS    73      40.480 -93.193 184.250  1.00177.46           C  
ATOM    601  NZ  LYS    73      41.286 -93.004 185.477  1.00177.46           N1+
ATOM    602  N   LYS    74      41.379 -94.033 180.202  1.00137.88           N  
ATOM    603  CA  LYS    74      41.101 -92.932 179.332  1.00137.88           C  
ATOM    604  C   LYS    74      41.117 -91.644 180.090  1.00137.88           C  
ATOM    605  O   LYS    74      40.447 -91.495 181.111  1.00137.88           O  
ATOM    606  CB  LYS    74      39.757 -93.085 178.606  1.00137.88           C  
ATOM    607  CG  LYS    74      38.542 -93.142 179.526  1.00137.88           C  
ATOM    608  CD  LYS    74      37.236 -93.270 178.737  1.00137.88           C  
ATOM    609  CE  LYS    74      37.253 -92.505 177.416  1.00137.88           C  
ATOM    610  NZ  LYS    74      35.969 -92.700 176.704  1.00137.88           N1+
ATOM    611  N   PHE    75      41.908 -90.671 179.592  1.00110.23           N  
ATOM    612  CA  PHE    75      41.966 -89.394 180.231  1.00110.23           C  
ATOM    613  C   PHE    75      41.490 -88.411 179.199  1.00110.23           C  
ATOM    614  O   PHE    75      41.857 -88.478 178.026  1.00110.23           O  
ATOM    615  CB  PHE    75      43.382 -89.045 180.736  1.00110.23           C  
ATOM    616  CG  PHE    75      43.287 -87.953 181.747  1.00110.23           C  
ATOM    617  CD1 PHE    75      43.128 -88.251 183.088  1.00110.23           C  
ATOM    618  CD2 PHE    75      43.352 -86.637 181.366  1.00110.23           C  
ATOM    619  CE1 PHE    75      43.038 -87.257 184.031  1.00110.23           C  
ATOM    620  CE2 PHE    75      43.261 -85.638 182.304  1.00110.23           C  
ATOM    621  CZ  PHE    75      43.106 -85.941 183.638  1.00110.23           C  
ATOM    622  N   ILE    76      40.630 -87.468 179.623  1.00126.15           N  
ATOM    623  CA  ILE    76      39.991 -86.587 178.690  1.00126.15           C  
ATOM    624  C   ILE    76      40.566 -85.215 178.815  1.00126.15           C  
ATOM    625  O   ILE    76      40.670 -84.665 179.910  1.00126.15           O  
ATOM    626  CB  ILE    76      38.490 -86.586 178.870  1.00126.15           C  
ATOM    627  CG1 ILE    76      37.795 -85.583 177.936  1.00126.15           C  
ATOM    628  CG2 ILE    76      38.171 -86.451 180.366  1.00126.15           C  
ATOM    629  CD1 ILE    76      36.266 -85.688 177.936  1.00126.15           C  
ATOM    630  N   VAL    77      40.979 -84.641 177.663  1.00139.63           N  
ATOM    631  CA  VAL    77      41.615 -83.361 177.648  1.00139.63           C  
ATOM    632  C   VAL    77      40.648 -82.282 177.266  1.00139.63           C  
ATOM    633  O   VAL    77      40.181 -82.197 176.127  1.00139.63           O  
ATOM    634  CB  VAL    77      42.813 -83.294 176.745  1.00139.63           C  
ATOM    635  CG1 VAL    77      43.873 -84.251 177.315  1.00139.63           C  
ATOM    636  CG2 VAL    77      42.381 -83.607 175.303  1.00139.63           C  
ATOM    637  N   HIS    78      40.251 -81.480 178.279  1.00102.08           N  
ATOM    638  CA  HIS    78      39.407 -80.340 178.061  1.00102.08           C  
ATOM    639  C   HIS    78      40.209 -79.204 177.514  1.00102.08           C  
ATOM    640  O   HIS    78      39.884 -78.624 176.479  1.00102.08           O  
ATOM    641  CB  HIS    78      38.772 -79.785 179.351  1.00102.08           C  
ATOM    642  CG  HIS    78      37.929 -80.759 180.116  1.00102.08           C  
ATOM    643  CD2 HIS    78      36.681 -81.243 179.856  1.00102.08           C  
ATOM    644  ND1 HIS    78      38.311 -81.335 181.305  1.00102.08           N  
ATOM    645  CE1 HIS    78      37.289 -82.131 181.707  1.00102.08           C  
ATOM    646  NE2 HIS    78      36.279 -82.109 180.857  1.00102.08           N  
ATOM    647  N   ASN    79      41.314 -78.877 178.216  1.00 72.16           N  
ATOM    648  CA  ASN    79      42.143 -77.770 177.847  1.00 72.16           C  
ATOM    649  C   ASN    79      43.522 -78.296 177.653  1.00 72.16           C  
ATOM    650  O   ASN    79      43.793 -79.475 177.864  1.00 72.16           O  
ATOM    651  CB  ASN    79      42.181 -76.618 178.876  1.00 72.16           C  
ATOM    652  CG  ASN    79      42.675 -77.110 180.233  1.00 72.16           C  
ATOM    653  ND2 ASN    79      43.059 -76.150 181.118  1.00 72.16           N  
ATOM    654  OD1 ASN    79      42.695 -78.306 180.509  1.00 72.16           O  
ATOM    655  N   THR    80      44.428 -77.404 177.226  1.00117.79           N  
ATOM    656  CA  THR    80      45.784 -77.737 176.924  1.00117.79           C  
ATOM    657  C   THR    80      46.489 -78.270 178.138  1.00117.79           C  
ATOM    658  O   THR    80      47.238 -79.240 178.043  1.00117.79           O  
ATOM    659  CB  THR    80      46.530 -76.536 176.408  1.00117.79           C  
ATOM    660  CG2 THR    80      46.428 -75.390 177.426  1.00117.79           C  
ATOM    661  OG1 THR    80      47.881 -76.867 176.129  1.00117.79           O  
ATOM    662  N   SER    81      46.223 -77.686 179.318  1.00 81.81           N  
ATOM    663  CA  SER    81      46.936 -77.997 180.525  1.00 81.81           C  
ATOM    664  C   SER    81      46.866 -79.459 180.856  1.00 81.81           C  
ATOM    665  O   SER    81      47.851 -80.042 181.308  1.00 81.81           O  
ATOM    666  CB  SER    81      46.383 -77.223 181.739  1.00 81.81           C  
ATOM    667  OG  SER    81      47.085 -77.566 182.924  1.00 81.81           O  
ATOM    668  N   GLU    82      45.728 -80.116 180.595  1.00 88.33           N  
ATOM    669  CA  GLU    82      45.580 -81.476 181.024  1.00 88.33           C  
ATOM    670  C   GLU    82      46.634 -82.334 180.408  1.00 88.33           C  
ATOM    671  O   GLU    82      47.094 -83.293 181.030  1.00 88.33           O  
ATOM    672  CB  GLU    82      44.216 -82.080 180.663  1.00 88.33           C  
ATOM    673  CG  GLU    82      43.064 -81.465 181.460  1.00 88.33           C  
ATOM    674  CD  GLU    82      43.150 -81.950 182.906  1.00 88.33           C  
ATOM    675  OE1 GLU    82      43.987 -82.846 183.187  1.00 88.33           O  
ATOM    676  OE2 GLU    82      42.371 -81.429 183.751  1.00 88.33           O1-
ATOM    677  N   LEU    83      47.068 -82.004 179.182  1.00 88.22           N  
ATOM    678  CA  LEU    83      47.970 -82.883 178.510  1.00 88.22           C  
ATOM    679  C   LEU    83      49.221 -83.044 179.334  1.00 88.22           C  
ATOM    680  O   LEU    83      49.704 -84.157 179.531  1.00 88.22           O  
ATOM    681  CB  LEU    83      48.349 -82.408 177.104  1.00 88.22           C  
ATOM    682  CG  LEU    83      49.049 -83.521 176.300  1.00 88.22           C  
ATOM    683  CD1 LEU    83      48.068 -84.651 175.952  1.00 88.22           C  
ATOM    684  CD2 LEU    83      49.785 -82.965 175.081  1.00 88.22           C  
ATOM    685  N   GLU    84      49.722 -81.945 179.924  1.00105.59           N  
ATOM    686  CA  GLU    84      50.978 -81.936 180.625  1.00105.59           C  
ATOM    687  C   GLU    84      50.940 -82.943 181.743  1.00105.59           C  
ATOM    688  O   GLU    84      51.941 -83.601 182.028  1.00105.59           O  
ATOM    689  CB  GLU    84      51.263 -80.577 181.287  1.00105.59           C  
ATOM    690  CG  GLU    84      51.037 -79.367 180.376  1.00105.59           C  
ATOM    691  CD  GLU    84      51.746 -79.568 179.048  1.00105.59           C  
ATOM    692  OE1 GLU    84      52.818 -80.231 179.033  1.00105.59           O  
ATOM    693  OE2 GLU    84      51.216 -79.055 178.027  1.00105.59           O1-
ATOM    694  N   LEU    85      49.776 -83.107 182.400  1.00 94.61           N  
ATOM    695  CA  LEU    85      49.669 -84.002 183.524  1.00 94.61           C  
ATOM    696  C   LEU    85      50.012 -85.383 183.079  1.00 94.61           C  
ATOM    697  O   LEU    85      50.526 -86.190 183.852  1.00 94.61           O  
ATOM    698  CB  LEU    85      48.261 -84.076 184.150  1.00 94.61           C  
ATOM    699  CG  LEU    85      47.851 -82.850 184.989  1.00 94.61           C  
ATOM    700  CD1 LEU    85      47.773 -81.574 184.144  1.00 94.61           C  
ATOM    701  CD2 LEU    85      46.536 -83.122 185.739  1.00 94.61           C  
ATOM    702  N   LEU    86      49.746 -85.684 181.803  1.00 84.54           N  
ATOM    703  CA  LEU    86      49.961 -86.988 181.254  1.00 84.54           C  
ATOM    704  C   LEU    86      51.411 -87.333 181.353  1.00 84.54           C  
ATOM    705  O   LEU    86      51.752 -88.500 181.252  1.00 84.54           O  
ATOM    706  CB  LEU    86      49.569 -87.075 179.768  1.00 84.54           C  
ATOM    707  CG  LEU    86      48.067 -86.853 179.507  1.00 84.54           C  
ATOM    708  CD1 LEU    86      47.741 -86.975 178.008  1.00 84.54           C  
ATOM    709  CD2 LEU    86      47.197 -87.772 180.383  1.00 84.54           C  
ATOM    710  N   MET    87      52.318 -86.354 181.495  1.00 87.26           N  
ATOM    711  CA  MET    87      53.725 -86.664 181.463  1.00 87.26           C  
ATOM    712  C   MET    87      54.129 -87.647 182.531  1.00 87.26           C  
ATOM    713  O   MET    87      54.807 -88.630 182.233  1.00 87.26           O  
ATOM    714  CB  MET    87      54.600 -85.414 181.658  1.00 87.26           C  
ATOM    715  CG  MET    87      56.098 -85.722 181.623  1.00 87.26           C  
ATOM    716  SD  MET    87      57.185 -84.272 181.797  1.00 87.26           S  
ATOM    717  CE  MET    87      57.052 -83.687 180.081  1.00 87.26           C  
ATOM    718  N   MET    88      53.744 -87.424 183.802  1.00 45.05           N  
ATOM    719  CA  MET    88      54.133 -88.370 184.814  1.00 45.05           C  
ATOM    720  C   MET    88      53.425 -89.662 184.551  1.00 45.05           C  
ATOM    721  O   MET    88      53.995 -90.740 184.706  1.00 45.05           O  
ATOM    722  CB  MET    88      53.767 -87.942 186.248  1.00 45.05           C  
ATOM    723  CG  MET    88      54.634 -86.813 186.808  1.00 45.05           C  
ATOM    724  SD  MET    88      54.270 -86.391 188.538  1.00 45.05           S  
ATOM    725  CE  MET    88      55.000 -87.919 189.191  1.00 45.05           C  
ATOM    726  N   HIS    89      52.153 -89.537 184.138  1.00123.57           N  
ATOM    727  CA  HIS    89      51.139 -90.528 183.882  1.00123.57           C  
ATOM    728  C   HIS    89      51.328 -91.315 182.606  1.00123.57           C  
ATOM    729  O   HIS    89      50.610 -92.286 182.383  1.00123.57           O  
ATOM    730  CB  HIS    89      49.733 -89.912 183.761  1.00123.57           C  
ATOM    731  CG  HIS    89      49.177 -89.358 185.040  1.00123.57           C  
ATOM    732  CD2 HIS    89      49.268 -88.106 185.568  1.00123.57           C  
ATOM    733  ND1 HIS    89      48.407 -90.083 185.918  1.00123.57           N  
ATOM    734  CE1 HIS    89      48.066 -89.239 186.930  1.00123.57           C  
ATOM    735  NE2 HIS    89      48.568 -88.029 186.756  1.00123.57           N  
ATOM    736  N   ASN    90      52.285 -90.948 181.739  1.00 89.48           N  
ATOM    737  CA  ASN    90      52.281 -91.313 180.345  1.00 89.48           C  
ATOM    738  C   ASN    90      52.025 -92.769 180.085  1.00 89.48           C  
ATOM    739  O   ASN    90      51.324 -93.104 179.131  1.00 89.48           O  
ATOM    740  CB  ASN    90      53.574 -90.908 179.621  1.00 89.48           C  
ATOM    741  CG  ASN    90      53.406 -91.193 178.133  1.00 89.48           C  
ATOM    742  ND2 ASN    90      54.252 -92.112 177.602  1.00 89.48           N  
ATOM    743  OD1 ASN    90      52.548 -90.622 177.464  1.00 89.48           O  
ATOM    744  N   ARG    91      52.599 -93.686 180.870  1.00115.77           N  
ATOM    745  CA  ARG    91      52.400 -95.085 180.609  1.00115.77           C  
ATOM    746  C   ARG    91      50.993 -95.533 180.909  1.00115.77           C  
ATOM    747  O   ARG    91      50.461 -96.419 180.238  1.00115.77           O  
ATOM    748  CB  ARG    91      53.345 -95.944 181.444  1.00115.77           C  
ATOM    749  CG  ARG    91      54.813 -95.602 181.208  1.00115.77           C  
ATOM    750  CD  ARG    91      55.740 -96.468 182.047  1.00115.77           C  
ATOM    751  NE  ARG    91      55.638 -97.838 181.478  1.00115.77           N  
ATOM    752  CZ  ARG    91      55.752 -98.931 182.284  1.00115.77           C  
ATOM    753  NH1 ARG    91      55.915 -98.789 183.631  1.00115.77           N1+
ATOM    754  NH2 ARG    91      55.689-100.178 181.734  1.00115.77           N  
ATOM    755  N   THR    92      50.394 -94.985 181.986  1.00 66.93           N  
ATOM    756  CA  THR    92      49.098 -95.374 182.484  1.00 66.93           C  
ATOM    757  C   THR    92      47.950 -94.978 181.610  1.00 66.93           C  
ATOM    758  O   THR    92      47.074 -95.798 181.331  1.00 66.93           O  
ATOM    759  CB  THR    92      48.811 -94.761 183.819  1.00 66.93           C  
ATOM    760  CG2 THR    92      47.401 -95.181 184.273  1.00 66.93           C  
ATOM    761  OG1 THR    92      49.789 -95.180 184.758  1.00 66.93           O  
ATOM    762  N   TYR    93      47.932 -93.719 181.125  1.00149.17           N  
ATOM    763  CA  TYR    93      46.730 -93.236 180.507  1.00149.17           C  
ATOM    764  C   TYR    93      46.985 -92.853 179.087  1.00149.17           C  
ATOM    765  O   TYR    93      48.122 -92.730 178.634  1.00149.17           O  
ATOM    766  CB  TYR    93      46.162 -91.972 181.187  1.00149.17           C  
ATOM    767  CG  TYR    93      45.802 -92.268 182.610  1.00149.17           C  
ATOM    768  CD1 TYR    93      44.542 -92.720 182.938  1.00149.17           C  
ATOM    769  CD2 TYR    93      46.721 -92.093 183.618  1.00149.17           C  
ATOM    770  CE1 TYR    93      44.207 -92.987 184.246  1.00149.17           C  
ATOM    771  CE2 TYR    93      46.391 -92.358 184.925  1.00149.17           C  
ATOM    772  CZ  TYR    93      45.135 -92.809 185.245  1.00149.17           C  
ATOM    773  OH  TYR    93      44.797 -93.081 186.591  1.00149.17           O  
ATOM    774  N   CYS    94      45.881 -92.721 178.324  1.00 52.65           N  
ATOM    775  CA  CYS    94      45.957 -92.286 176.962  1.00 52.65           C  
ATOM    776  C   CYS    94      45.183 -91.017 176.885  1.00 52.65           C  
ATOM    777  O   CYS    94      44.222 -90.805 177.624  1.00 52.65           O  
ATOM    778  CB  CYS    94      45.286 -93.239 175.973  1.00 52.65           C  
ATOM    779  SG  CYS    94      43.528 -93.461 176.375  1.00 52.65           S  
ATOM    780  N   ALA    95      45.606 -90.122 175.979  1.00 52.47           N  
ATOM    781  CA  ALA    95      44.954 -88.864 175.821  1.00 52.47           C  
ATOM    782  C   ALA    95      43.730 -89.023 174.980  1.00 52.47           C  
ATOM    783  O   ALA    95      43.653 -89.866 174.087  1.00 52.47           O  
ATOM    784  CB  ALA    95      45.877 -87.811 175.179  1.00 52.47           C  
ATOM    785  N   GLU    96      42.709 -88.205 175.299  1.00 87.91           N  
ATOM    786  CA  GLU    96      41.497 -88.150 174.540  1.00 87.91           C  
ATOM    787  C   GLU    96      41.190 -86.695 174.447  1.00 87.91           C  
ATOM    788  O   GLU    96      41.014 -86.028 175.456  1.00 87.91           O  
ATOM    789  CB  GLU    96      40.333 -88.857 175.244  1.00 87.91           C  
ATOM    790  CG  GLU    96      39.097 -89.021 174.366  1.00 87.91           C  
ATOM    791  CD  GLU    96      38.177 -90.012 175.061  1.00 87.91           C  
ATOM    792  OE1 GLU    96      38.267 -90.124 176.315  1.00 87.91           O  
ATOM    793  OE2 GLU    96      37.377 -90.671 174.352  1.00 87.91           O1-
ATOM    794  N   ILE    97      41.107 -86.178 173.210  1.00129.18           N  
ATOM    795  CA  ILE    97      40.950 -84.776 172.951  1.00129.18           C  
ATOM    796  C   ILE    97      39.485 -84.518 172.780  1.00129.18           C  
ATOM    797  O   ILE    97      38.813 -85.191 172.003  1.00129.18           O  
ATOM    798  CB  ILE    97      41.649 -84.413 171.671  1.00129.18           C  
ATOM    799  CG1 ILE    97      43.137 -84.806 171.735  1.00129.18           C  
ATOM    800  CG2 ILE    97      41.419 -82.925 171.385  1.00129.18           C  
ATOM    801  CD1 ILE    97      43.941 -84.096 172.822  1.00129.18           C  
ATOM    802  N   ALA    98      38.955 -83.509 173.496  1.00 46.79           N  
ATOM    803  CA  ALA    98      37.542 -83.268 173.476  1.00 46.79           C  
ATOM    804  C   ALA    98      37.109 -82.779 172.131  1.00 46.79           C  
ATOM    805  O   ALA    98      37.897 -82.275 171.334  1.00 46.79           O  
ATOM    806  CB  ALA    98      37.065 -82.278 174.549  1.00 46.79           C  
ATOM    807  N   HIS    99      35.812 -82.971 171.841  1.00 47.88           N  
ATOM    808  CA  HIS    99      35.223 -82.584 170.594  1.00 47.88           C  
ATOM    809  C   HIS    99      35.197 -81.089 170.489  1.00 47.88           C  
ATOM    810  O   HIS    99      35.283 -80.541 169.393  1.00 47.88           O  
ATOM    811  CB  HIS    99      33.788 -83.090 170.423  1.00 47.88           C  
ATOM    812  CG  HIS    99      32.859 -82.610 171.493  1.00 47.88           C  
ATOM    813  CD2 HIS    99      32.067 -81.496 171.533  1.00 47.88           C  
ATOM    814  ND1 HIS    99      32.629 -83.271 172.675  1.00 47.88           N  
ATOM    815  CE1 HIS    99      31.718 -82.543 173.366  1.00 47.88           C  
ATOM    816  NE2 HIS    99      31.349 -81.458 172.706  1.00 47.88           N  
ATOM    817  N   ASN   100      35.071 -80.393 171.633  1.00 60.76           N  
ATOM    818  CA  ASN   100      34.930 -78.965 171.648  1.00 60.76           C  
ATOM    819  C   ASN   100      36.128 -78.305 171.028  1.00 60.76           C  
ATOM    820  O   ASN   100      35.999 -77.236 170.433  1.00 60.76           O  
ATOM    821  CB  ASN   100      34.735 -78.371 173.064  1.00 60.76           C  
ATOM    822  CG  ASN   100      35.991 -78.524 173.919  1.00 60.76           C  
ATOM    823  ND2 ASN   100      36.349 -77.433 174.650  1.00 60.76           N  
ATOM    824  OD1 ASN   100      36.624 -79.577 173.950  1.00 60.76           O  
ATOM    825  N   ILE   101      37.322 -78.915 171.150  1.00 81.27           N  
ATOM    826  CA  ILE   101      38.556 -78.337 170.677  1.00 81.27           C  
ATOM    827  C   ILE   101      38.568 -78.161 169.183  1.00 81.27           C  
ATOM    828  O   ILE   101      38.255 -79.082 168.432  1.00 81.27           O  
ATOM    829  CB  ILE   101      39.756 -79.185 170.987  1.00 81.27           C  
ATOM    830  CG1 ILE   101      39.935 -79.346 172.502  1.00 81.27           C  
ATOM    831  CG2 ILE   101      40.967 -78.551 170.287  1.00 81.27           C  
ATOM    832  CD1 ILE   101      40.951 -80.426 172.873  1.00 81.27           C  
ATOM    833  N   SER   102      38.999 -76.960 168.723  1.00 90.17           N  
ATOM    834  CA  SER   102      39.059 -76.613 167.320  1.00 90.17           C  
ATOM    835  C   SER   102      40.160 -77.377 166.659  1.00 90.17           C  
ATOM    836  O   SER   102      41.010 -77.972 167.318  1.00 90.17           O  
ATOM    837  CB  SER   102      39.371 -75.137 167.027  1.00 90.17           C  
ATOM    838  OG  SER   102      38.277 -74.305 167.390  1.00 90.17           O  
ATOM    839  N   THR   103      40.159 -77.372 165.307  1.00105.06           N  
ATOM    840  CA  THR   103      41.128 -78.115 164.547  1.00105.06           C  
ATOM    841  C   THR   103      42.514 -77.582 164.753  1.00105.06           C  
ATOM    842  O   THR   103      43.449 -78.364 164.916  1.00105.06           O  
ATOM    843  CB  THR   103      40.861 -78.170 163.068  1.00105.06           C  
ATOM    844  CG2 THR   103      39.565 -78.964 162.828  1.00105.06           C  
ATOM    845  OG1 THR   103      40.768 -76.866 162.513  1.00105.06           O  
ATOM    846  N   LYS   104      42.704 -76.248 164.763  1.00 73.42           N  
ATOM    847  CA  LYS   104      44.045 -75.761 164.908  1.00 73.42           C  
ATOM    848  C   LYS   104      44.592 -76.227 166.218  1.00 73.42           C  
ATOM    849  O   LYS   104      45.716 -76.719 166.298  1.00 73.42           O  
ATOM    850  CB  LYS   104      44.160 -74.225 164.882  1.00 73.42           C  
ATOM    851  CG  LYS   104      43.965 -73.605 163.492  1.00 73.42           C  
ATOM    852  CD  LYS   104      42.510 -73.546 163.031  1.00 73.42           C  
ATOM    853  CE  LYS   104      42.326 -72.923 161.644  1.00 73.42           C  
ATOM    854  NZ  LYS   104      40.978 -72.322 161.538  1.00 73.42           N1+
ATOM    855  N   LYS   105      43.799 -76.097 167.291  1.00 87.31           N  
ATOM    856  CA  LYS   105      44.270 -76.501 168.581  1.00 87.31           C  
ATOM    857  C   LYS   105      44.402 -77.988 168.627  1.00 87.31           C  
ATOM    858  O   LYS   105      45.172 -78.521 169.426  1.00 87.31           O  
ATOM    859  CB  LYS   105      43.412 -75.964 169.732  1.00 87.31           C  
ATOM    860  CG  LYS   105      43.602 -74.447 169.877  1.00 87.31           C  
ATOM    861  CD  LYS   105      42.580 -73.774 170.784  1.00 87.31           C  
ATOM    862  CE  LYS   105      42.539 -74.374 172.189  1.00 87.31           C  
ATOM    863  NZ  LYS   105      41.556 -73.649 173.020  1.00 87.31           N1+
ATOM    864  N   ARG   106      43.605 -78.709 167.815  1.00 92.28           N  
ATOM    865  CA  ARG   106      43.703 -80.142 167.807  1.00 92.28           C  
ATOM    866  C   ARG   106      45.055 -80.536 167.307  1.00 92.28           C  
ATOM    867  O   ARG   106      45.754 -81.328 167.936  1.00 92.28           O  
ATOM    868  CB  ARG   106      42.665 -80.802 166.885  1.00 92.28           C  
ATOM    869  CG  ARG   106      42.466 -82.297 167.149  1.00 92.28           C  
ATOM    870  CD  ARG   106      41.361 -82.911 166.287  1.00 92.28           C  
ATOM    871  NE  ARG   106      41.000 -84.234 166.872  1.00 92.28           N  
ATOM    872  CZ  ARG   106      39.695 -84.477 167.193  1.00 92.28           C  
ATOM    873  NH1 ARG   106      38.769 -83.485 167.041  1.00 92.28           N1+
ATOM    874  NH2 ARG   106      39.317 -85.698 167.670  1.00 92.28           N  
ATOM    875  N   LYS   107      45.493 -79.972 166.164  1.00103.46           N  
ATOM    876  CA  LYS   107      46.767 -80.405 165.673  1.00103.46           C  
ATOM    877  C   LYS   107      47.811 -79.957 166.638  1.00103.46           C  
ATOM    878  O   LYS   107      48.826 -80.623 166.828  1.00103.46           O  
ATOM    879  CB  LYS   107      47.142 -79.914 164.268  1.00103.46           C  
ATOM    880  CG  LYS   107      48.375 -80.662 163.748  1.00103.46           C  
ATOM    881  CD  LYS   107      48.582 -80.577 162.238  1.00103.46           C  
ATOM    882  CE  LYS   107      49.733 -81.457 161.744  1.00103.46           C  
ATOM    883  NZ  LYS   107      50.998 -81.021 162.376  1.00103.46           N1+
ATOM    884  N   ALA   108      47.602 -78.796 167.276  1.00 30.47           N  
ATOM    885  CA  ALA   108      48.605 -78.346 168.192  1.00 30.47           C  
ATOM    886  C   ALA   108      48.743 -79.354 169.294  1.00 30.47           C  
ATOM    887  O   ALA   108      49.851 -79.746 169.655  1.00 30.47           O  
ATOM    888  CB  ALA   108      48.261 -76.983 168.818  1.00 30.47           C  
ATOM    889  N   ILE   109      47.614 -79.837 169.838  1.00110.89           N  
ATOM    890  CA  ILE   109      47.652 -80.768 170.928  1.00110.89           C  
ATOM    891  C   ILE   109      48.229 -82.084 170.488  1.00110.89           C  
ATOM    892  O   ILE   109      48.821 -82.799 171.295  1.00110.89           O  
ATOM    893  CB  ILE   109      46.319 -80.956 171.586  1.00110.89           C  
ATOM    894  CG1 ILE   109      46.493 -81.628 172.954  1.00110.89           C  
ATOM    895  CG2 ILE   109      45.389 -81.711 170.632  1.00110.89           C  
ATOM    896  CD1 ILE   109      45.251 -81.469 173.824  1.00110.89           C  
ATOM    897  N   VAL   110      48.003 -82.501 169.225  1.00113.06           N  
ATOM    898  CA  VAL   110      48.566 -83.758 168.815  1.00113.06           C  
ATOM    899  C   VAL   110      50.060 -83.656 168.768  1.00113.06           C  
ATOM    900  O   VAL   110      50.765 -84.580 169.175  1.00113.06           O  
ATOM    901  CB  VAL   110      48.051 -84.270 167.501  1.00113.06           C  
ATOM    902  CG1 VAL   110      46.548 -84.528 167.670  1.00113.06           C  
ATOM    903  CG2 VAL   110      48.392 -83.283 166.377  1.00113.06           C  
ATOM    904  N   GLU   111      50.596 -82.524 168.274  1.00 70.40           N  
ATOM    905  CA  GLU   111      52.020 -82.395 168.221  1.00 70.40           C  
ATOM    906  C   GLU   111      52.527 -82.440 169.619  1.00 70.40           C  
ATOM    907  O   GLU   111      53.501 -83.127 169.930  1.00 70.40           O  
ATOM    908  CB  GLU   111      52.489 -81.062 167.627  1.00 70.40           C  
ATOM    909  CG  GLU   111      53.978 -80.801 167.850  1.00 70.40           C  
ATOM    910  CD  GLU   111      54.786 -81.739 166.966  1.00 70.40           C  
ATOM    911  OE1 GLU   111      54.213 -82.754 166.490  1.00 70.40           O  
ATOM    912  OE2 GLU   111      55.994 -81.446 166.757  1.00 70.40           O1-
ATOM    913  N   ARG   112      51.829 -81.728 170.516  1.00156.81           N  
ATOM    914  CA  ARG   112      52.249 -81.629 171.877  1.00156.81           C  
ATOM    915  C   ARG   112      52.292 -83.004 172.438  1.00156.81           C  
ATOM    916  O   ARG   112      53.158 -83.326 173.250  1.00156.81           O  
ATOM    917  CB  ARG   112      51.268 -80.821 172.737  1.00156.81           C  
ATOM    918  CG  ARG   112      51.646 -80.848 174.214  1.00156.81           C  
ATOM    919  CD  ARG   112      53.046 -80.309 174.490  1.00156.81           C  
ATOM    920  NE  ARG   112      52.915 -78.843 174.690  1.00156.81           N  
ATOM    921  CZ  ARG   112      53.642 -78.234 175.668  1.00156.81           C  
ATOM    922  NH1 ARG   112      54.498 -78.973 176.433  1.00156.81           N1+
ATOM    923  NH2 ARG   112      53.504 -76.892 175.887  1.00156.81           N  
ATOM    924  N   ALA   113      51.324 -83.838 172.028  1.00 40.46           N  
ATOM    925  CA  ALA   113      51.237 -85.182 172.507  1.00 40.46           C  
ATOM    926  C   ALA   113      52.448 -85.943 172.076  1.00 40.46           C  
ATOM    927  O   ALA   113      53.078 -86.614 172.890  1.00 40.46           O  
ATOM    928  CB  ALA   113      50.011 -85.926 171.952  1.00 40.46           C  
ATOM    929  N   SER   114      52.838 -85.825 170.793  1.00 73.28           N  
ATOM    930  CA  SER   114      53.957 -86.581 170.306  1.00 73.28           C  
ATOM    931  C   SER   114      55.155 -86.168 171.101  1.00 73.28           C  
ATOM    932  O   SER   114      55.996 -87.001 171.438  1.00 73.28           O  
ATOM    933  CB  SER   114      54.304 -86.297 168.833  1.00 73.28           C  
ATOM    934  OG  SER   114      53.250 -86.720 167.976  1.00 73.28           O  
ATOM    935  N   GLN   115      55.256 -84.863 171.424  1.00 47.08           N  
ATOM    936  CA  GLN   115      56.397 -84.377 172.148  1.00 47.08           C  
ATOM    937  C   GLN   115      56.437 -85.022 173.491  1.00 47.08           C  
ATOM    938  O   GLN   115      57.469 -85.532 173.920  1.00 47.08           O  
ATOM    939  CB  GLN   115      56.328 -82.862 172.434  1.00 47.08           C  
ATOM    940  CG  GLN   115      56.365 -81.980 171.185  1.00 47.08           C  
ATOM    941  CD  GLN   115      56.168 -80.527 171.603  1.00 47.08           C  
ATOM    942  NE2 GLN   115      56.586 -79.589 170.712  1.00 47.08           N  
ATOM    943  OE1 GLN   115      55.650 -80.230 172.679  1.00 47.08           O  
ATOM    944  N   LEU   116      55.285 -85.022 174.174  1.00100.68           N  
ATOM    945  CA  LEU   116      55.096 -85.537 175.498  1.00100.68           C  
ATOM    946  C   LEU   116      55.146 -87.040 175.453  1.00100.68           C  
ATOM    947  O   LEU   116      55.206 -87.689 176.496  1.00100.68           O  
ATOM    948  CB  LEU   116      53.780 -85.040 176.142  1.00100.68           C  
ATOM    949  CG  LEU   116      53.680 -83.492 176.265  1.00100.68           C  
ATOM    950  CD1 LEU   116      52.403 -83.063 177.012  1.00100.68           C  
ATOM    951  CD2 LEU   116      54.943 -82.859 176.869  1.00100.68           C  
ATOM    952  N   ASP   117      55.069 -87.616 174.232  1.00140.74           N  
ATOM    953  CA  ASP   117      55.015 -89.023 173.923  1.00140.74           C  
ATOM    954  C   ASP   117      53.811 -89.669 174.540  1.00140.74           C  
ATOM    955  O   ASP   117      53.882 -90.754 175.116  1.00140.74           O  
ATOM    956  CB  ASP   117      56.316 -89.814 174.189  1.00140.74           C  
ATOM    957  CG  ASP   117      56.725 -89.796 175.655  1.00140.74           C  
ATOM    958  OD1 ASP   117      55.905 -90.185 176.525  1.00140.74           O  
ATOM    959  OD2 ASP   117      57.880 -89.368 175.925  1.00140.74           O1-
ATOM    960  N   VAL   118      52.646 -89.001 174.377  1.00 60.40           N  
ATOM    961  CA  VAL   118      51.381 -89.466 174.891  1.00 60.40           C  
ATOM    962  C   VAL   118      50.609 -90.123 173.777  1.00 60.40           C  
ATOM    963  O   VAL   118      50.672 -89.704 172.622  1.00 60.40           O  
ATOM    964  CB  VAL   118      50.488 -88.360 175.403  1.00 60.40           C  
ATOM    965  CG1 VAL   118      49.147 -88.964 175.863  1.00 60.40           C  
ATOM    966  CG2 VAL   118      51.231 -87.563 176.487  1.00 60.40           C  
ATOM    967  N   VAL   119      49.847 -91.191 174.113  1.00 52.77           N  
ATOM    968  CA  VAL   119      49.055 -91.930 173.157  1.00 52.77           C  
ATOM    969  C   VAL   119      47.719 -91.272 173.002  1.00 52.77           C  
ATOM    970  O   VAL   119      47.079 -90.926 173.987  1.00 52.77           O  
ATOM    971  CB  VAL   119      48.758 -93.339 173.586  1.00 52.77           C  
ATOM    972  CG1 VAL   119      47.772 -93.960 172.579  1.00 52.77           C  
ATOM    973  CG2 VAL   119      50.079 -94.115 173.738  1.00 52.77           C  
ATOM    974  N   VAL   120      47.247 -91.106 171.745  1.00119.46           N  
ATOM    975  CA  VAL   120      45.981 -90.463 171.527  1.00119.46           C  
ATOM    976  C   VAL   120      45.071 -91.376 170.775  1.00119.46           C  
ATOM    977  O   VAL   120      45.355 -91.802 169.655  1.00119.46           O  
ATOM    978  CB  VAL   120      46.131 -89.201 170.748  1.00119.46           C  
ATOM    979  CG1 VAL   120      47.037 -89.511 169.549  1.00119.46           C  
ATOM    980  CG2 VAL   120      44.730 -88.701 170.353  1.00119.46           C  
ATOM    981  N   SER   121      43.931 -91.694 171.420  1.00103.95           N  
ATOM    982  CA  SER   121      42.899 -92.533 170.894  1.00103.95           C  
ATOM    983  C   SER   121      42.256 -91.850 169.745  1.00103.95           C  
ATOM    984  O   SER   121      42.151 -92.417 168.657  1.00103.95           O  
ATOM    985  CB  SER   121      41.803 -92.789 171.937  1.00103.95           C  
ATOM    986  OG  SER   121      40.736 -93.535 171.364  1.00103.95           O  
ATOM    987  N   ASN   122      41.812 -90.594 169.958  1.00139.44           N  
ATOM    988  CA  ASN   122      41.093 -89.944 168.906  1.00139.44           C  
ATOM    989  C   ASN   122      41.993 -89.054 168.118  1.00139.44           C  
ATOM    990  O   ASN   122      41.568 -88.014 167.620  1.00139.44           O  
ATOM    991  CB  ASN   122      39.858 -89.181 169.413  1.00139.44           C  
ATOM    992  CG  ASN   122      40.301 -88.248 170.522  1.00139.44           C  
ATOM    993  ND2 ASN   122      39.310 -87.692 171.266  1.00139.44           N  
ATOM    994  OD1 ASN   122      41.494 -88.048 170.747  1.00139.44           O  
ATOM    995  N   LYS   123      43.248 -89.493 167.892  1.00103.10           N  
ATOM    996  CA  LYS   123      44.133 -88.683 167.111  1.00103.10           C  
ATOM    997  C   LYS   123      43.598 -88.645 165.712  1.00103.10           C  
ATOM    998  O   LYS   123      42.800 -89.493 165.317  1.00103.10           O  
ATOM    999  CB  LYS   123      45.580 -89.195 167.017  1.00103.10           C  
ATOM   1000  CG  LYS   123      46.455 -88.263 166.178  1.00103.10           C  
ATOM   1001  CD  LYS   123      47.960 -88.455 166.313  1.00103.10           C  
ATOM   1002  CE  LYS   123      48.739 -87.447 165.465  1.00103.10           C  
ATOM   1003  NZ  LYS   123      50.152 -87.395 165.897  1.00103.10           N1+
ATOM   1004  N   LEU   124      44.014 -87.619 164.934  1.00150.58           N  
ATOM   1005  CA  LEU   124      43.546 -87.454 163.589  1.00150.58           C  
ATOM   1006  C   LEU   124      44.361 -88.327 162.694  1.00150.58           C  
ATOM   1007  O   LEU   124      45.570 -88.151 162.552  1.00150.58           O  
ATOM   1008  CB  LEU   124      43.717 -86.026 163.033  1.00150.58           C  
ATOM   1009  CG  LEU   124      42.981 -84.921 163.814  1.00150.58           C  
ATOM   1010  CD1 LEU   124      43.544 -84.789 165.235  1.00150.58           C  
ATOM   1011  CD2 LEU   124      43.017 -83.578 163.066  1.00150.58           C  
ATOM   1012  N   GLY   125      43.688 -89.305 162.067  1.00 70.61           N  
ATOM   1013  CA  GLY   125      44.302 -90.170 161.114  1.00 70.61           C  
ATOM   1014  C   GLY   125      43.177 -90.956 160.537  1.00 70.61           C  
ATOM   1015  O   GLY   125      42.993 -92.133 160.847  1.00 70.61           O  
ATOM   1016  N   ARG   126      42.414 -90.316 159.636  1.00288.56           N  
ATOM   1017  CA  ARG   126      41.236 -90.919 159.098  1.00288.56           C  
ATOM   1018  C   ARG   126      40.297 -91.175 160.234  1.00288.56           C  
ATOM   1019  O   ARG   126      39.499 -92.111 160.194  1.00288.56           O  
ATOM   1020  CB  ARG   126      41.494 -92.249 158.371  1.00288.56           C  
ATOM   1021  CG  ARG   126      42.413 -92.059 157.169  1.00288.56           C  
ATOM   1022  CD  ARG   126      42.359 -90.631 156.630  1.00288.56           C  
ATOM   1023  NE  ARG   126      43.153 -90.591 155.373  1.00288.56           N  
ATOM   1024  CZ  ARG   126      42.534 -90.192 154.225  1.00288.56           C  
ATOM   1025  NH1 ARG   126      41.207 -89.879 154.268  1.00288.56           N1+
ATOM   1026  NH2 ARG   126      43.221 -90.114 153.049  1.00288.56           N  
ATOM   1027  N   LEU   127      40.383 -90.328 161.281  1.00157.79           N  
ATOM   1028  CA  LEU   127      39.528 -90.415 162.434  1.00157.79           C  
ATOM   1029  C   LEU   127      38.142 -90.070 162.001  1.00157.79           C  
ATOM   1030  O   LEU   127      37.169 -90.682 162.440  1.00157.79           O  
ATOM   1031  CB  LEU   127      39.878 -89.392 163.535  1.00157.79           C  
ATOM   1032  CG  LEU   127      38.959 -89.486 164.773  1.00157.79           C  
ATOM   1033  CD1 LEU   127      39.193 -90.811 165.519  1.00157.79           C  
ATOM   1034  CD2 LEU   127      39.077 -88.255 165.686  1.00157.79           C  
ATOM   1035  N   ARG   128      38.023 -89.067 161.110  1.00296.61           N  
ATOM   1036  CA  ARG   128      36.719 -88.634 160.723  1.00296.61           C  
ATOM   1037  C   ARG   128      36.018 -89.775 160.091  1.00296.61           C  
ATOM   1038  O   ARG   128      36.610 -90.602 159.400  1.00296.61           O  
ATOM   1039  CB  ARG   128      36.666 -87.446 159.736  1.00296.61           C  
ATOM   1040  CG  ARG   128      35.229 -87.162 159.281  1.00296.61           C  
ATOM   1041  CD  ARG   128      35.015 -85.895 158.439  1.00296.61           C  
ATOM   1042  NE  ARG   128      35.901 -85.938 157.240  1.00296.61           N  
ATOM   1043  CZ  ARG   128      35.372 -85.723 156.000  1.00296.61           C  
ATOM   1044  NH1 ARG   128      34.025 -85.570 155.852  1.00296.61           N1+
ATOM   1045  NH2 ARG   128      36.183 -85.685 154.900  1.00296.61           N  
ATOM   1046  N   SER   129      34.706 -89.857 160.348  1.00183.27           N  
ATOM   1047  CA  SER   129      33.954 -90.942 159.812  1.00183.27           C  
ATOM   1048  C   SER   129      32.789 -90.324 159.131  1.00183.27           C  
ATOM   1049  O   SER   129      32.564 -89.118 159.224  1.00183.27           O  
ATOM   1050  CB  SER   129      33.339 -91.856 160.883  1.00183.27           C  
ATOM   1051  OG  SER   129      34.343 -92.383 161.741  1.00183.27           O  
ATOM   1052  N   GLN   130      32.030 -91.152 158.401  1.00124.44           N  
ATOM   1053  CA  GLN   130      30.826 -90.649 157.838  1.00124.44           C  
ATOM   1054  C   GLN   130      30.023 -90.218 159.022  1.00124.44           C  
ATOM   1055  O   GLN   130      29.488 -89.111 159.060  1.00124.44           O  
ATOM   1056  CB  GLN   130      30.045 -91.751 157.093  1.00124.44           C  
ATOM   1057  CG  GLN   130      29.777 -92.979 157.973  1.00124.44           C  
ATOM   1058  CD  GLN   130      28.682 -93.831 157.368  1.00124.44           C  
ATOM   1059  NE2 GLN   130      27.556 -93.177 156.978  1.00124.44           N  
ATOM   1060  OE1 GLN   130      28.808 -95.051 157.275  1.00124.44           O  
ATOM   1061  N   GLU   131      29.976 -91.096 160.039  1.00229.78           N  
ATOM   1062  CA  GLU   131      29.304 -90.877 161.278  1.00229.78           C  
ATOM   1063  C   GLU   131      30.275 -91.304 162.323  1.00229.78           C  
ATOM   1064  O   GLU   131      30.852 -92.385 162.235  1.00229.78           O  
ATOM   1065  CB  GLU   131      28.050 -91.751 161.473  1.00229.78           C  
ATOM   1066  CG  GLU   131      26.749 -91.197 160.879  1.00229.78           C  
ATOM   1067  CD  GLU   131      25.973 -90.572 162.038  1.00229.78           C  
ATOM   1068  OE1 GLU   131      26.629 -90.248 163.064  1.00229.78           O  
ATOM   1069  OE2 GLU   131      24.728 -90.420 161.926  1.00229.78           O1-
ATOM   1070  N   ASP   132      30.474 -90.454 163.341  1.00214.59           N  
ATOM   1071  CA  ASP   132      31.395 -90.793 164.377  1.00214.59           C  
ATOM   1072  C   ASP   132      30.739 -91.805 165.251  1.00214.59           C  
ATOM   1073  O   ASP   132      29.553 -92.090 165.090  1.00214.59           O  
ATOM   1074  CB  ASP   132      31.866 -89.571 165.195  1.00214.59           C  
ATOM   1075  CG  ASP   132      30.660 -88.826 165.763  1.00214.59           C  
ATOM   1076  OD1 ASP   132      29.724 -89.484 166.283  1.00214.59           O  
ATOM   1077  OD2 ASP   132      30.663 -87.570 165.659  1.00214.59           O1-
ATOM   1078  N   GLU   133      31.528 -92.389 166.178  1.00 68.89           N  
ATOM   1079  CA  GLU   133      31.082 -93.429 167.069  1.00 68.89           C  
ATOM   1080  C   GLU   133      31.201 -94.744 166.326  1.00 68.89           C  
ATOM   1081  O   GLU   133      32.325 -95.305 166.276  1.00 68.89           O  
ATOM   1082  CB  GLU   133      29.620 -93.316 167.528  1.00 68.89           C  
ATOM   1083  CG  GLU   133      29.357 -92.139 168.456  1.00 68.89           C  
ATOM   1084  CD  GLU   133      27.860 -92.084 168.706  1.00 68.89           C  
ATOM   1085  OE1 GLU   133      27.177 -93.124 168.491  1.00 68.89           O  
ATOM   1086  OE2 GLU   133      27.380 -90.996 169.111  1.00 68.89           O1-
ATOM   1087  OXT GLU   133      30.153 -95.213 165.805  1.00 68.89           O1-
END
